# Supplementary material for: A novel arctigenin derivative ameliorates memory impairment and pathologies by activating adiponectin receptor 1-mediated autophagy and regulating amyloid precursor protein processing of Alzheimer's disease
Source: Research Square preprint supplement (doi:10.21203/rs.3.rs-7035906/v1), 2025-08-22
Supplement: Supplementary file 1 [file 62ebd4d288aa763d45c4c6df.docx]

Figure 5A


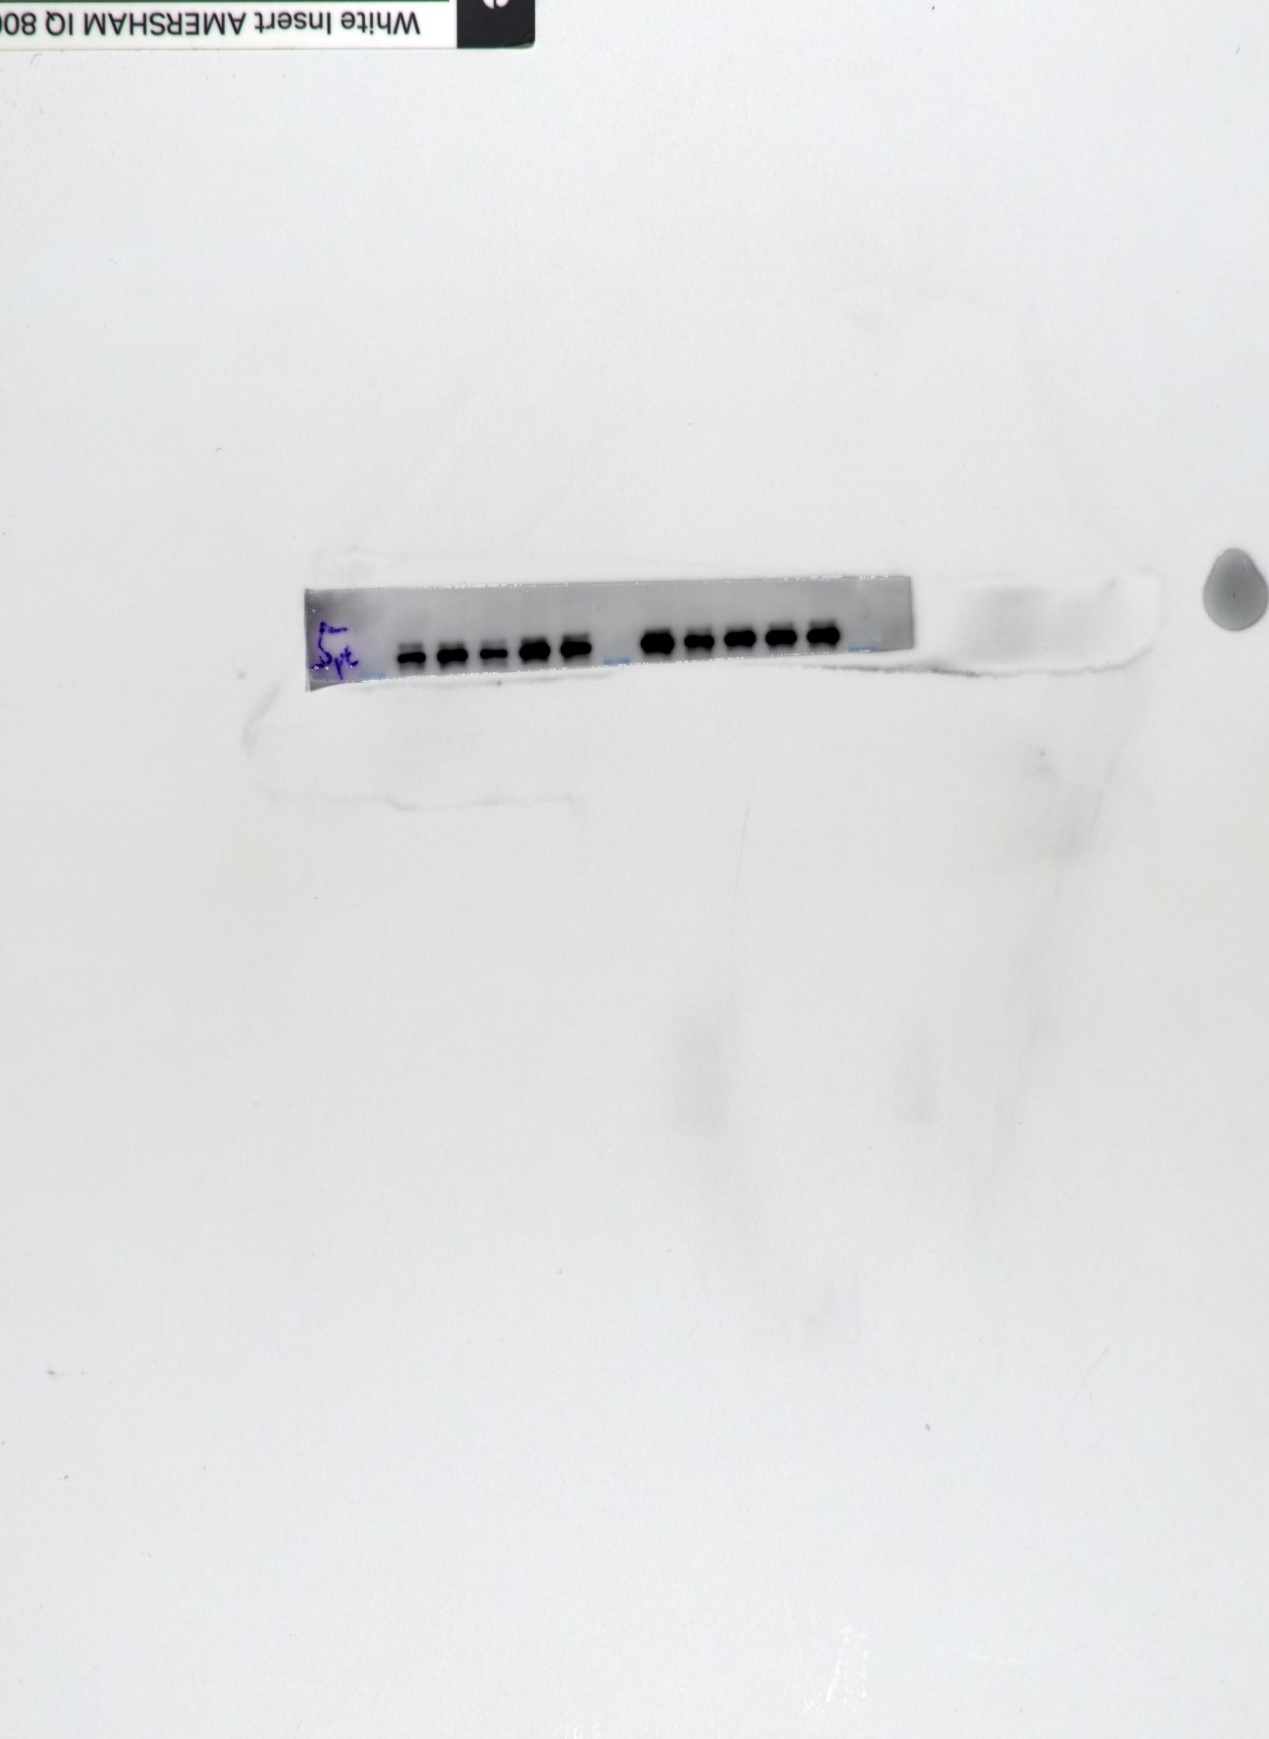


p-mTOR 289KDa


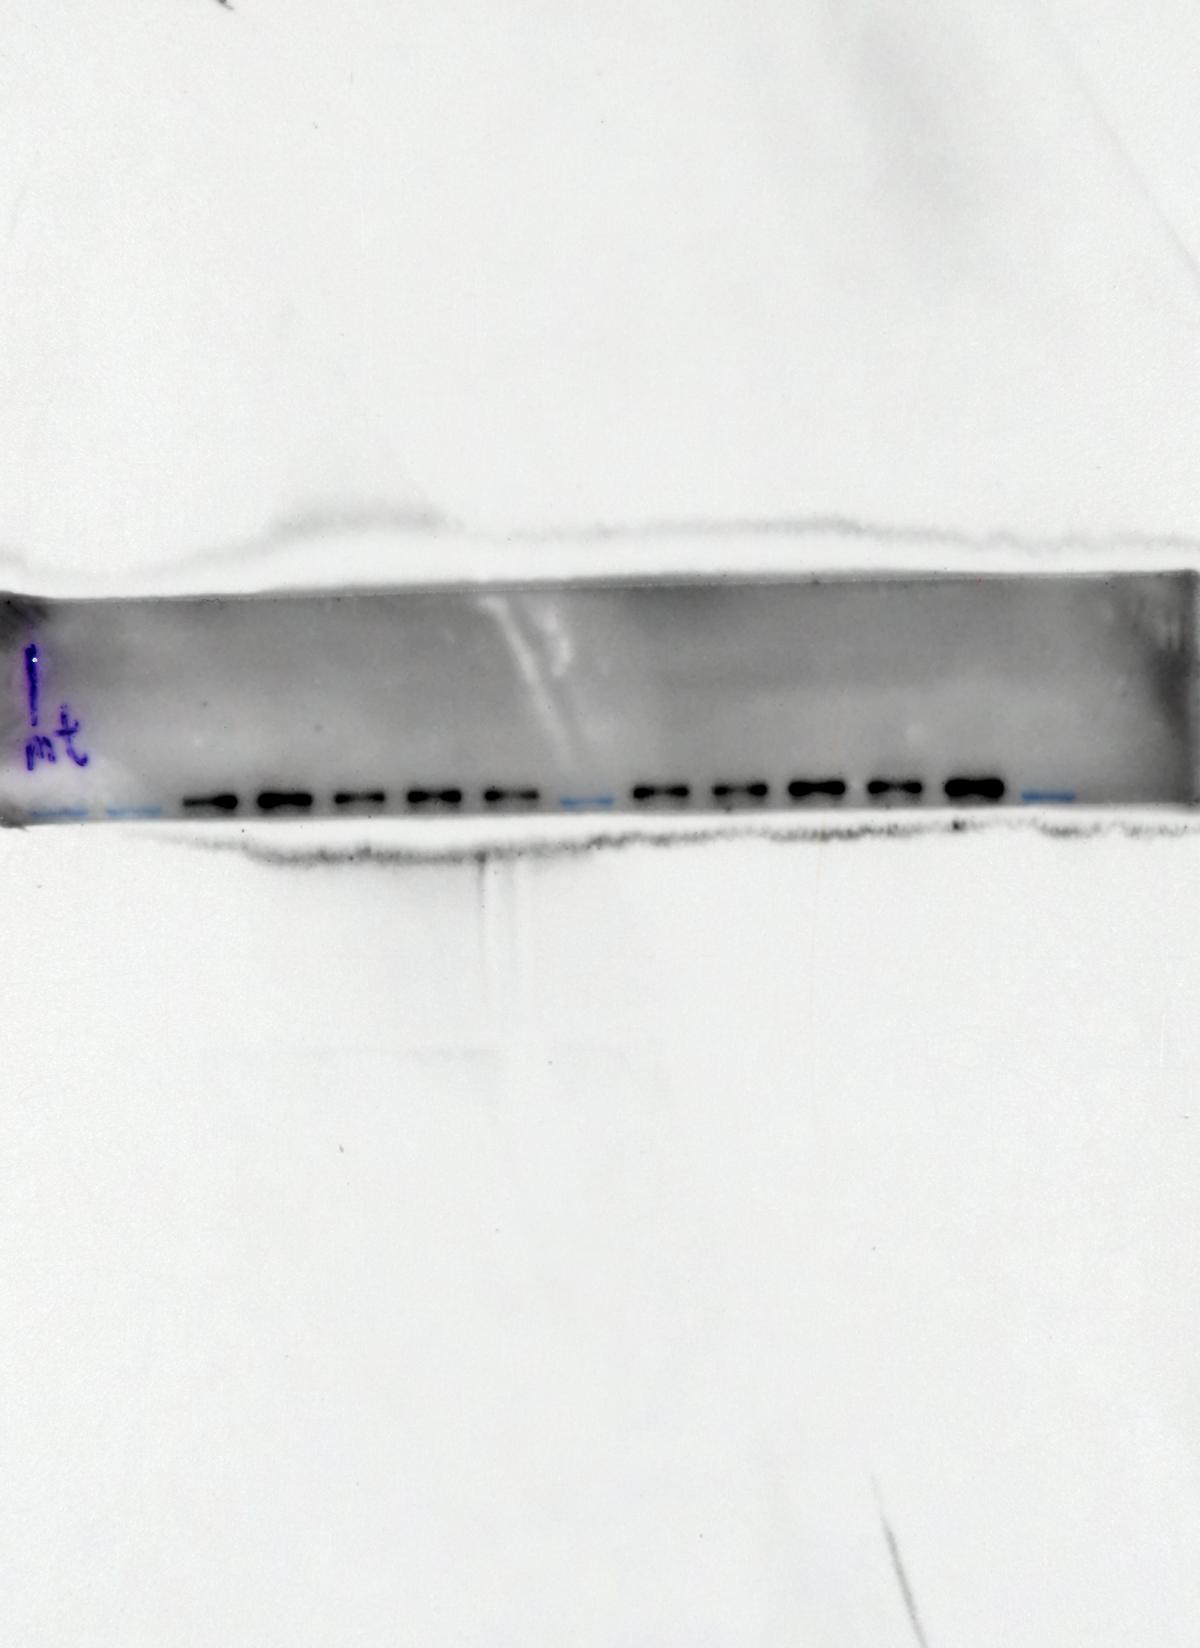


mTOR 289KDa


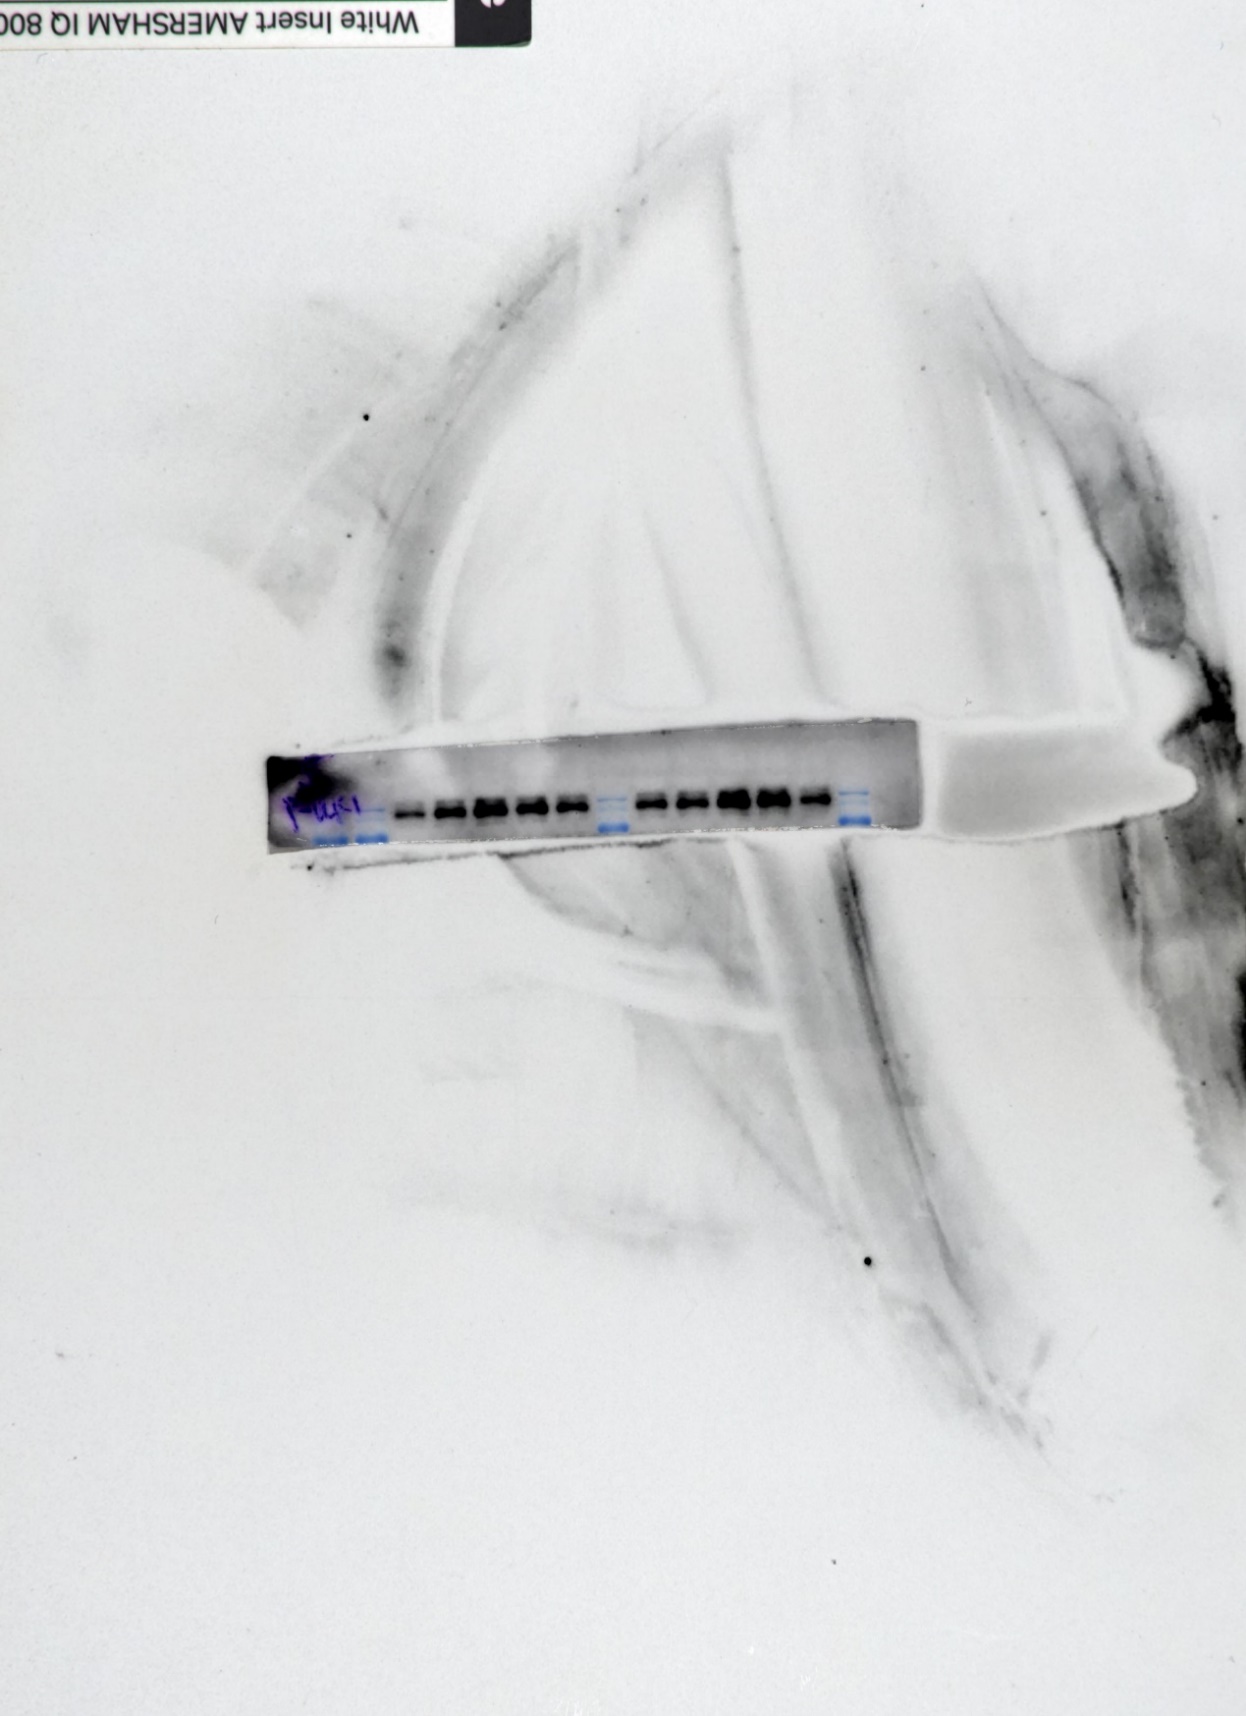


p-ULK1 140KDa


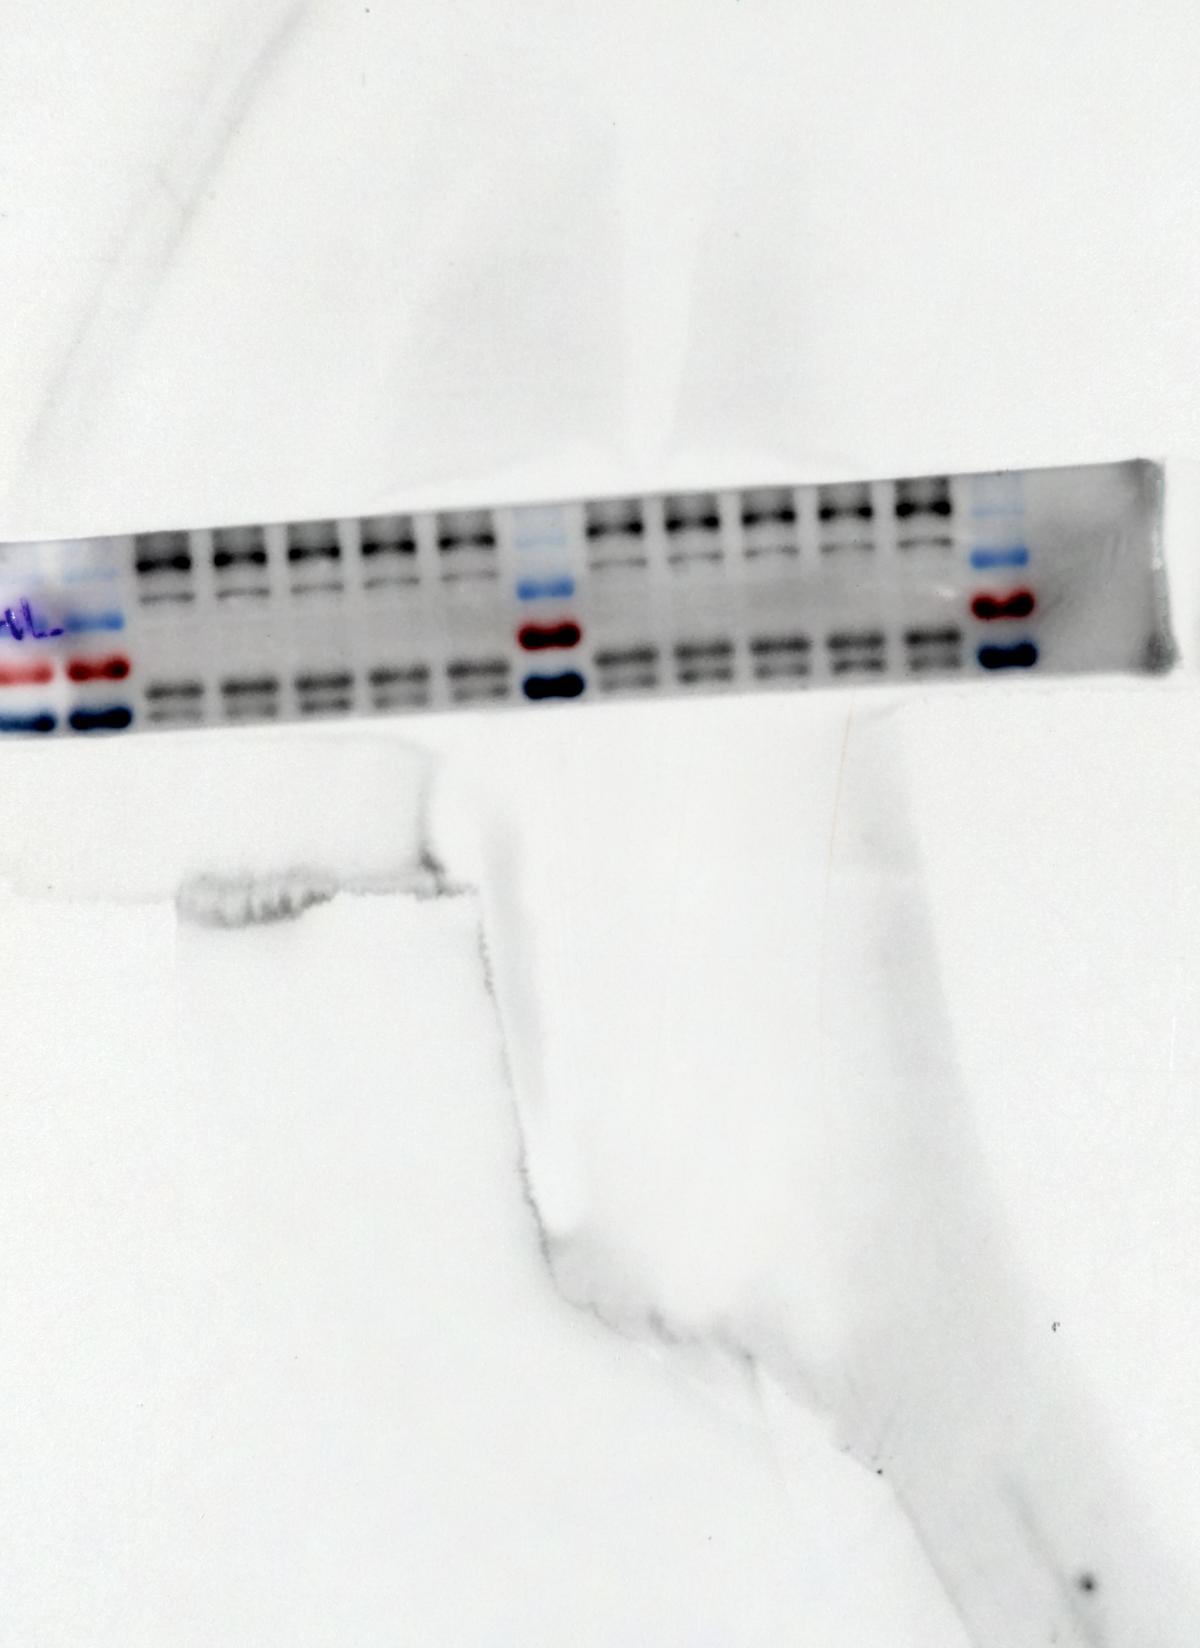


ULK1 140KDa


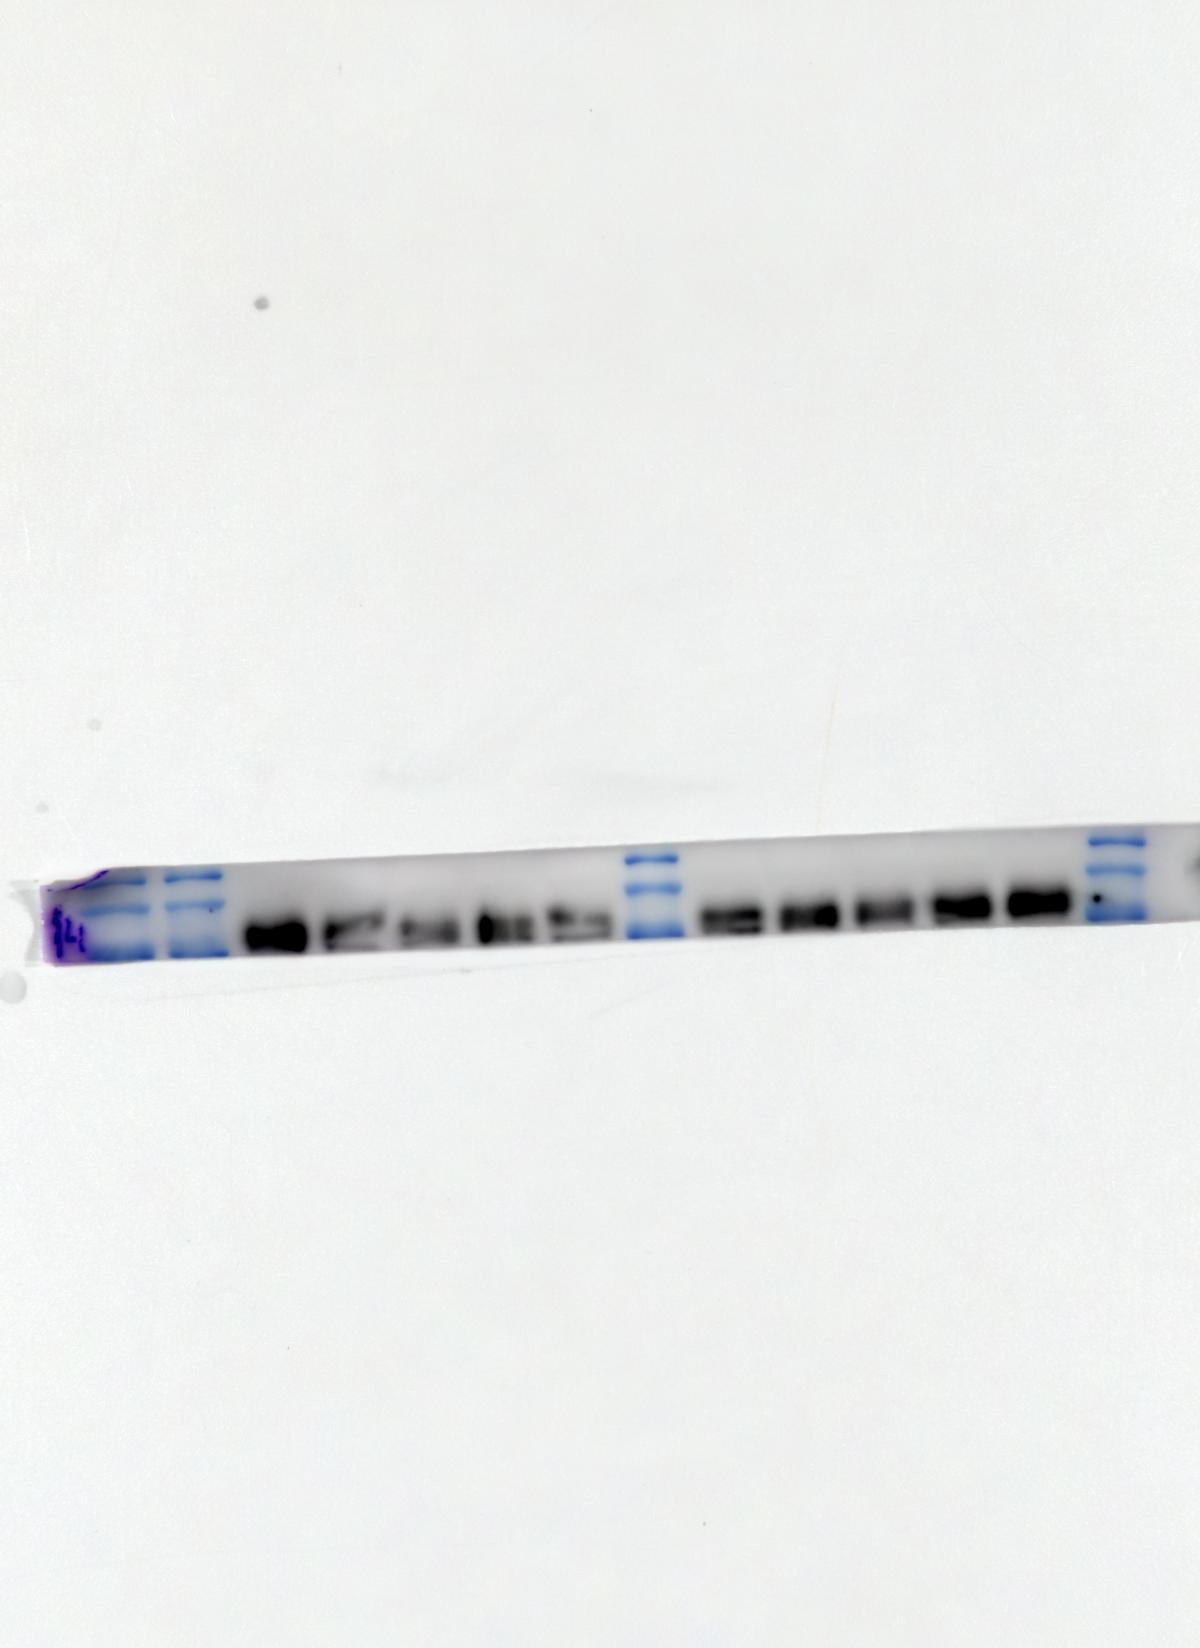


LAMP1 100KDa


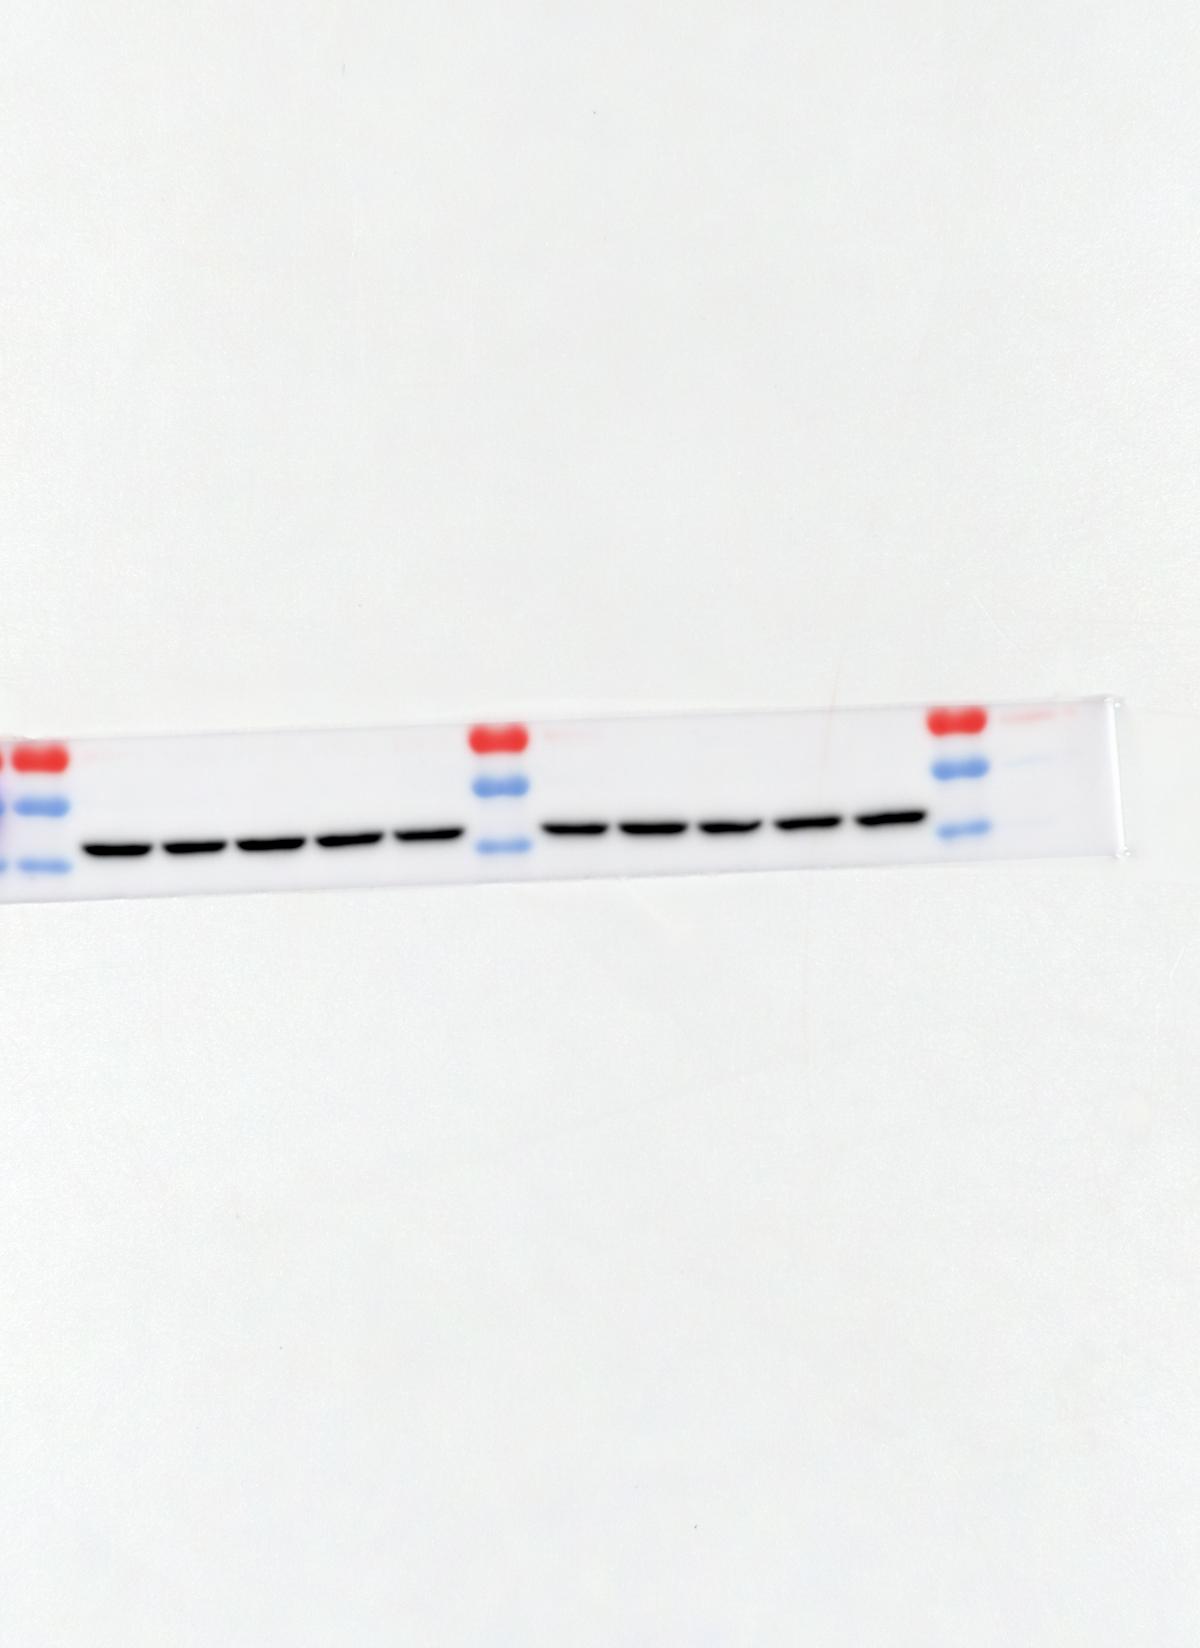


β-actin 42KDa


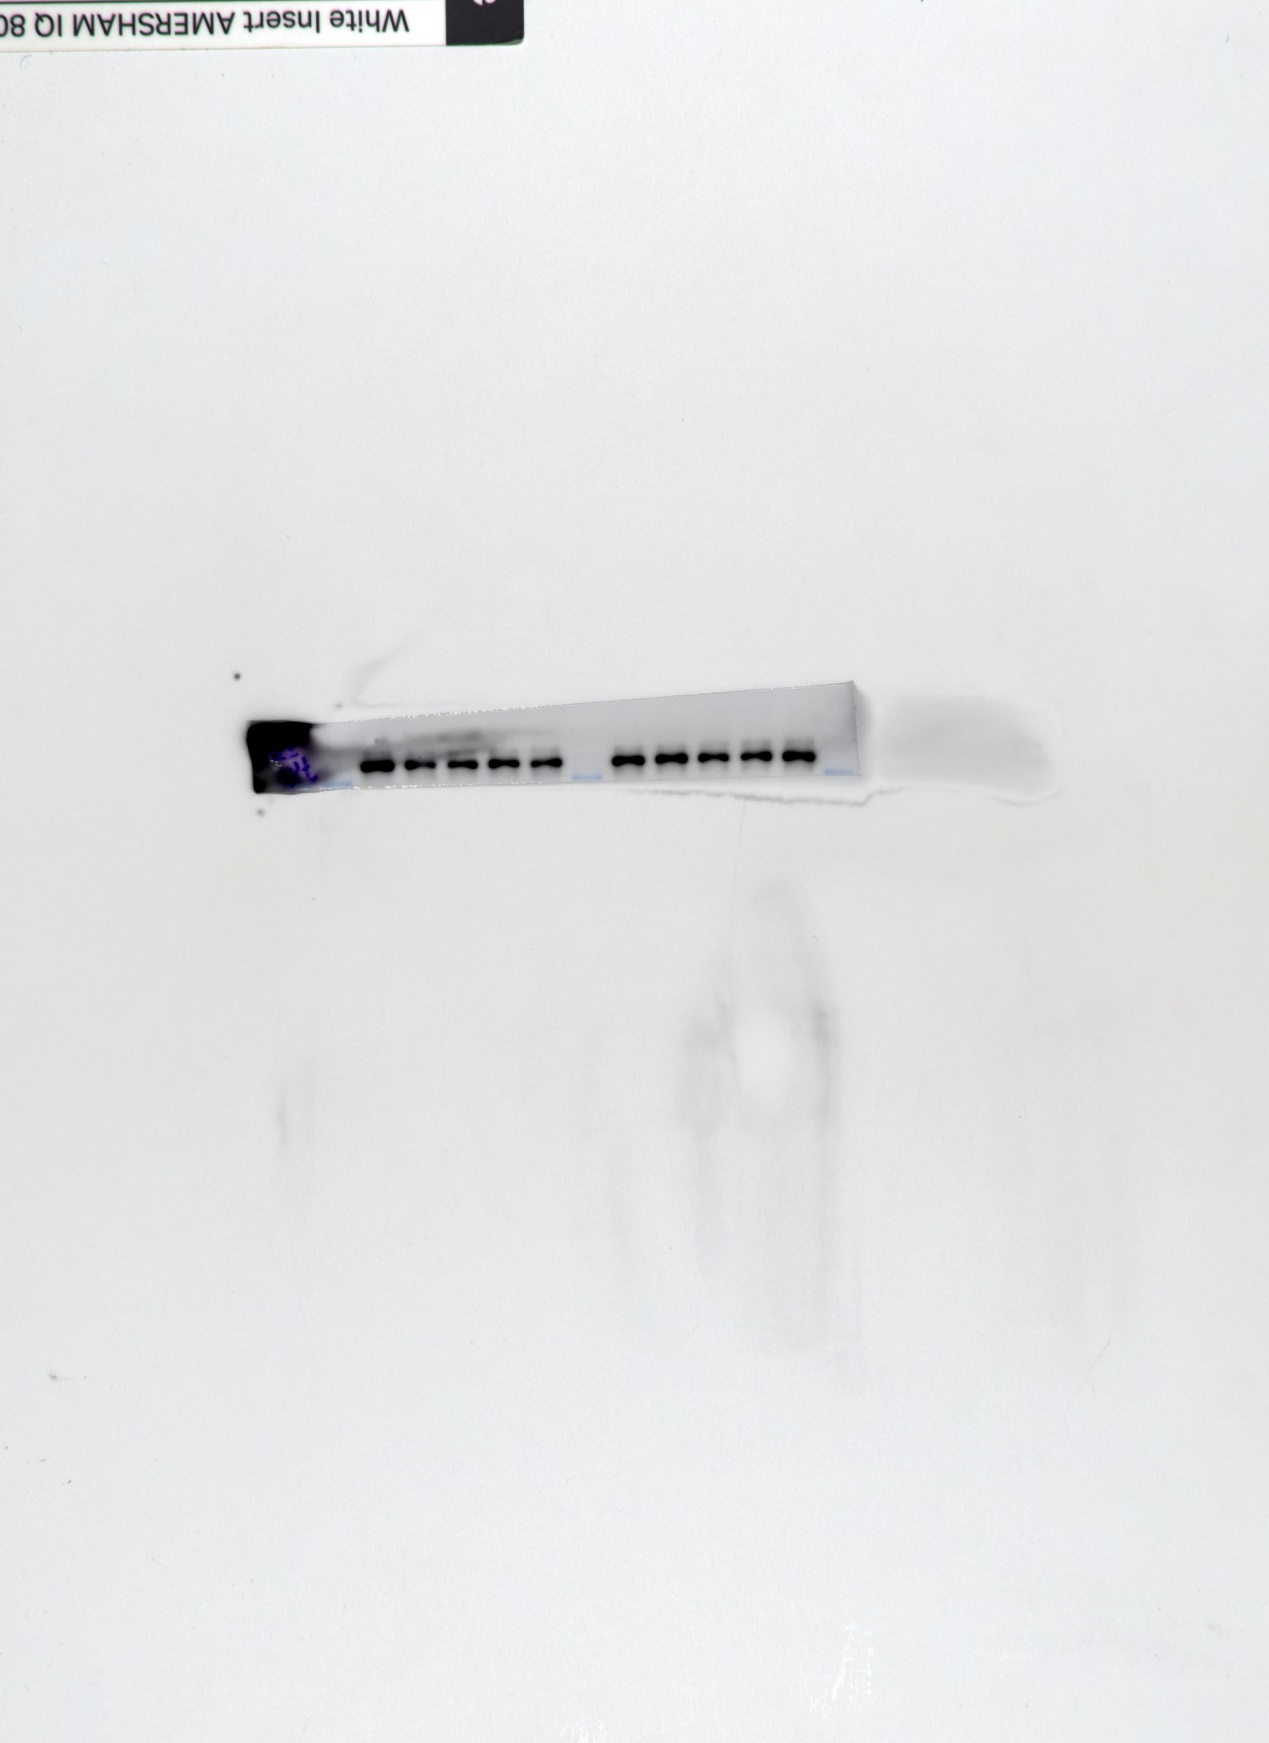


p-mTOR 289KDa


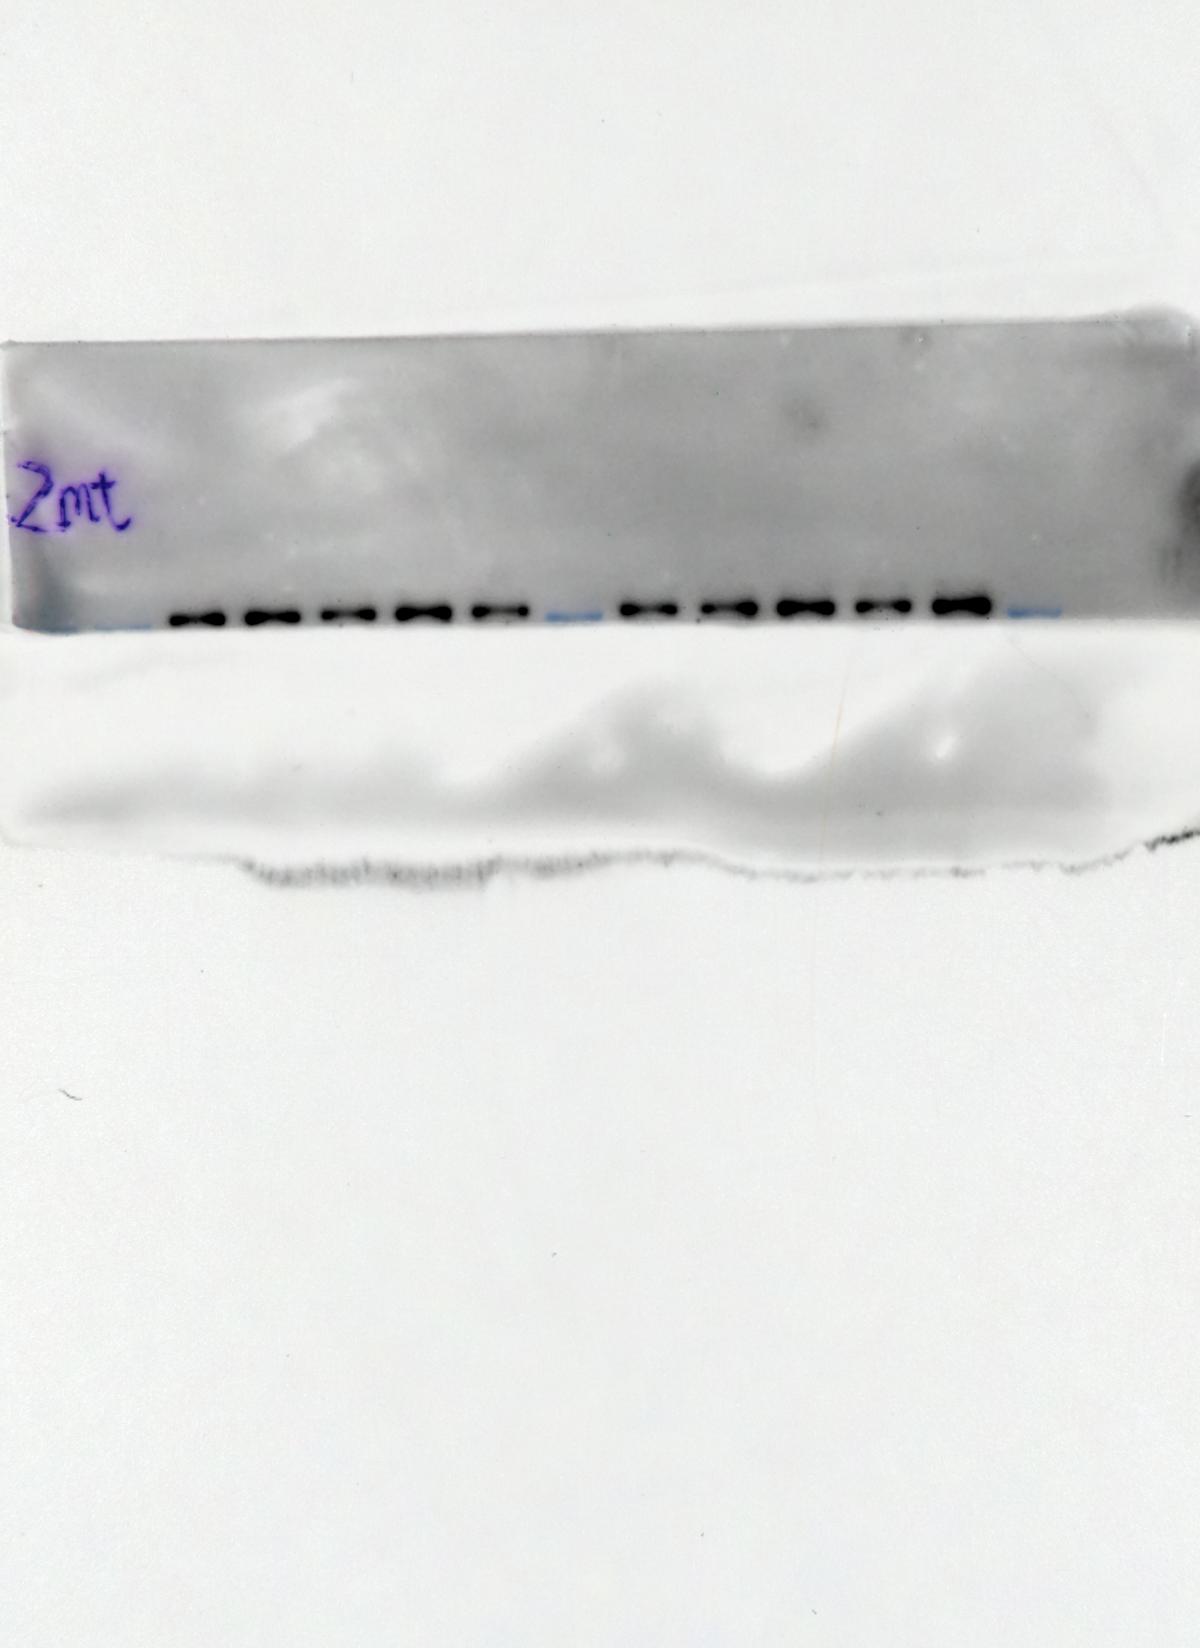


mTOR 289KDa


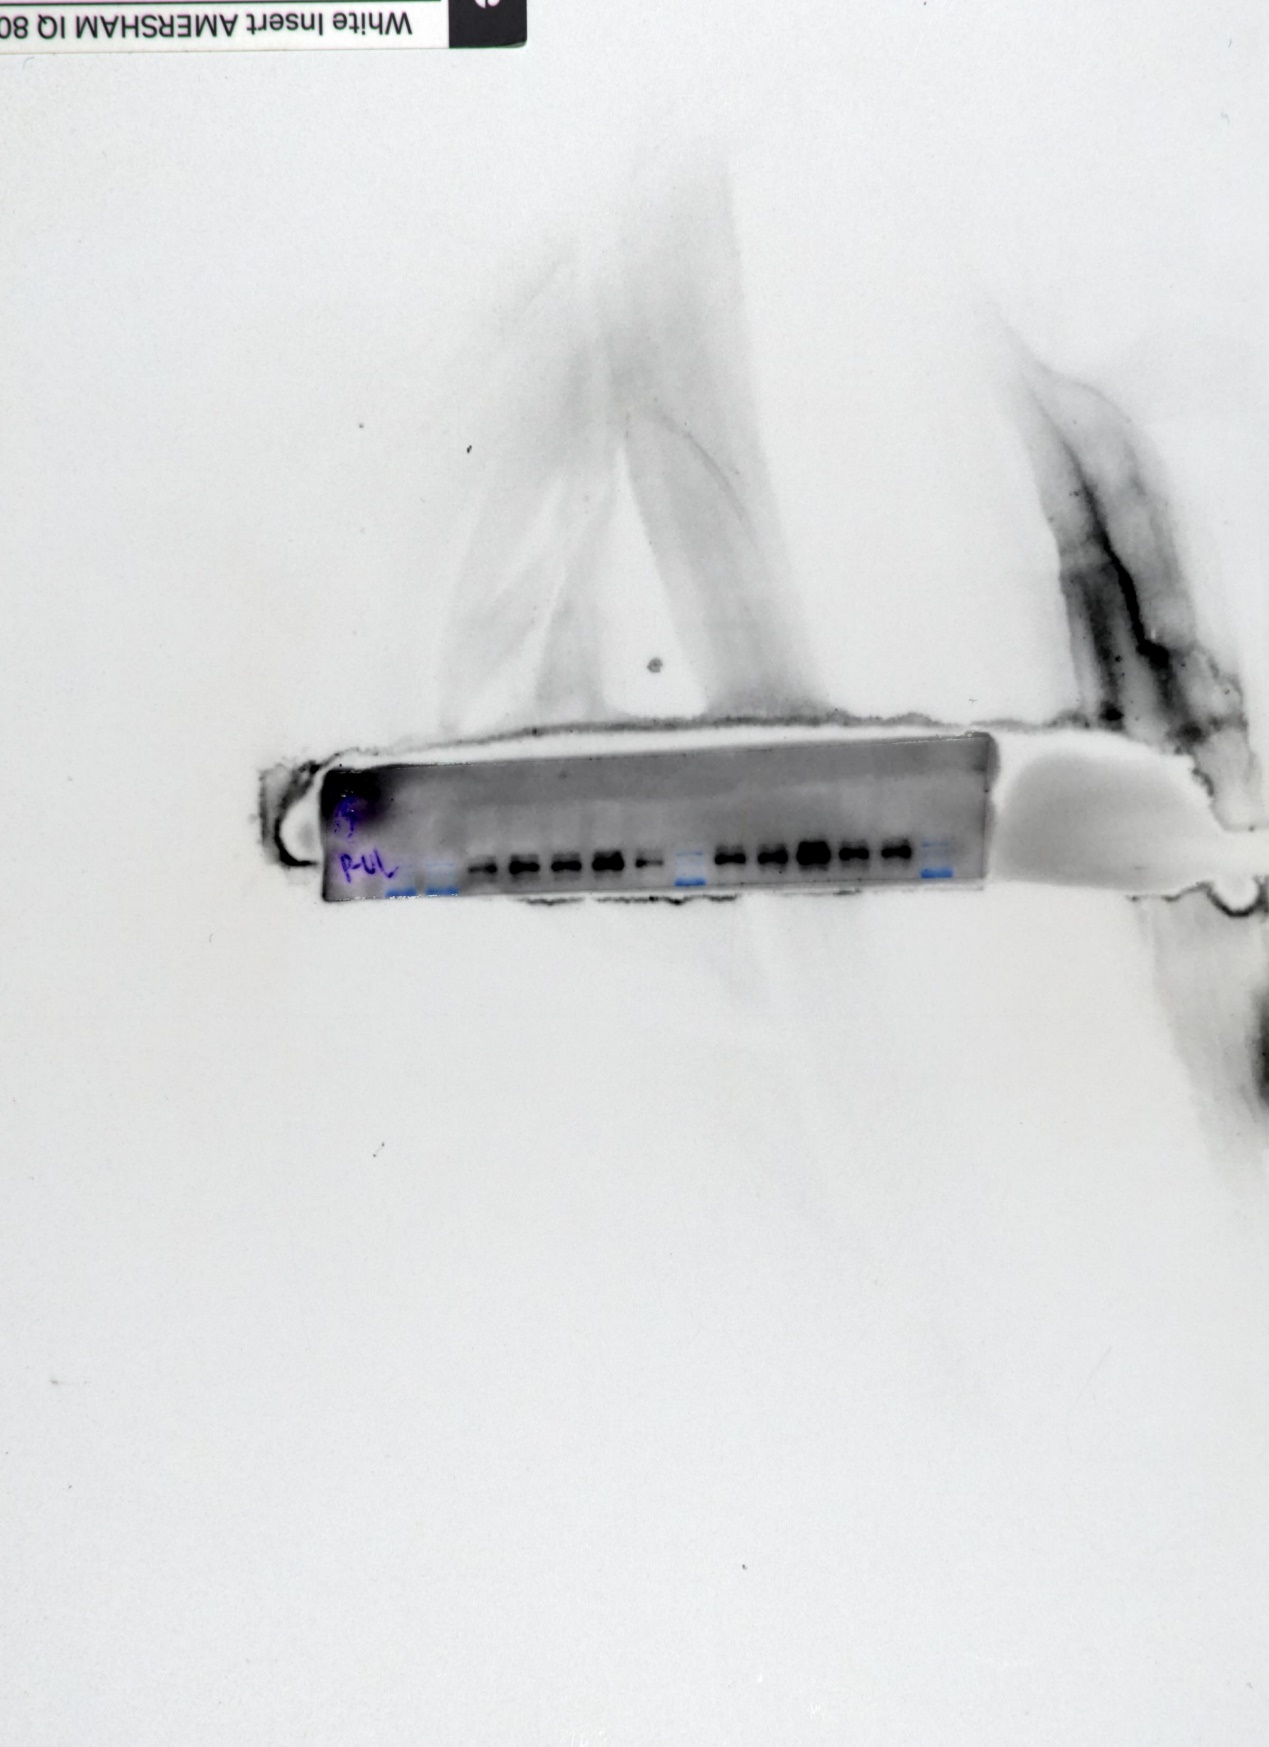


p-ULK1 140KDa


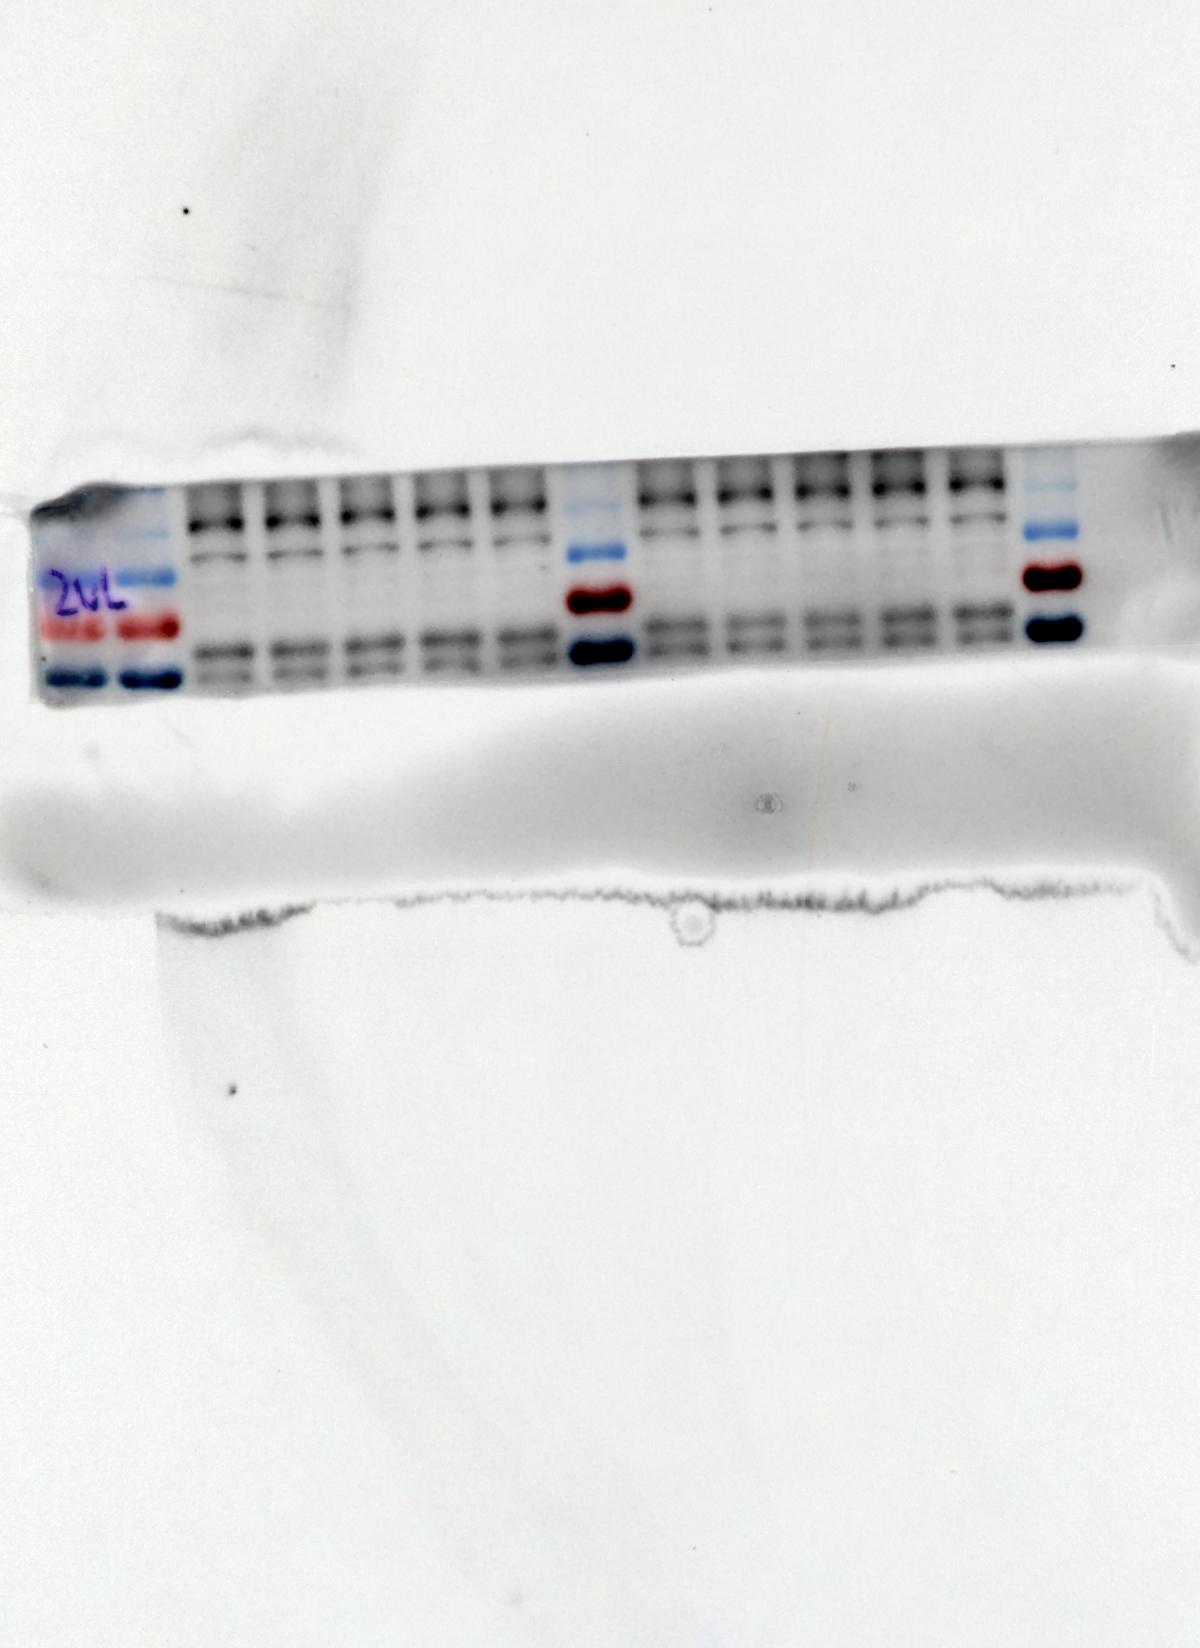


ULK1 140KDa


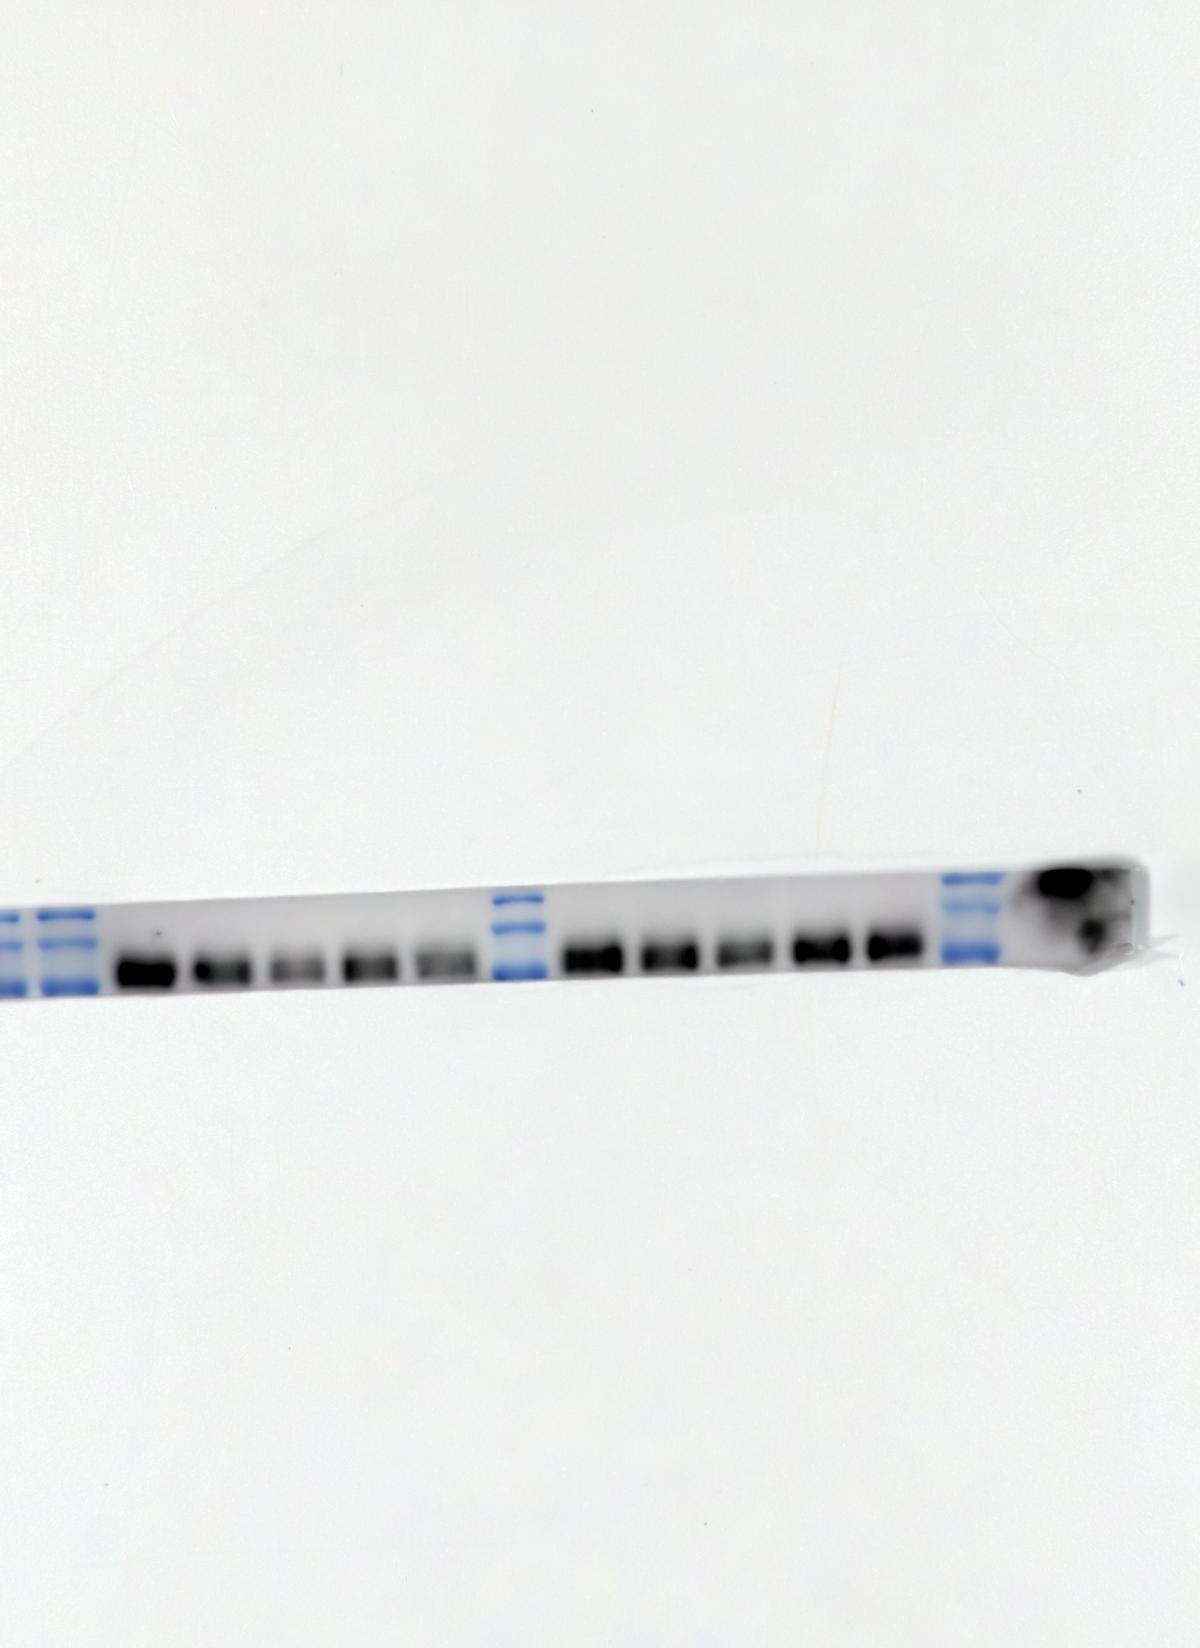


LAMP1 100KDa


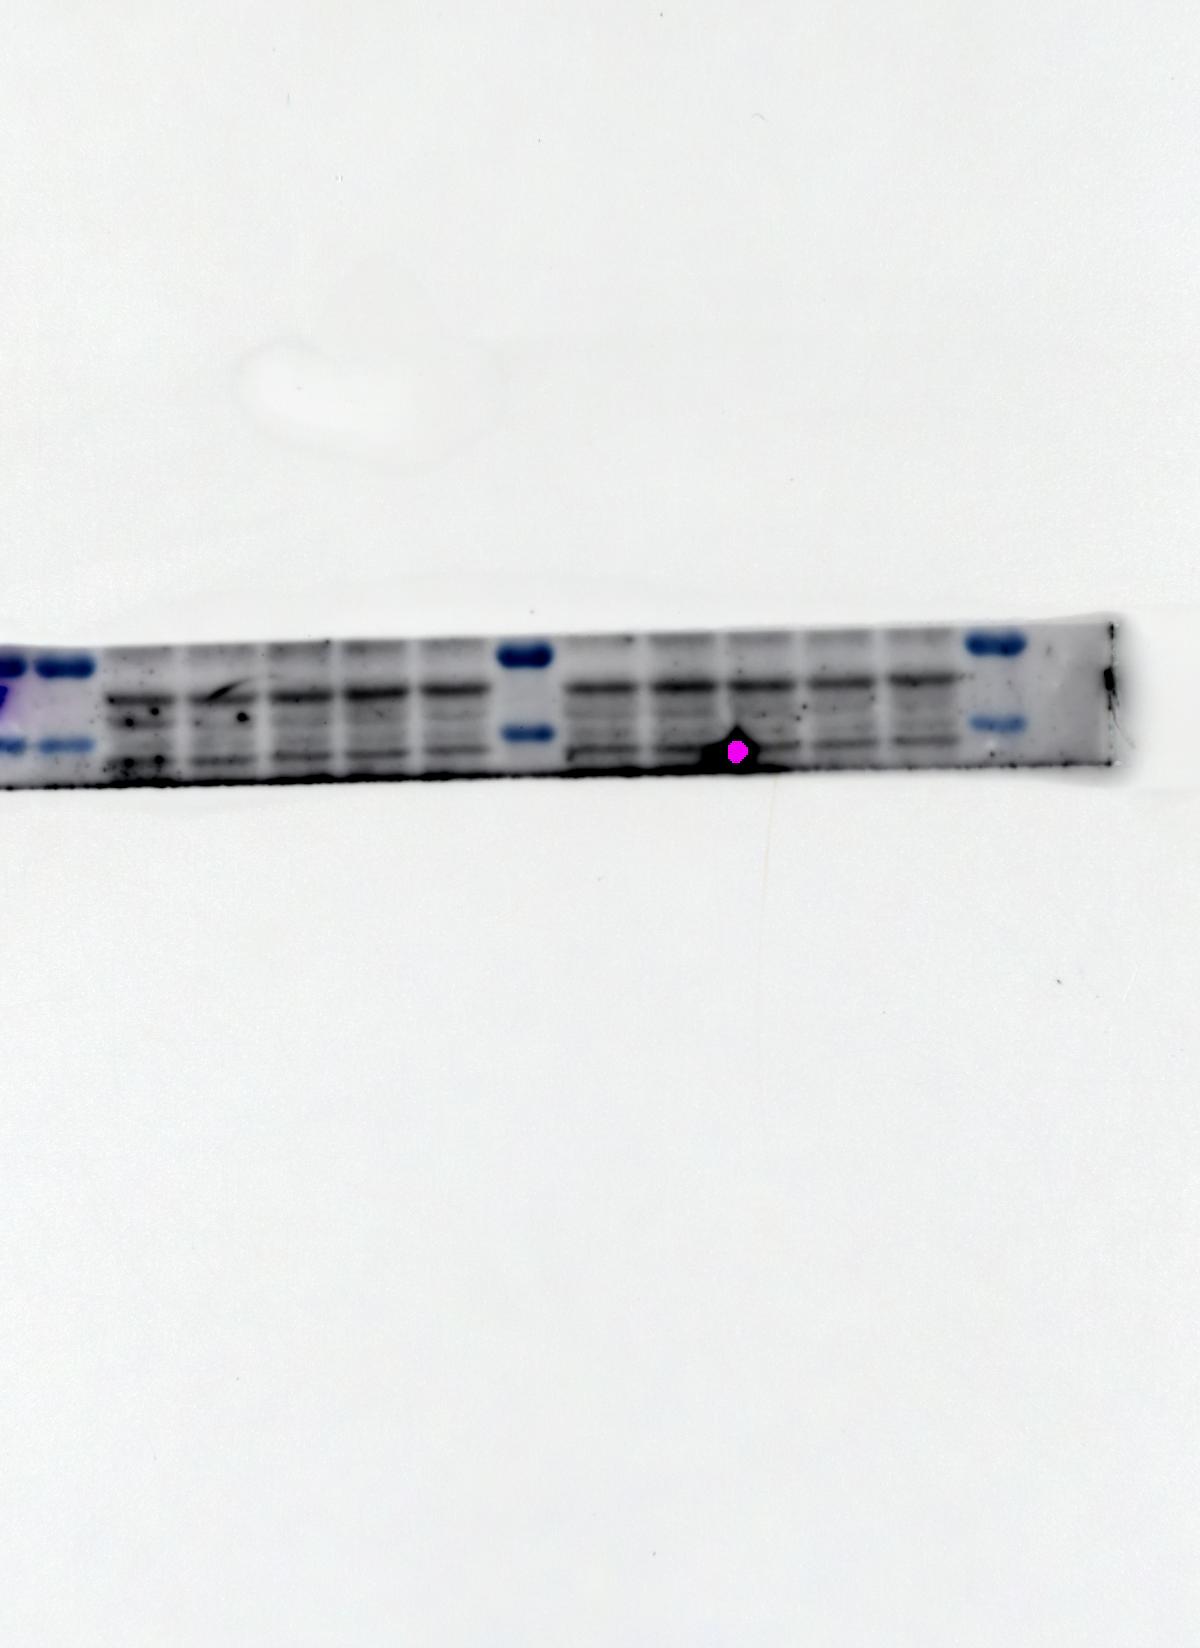


β-actin 42KDa


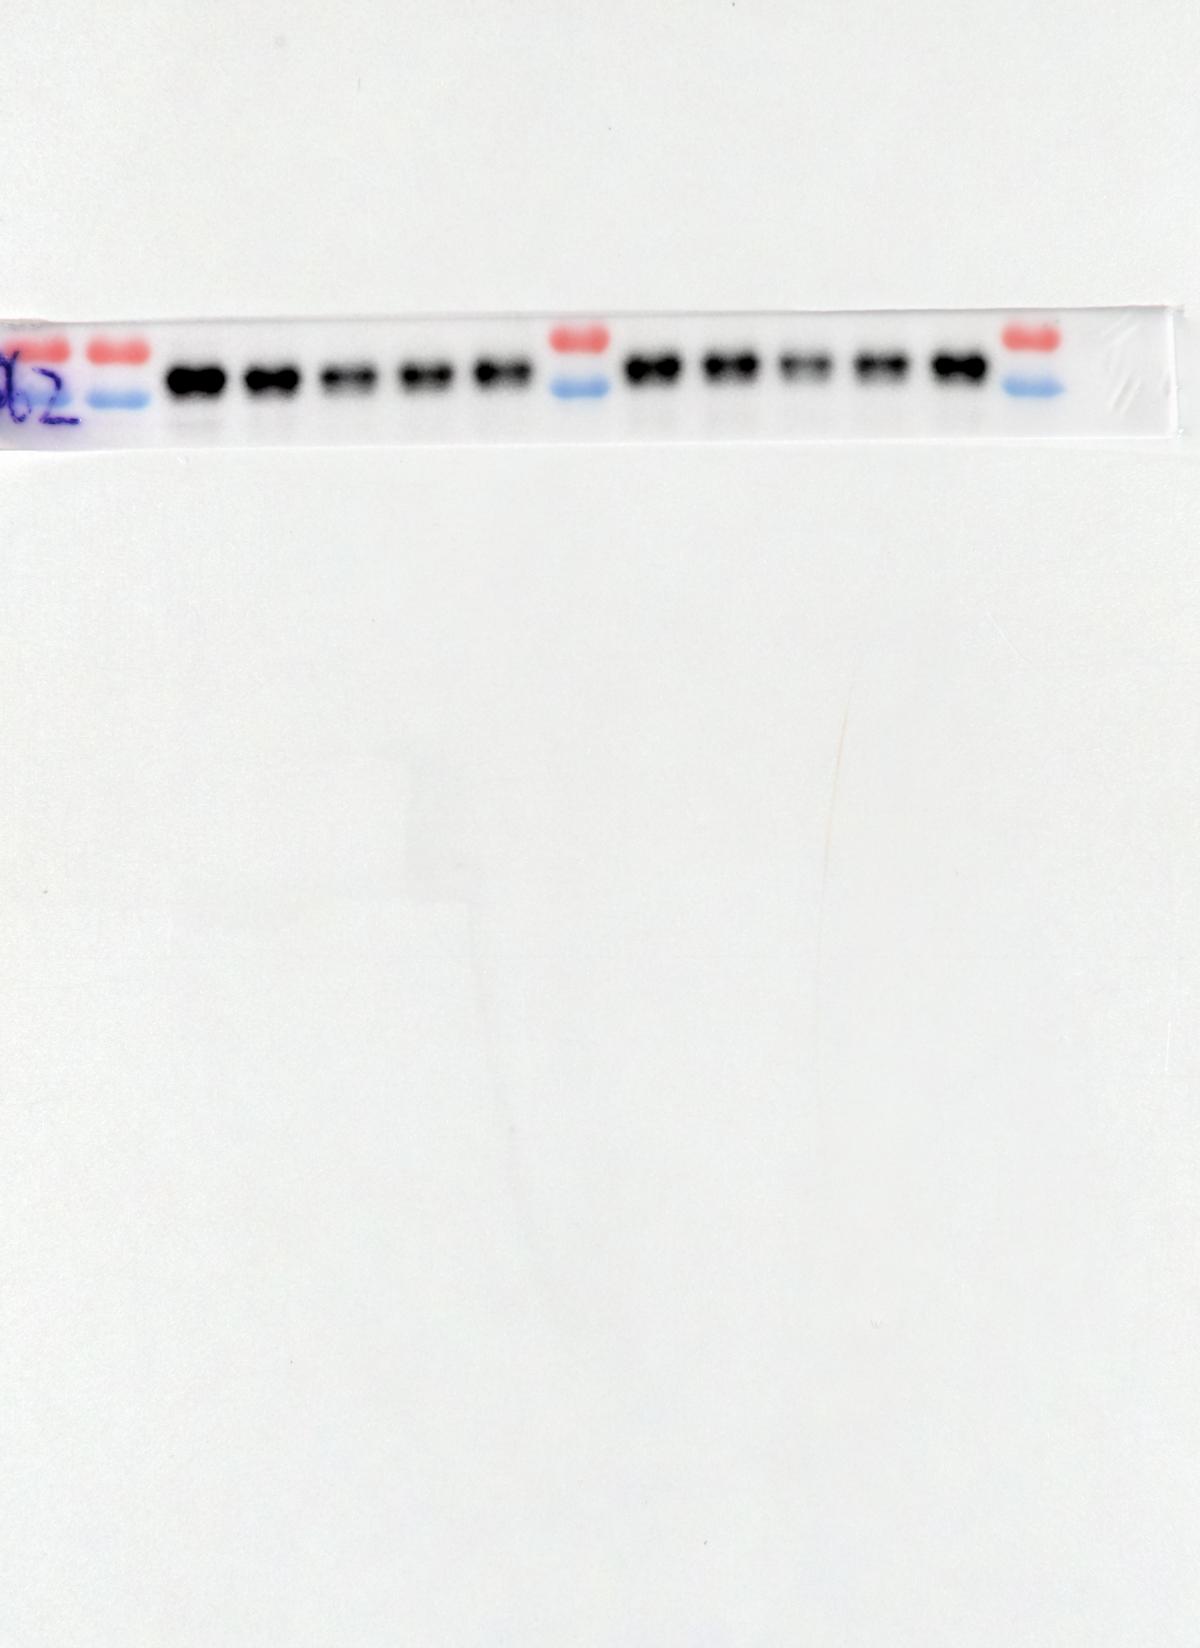


P62 62KDa


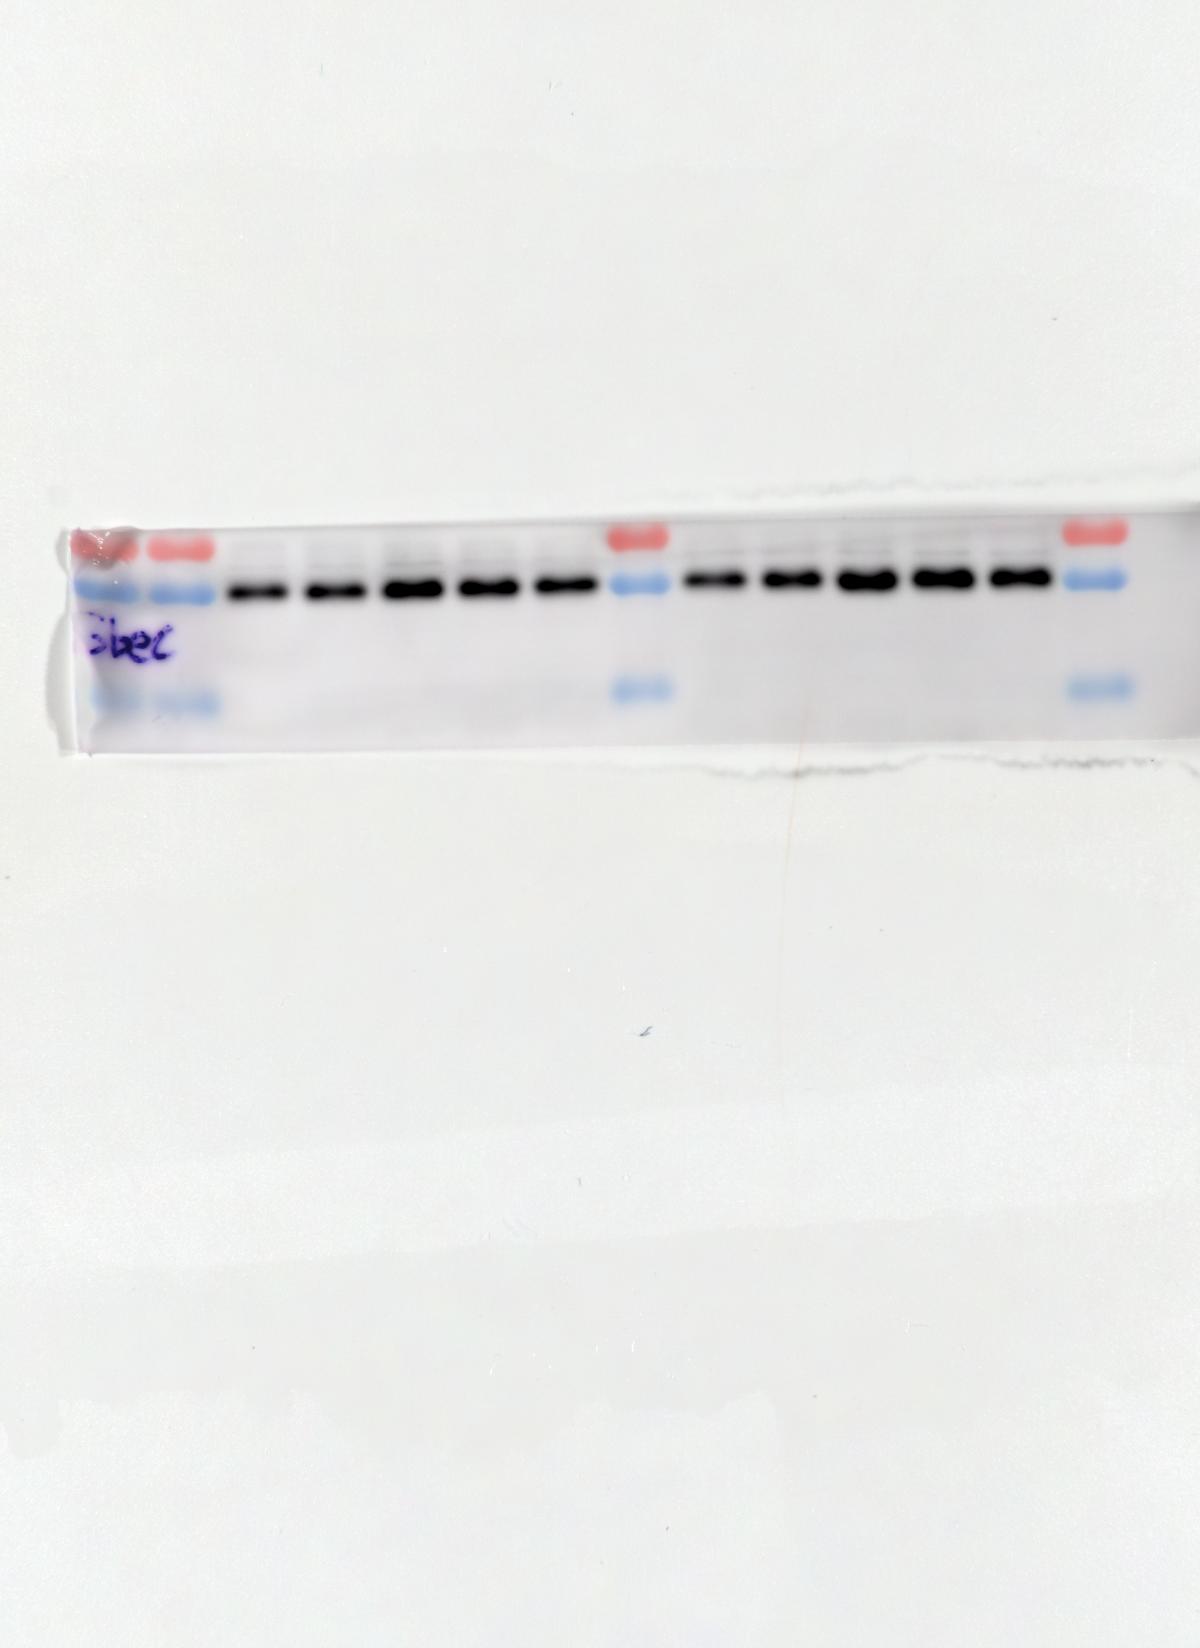


Beclin1 60KDa


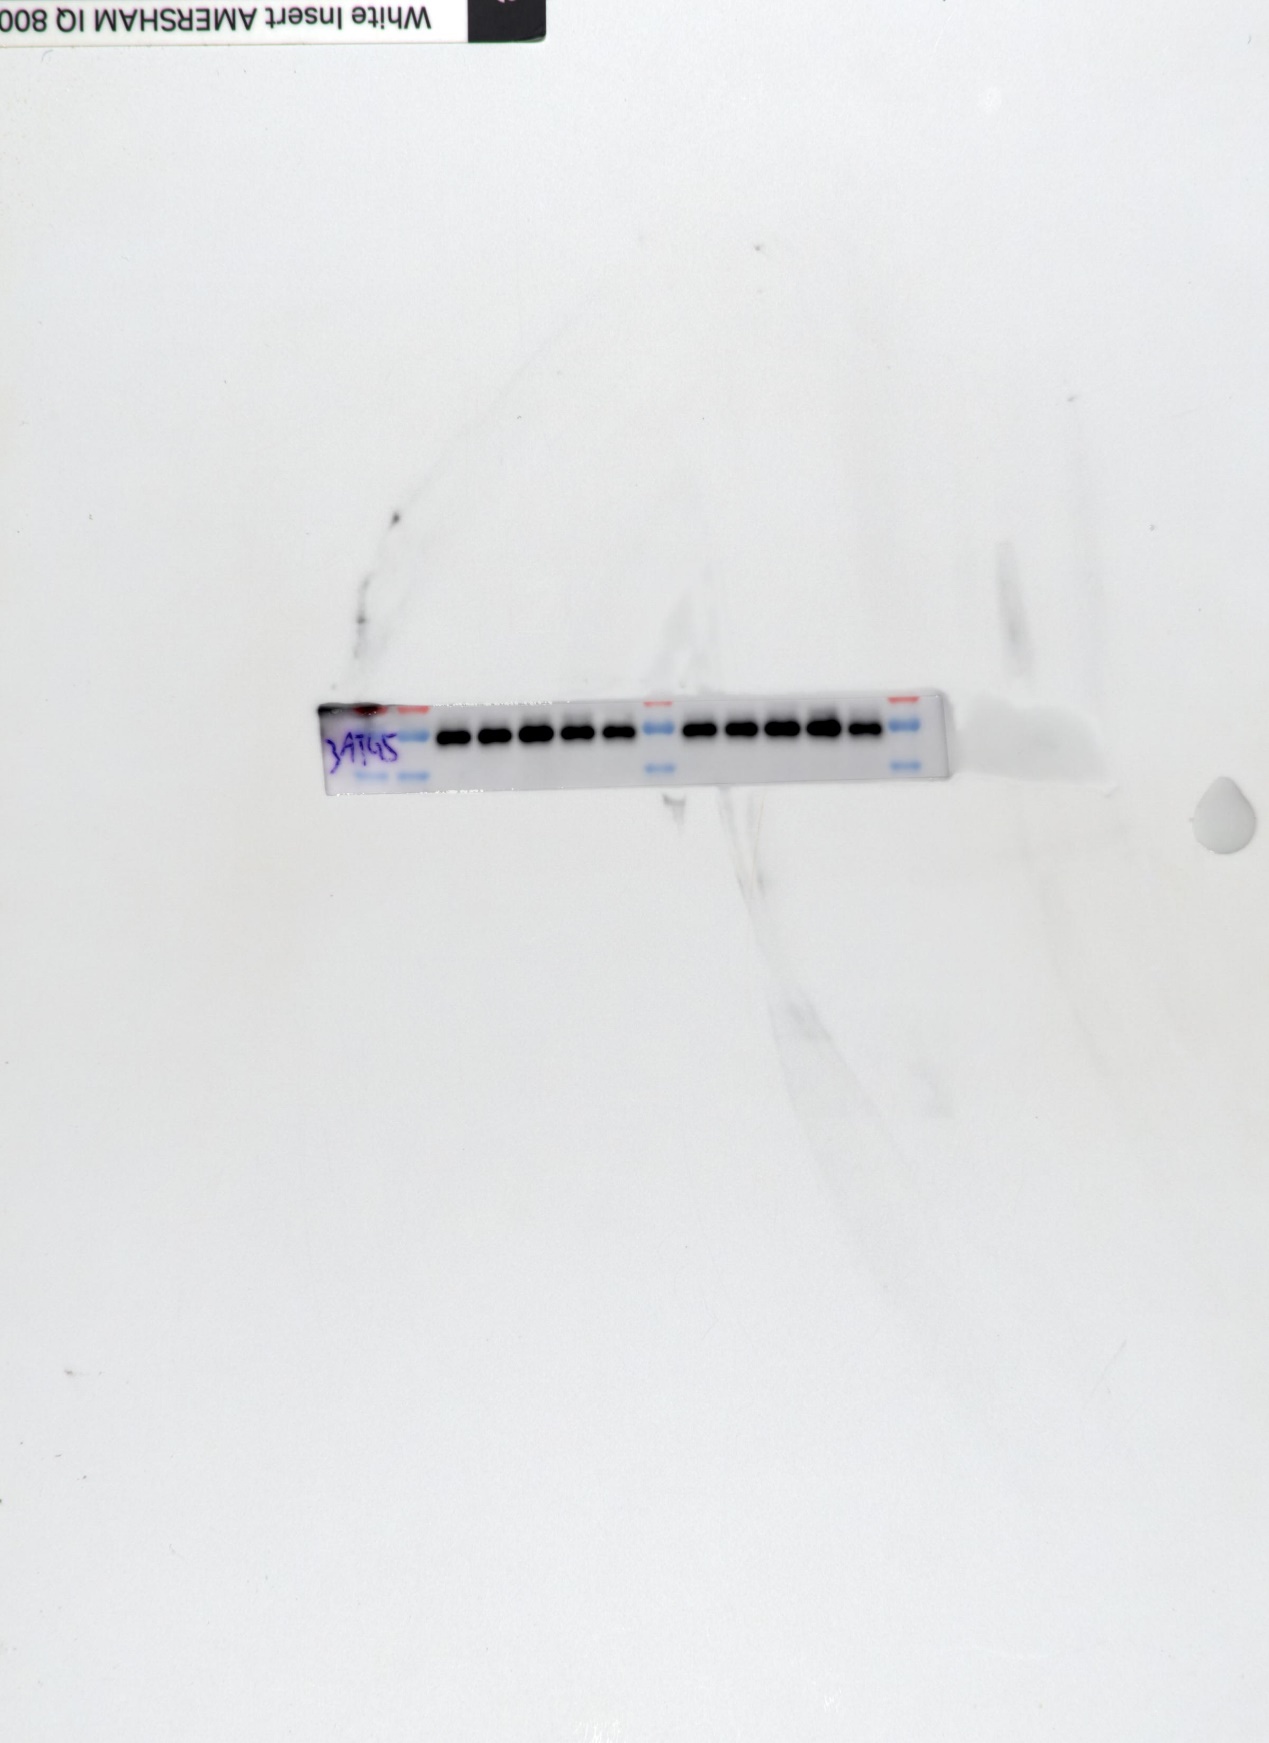


ATG5 55KDa


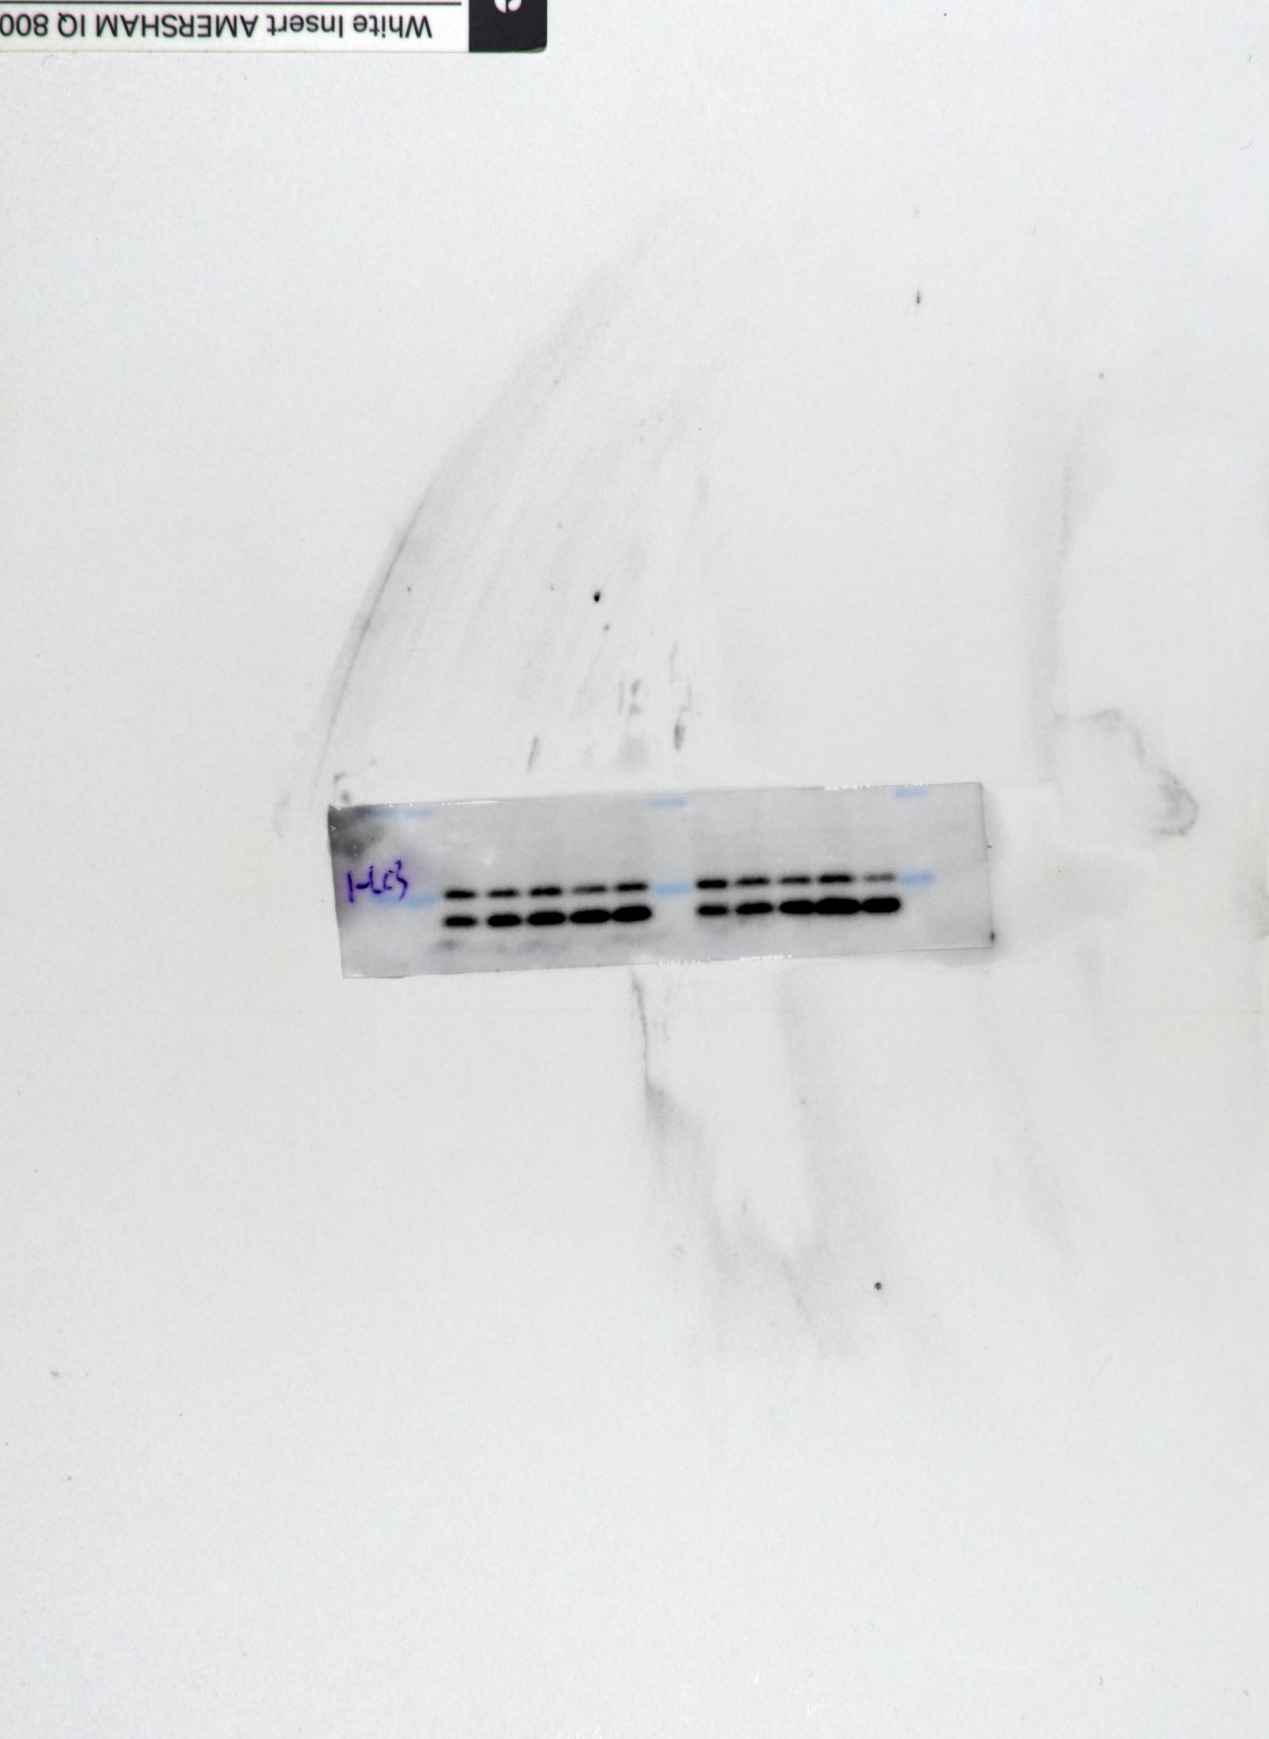


LC3B 14KDa


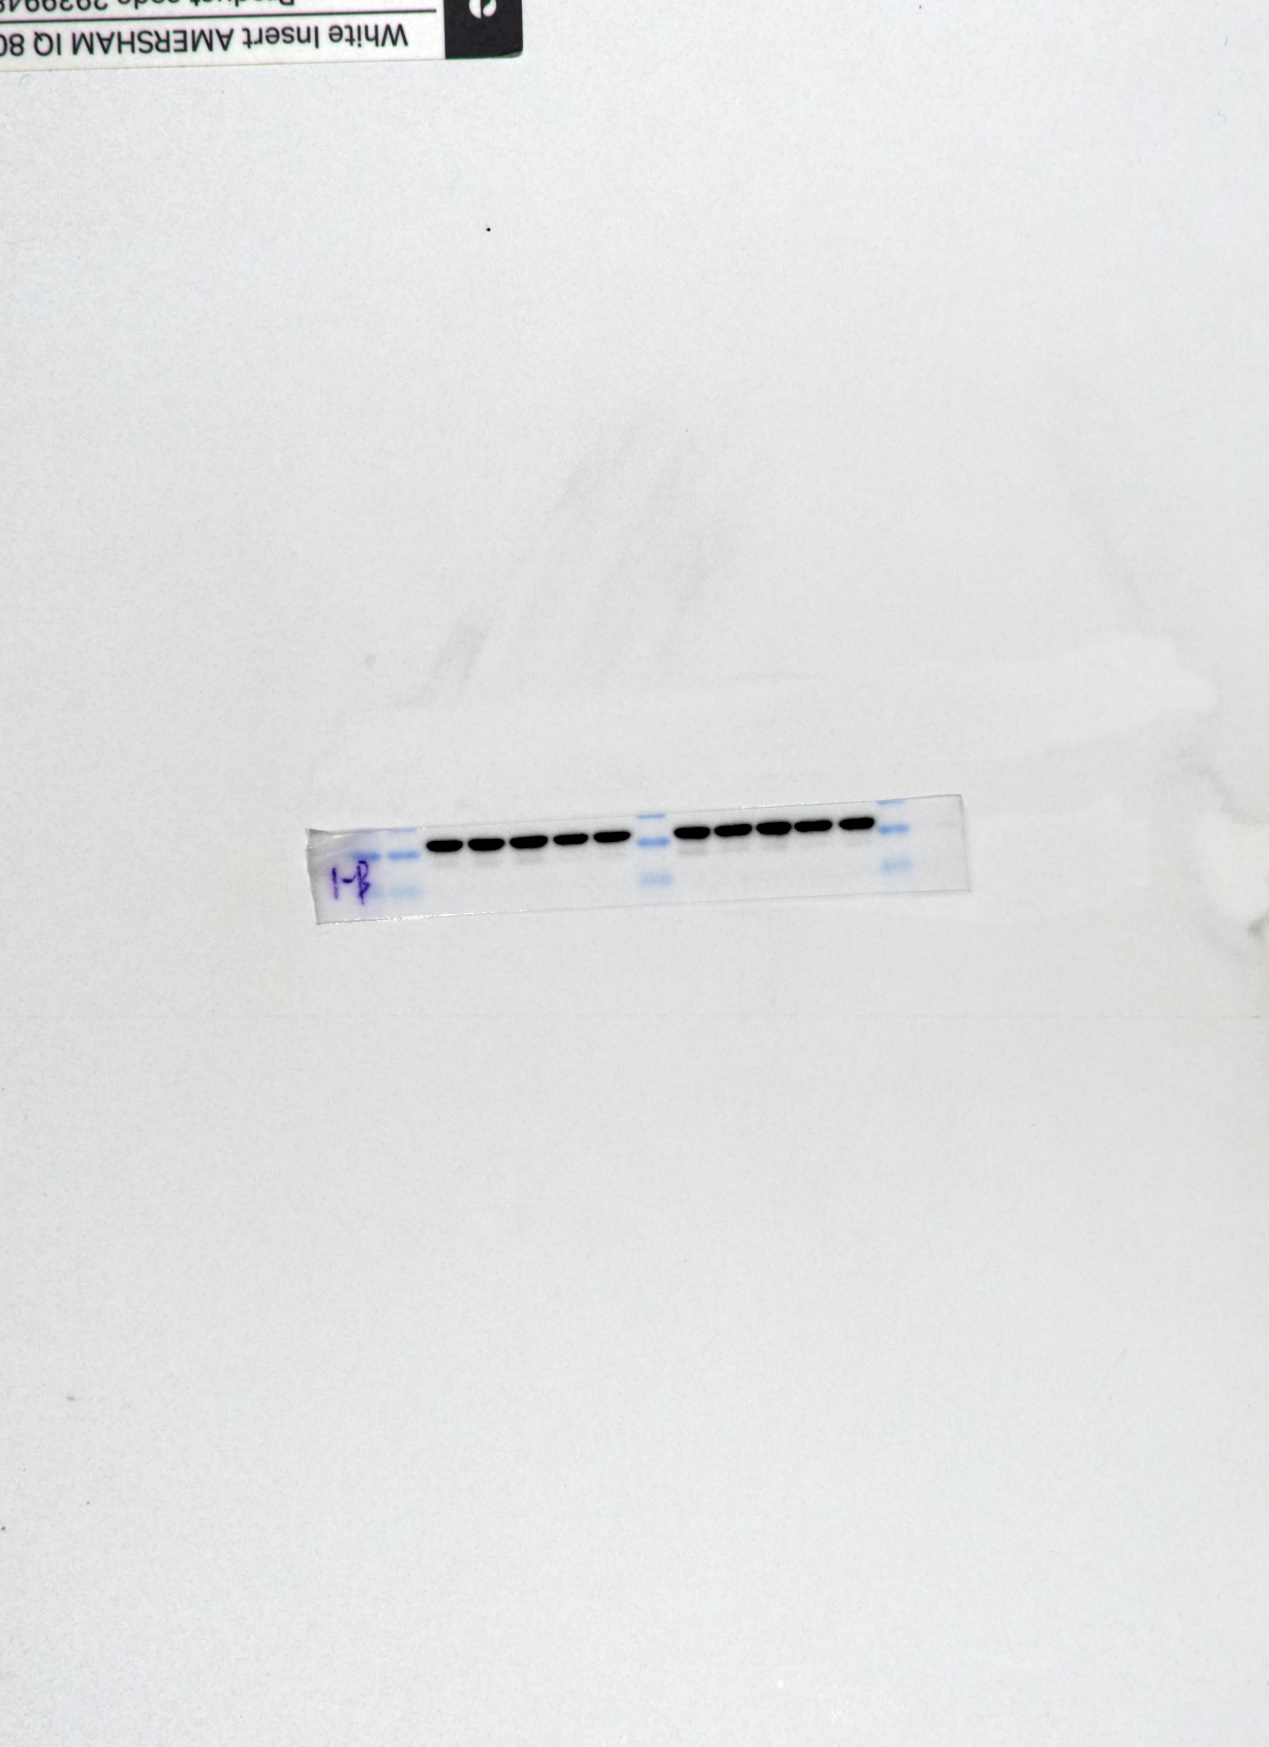


β-actin 42KDa


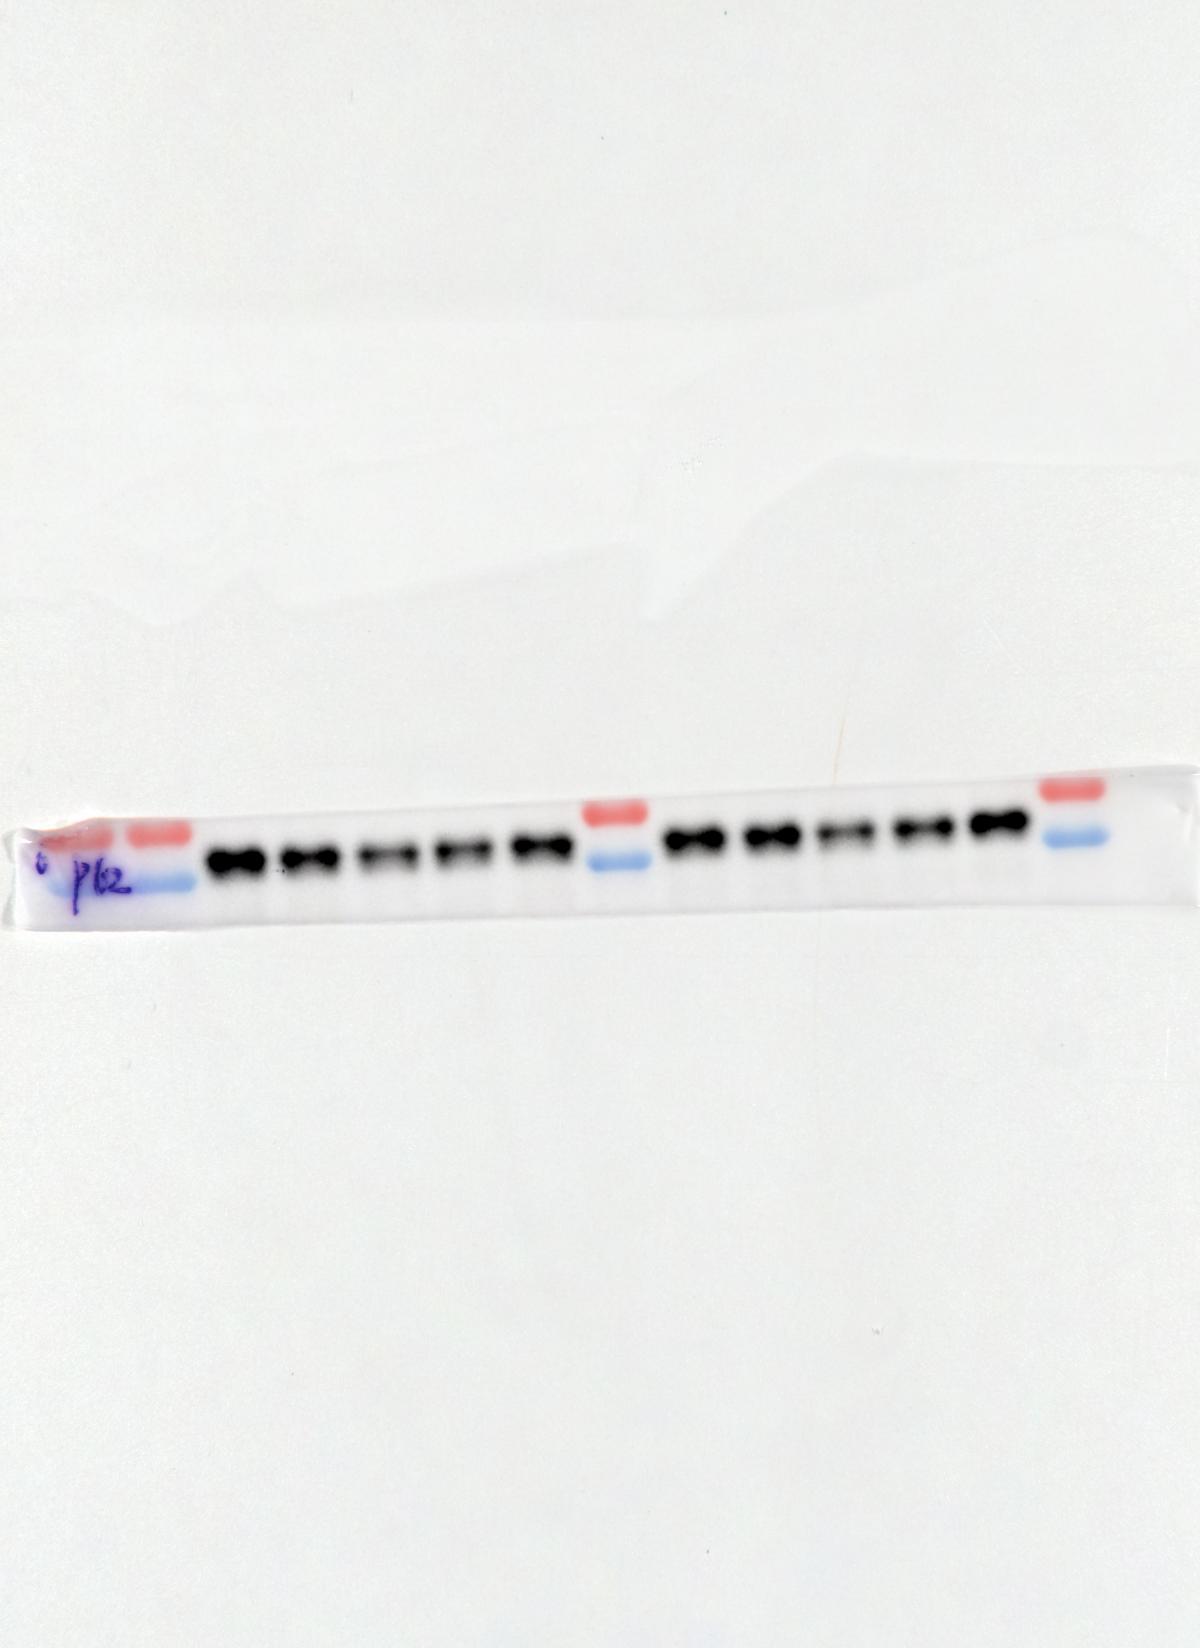


P62 62KDa


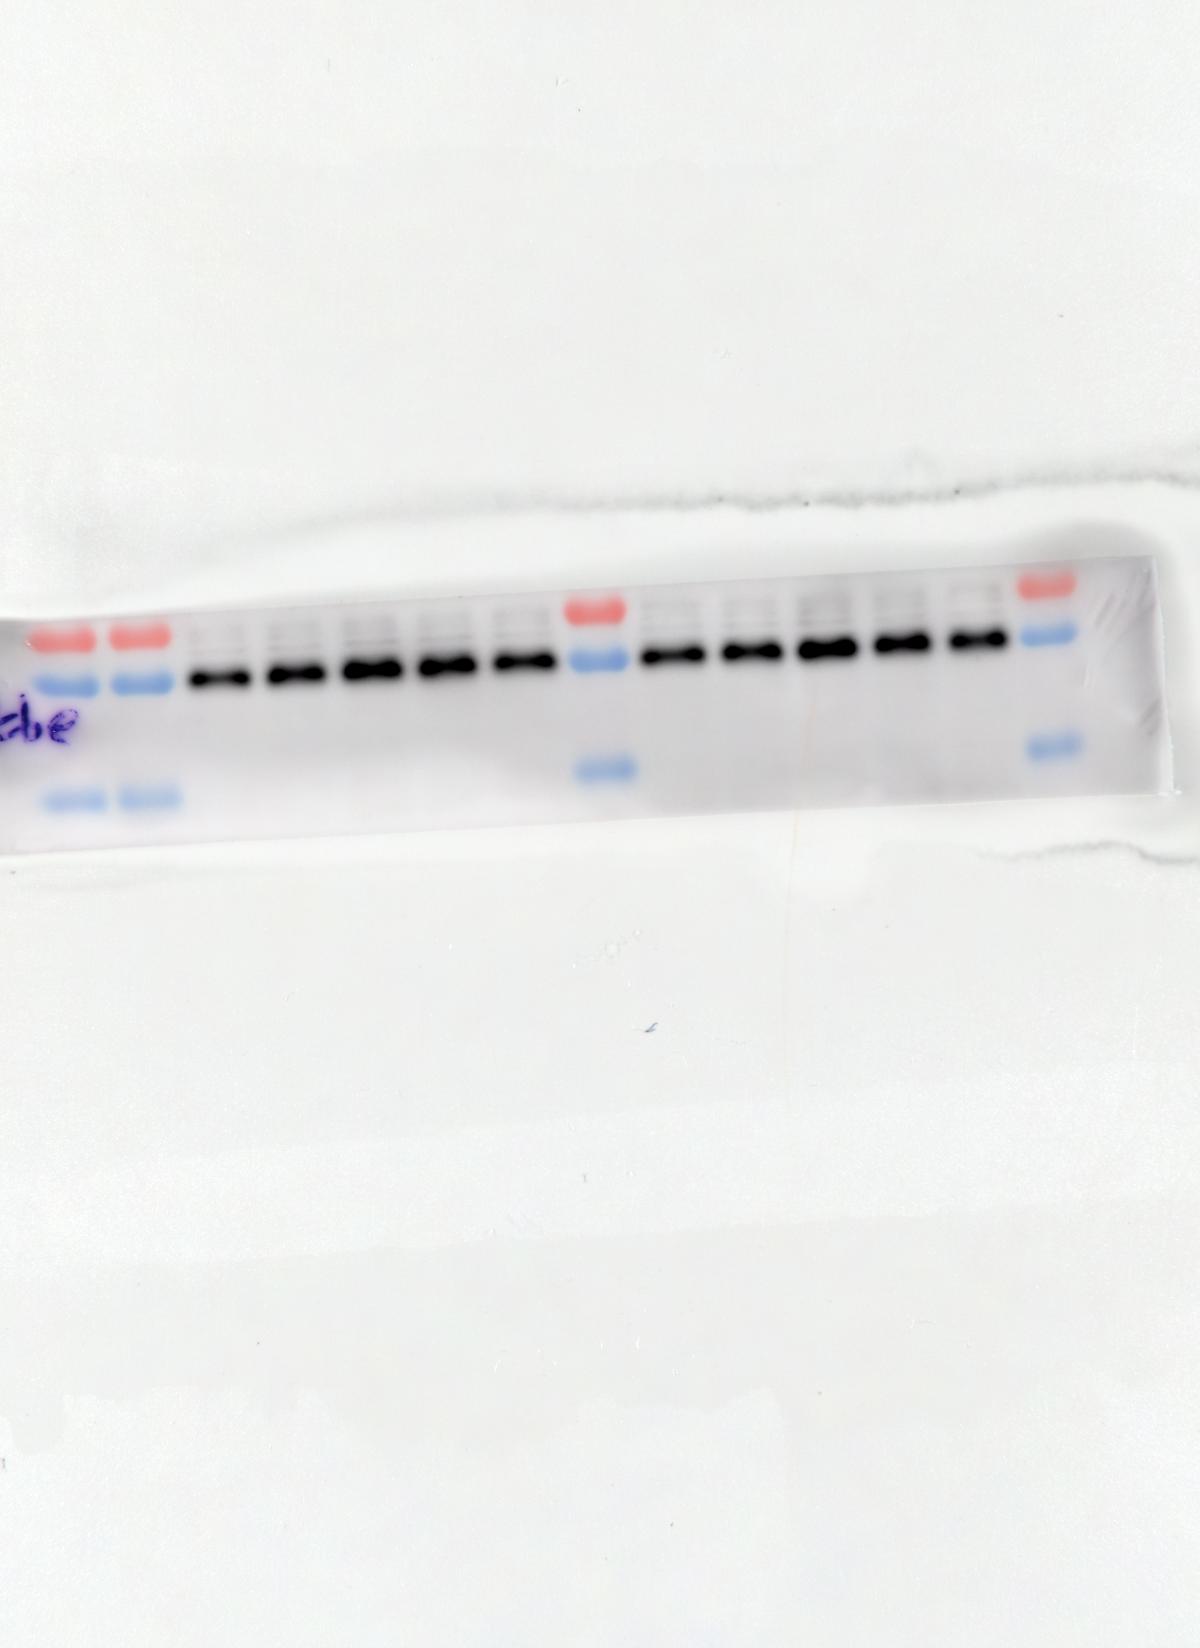


Beclin1 60KDa


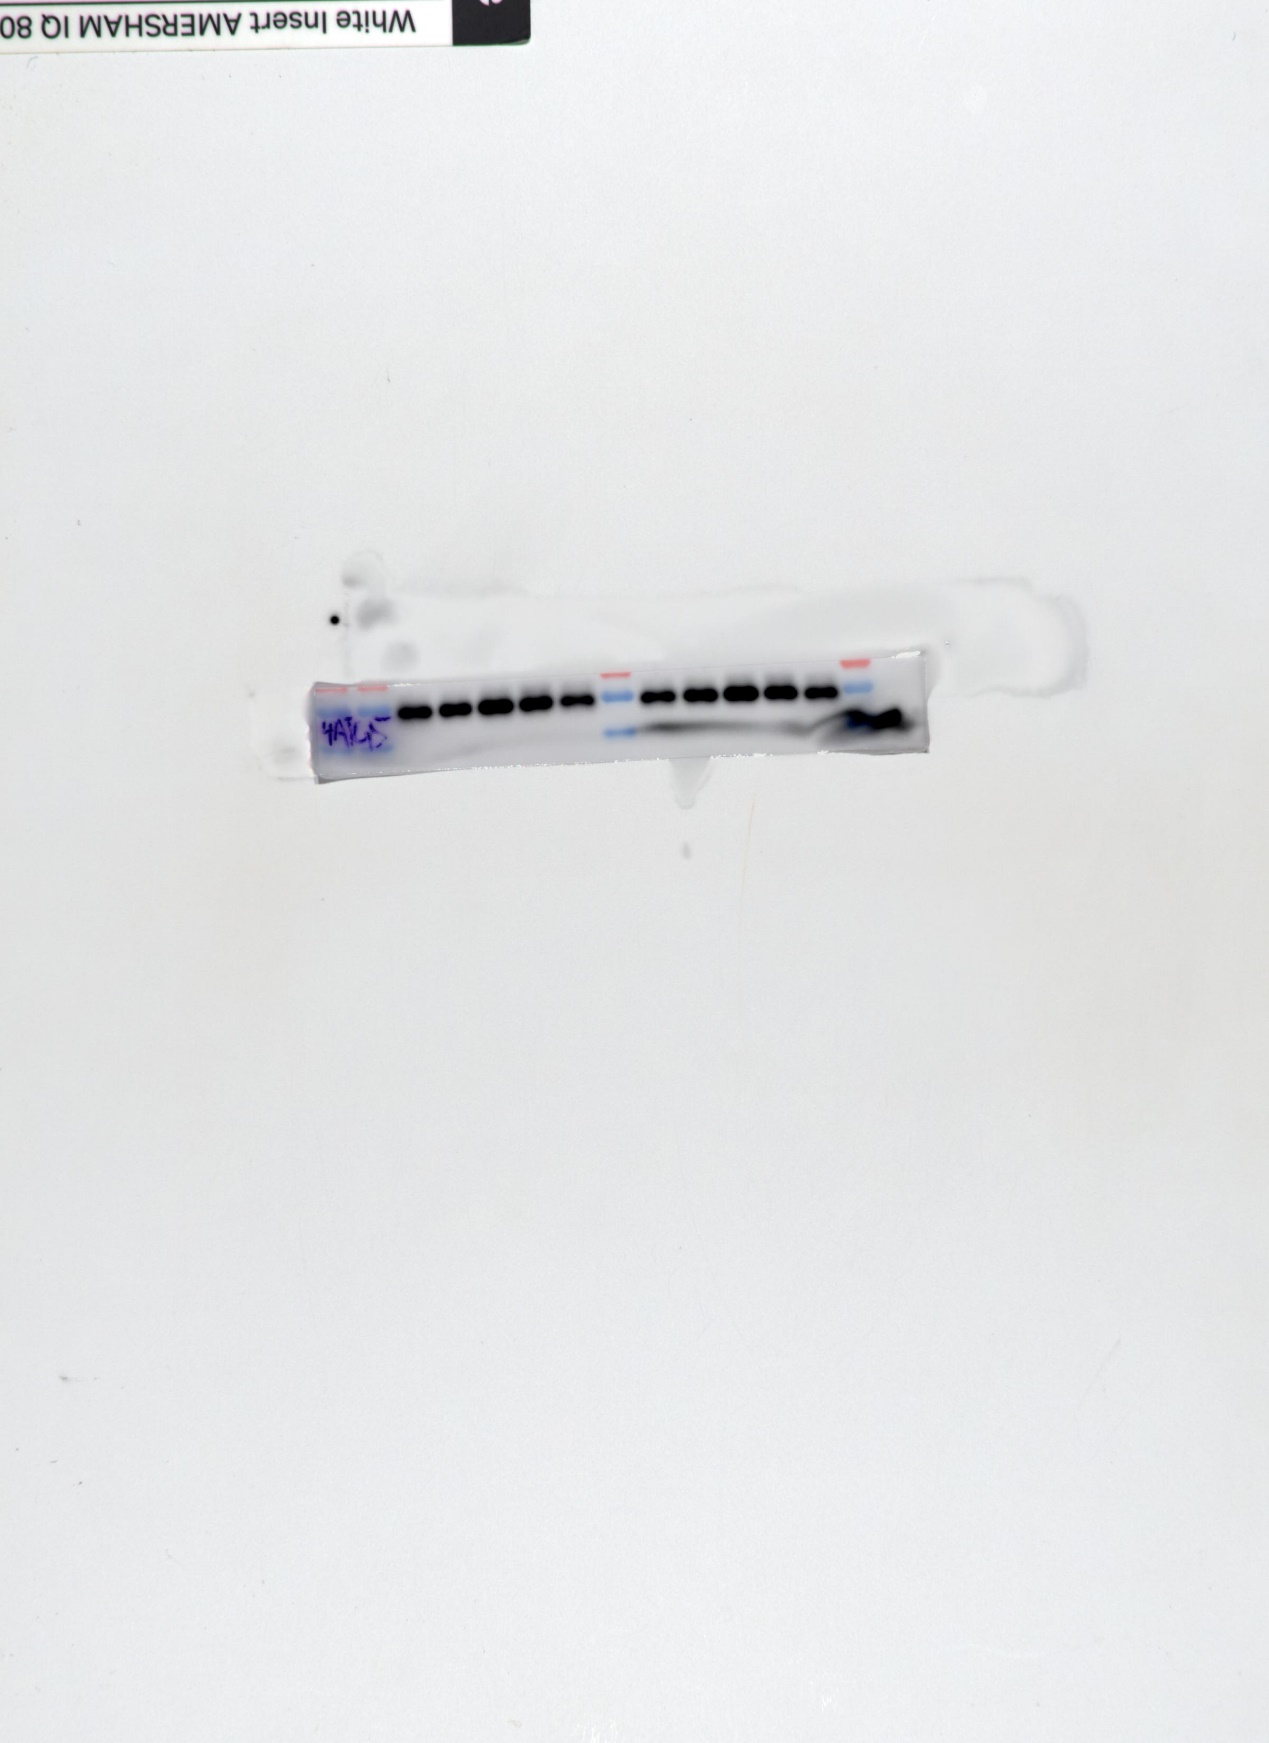


ATG5 55KDa


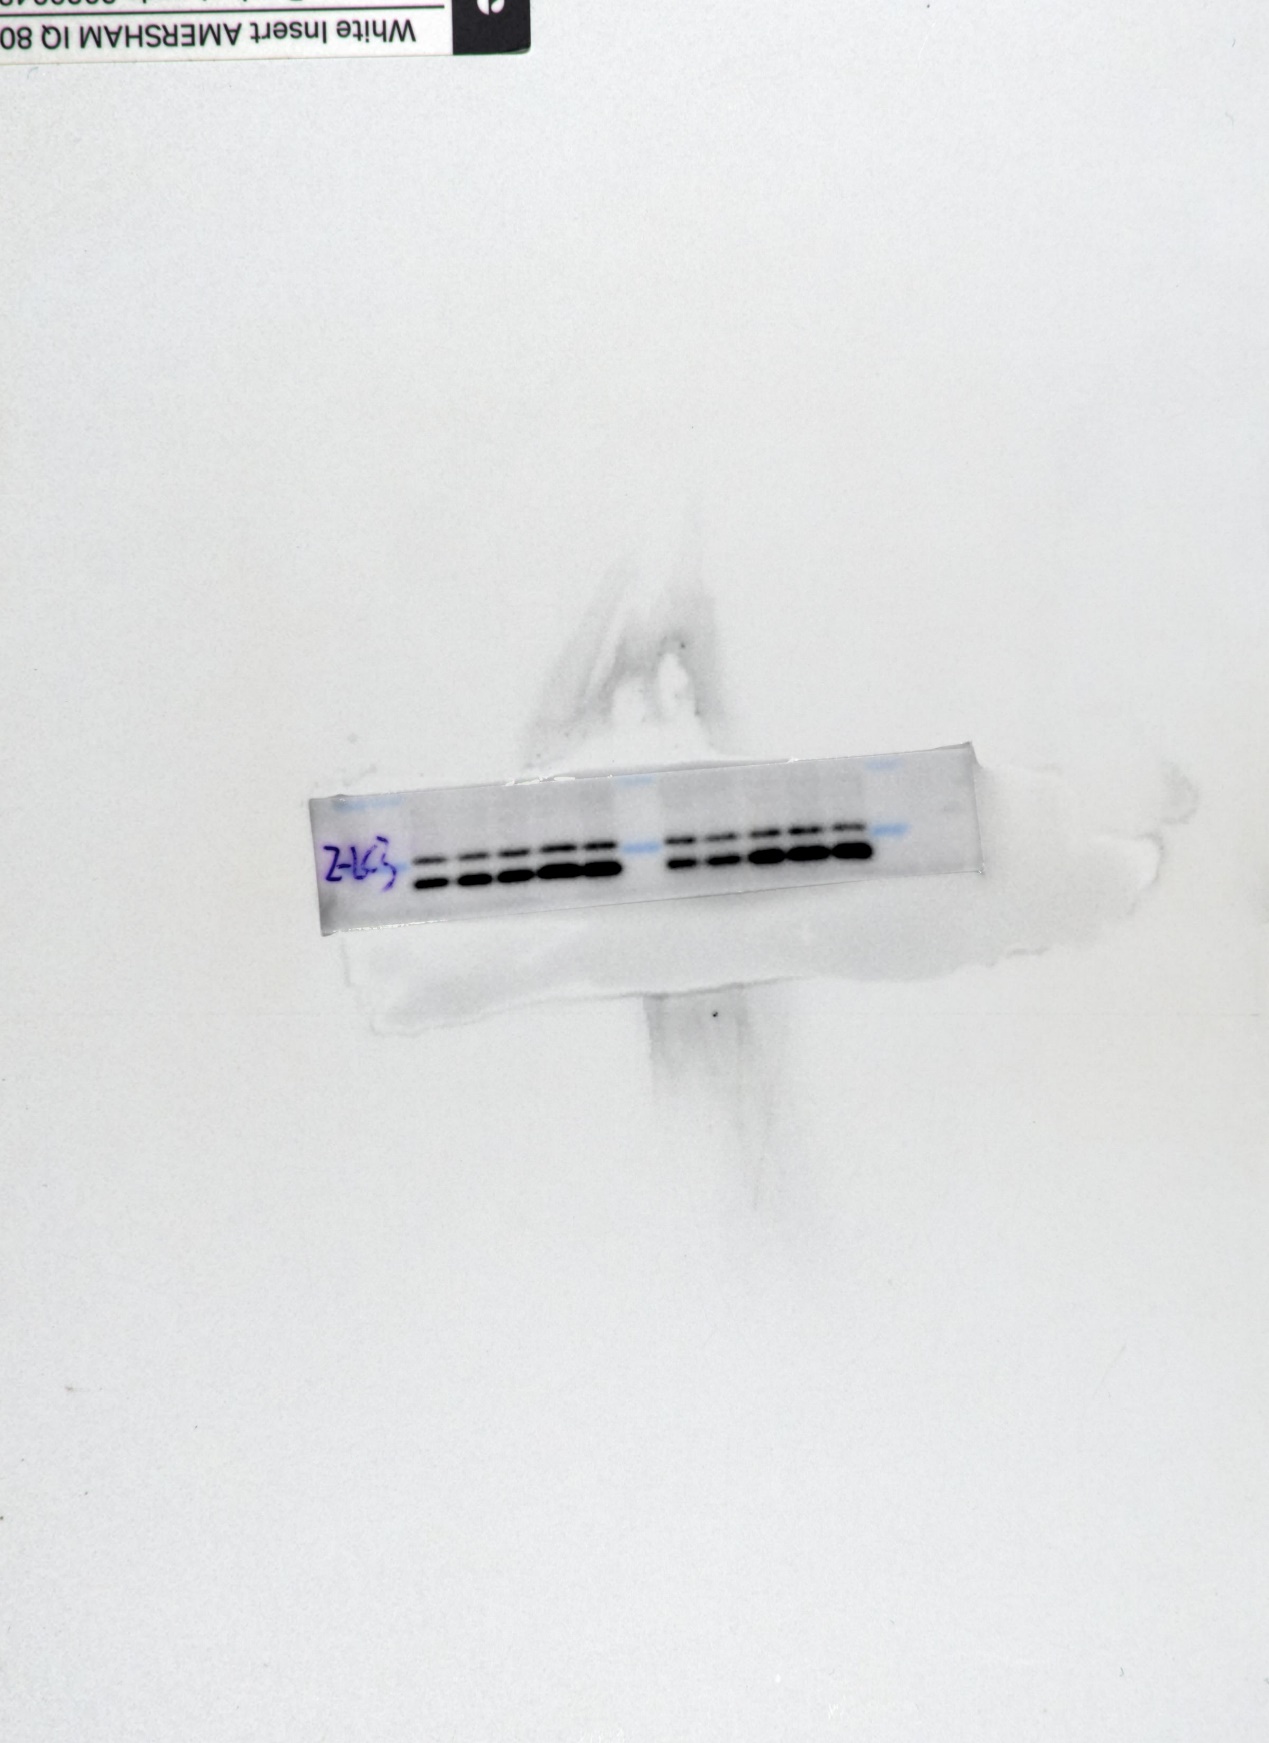


LC3B 14KDa


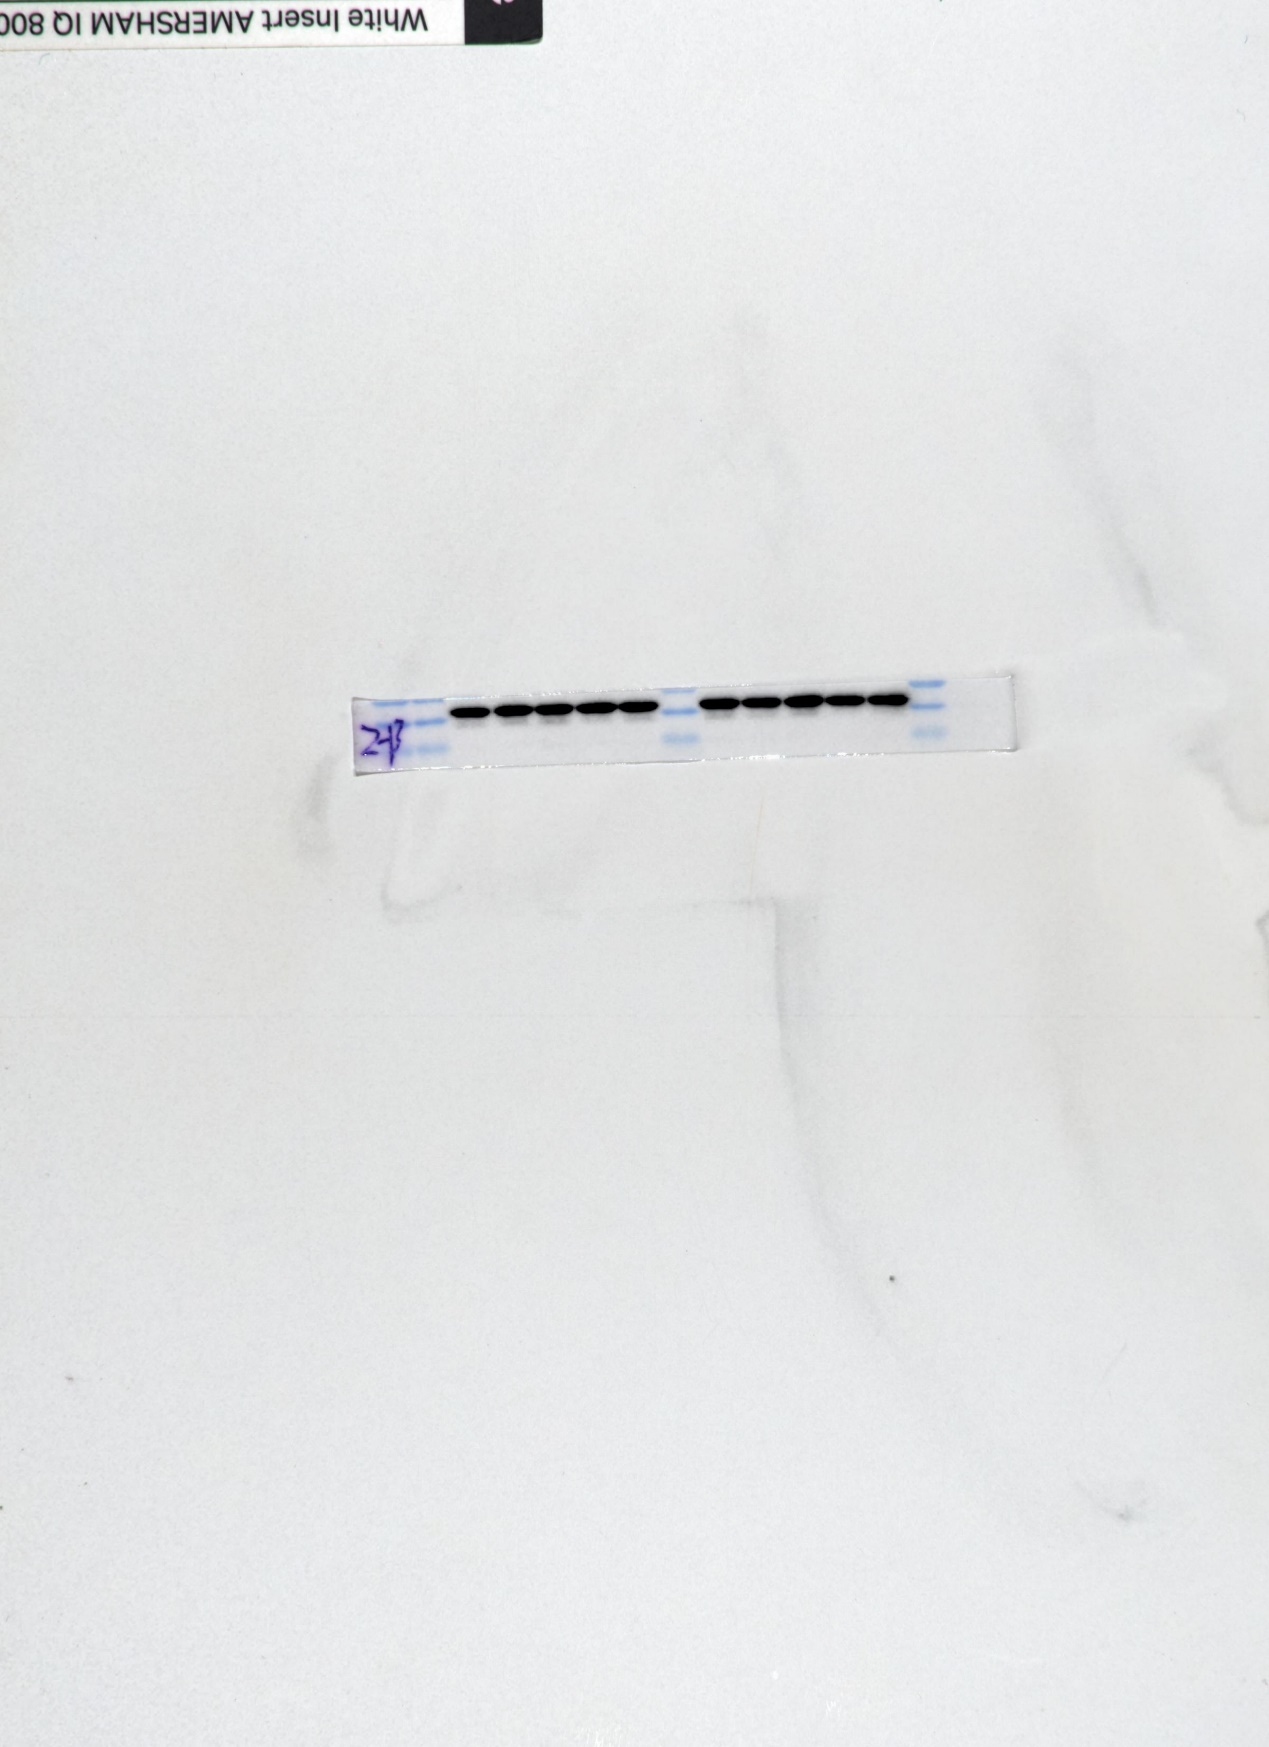


β-actin 42KDa

Figure 5. ARC-18 improved autophagic dysfunction in N2a/APPswe cells. (A) Original strip of western blot in autophagy pathways. Please refer to the manuscript for specific grouping and experimental conditions (n=4).
