# Supplementary material for: A novel arctigenin derivative ameliorates memory impairment and pathologies by activating adiponectin receptor 1-mediated autophagy and regulating amyloid precursor protein processing of Alzheimer's disease
Source: Research Square preprint supplement (doi:10.21203/rs.3.rs-7035906/v1), 2025-08-22
Supplement: Supplementary file 2 [file 8a369f692ebfd3ba17ebf378.docx]

Figure 3A


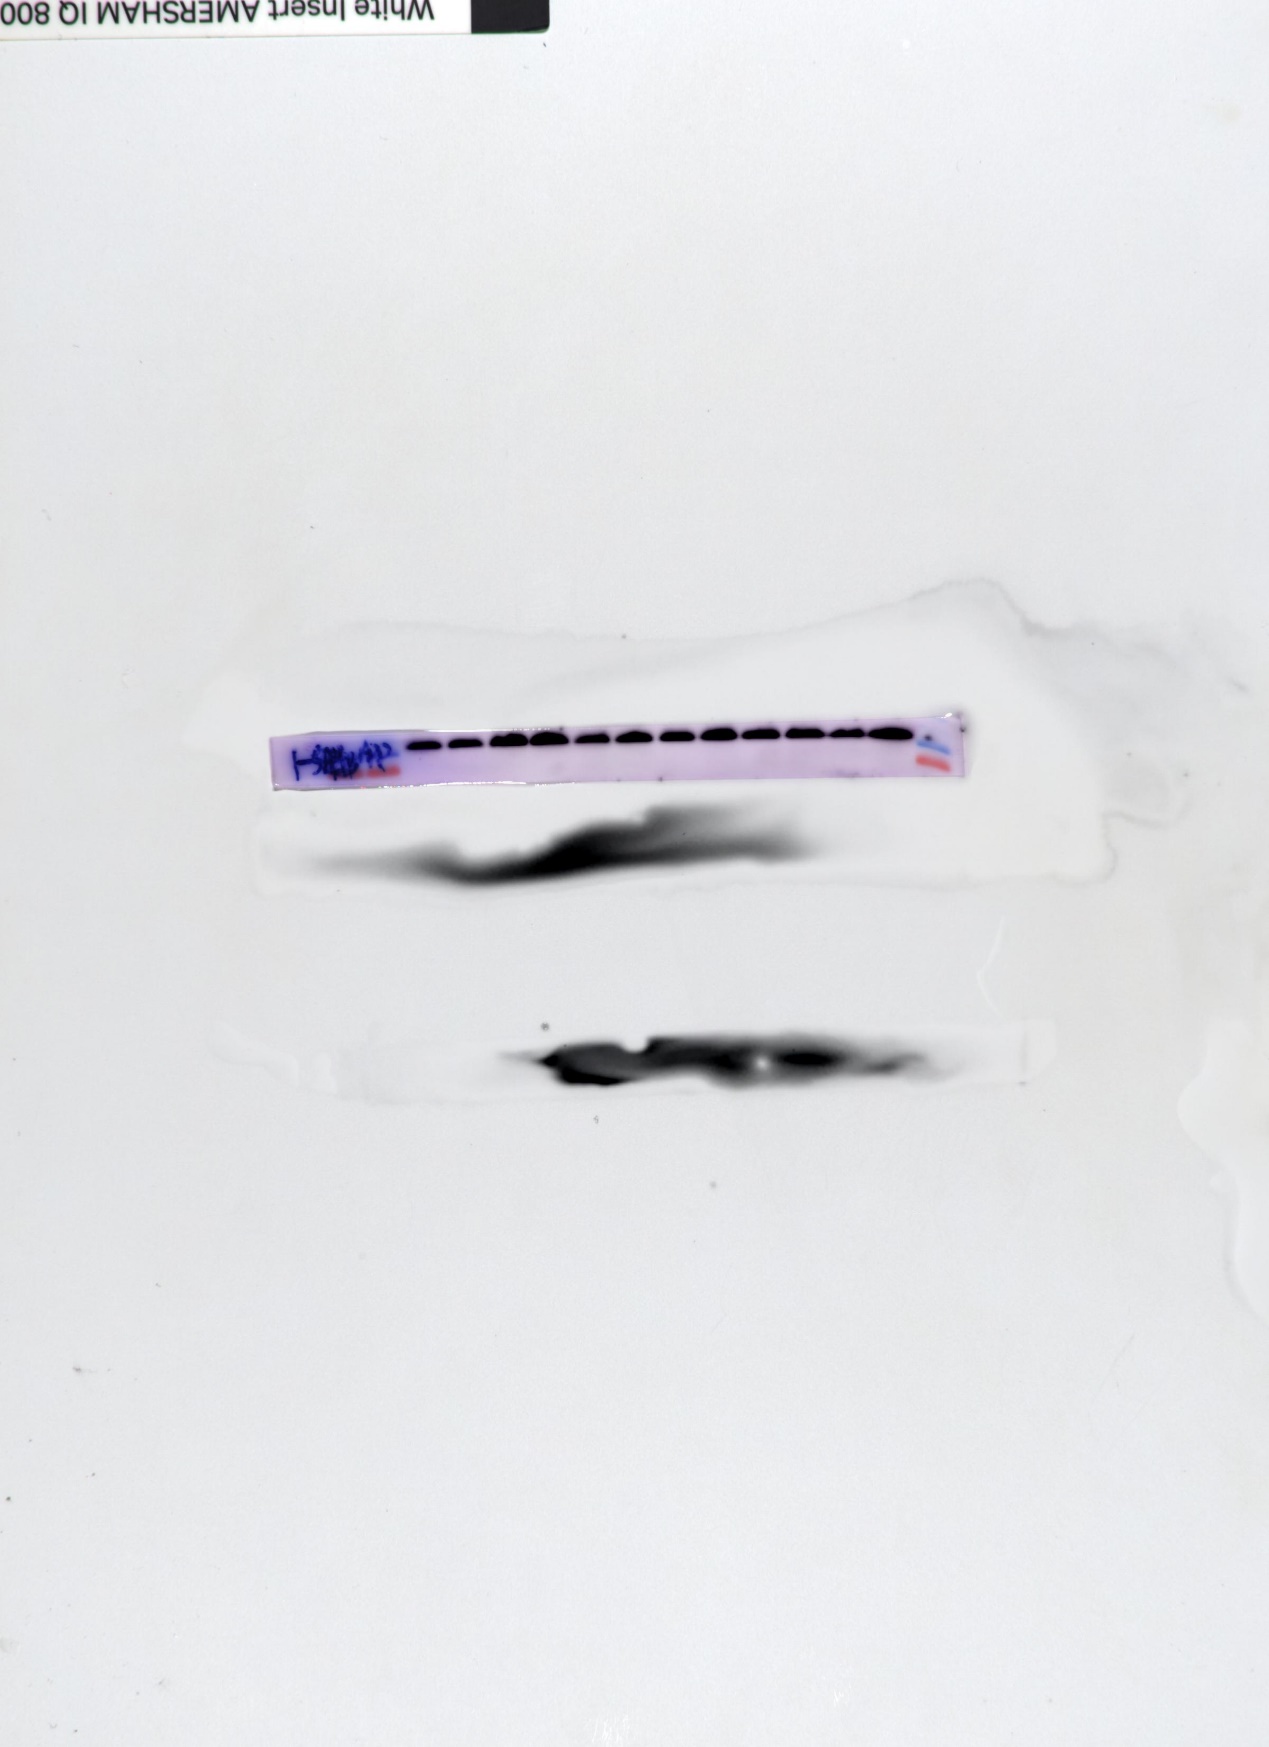


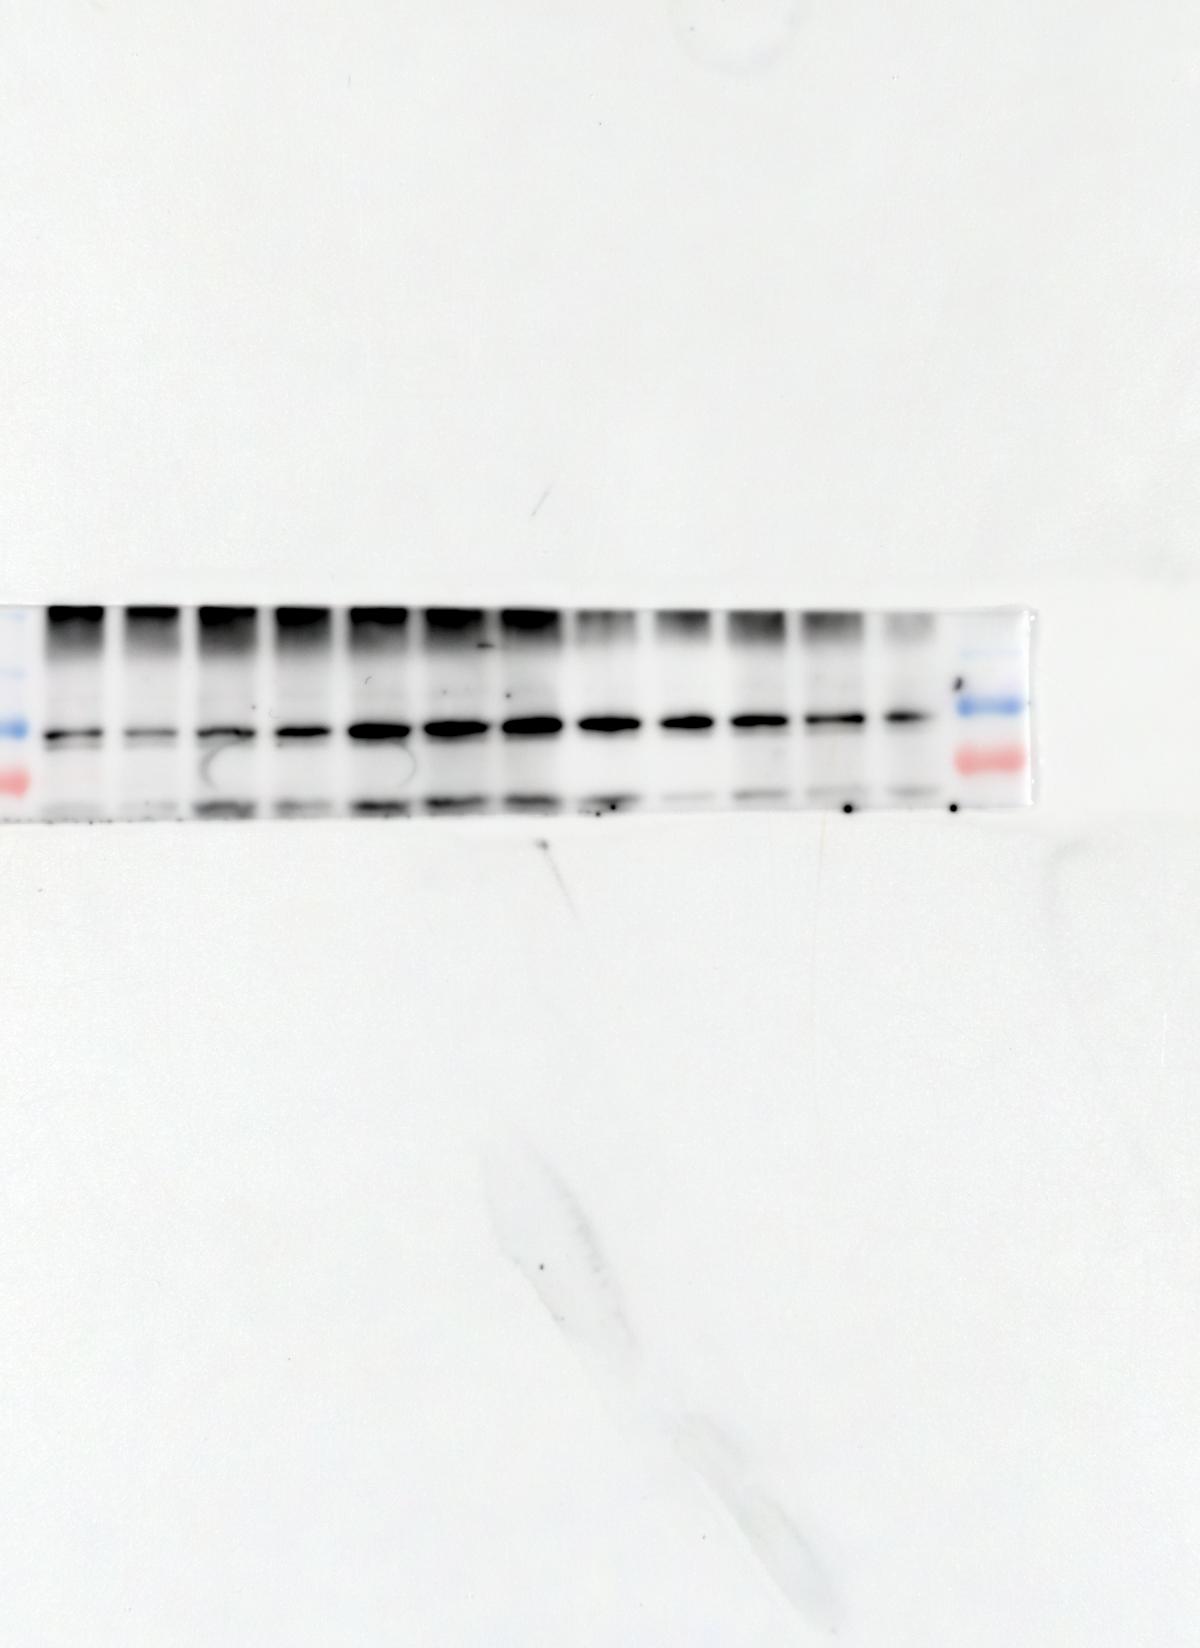
APP 110kDa

sAPPα 97kDa


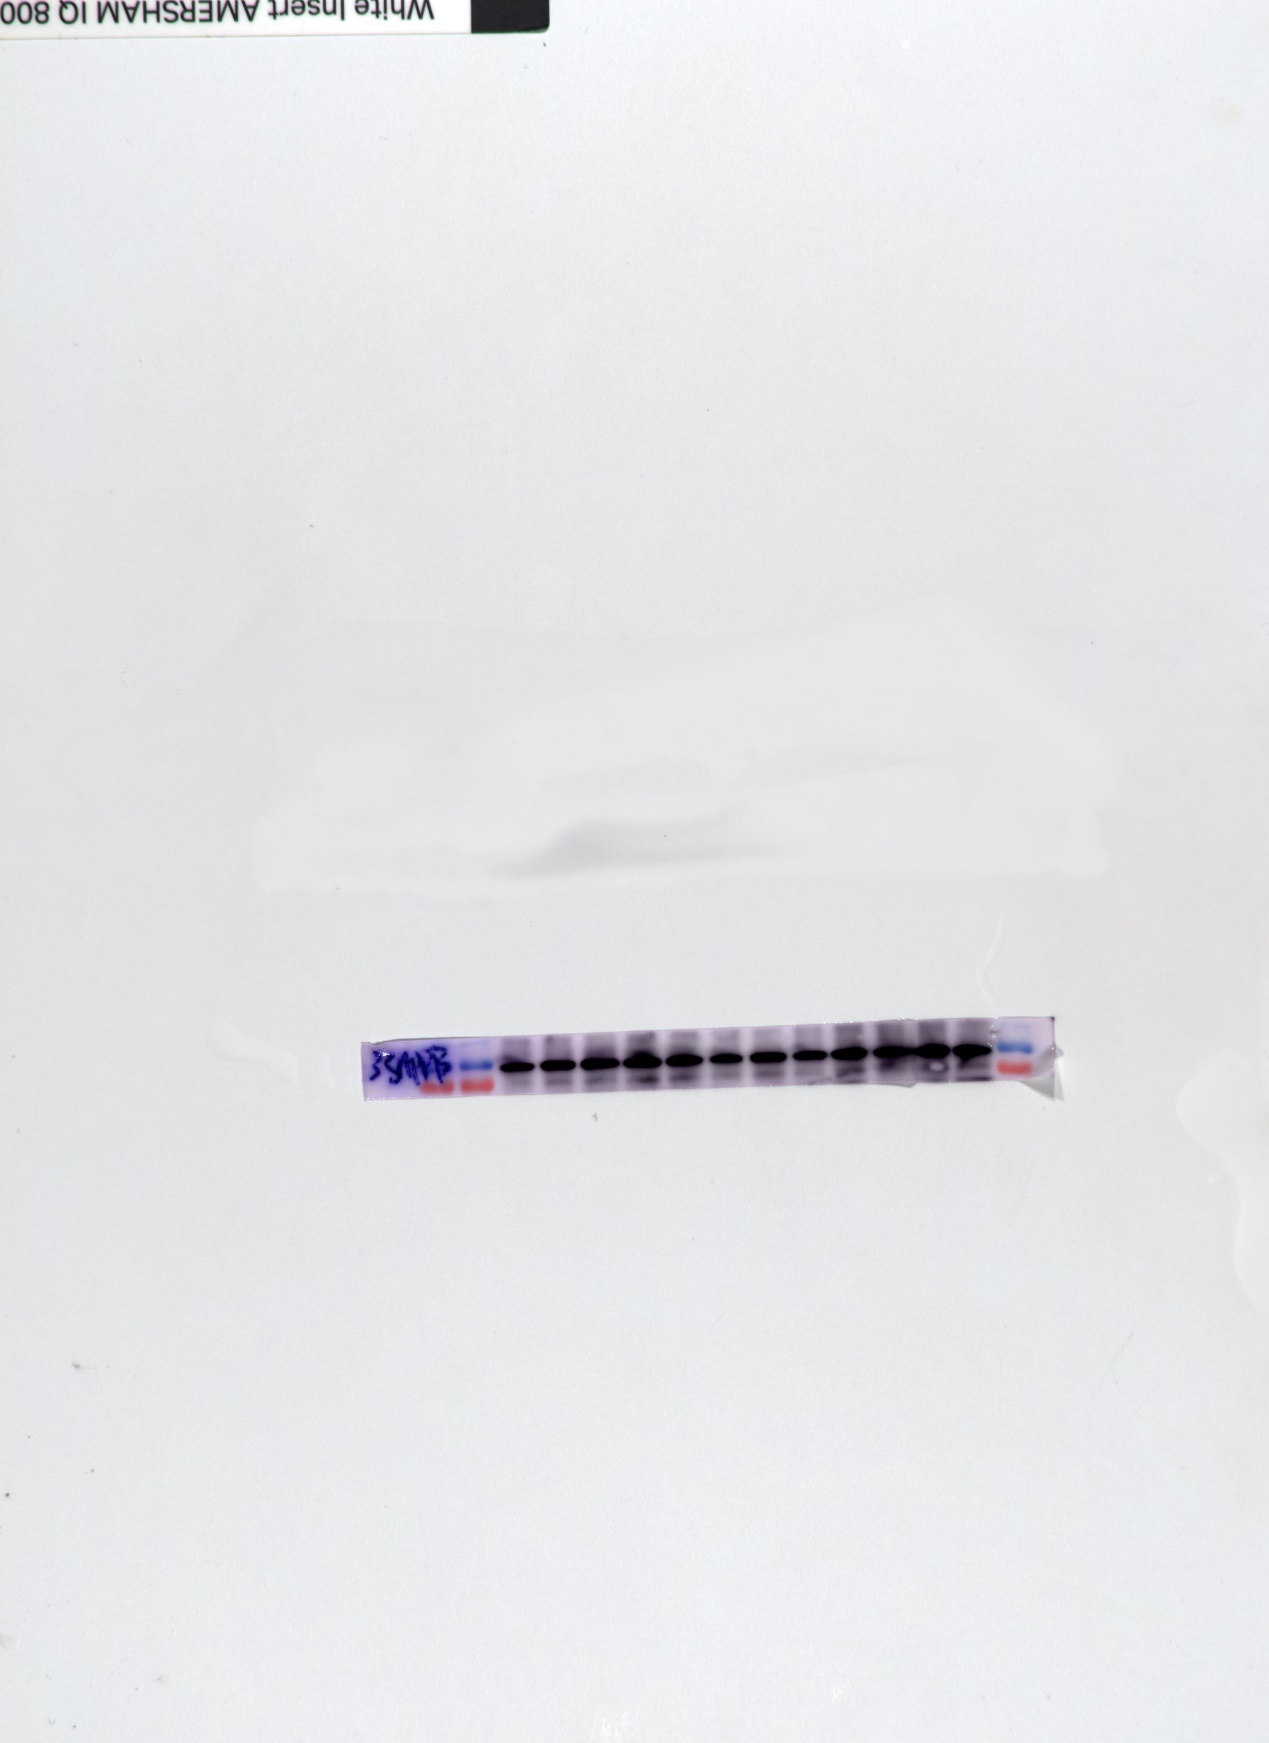


sAPPβ  97kDa


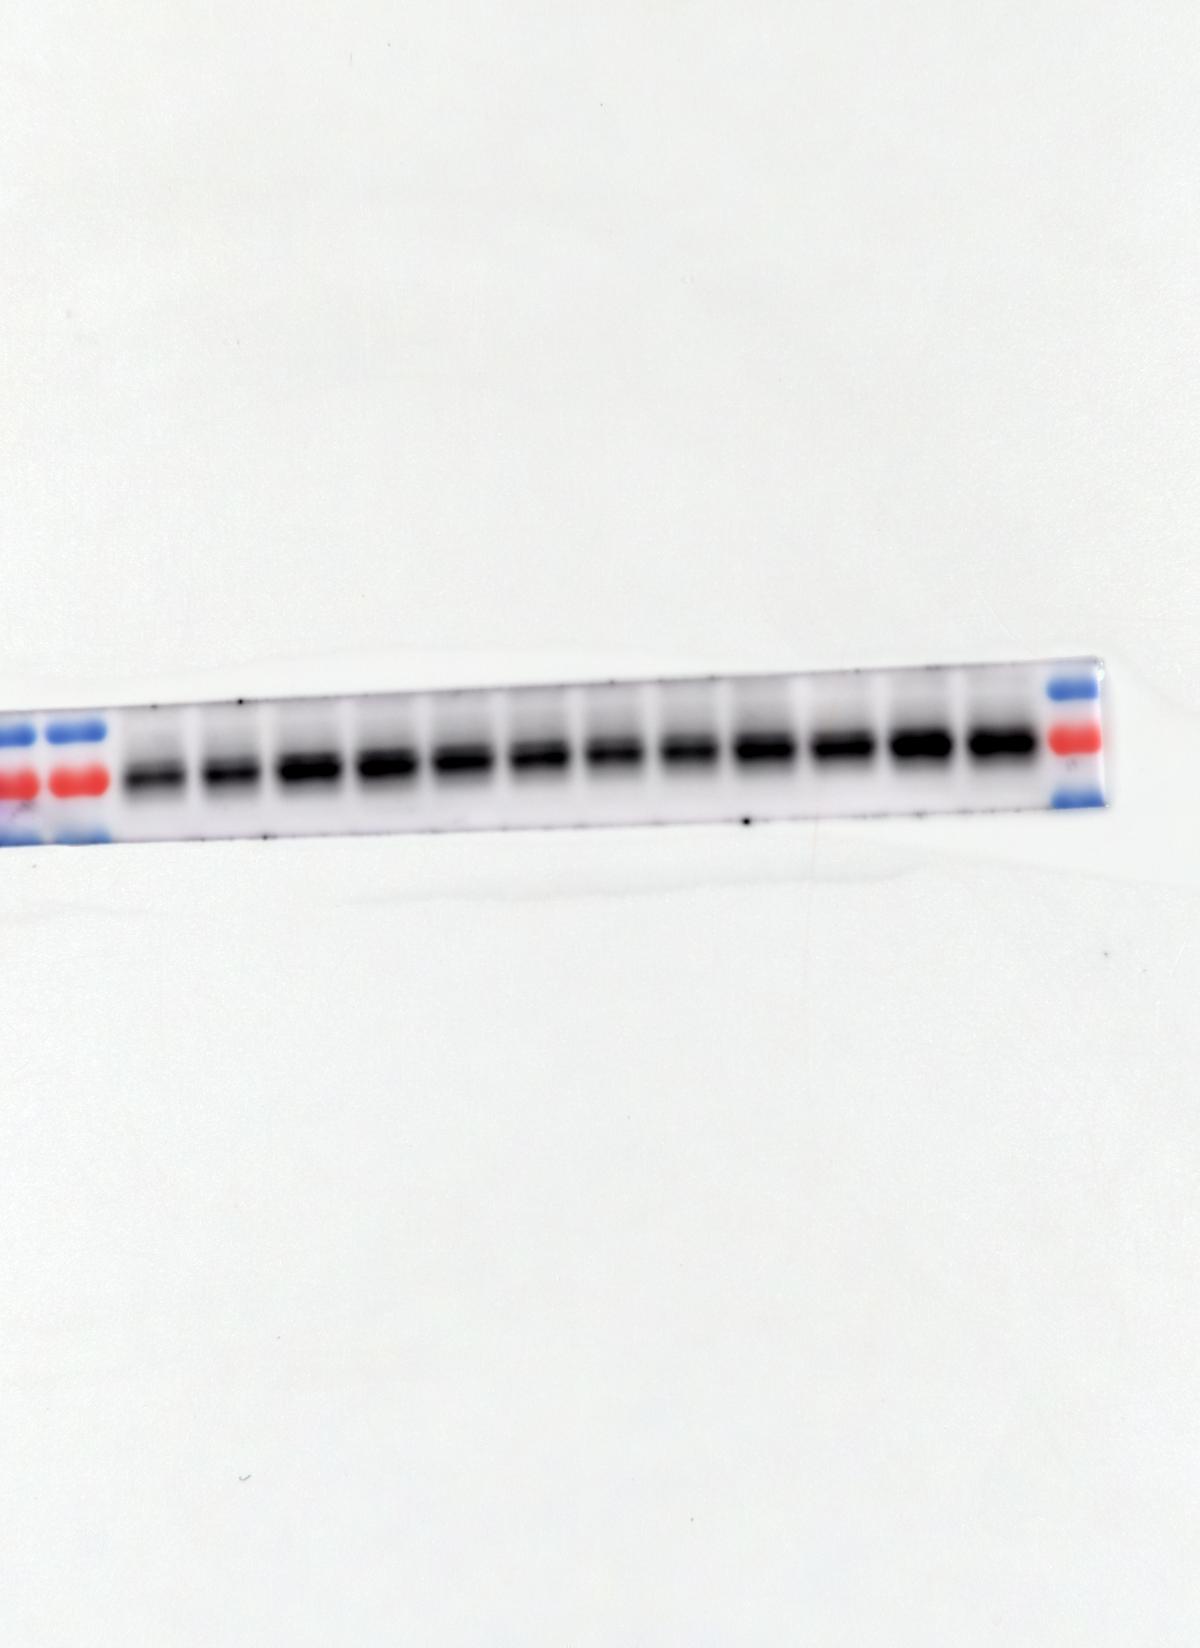


BACE1 70kDa


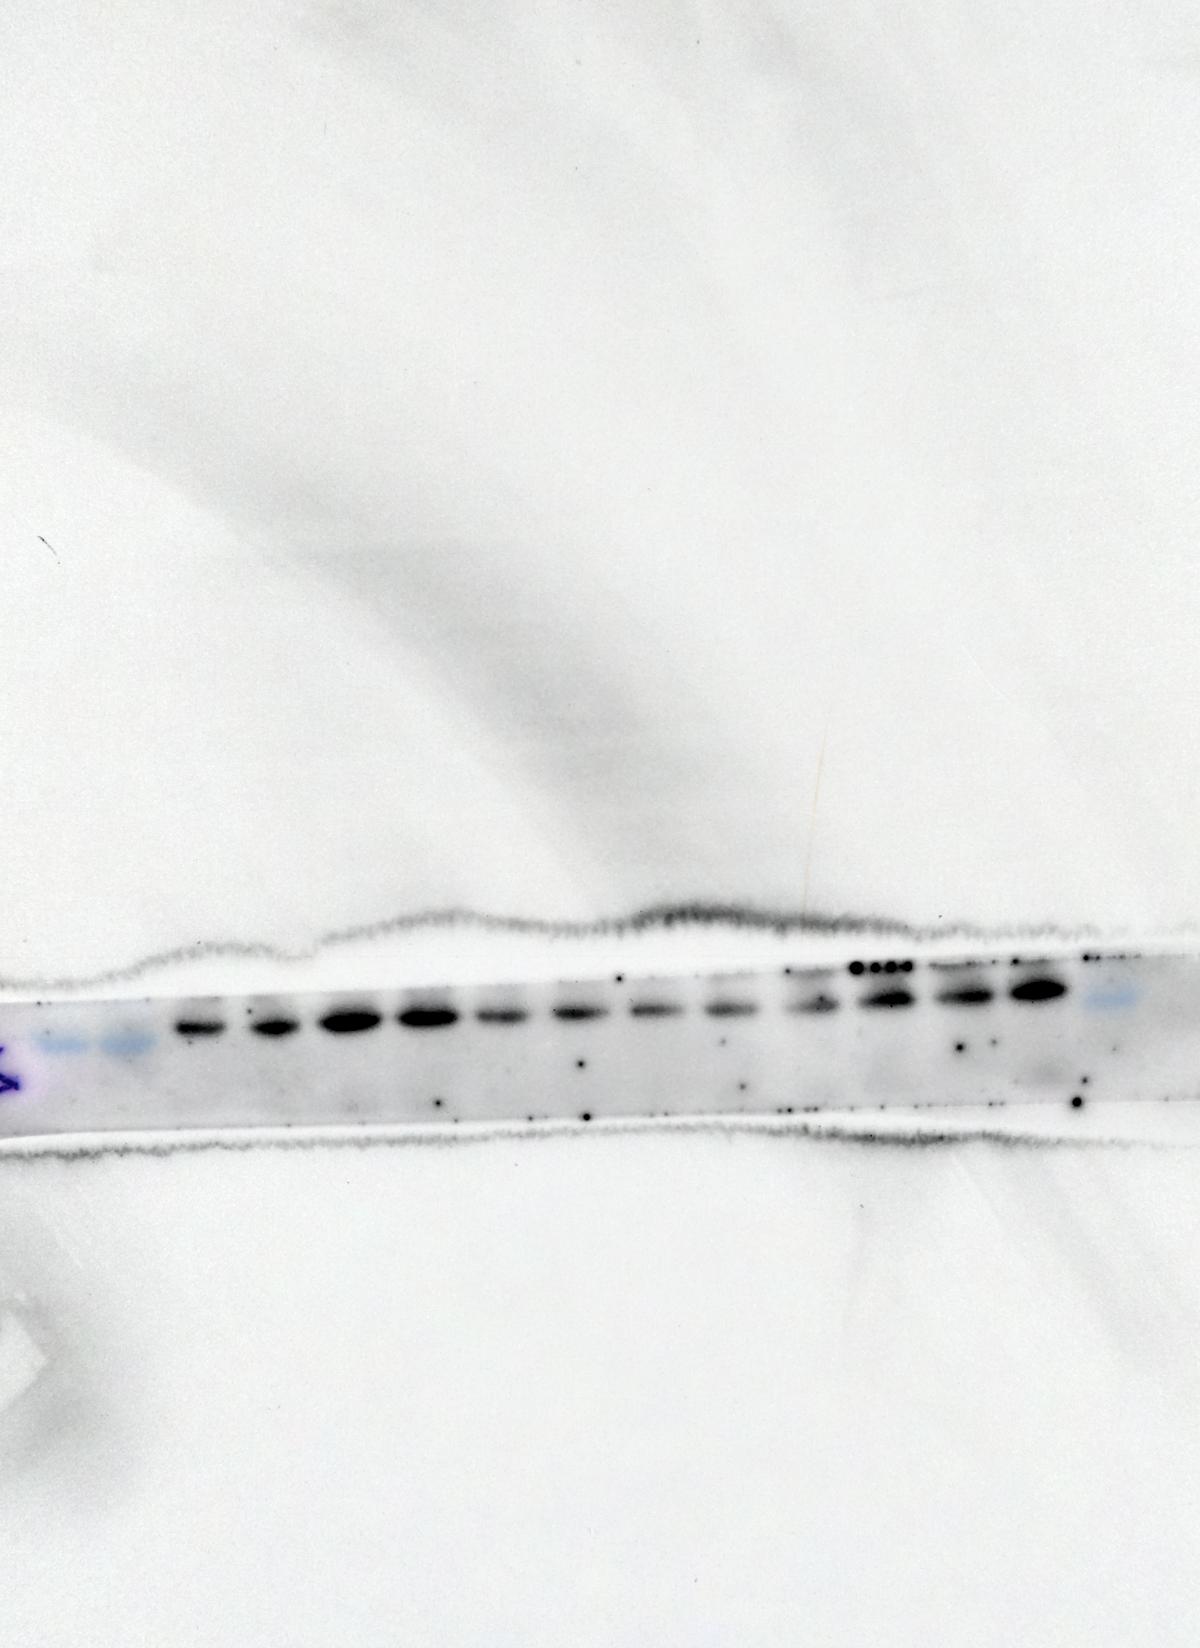


PS1 22kDa


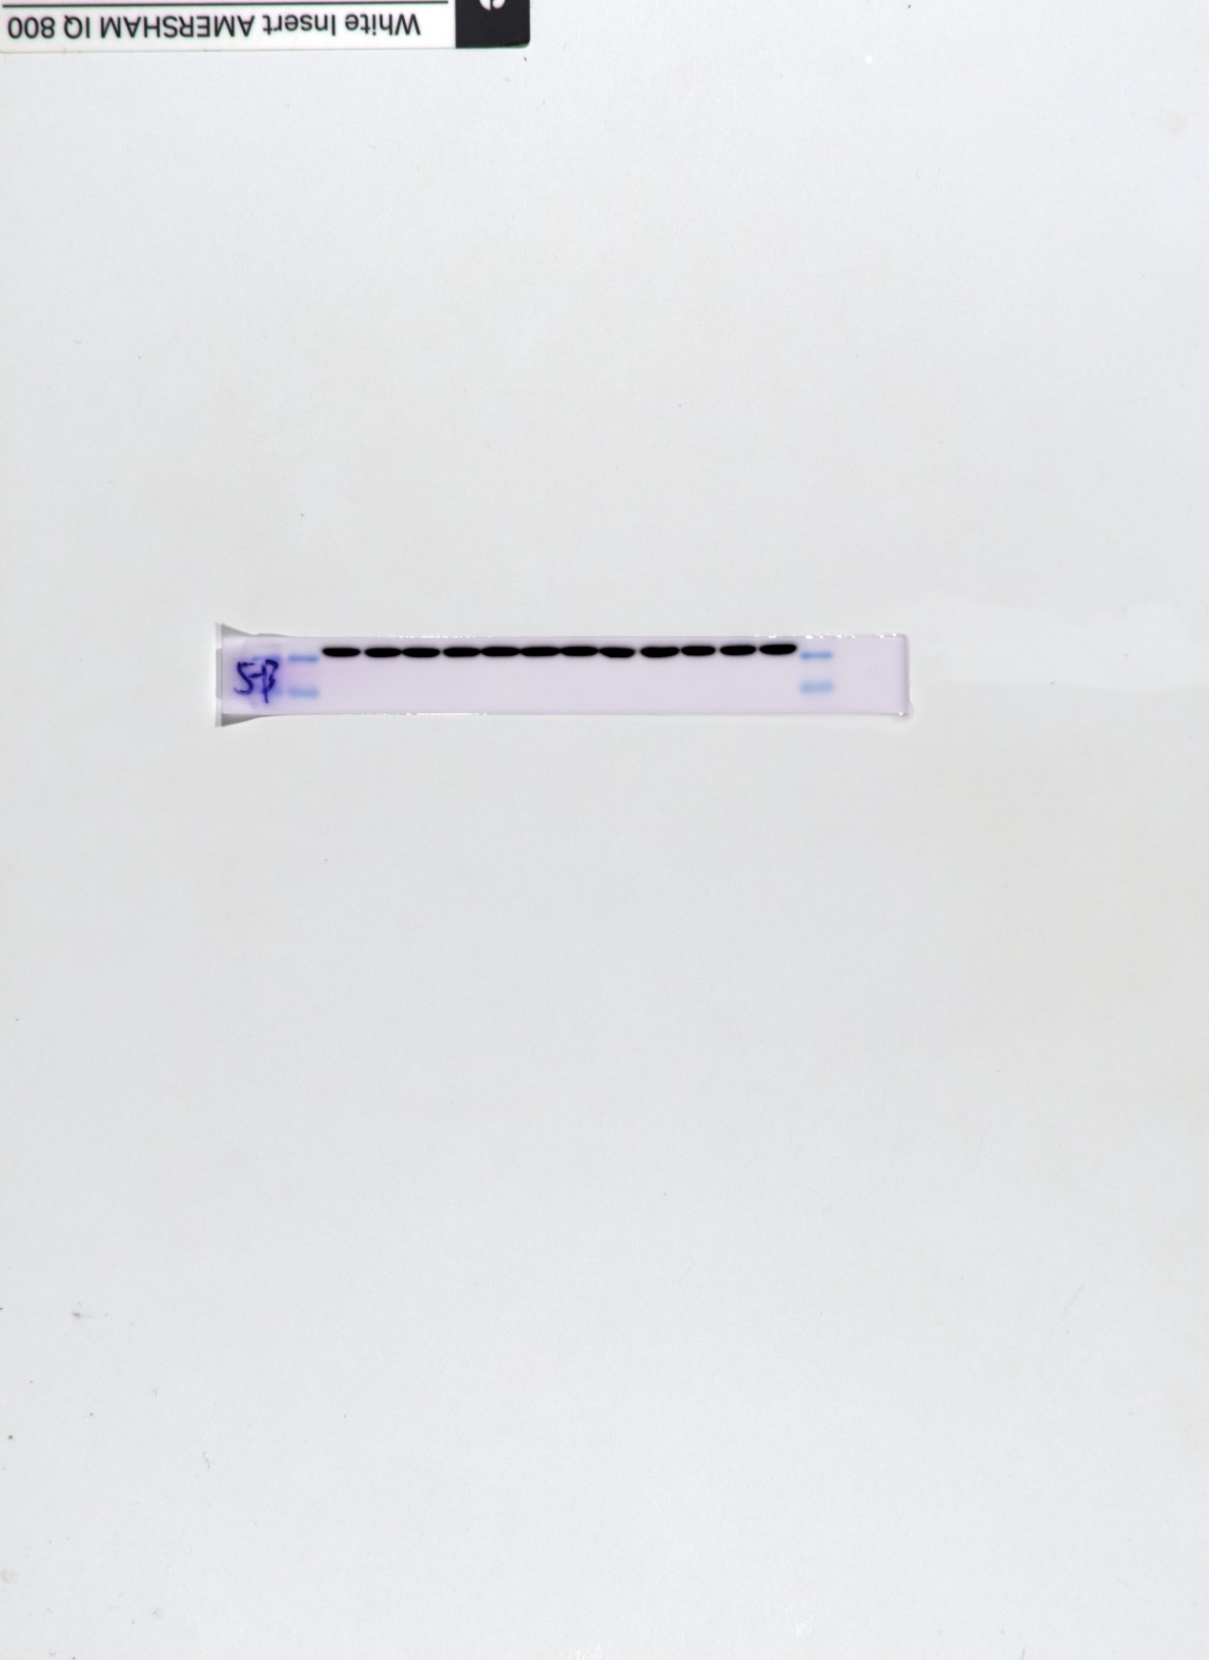


β-actin 42kDa


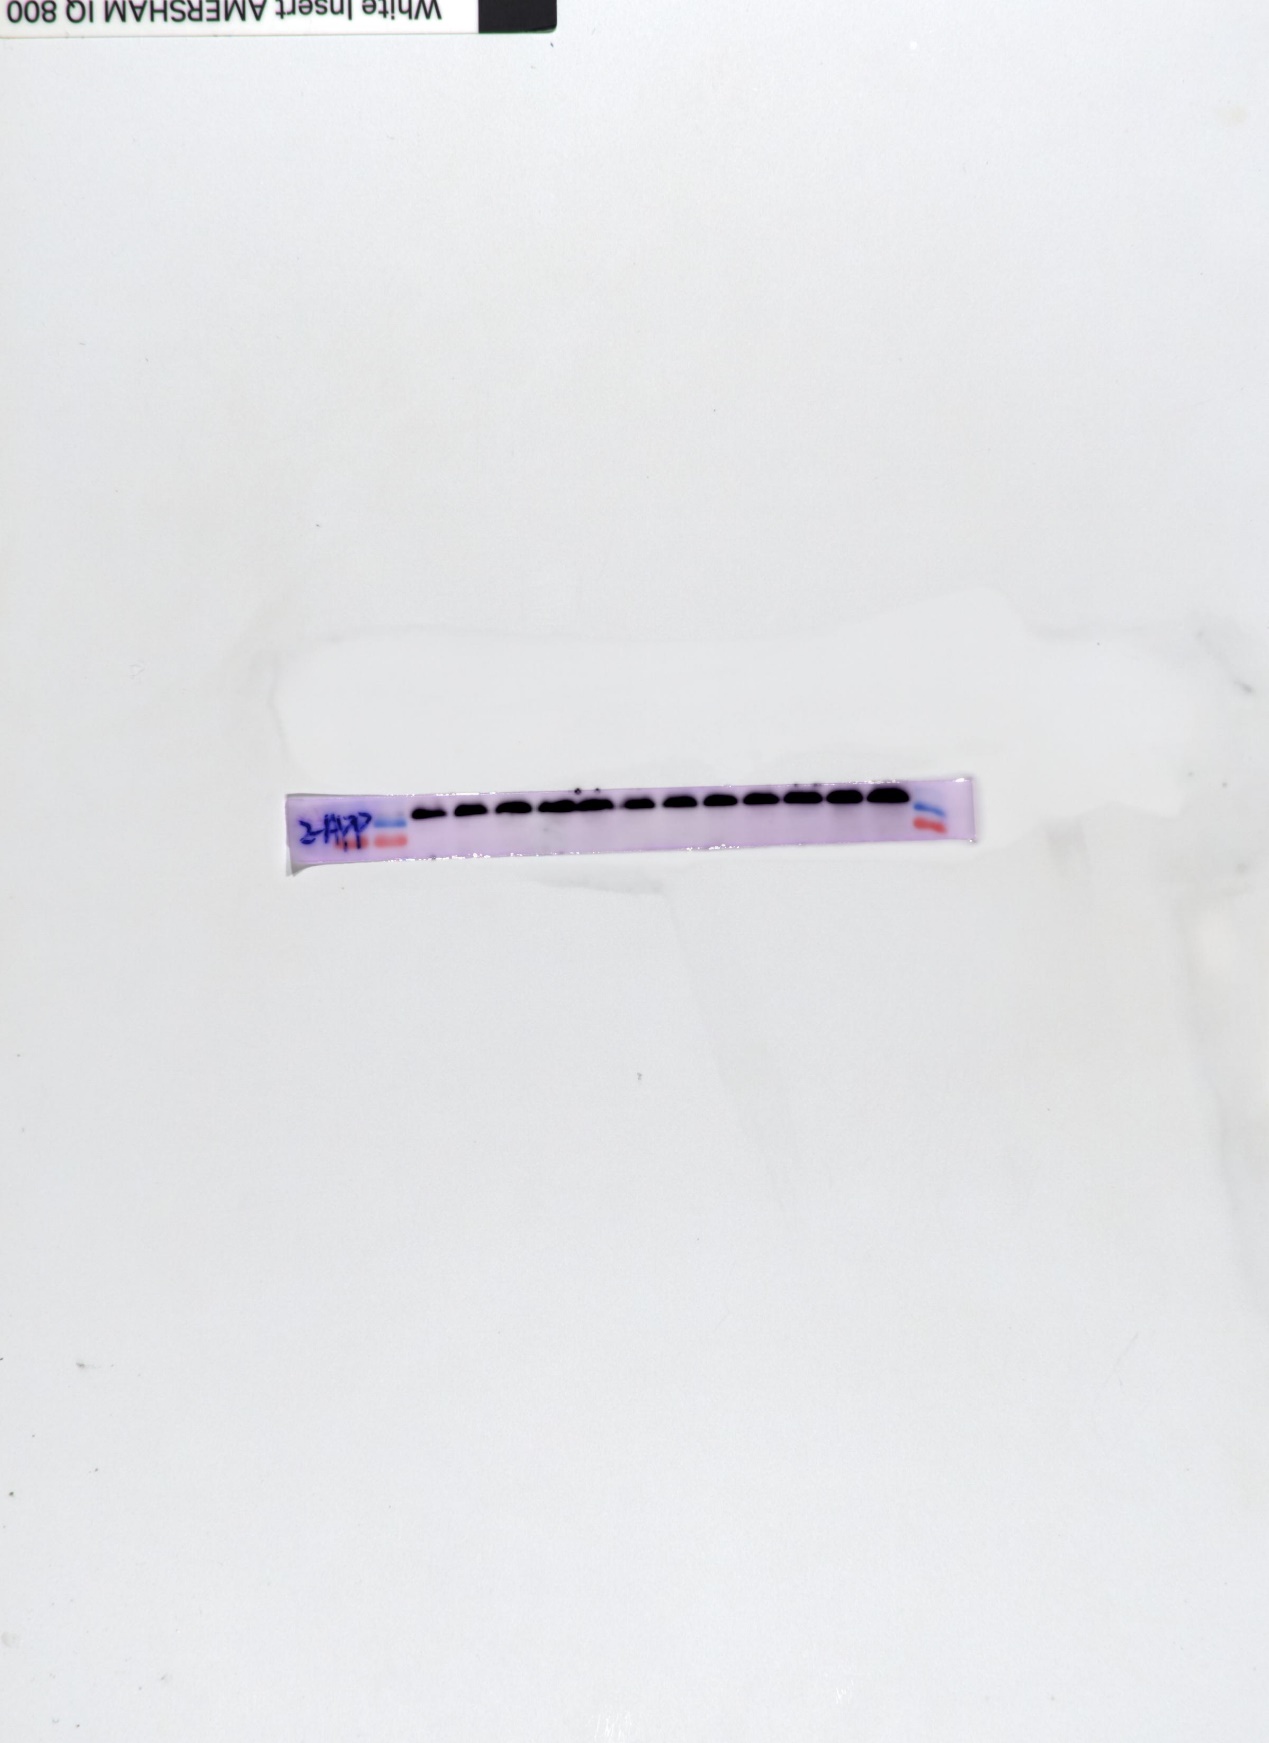


APP 110 kDa


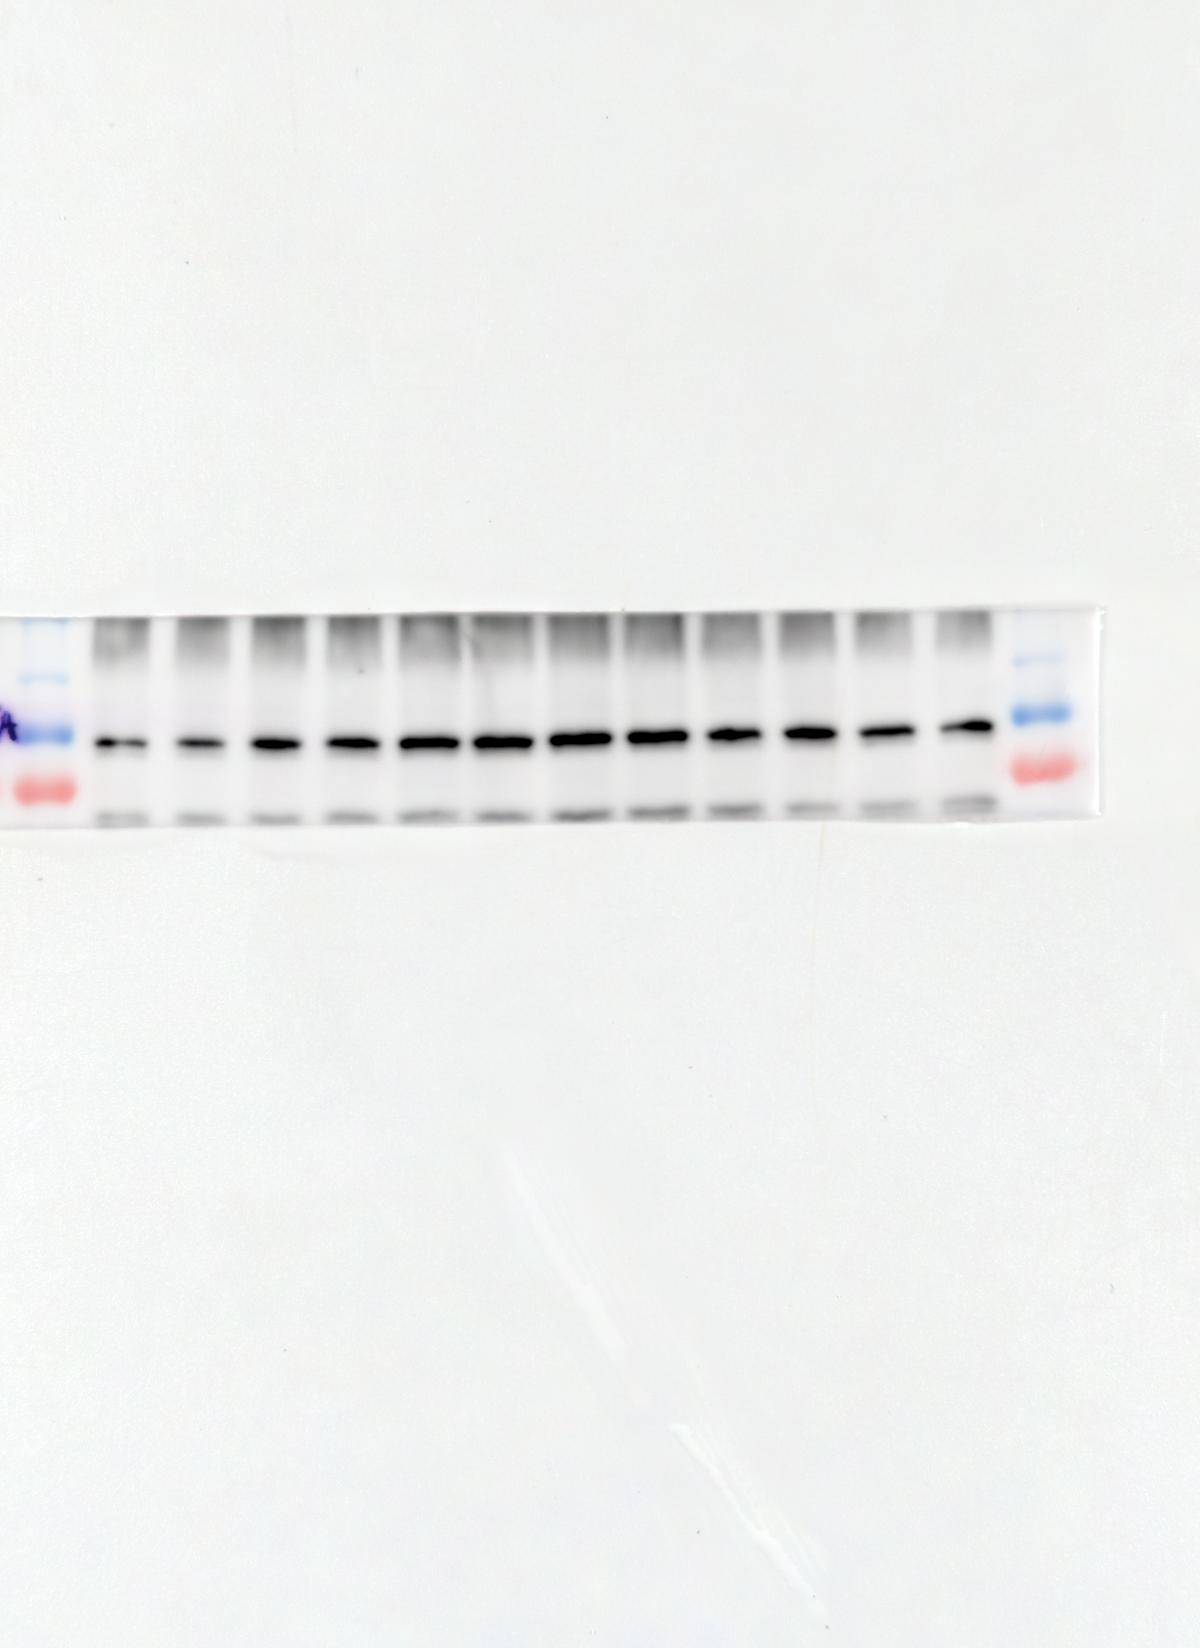


sAPPα 97kDa


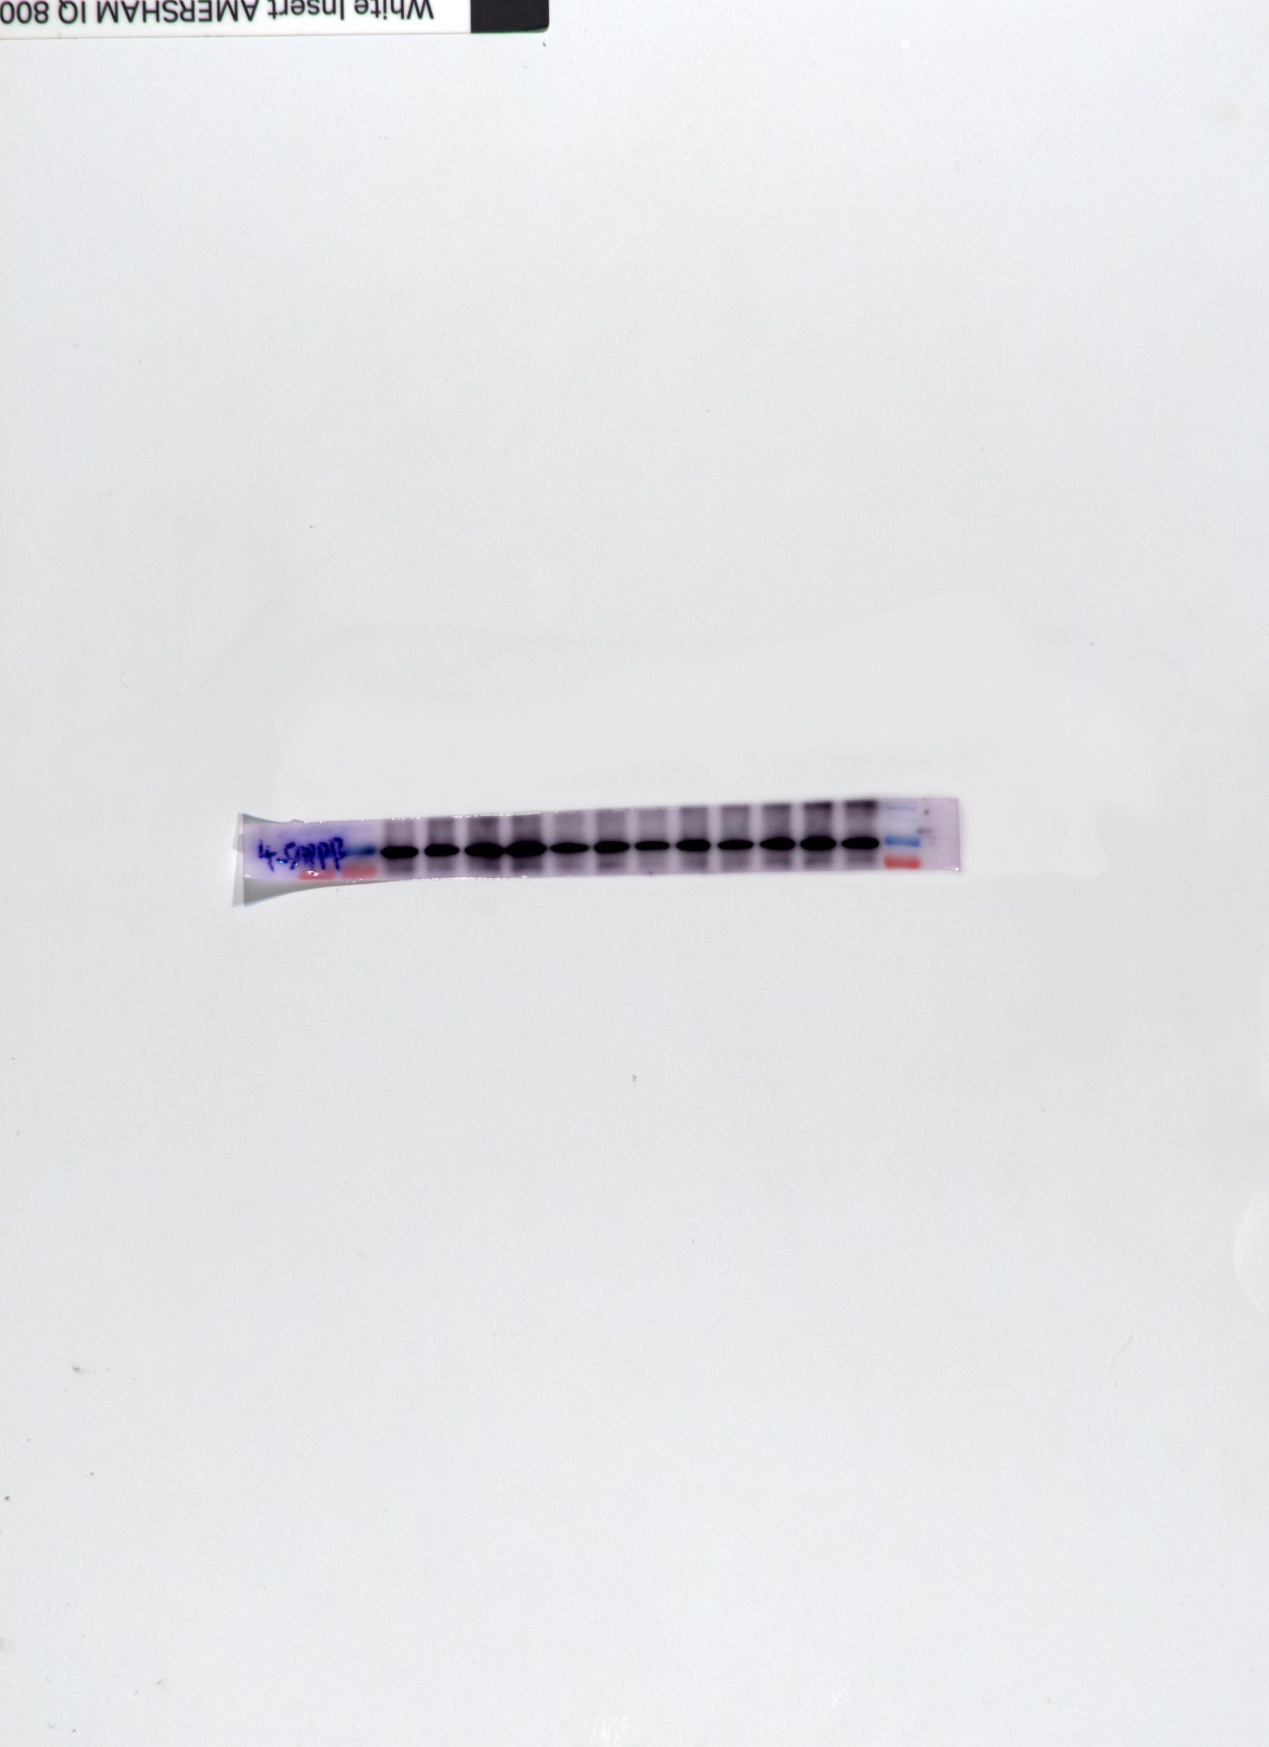


sAPPβ  97kDa


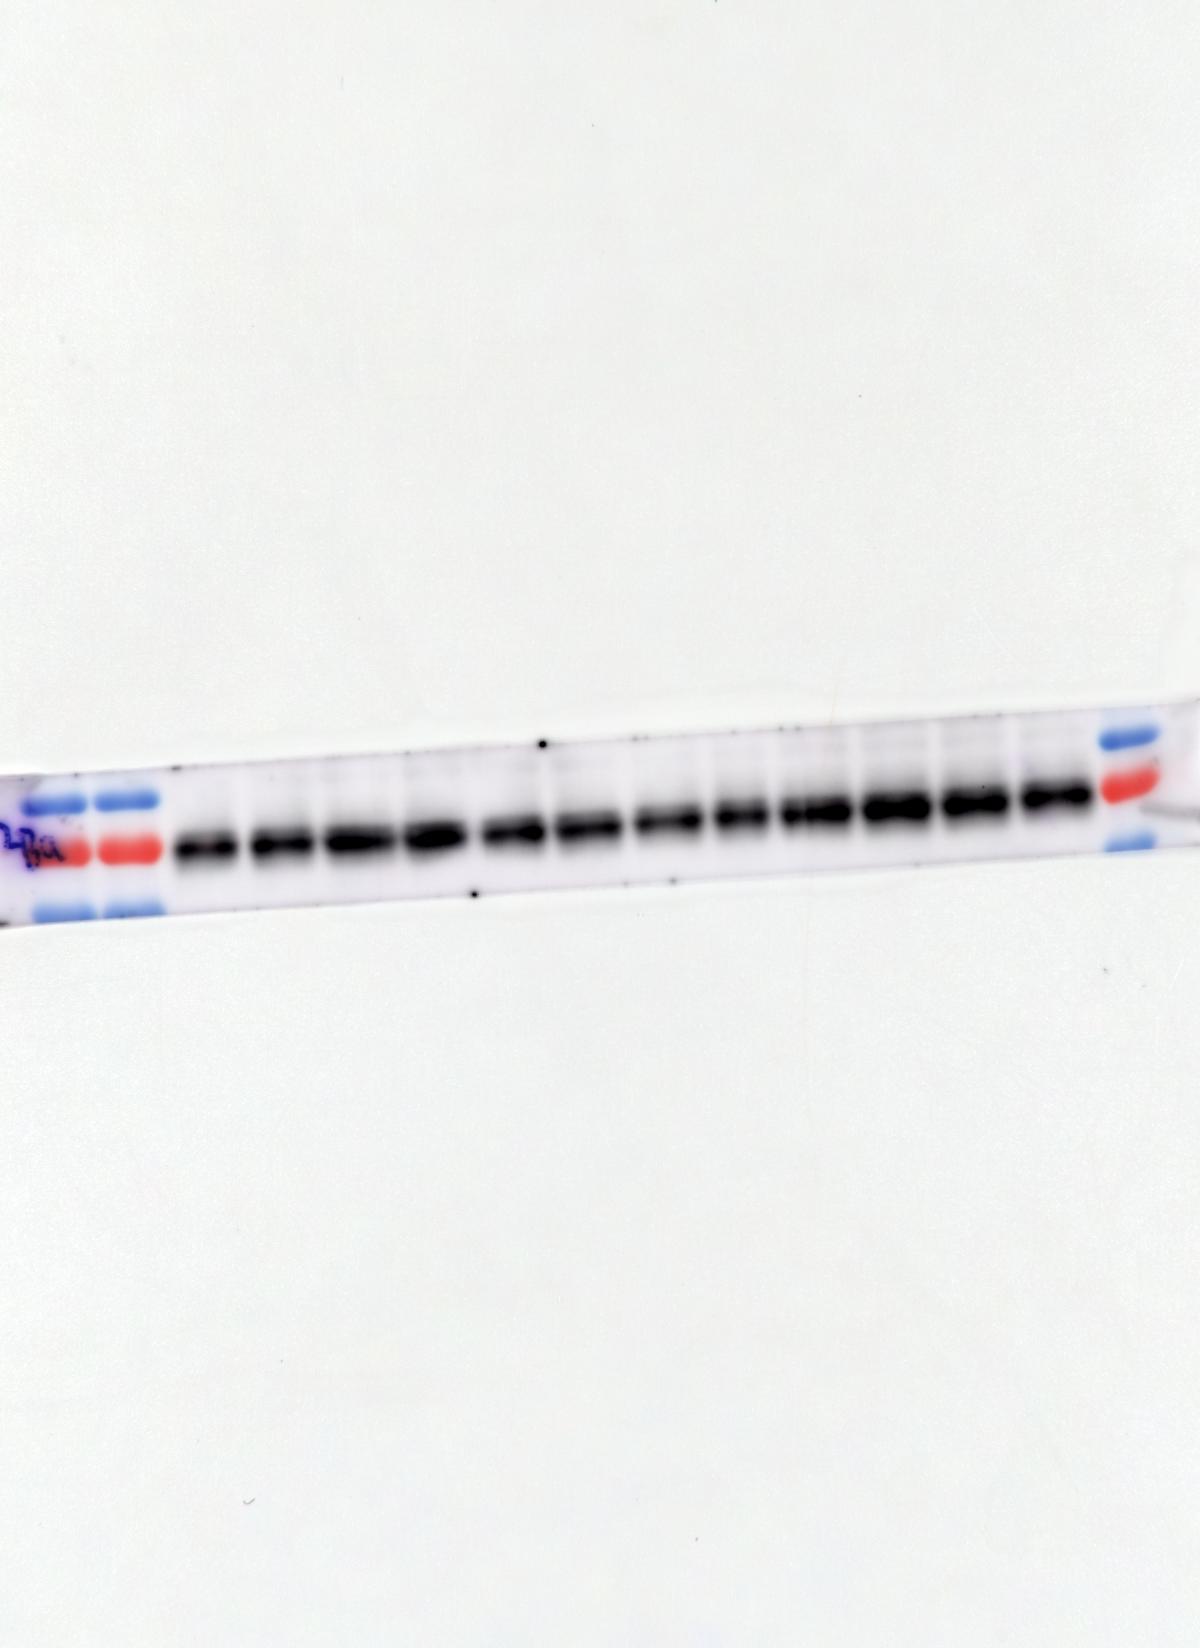


BACE1 70kDa


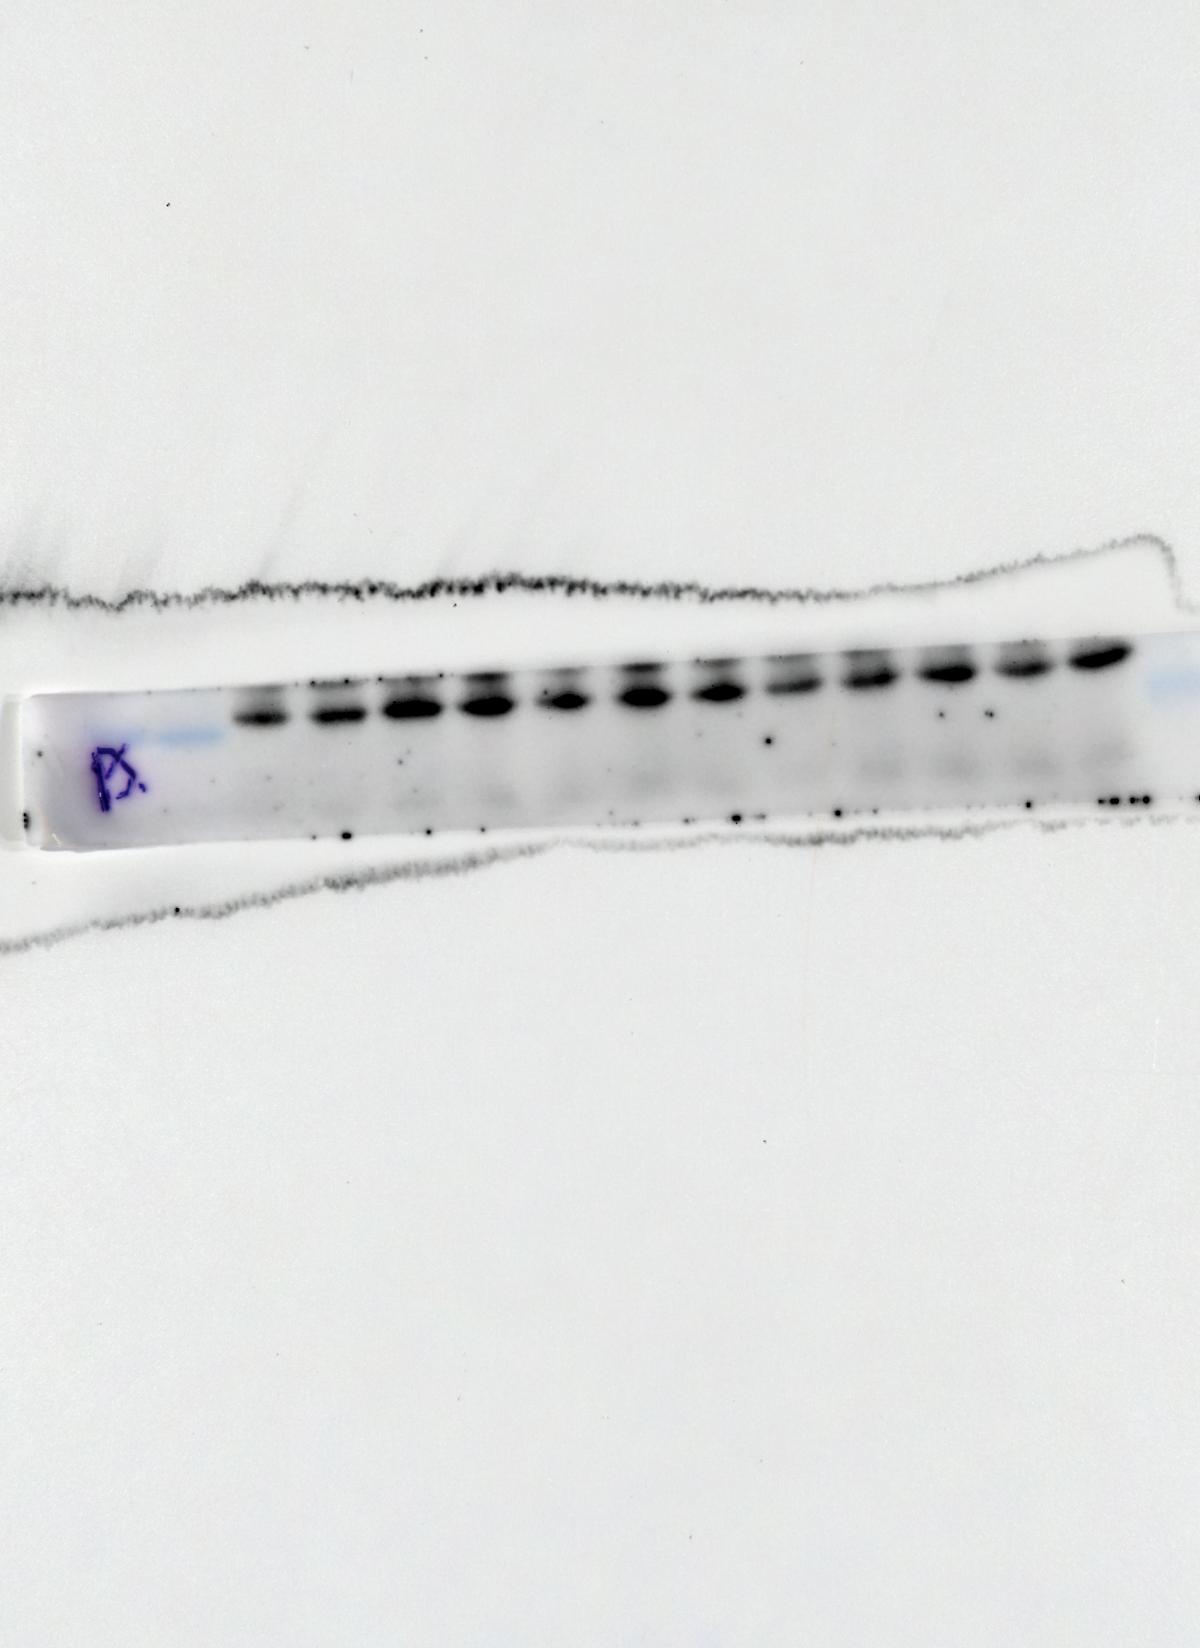


PS1 22kDa


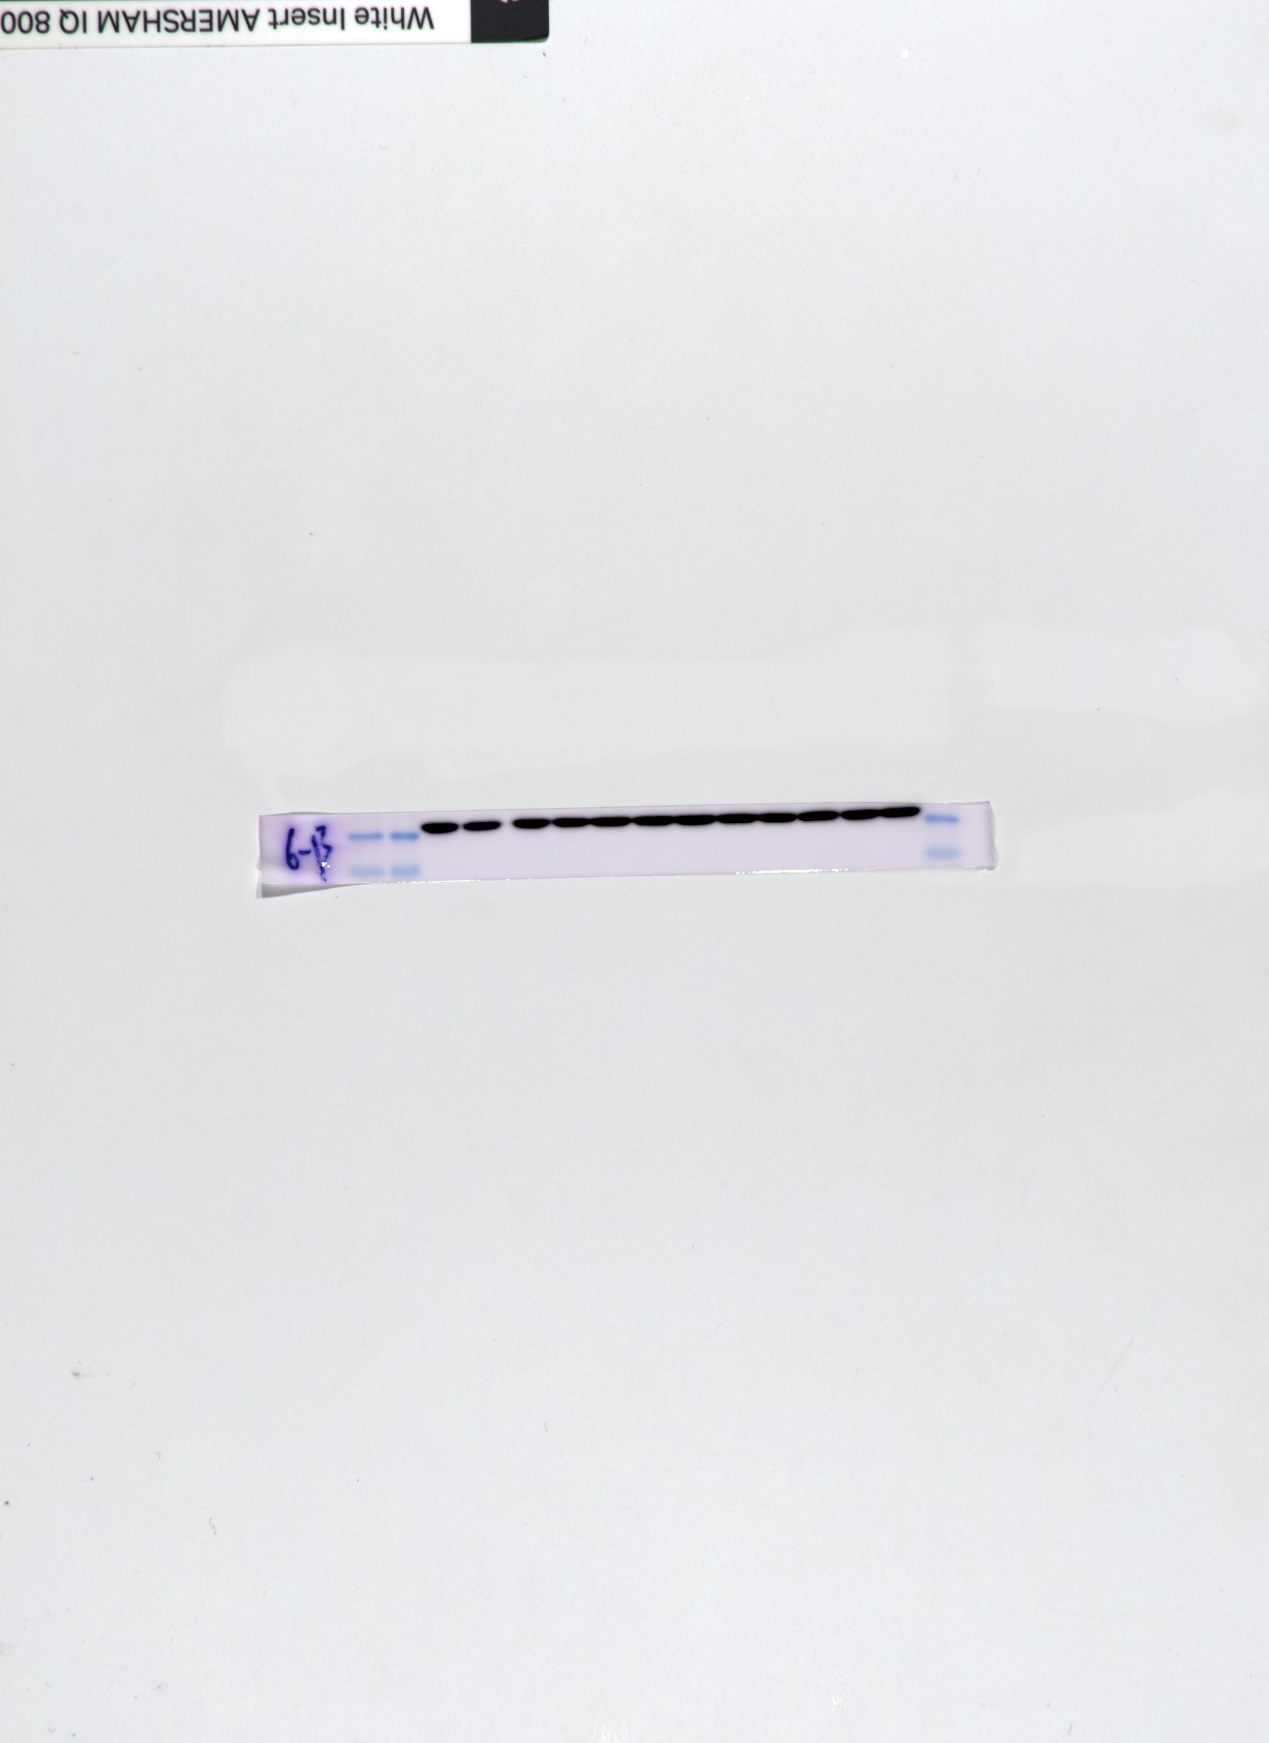


β-actin 42kDa


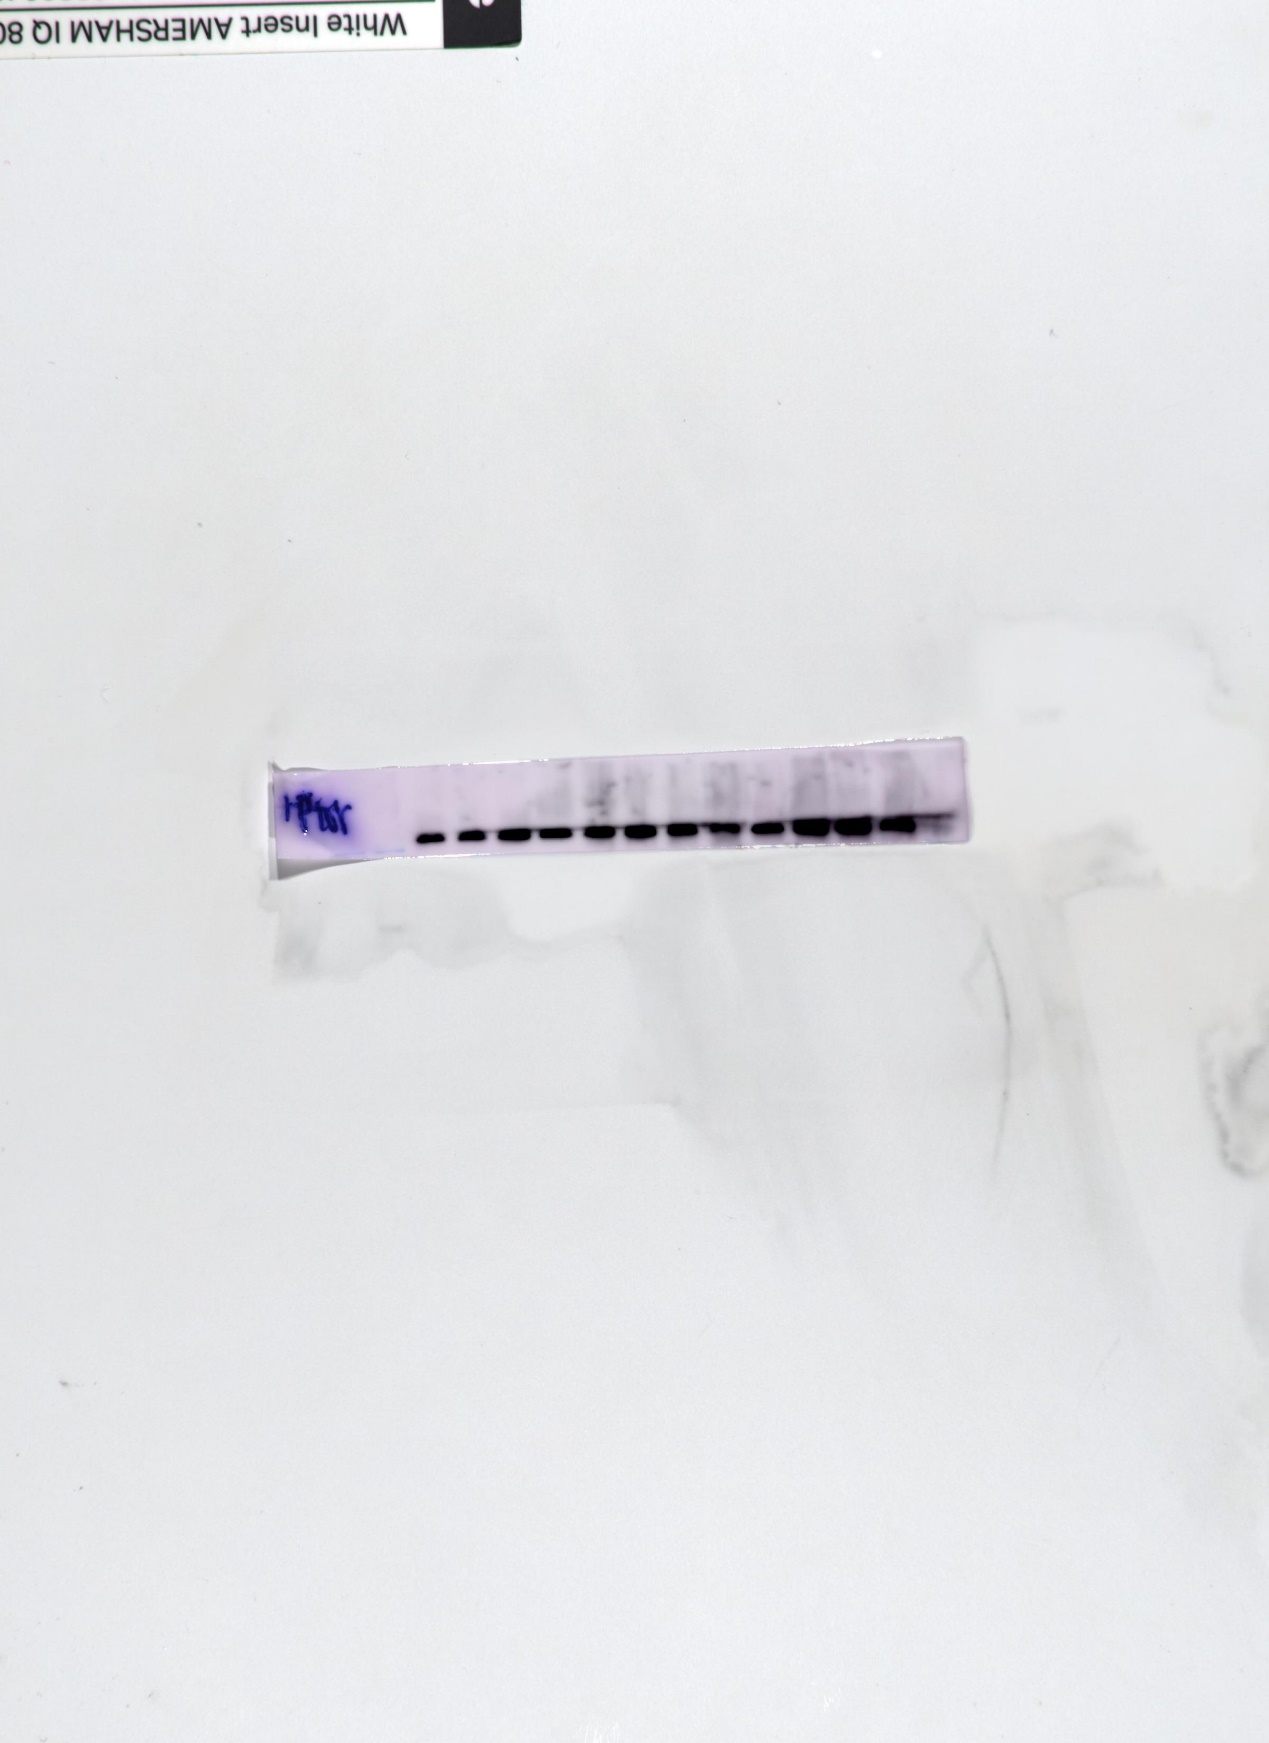


p-mTOR 289kDa


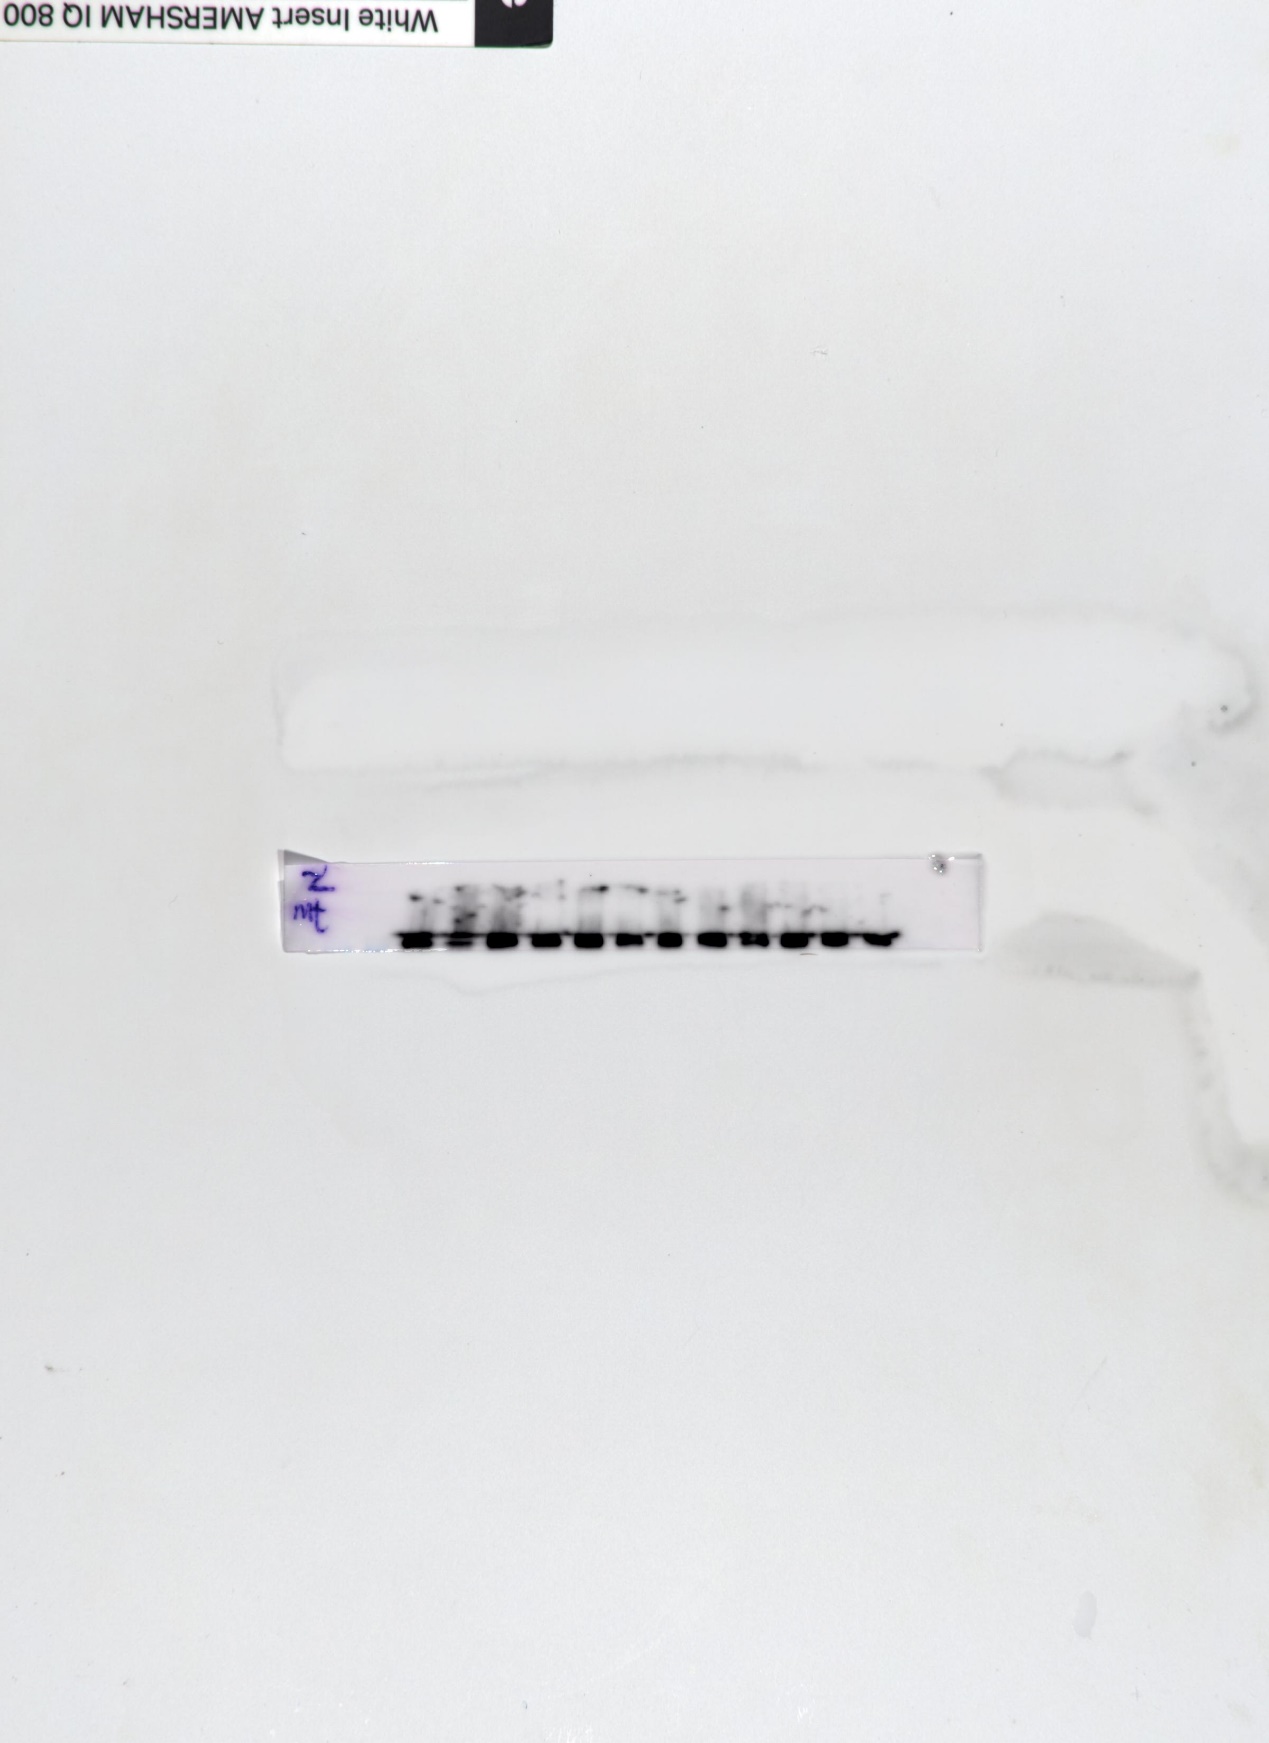


mToR 289kDa


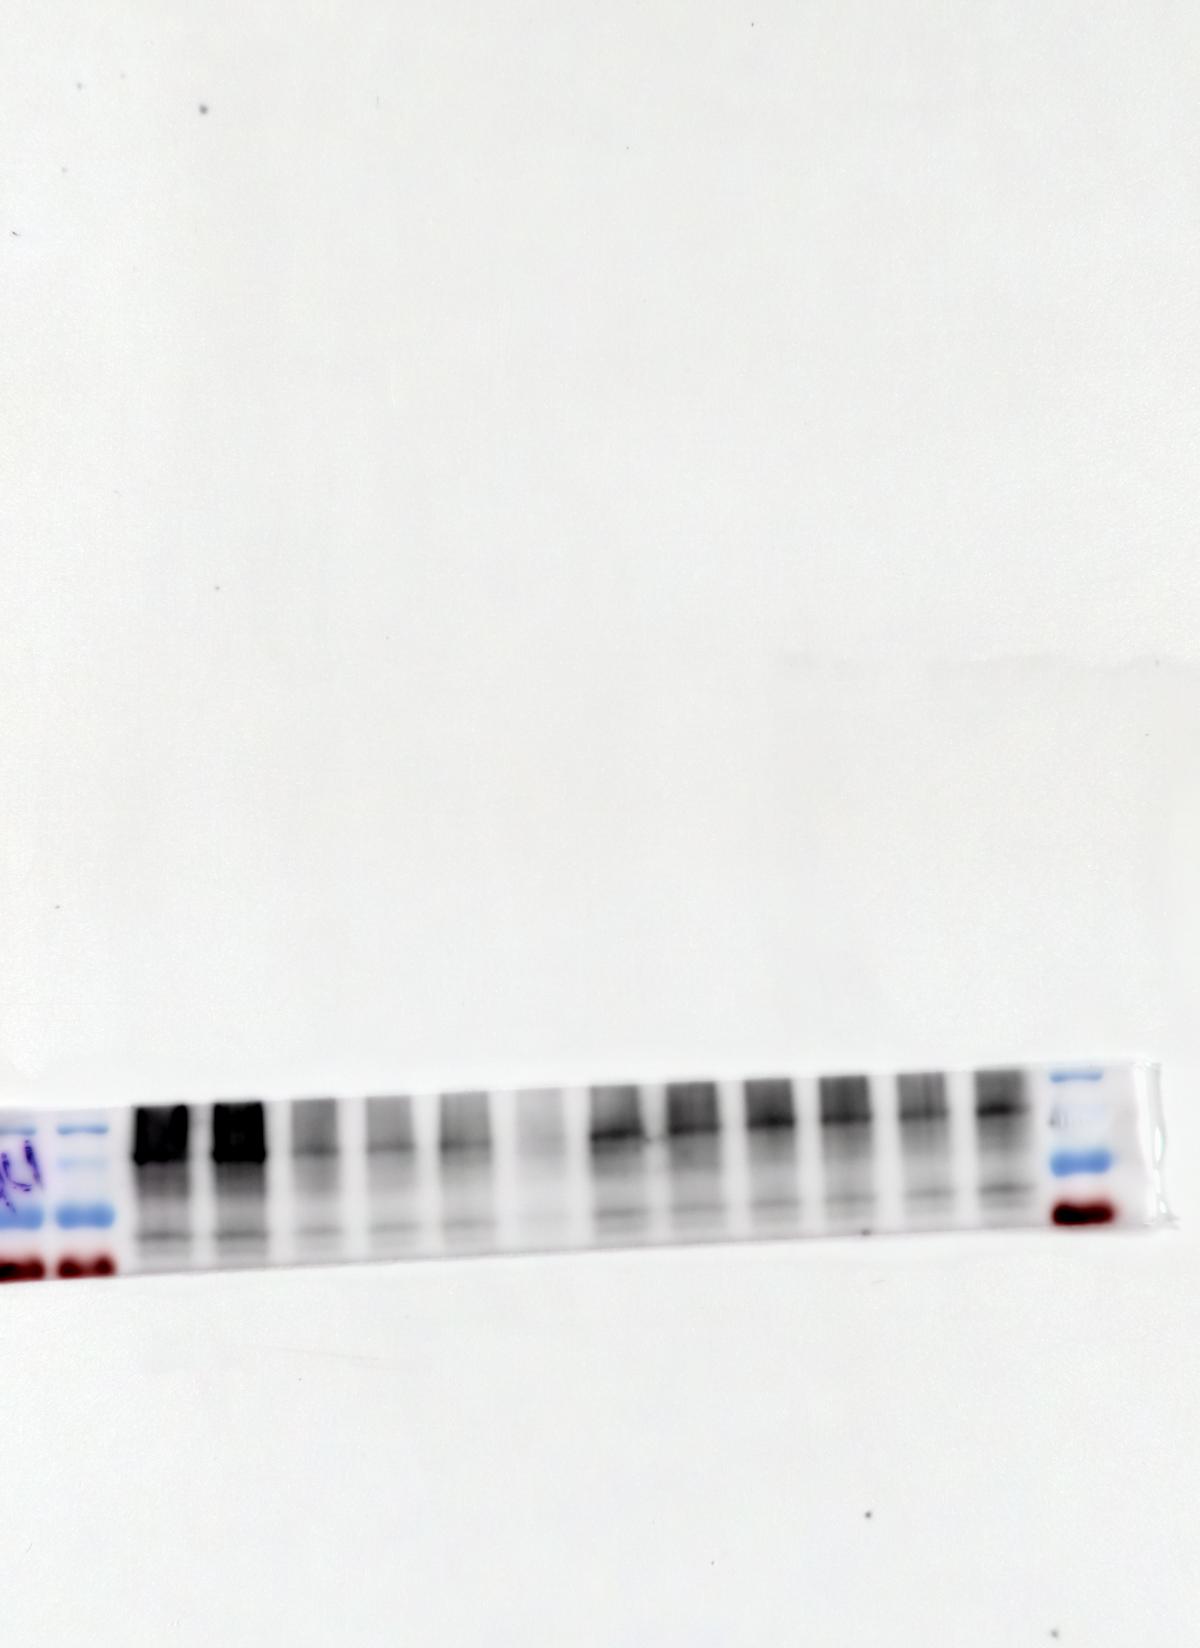


p-ULK1 140kDa


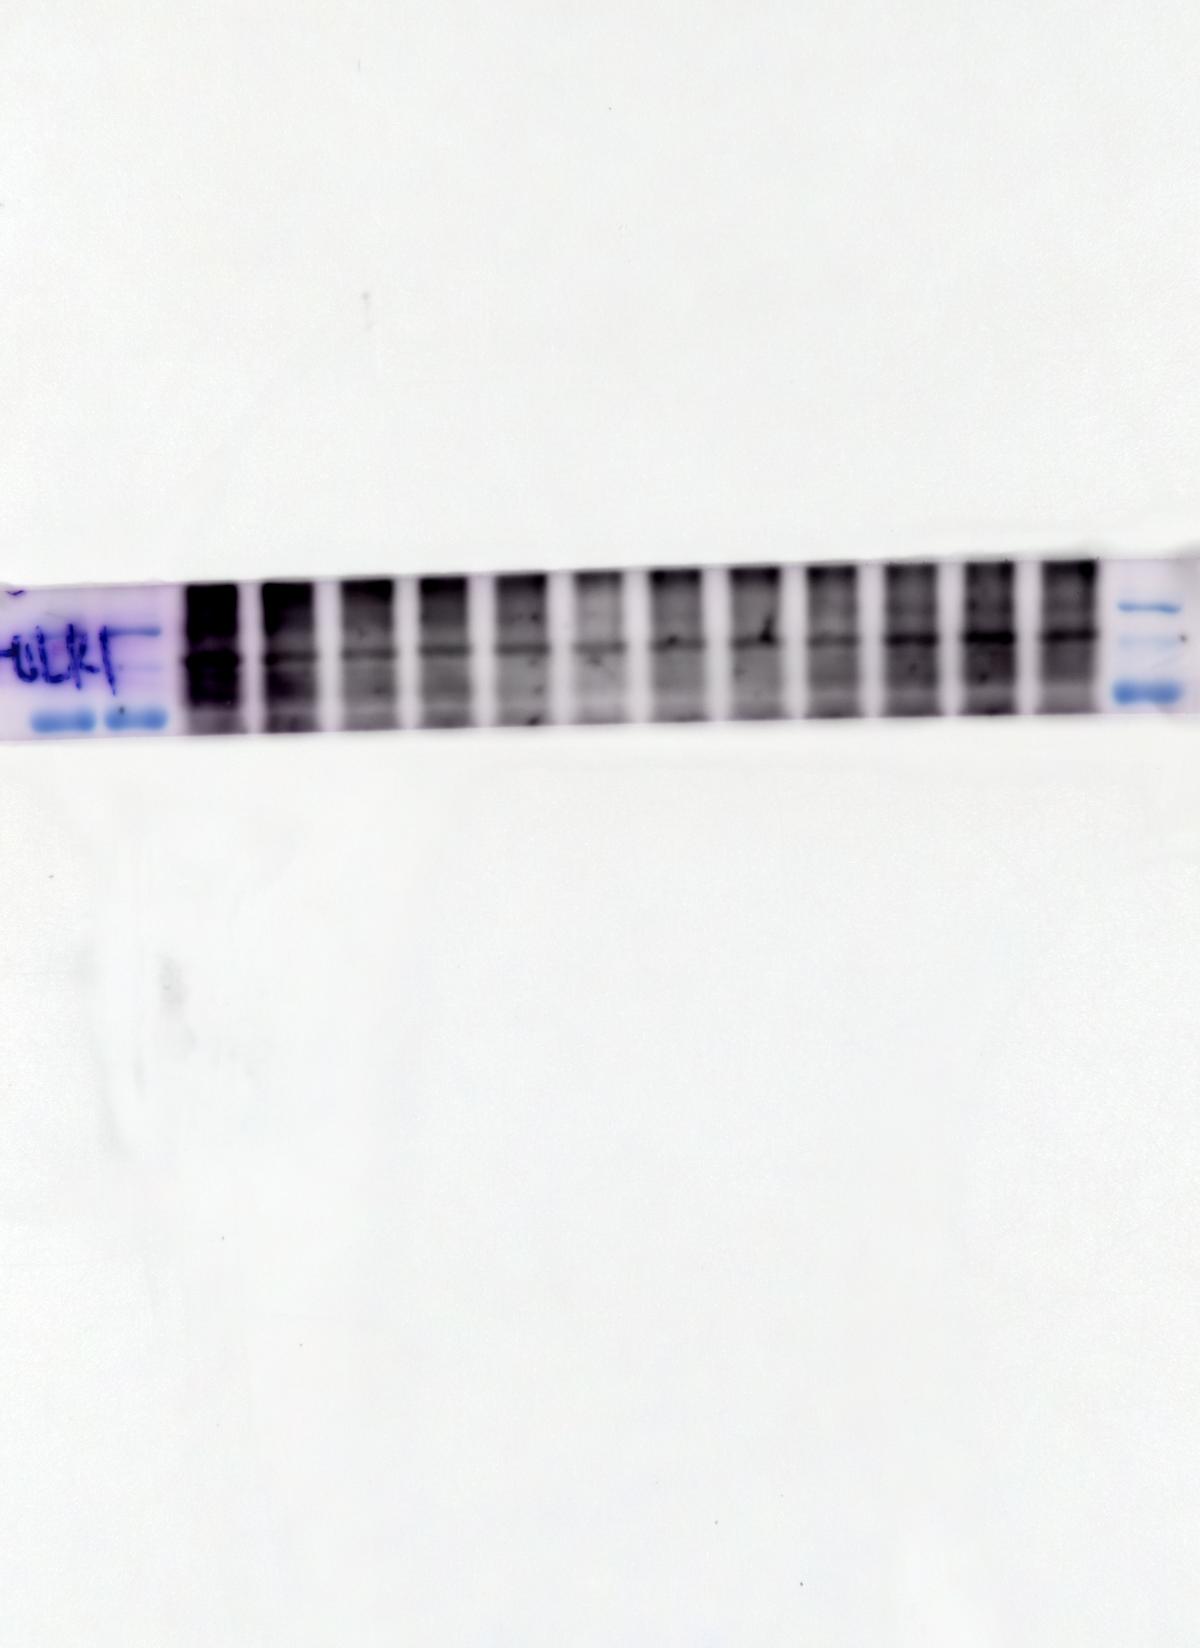


UKL1 140kDa


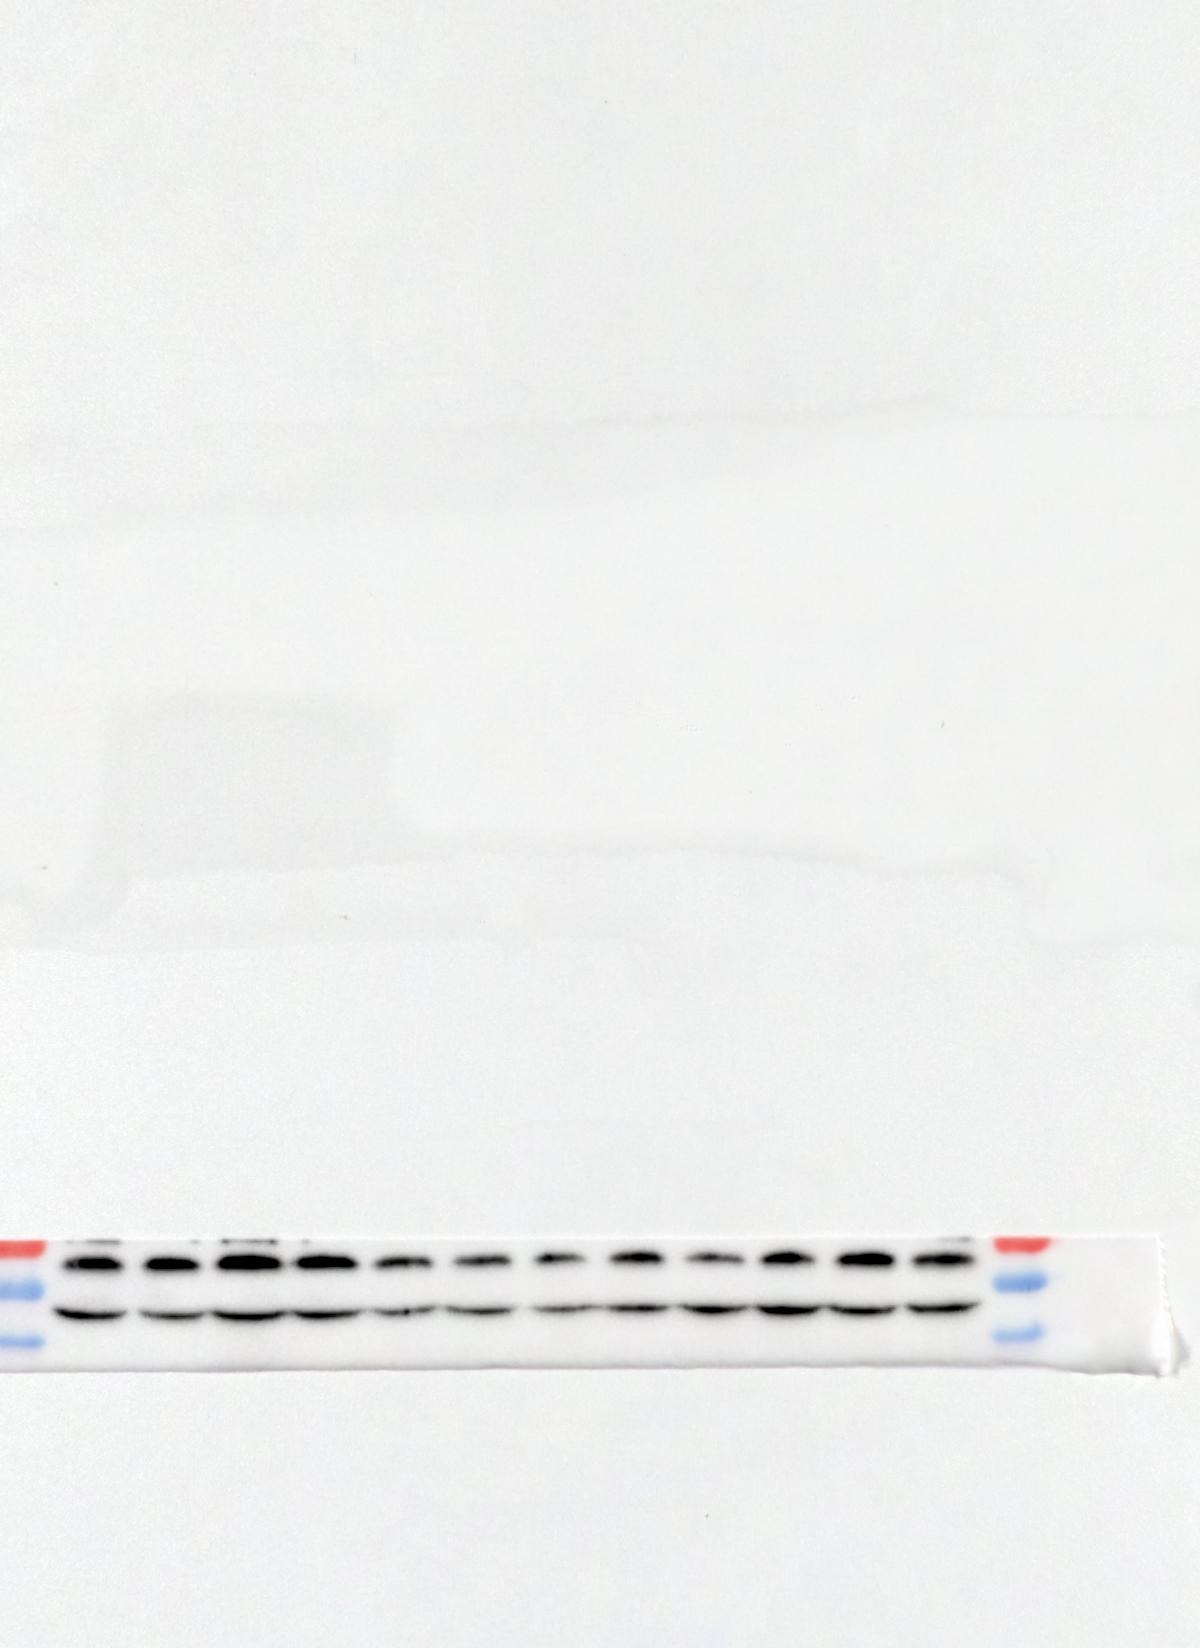


P62 62KDa


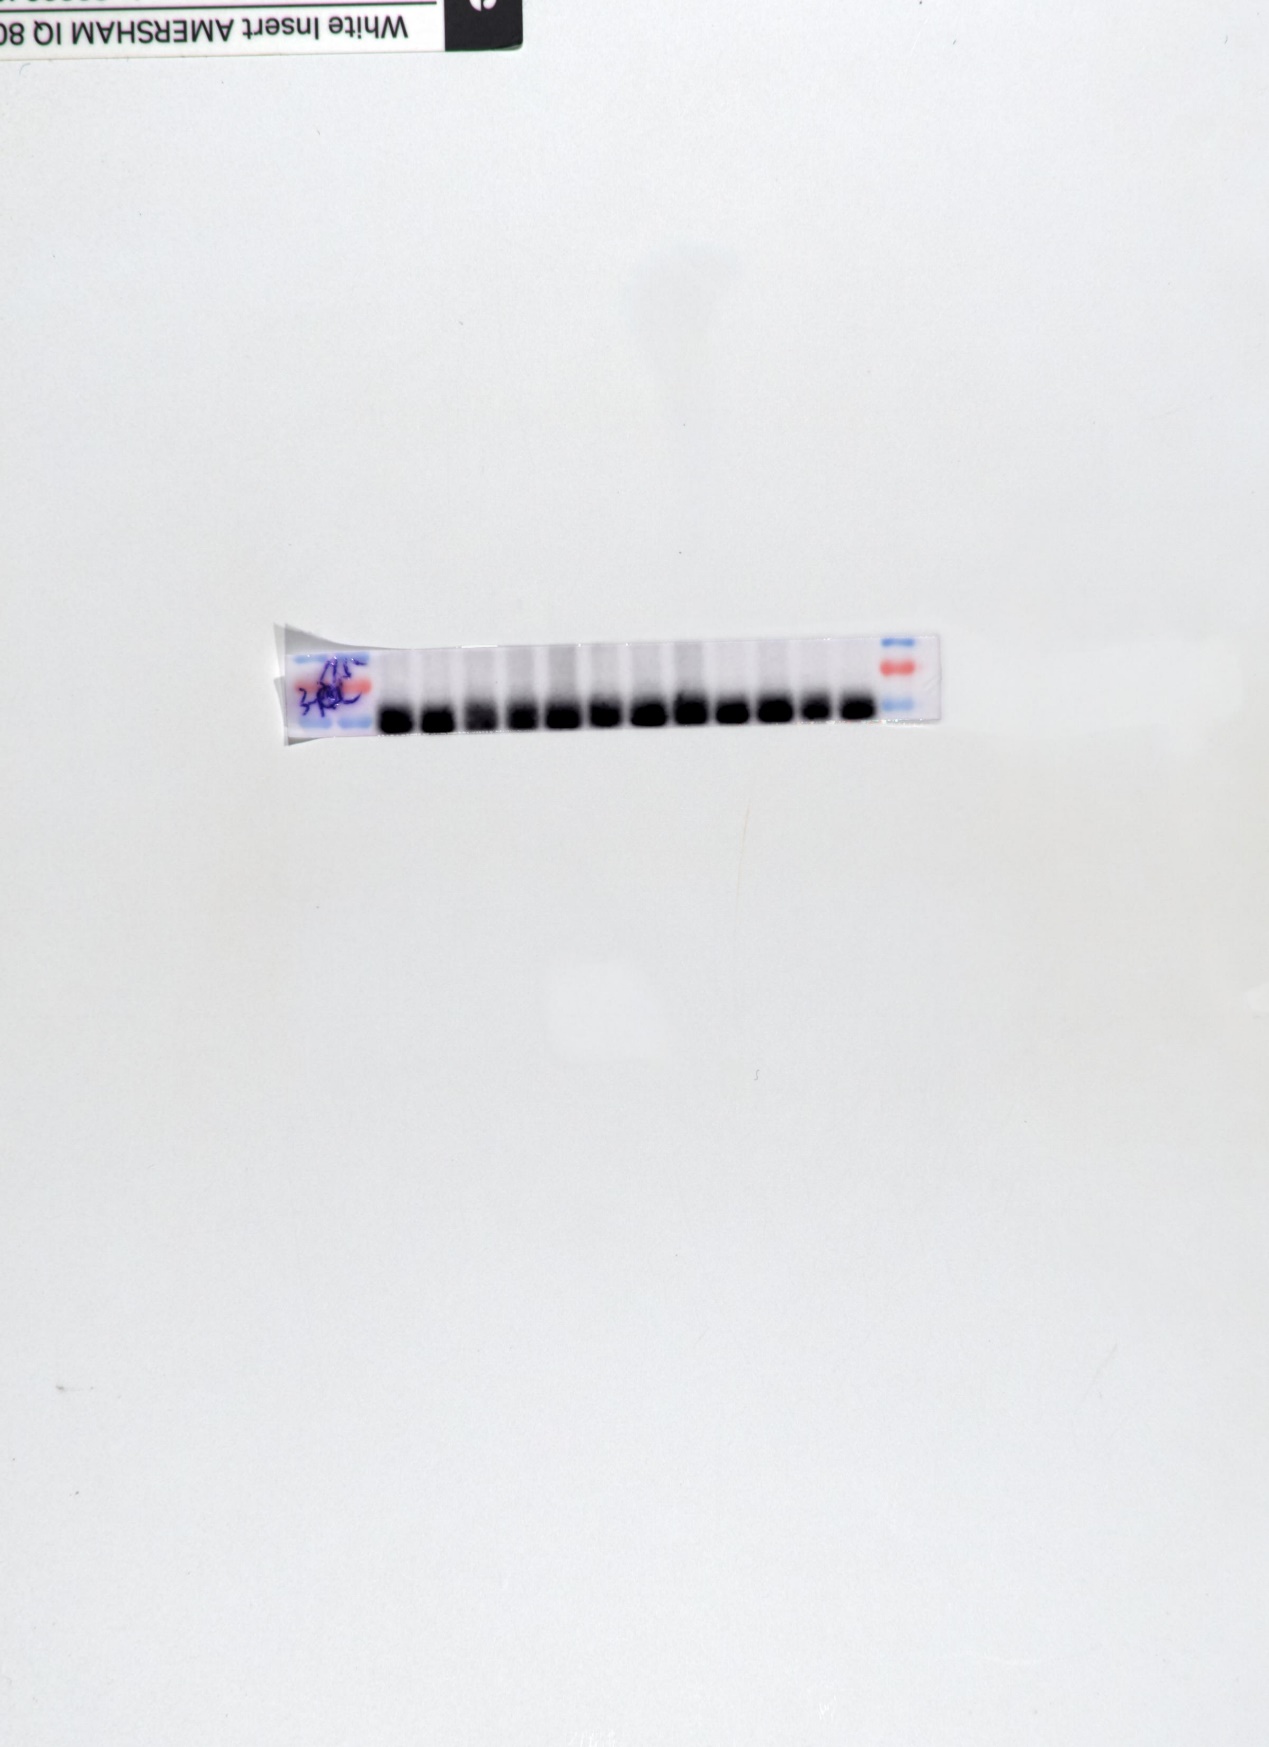


ATG5 55KDa


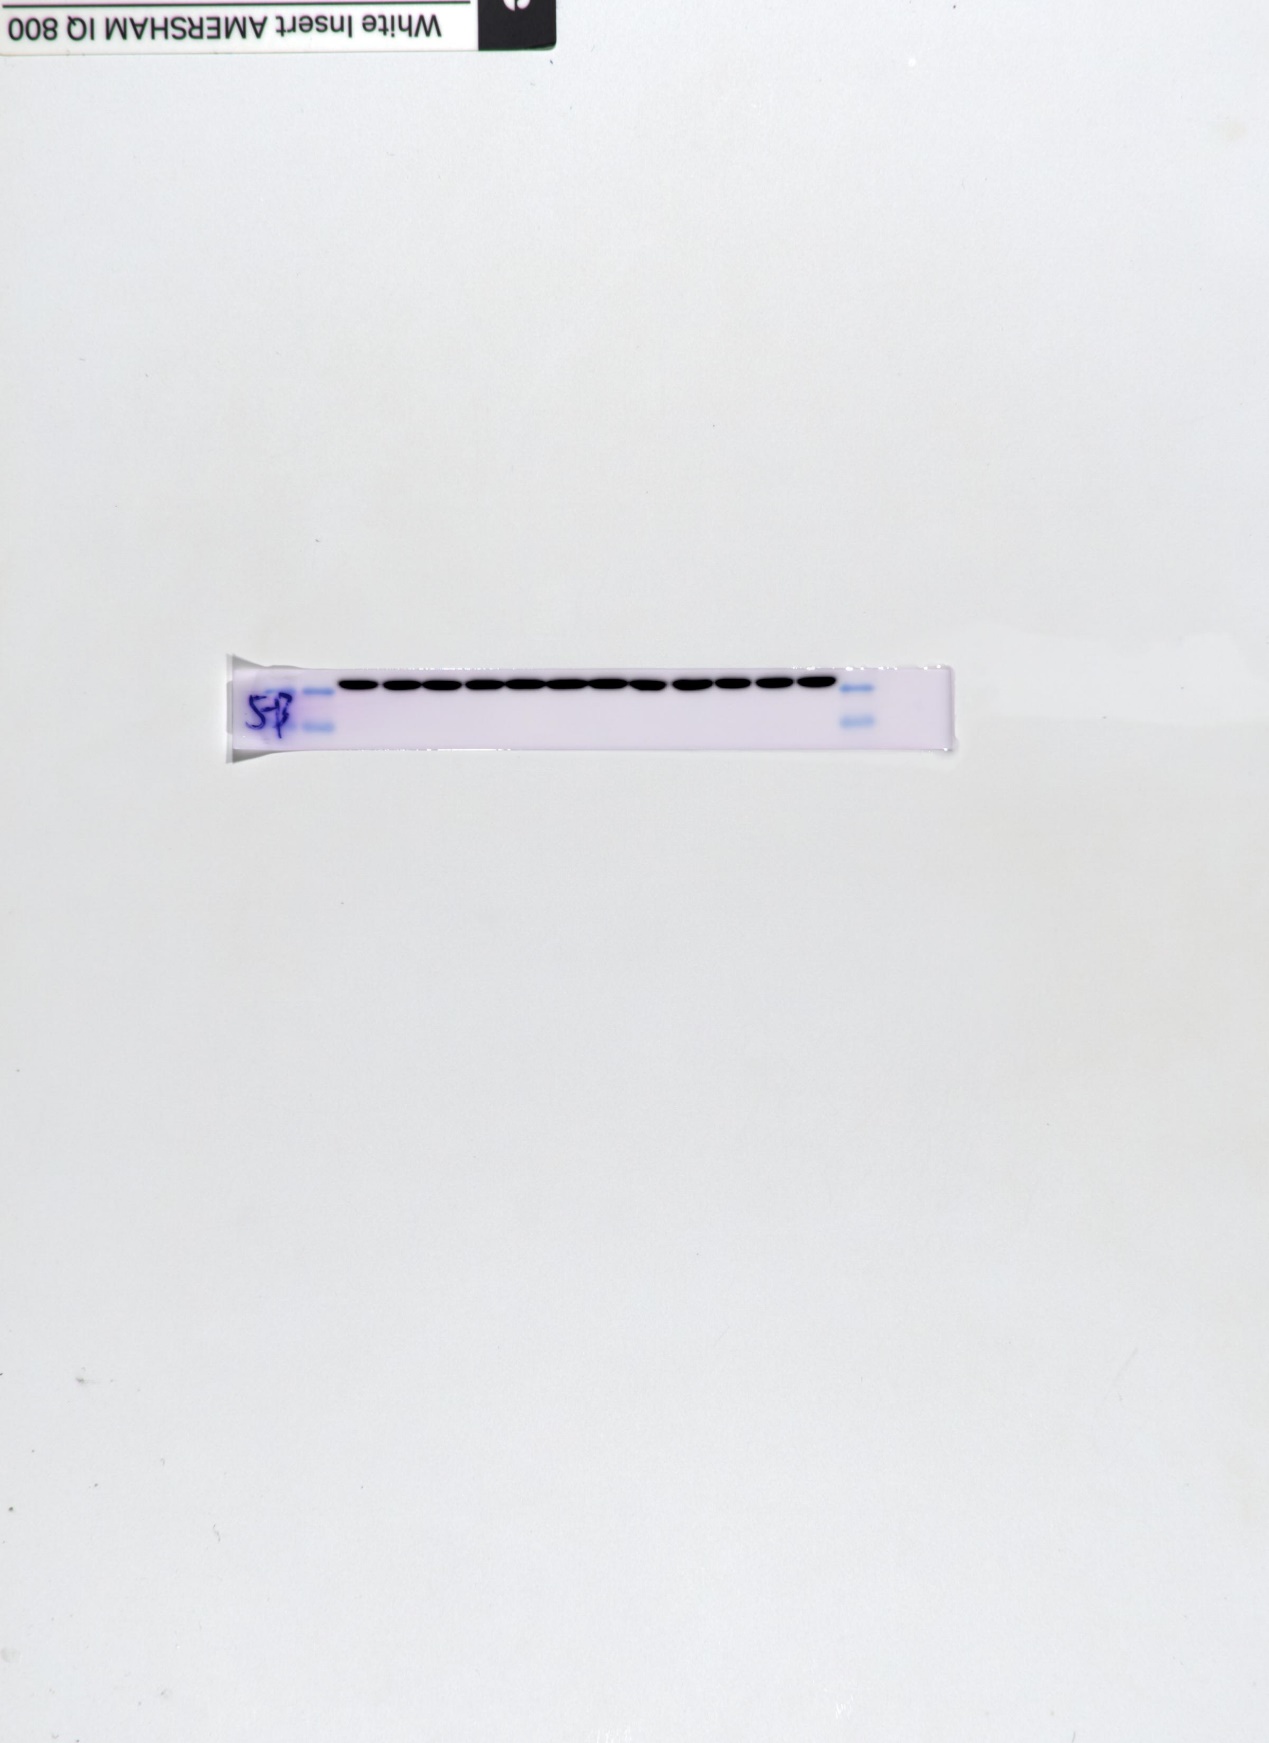


β-actin 42KDa


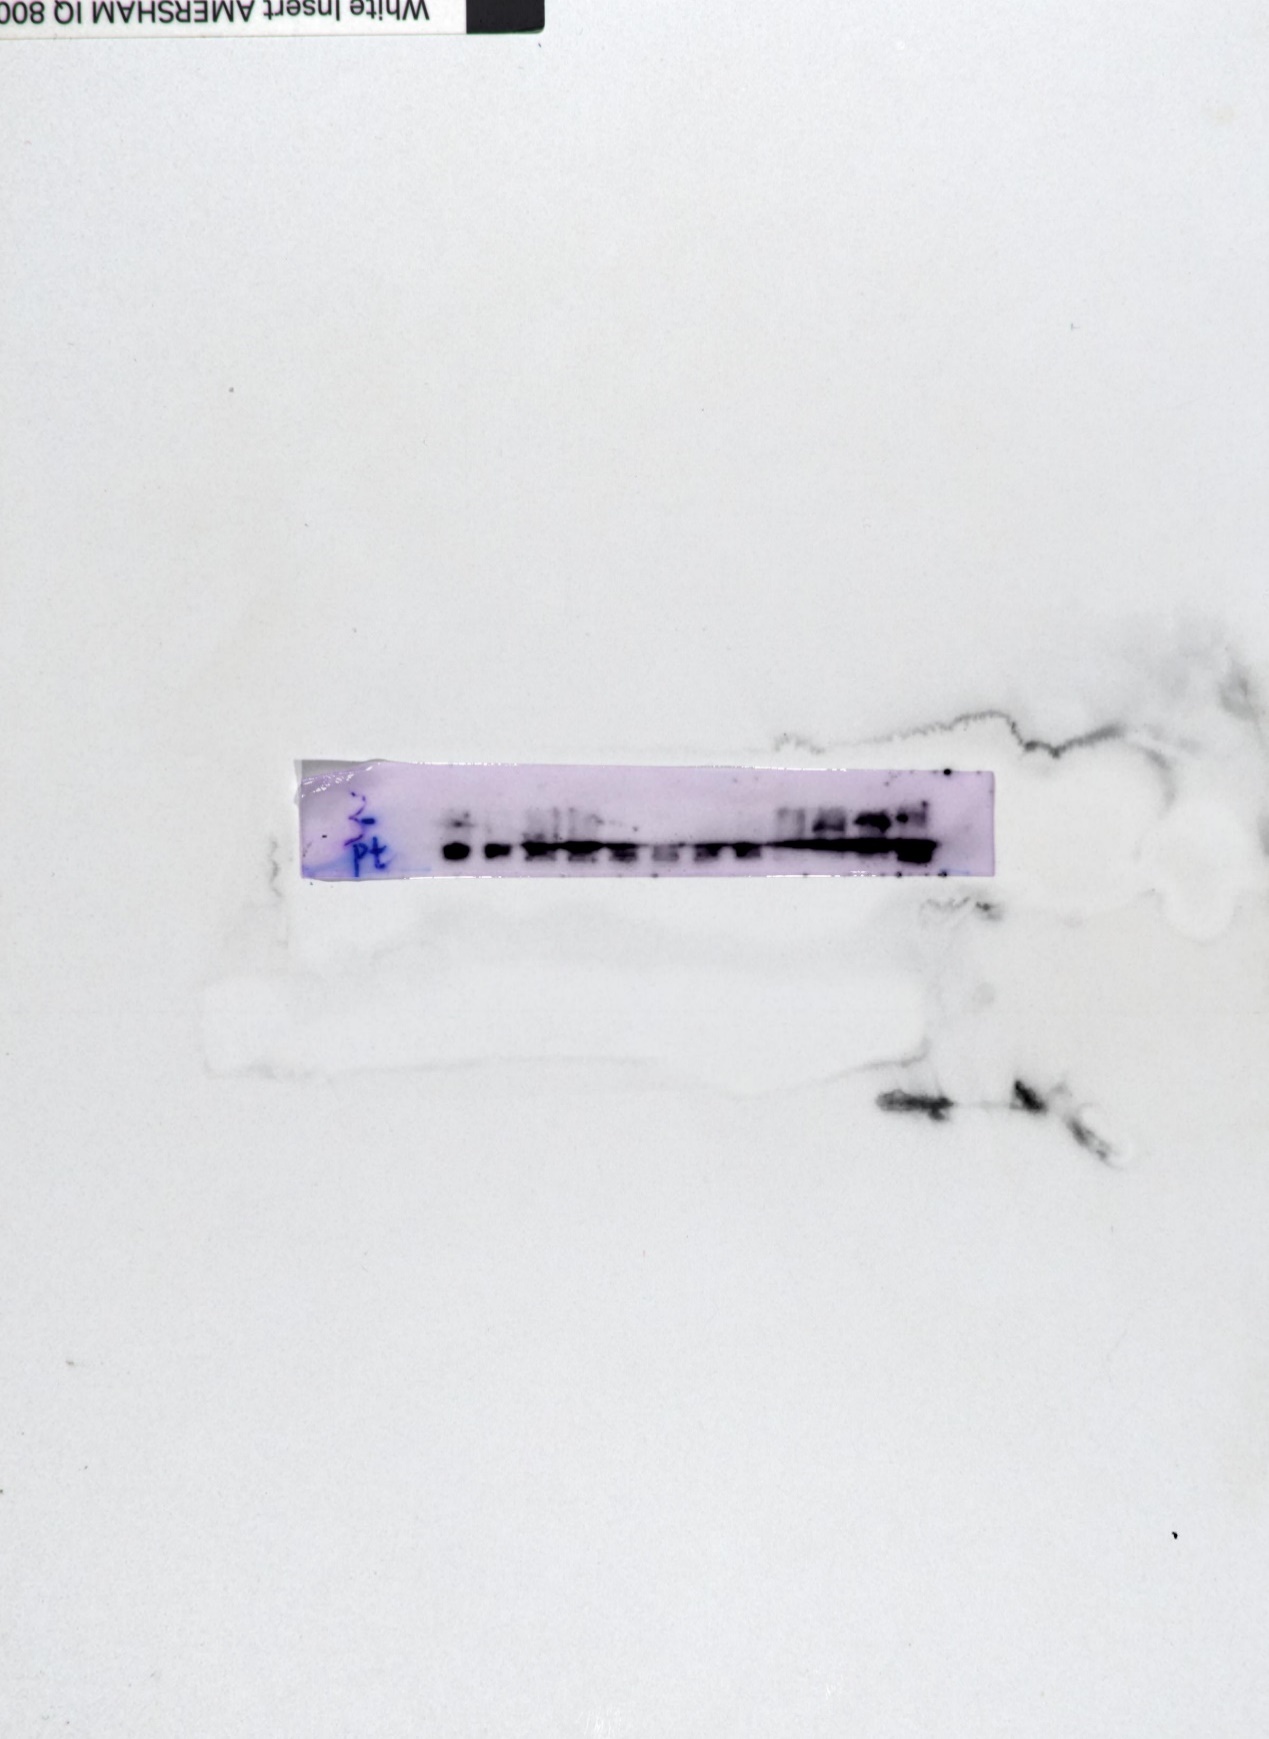


p-mToR 289KDa


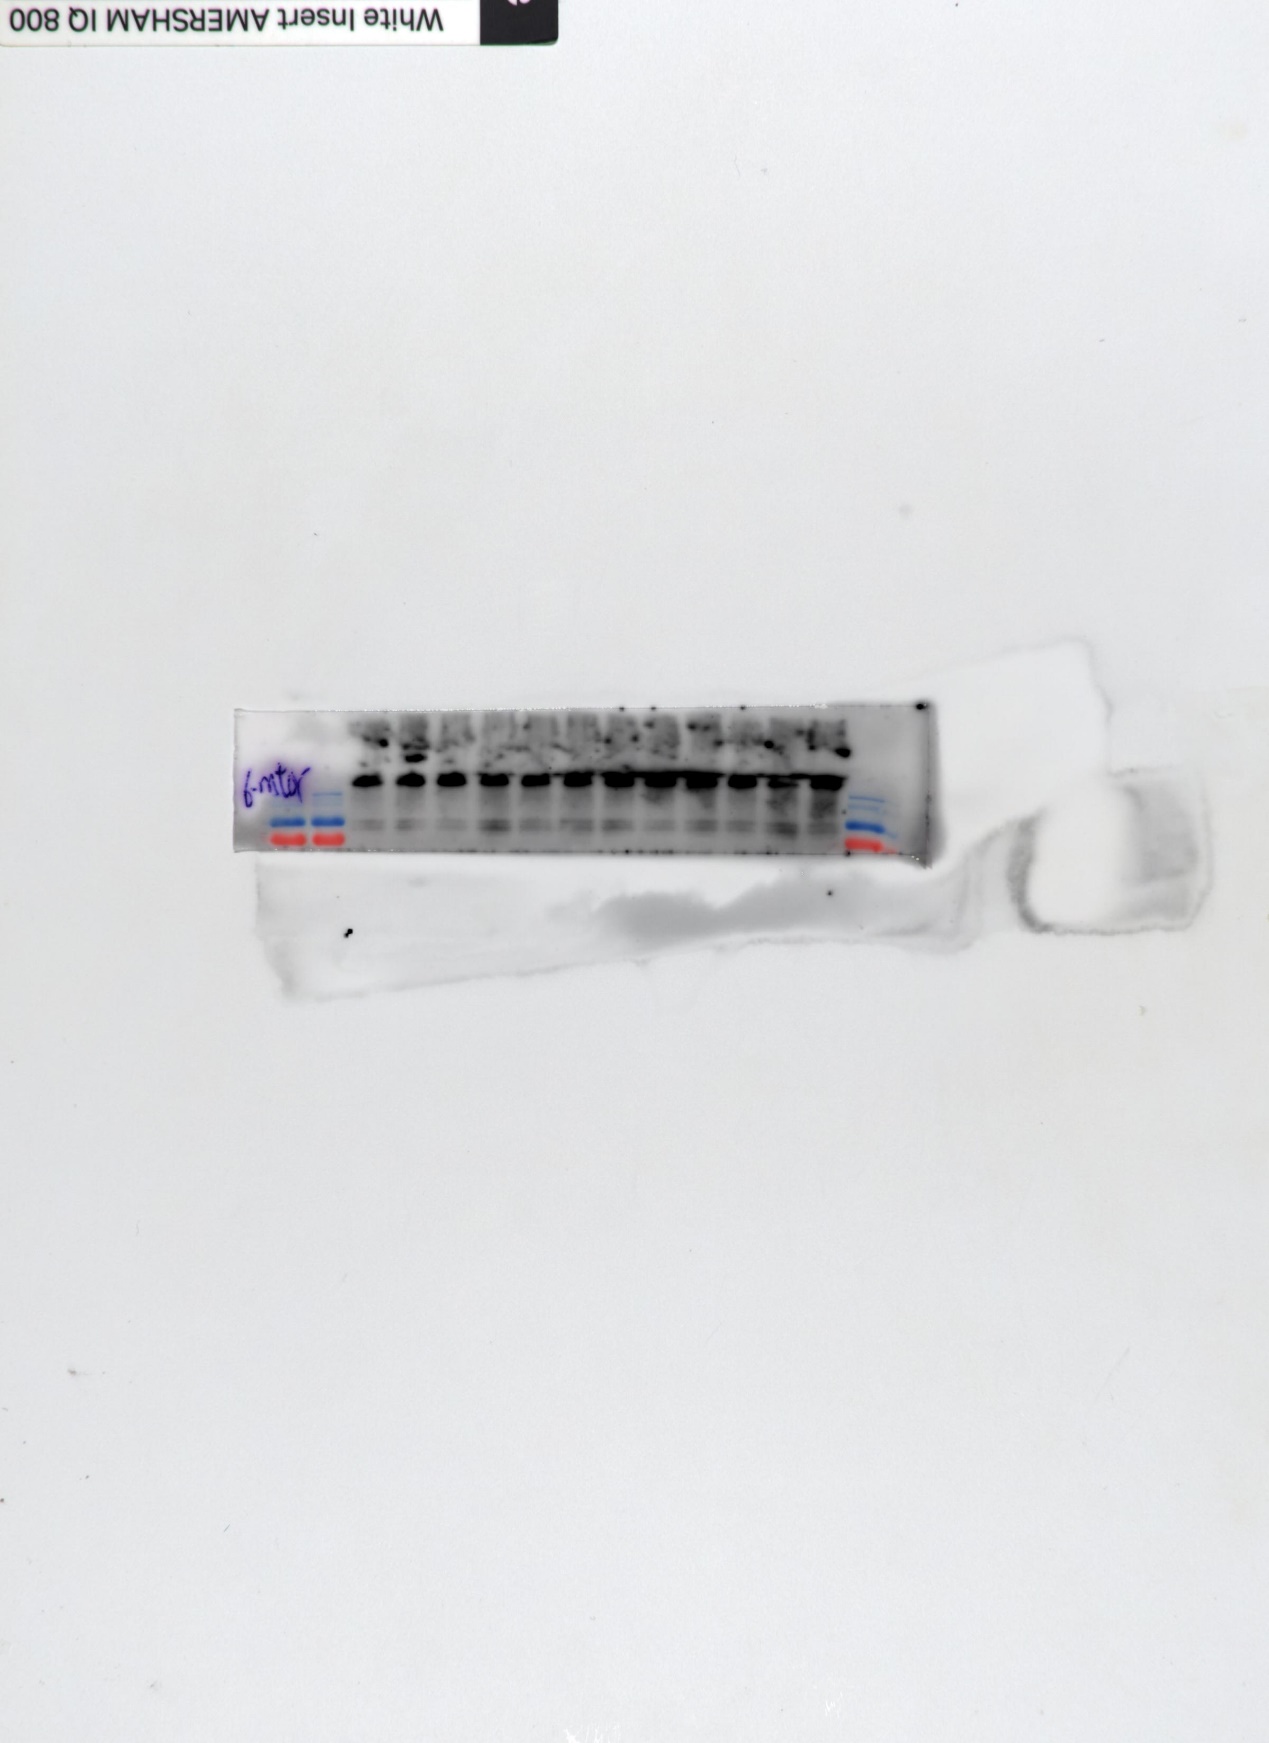


mToR 289KDa


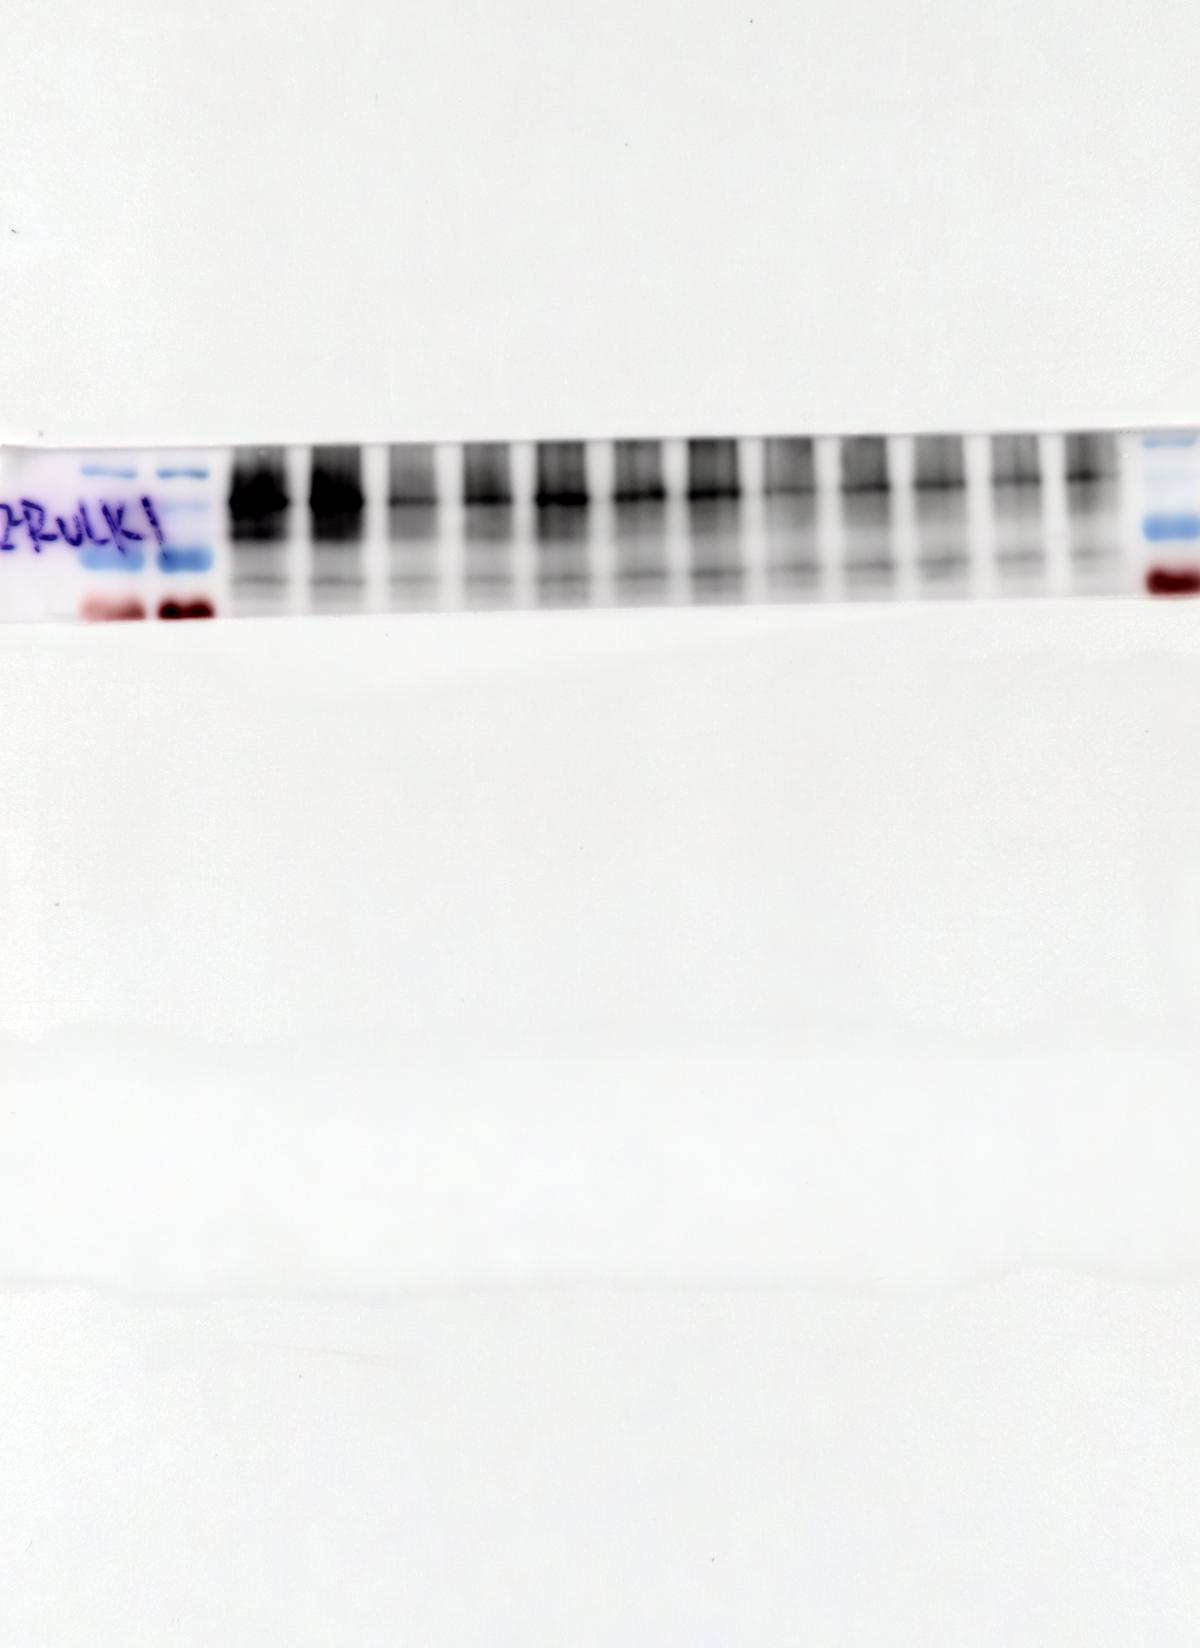


p-ULK1 140KDa


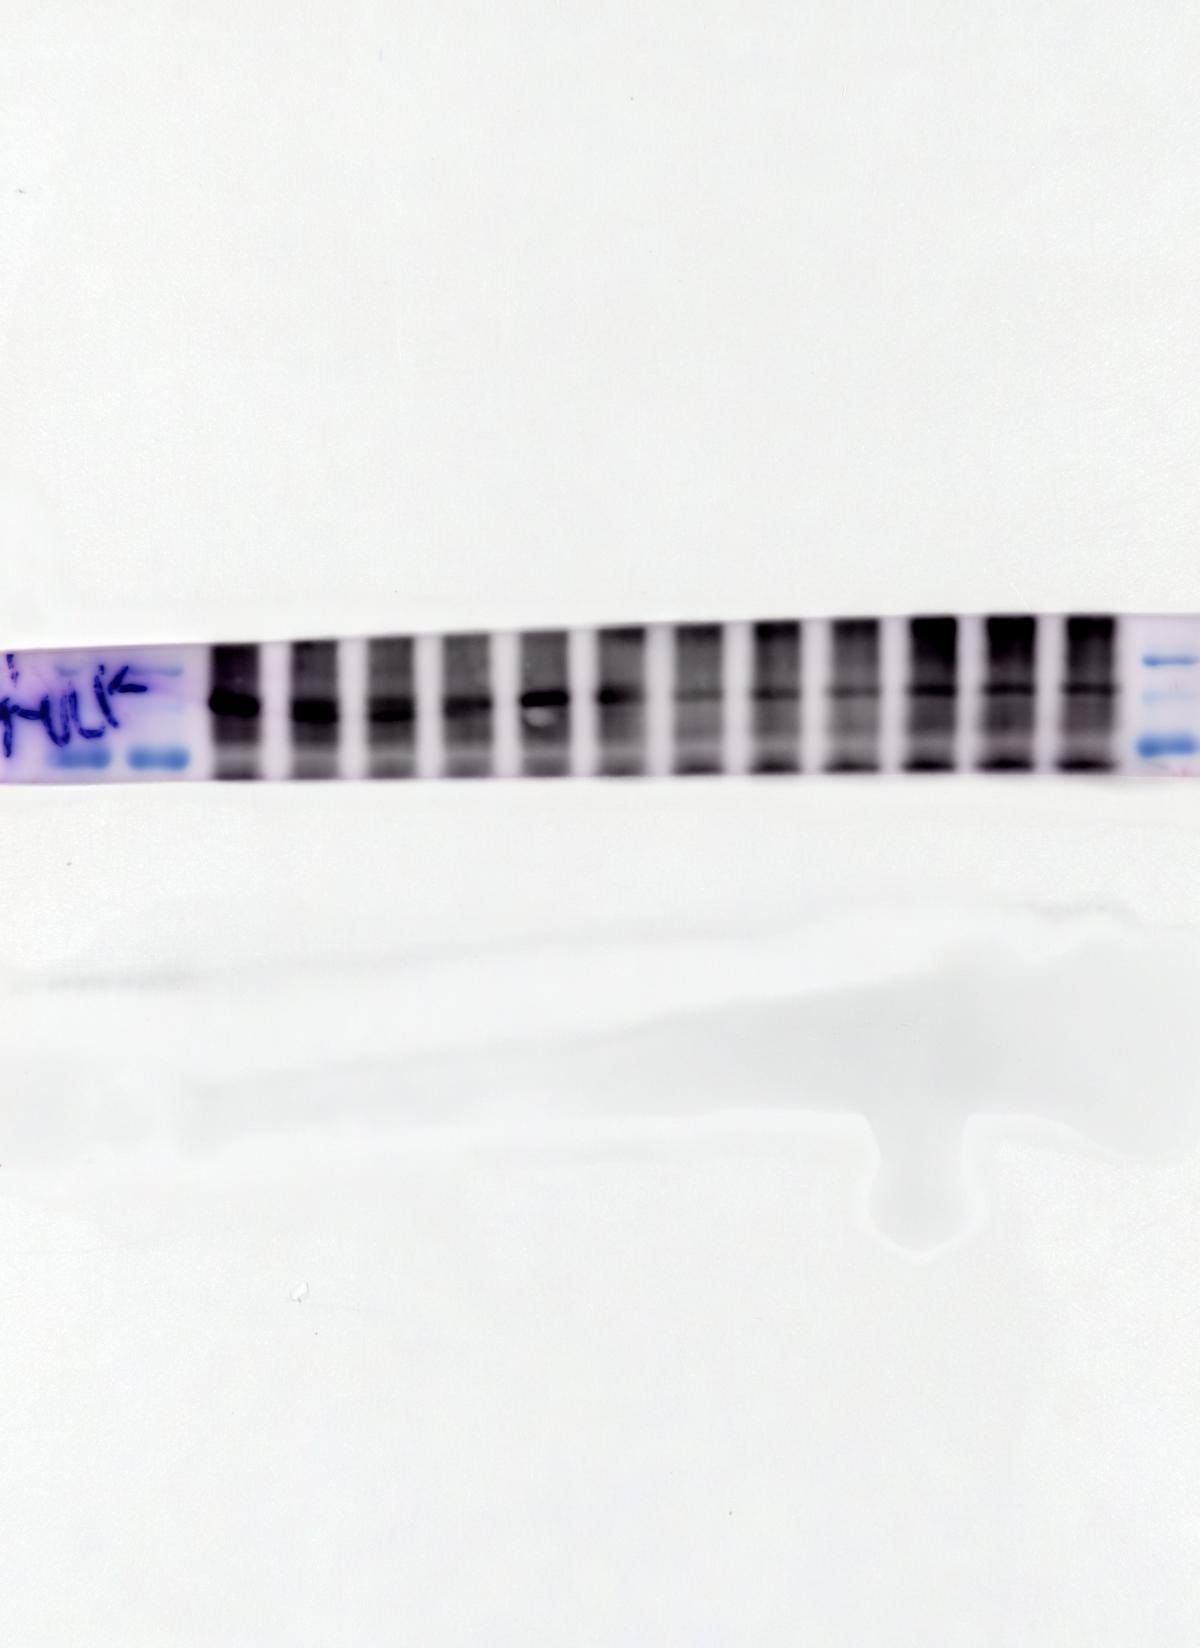


UKL1 140KDa


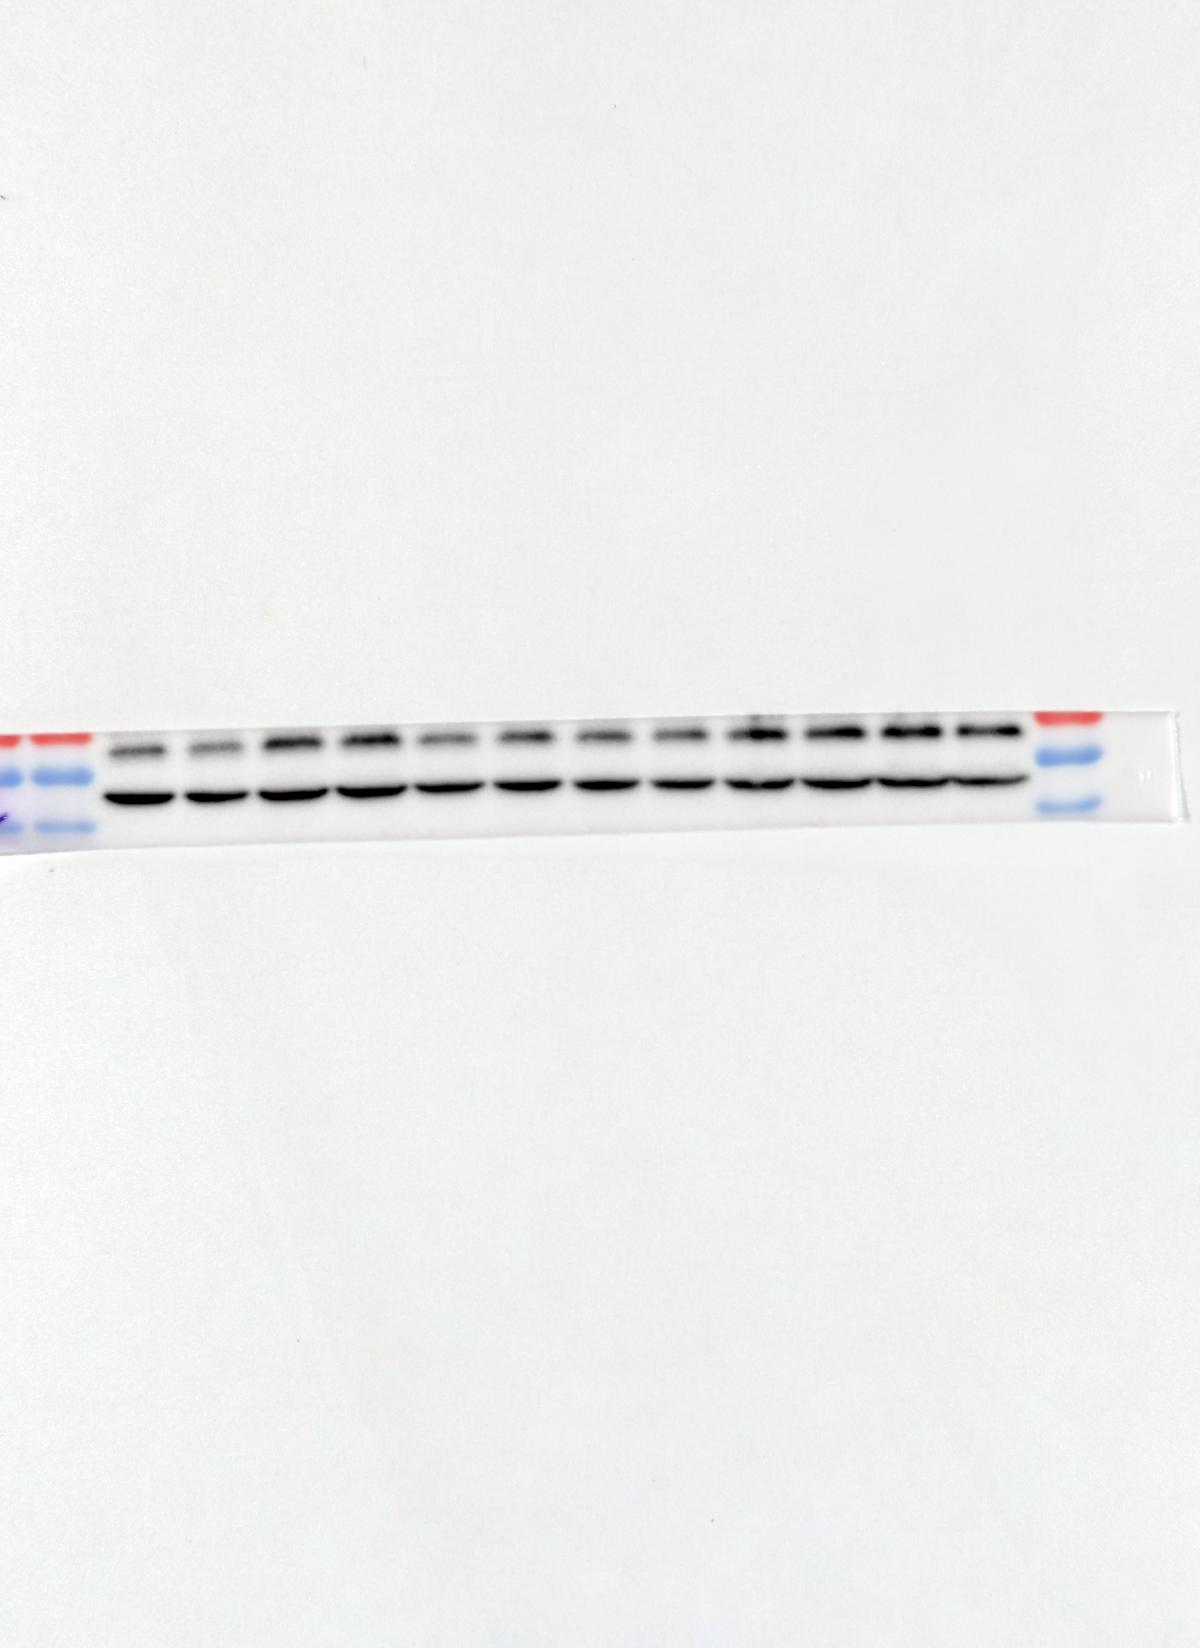


P62 62KDa


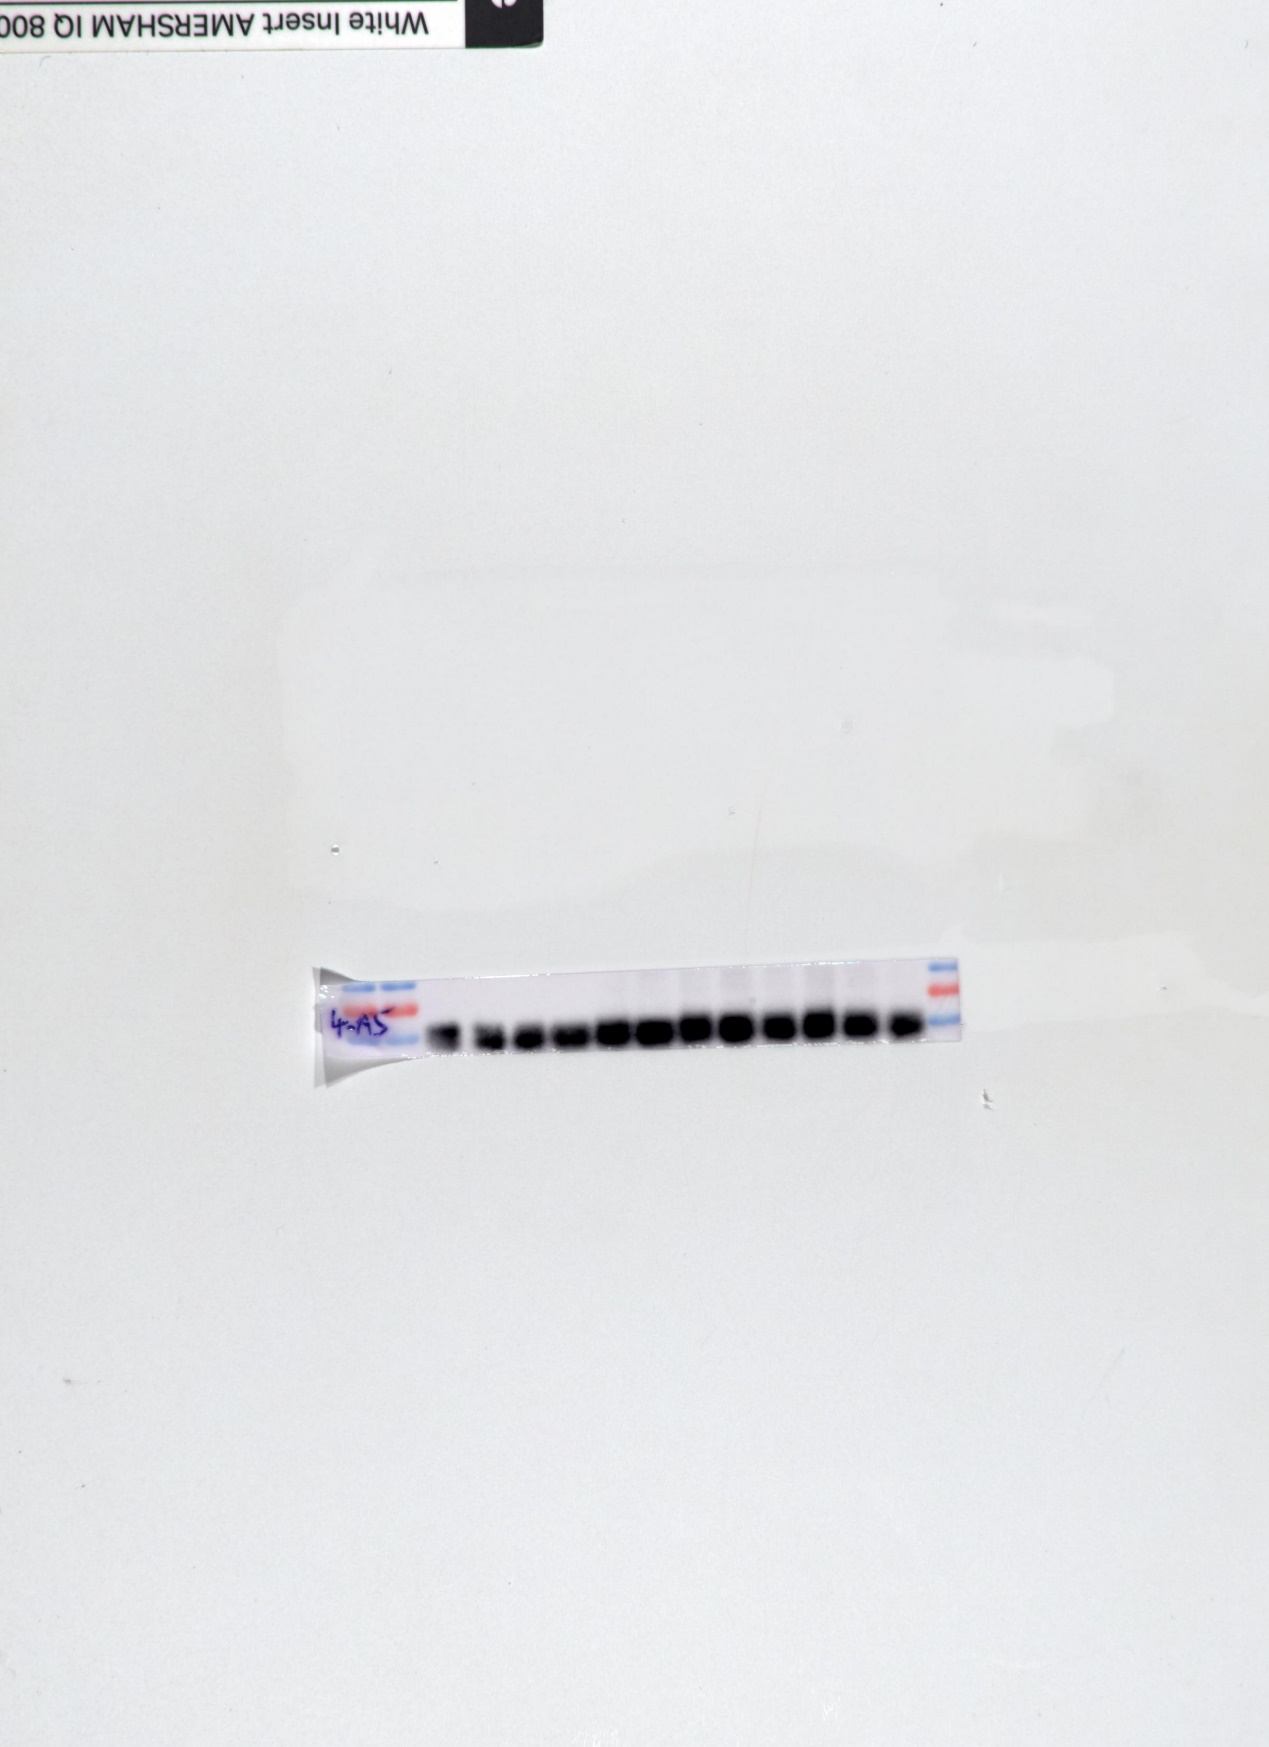


ATG5 55KDa


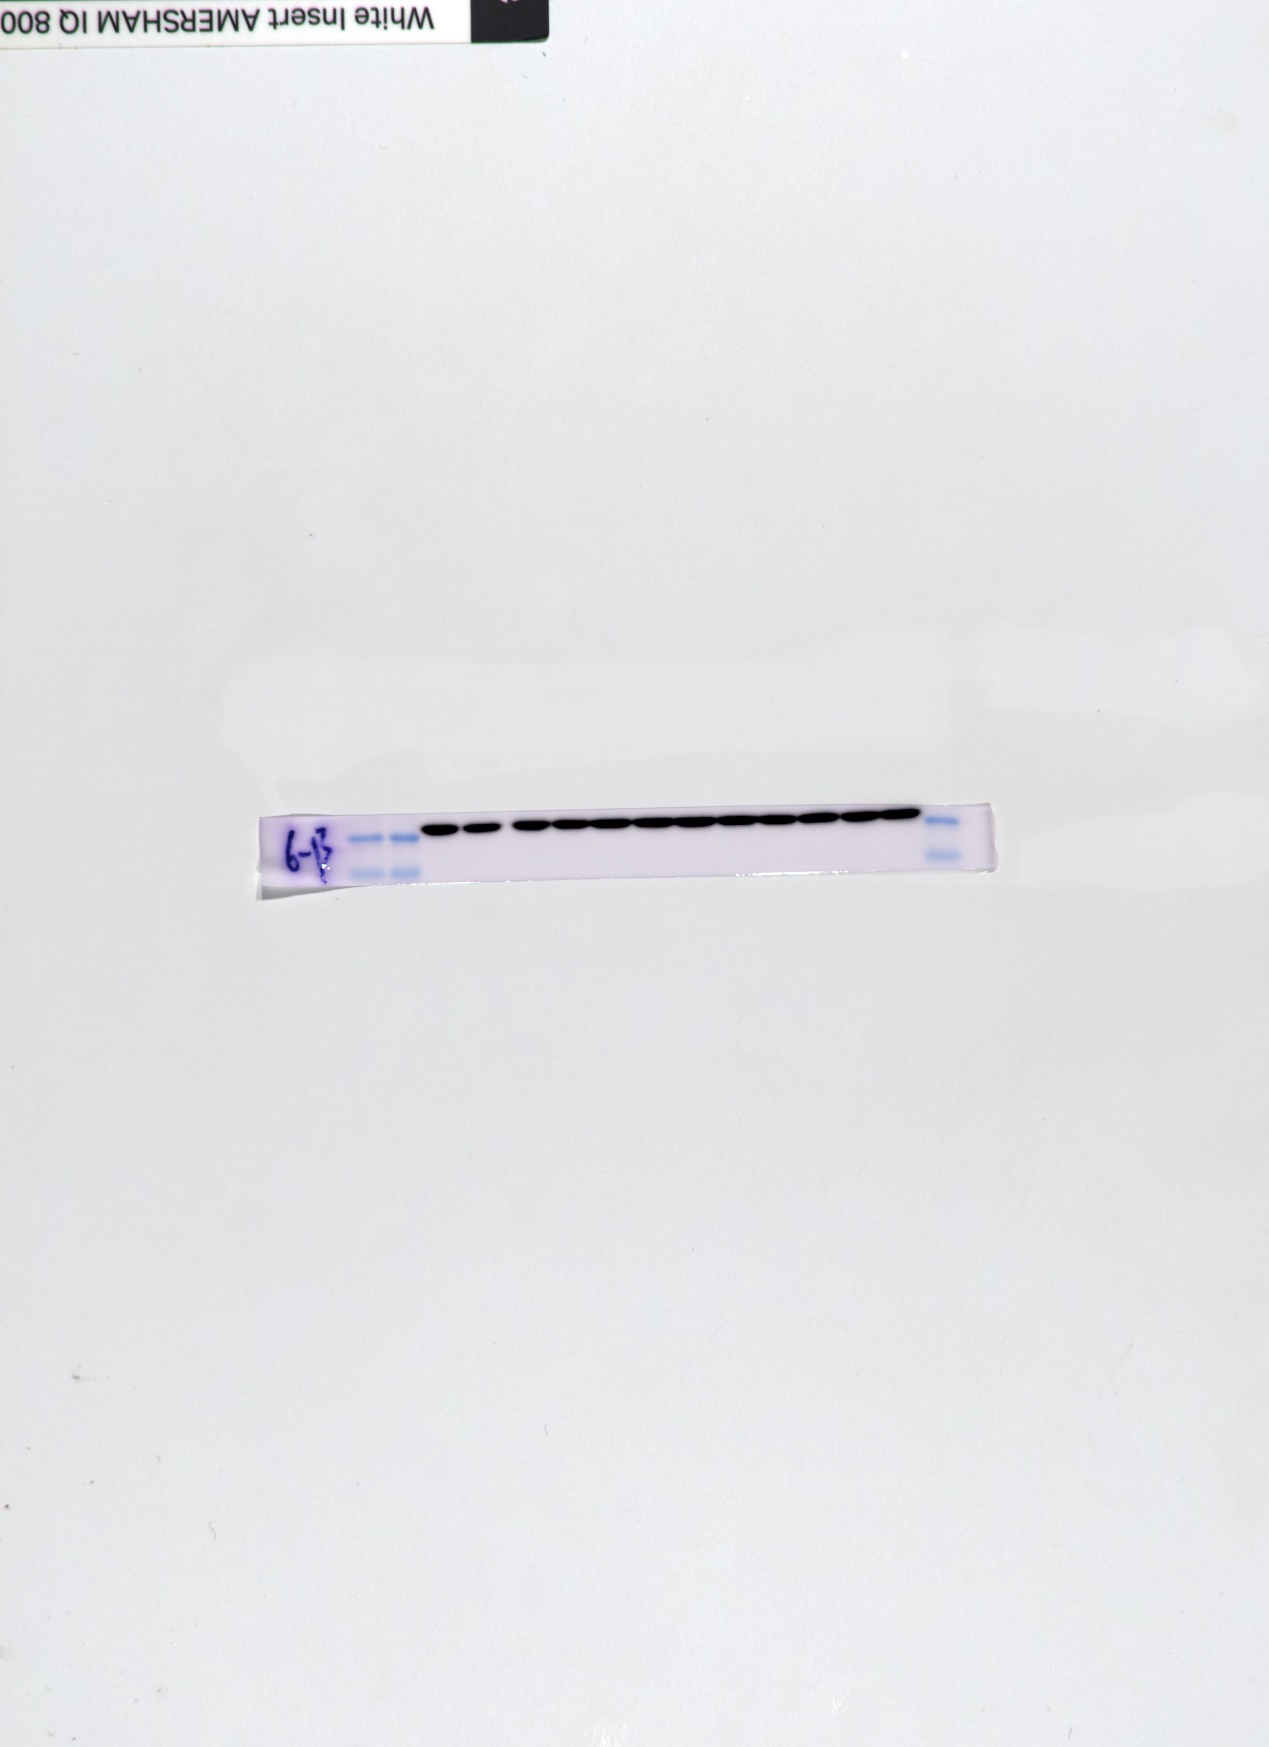


β-actin 42KDa


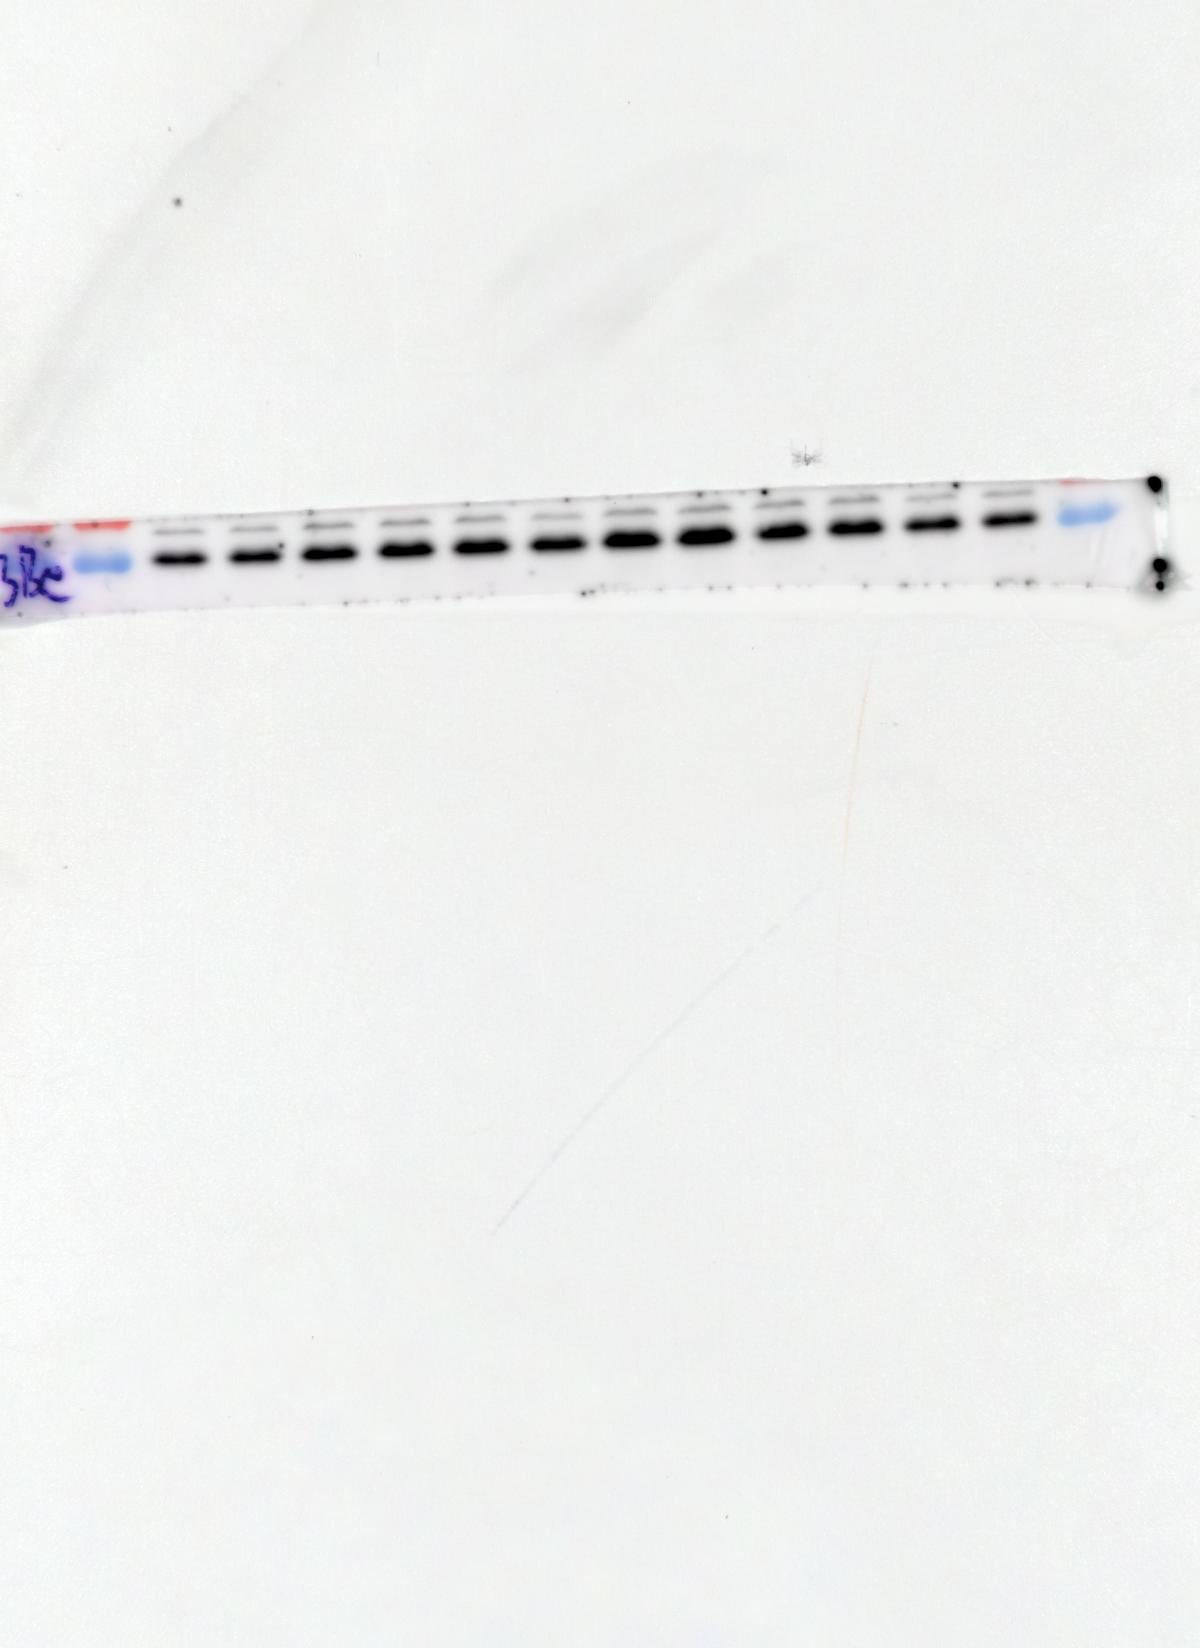


Beclin1 60KDa


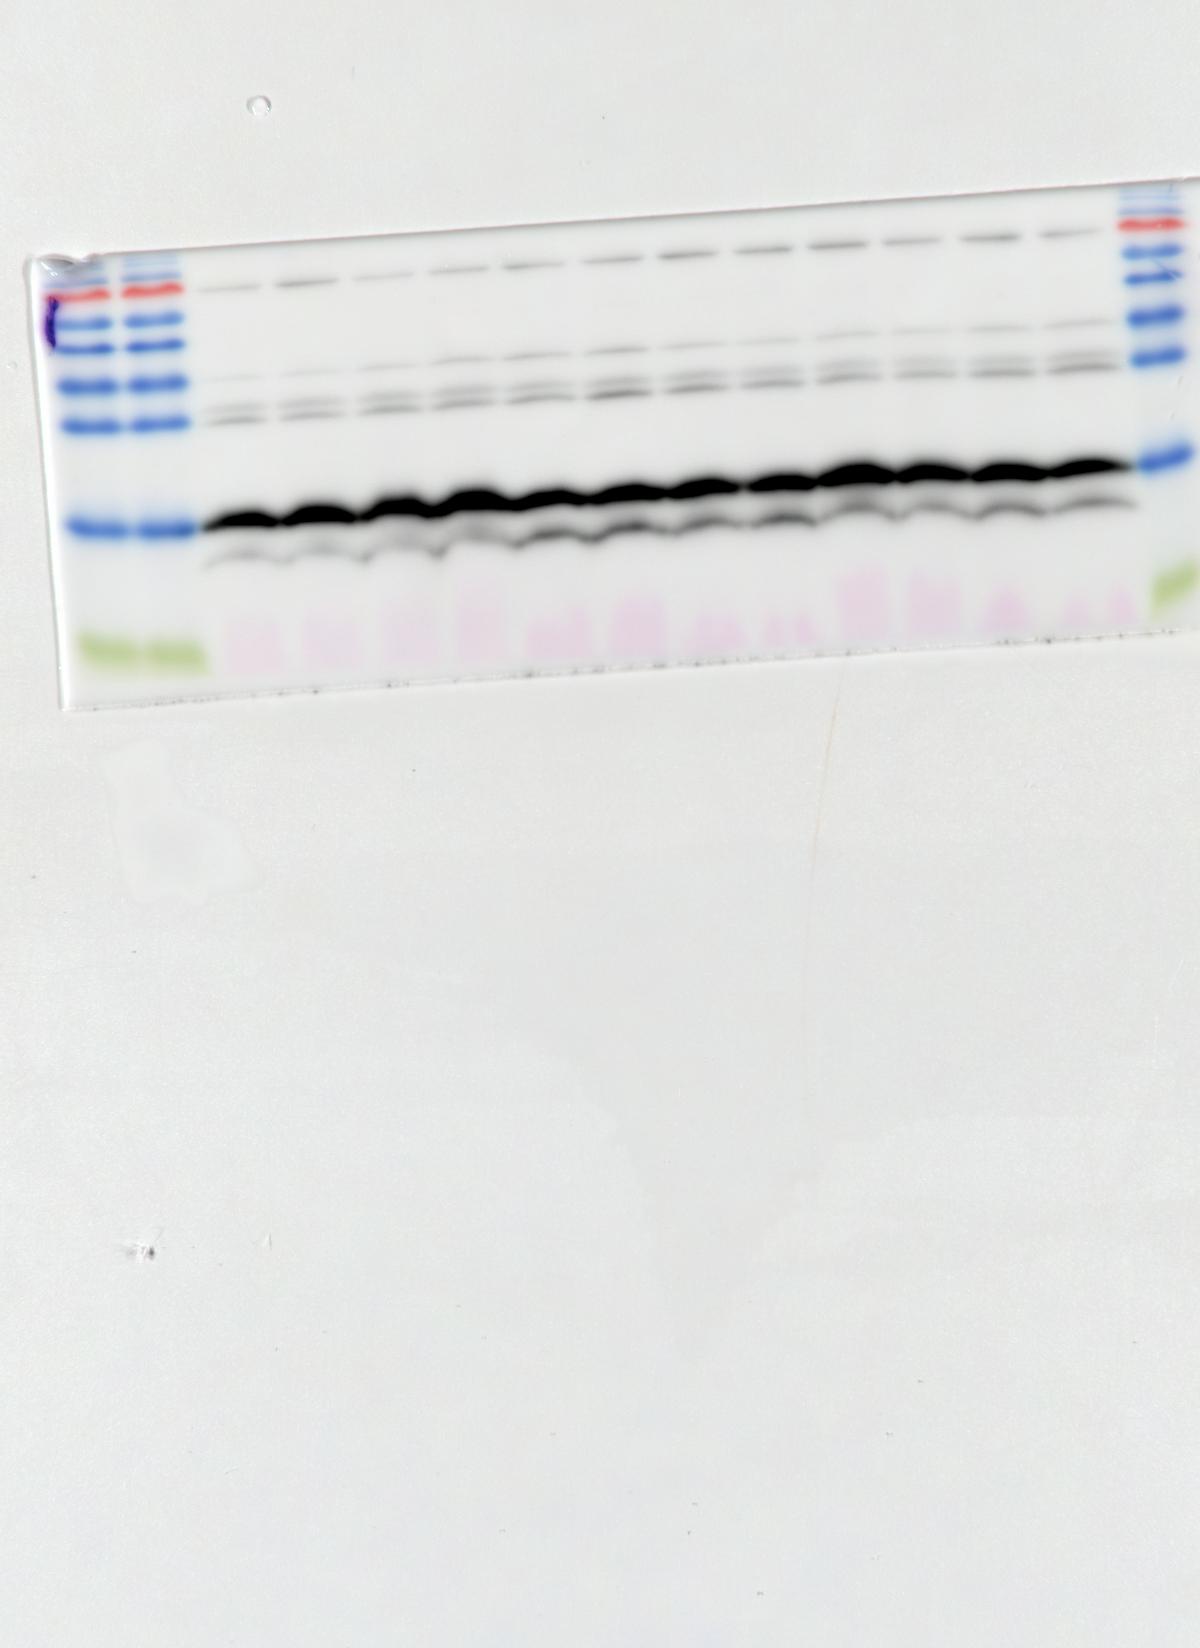


LC3B 14KDa


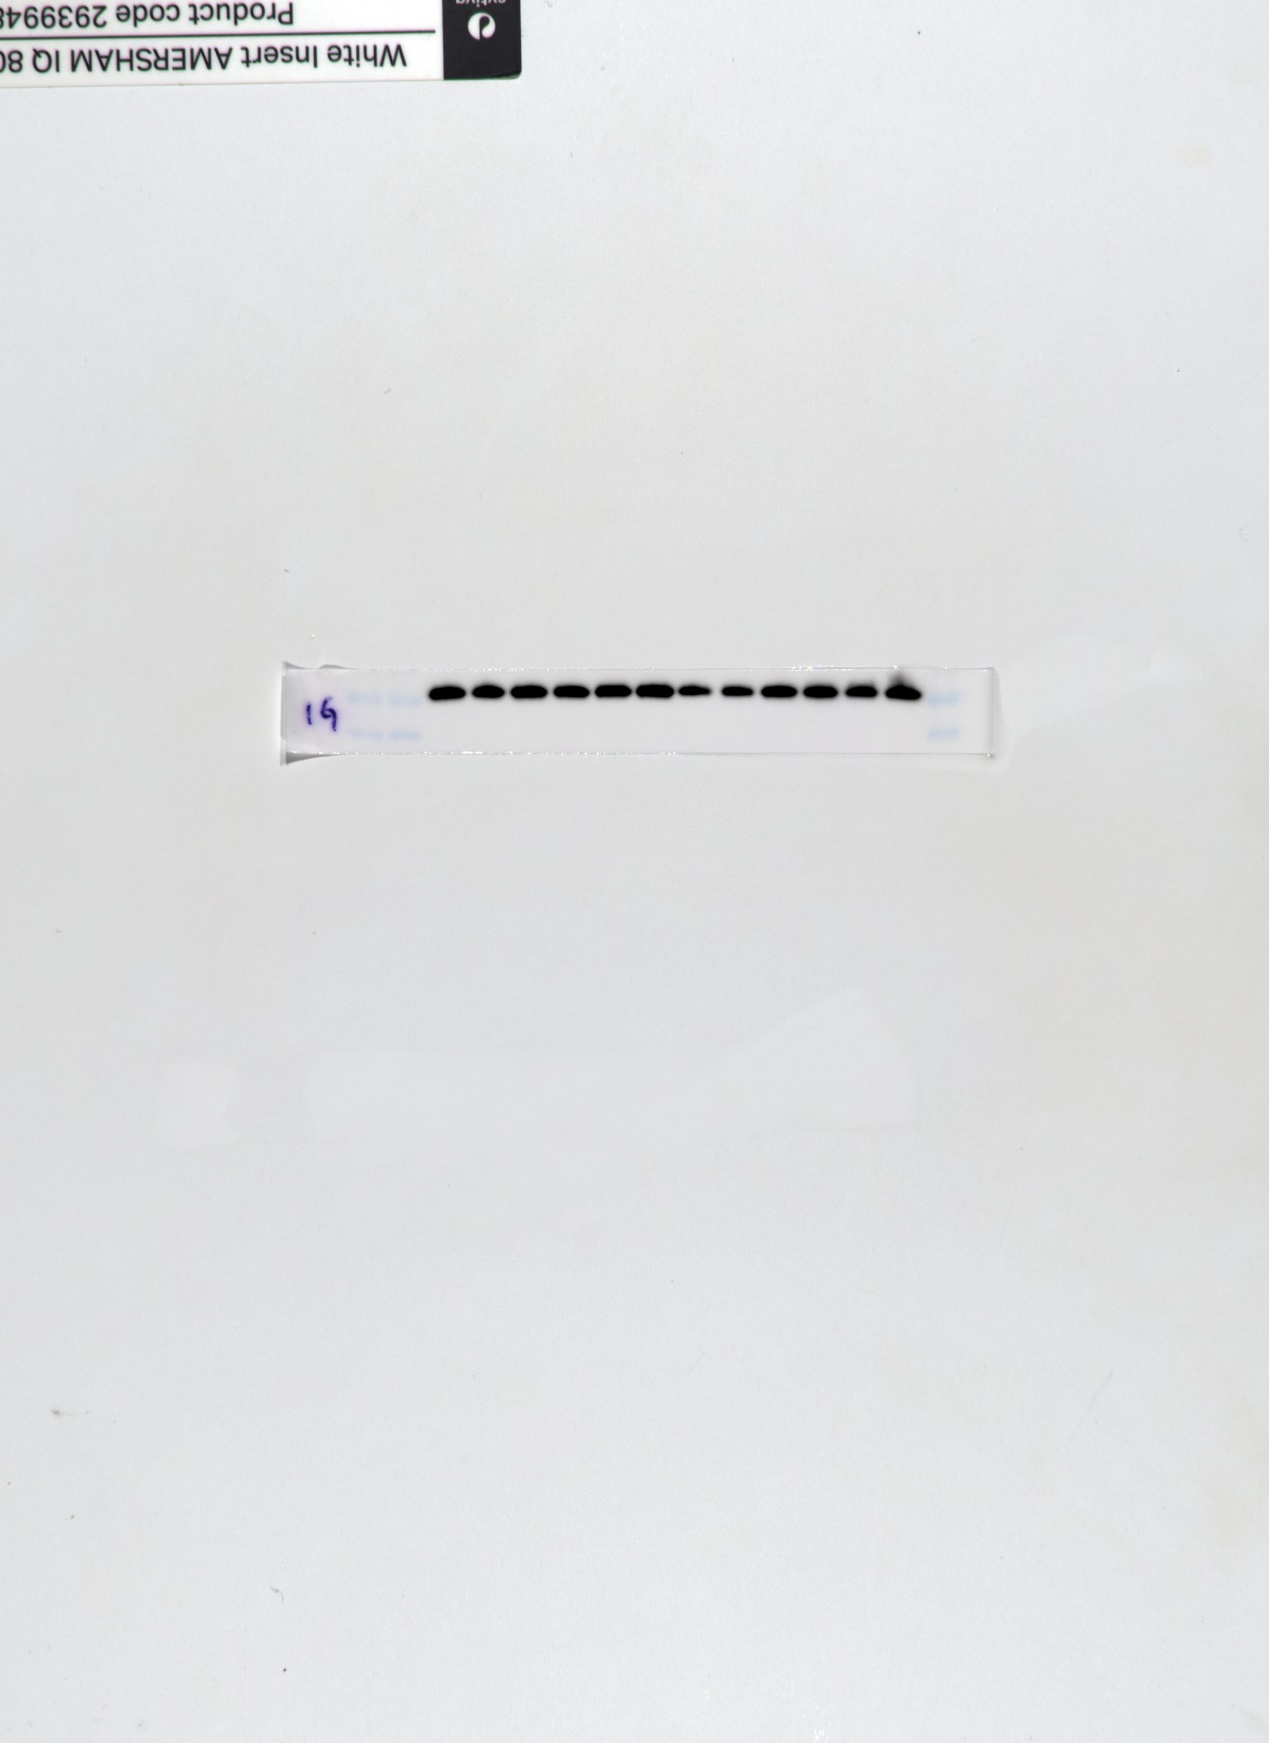


β-actin 42KDa


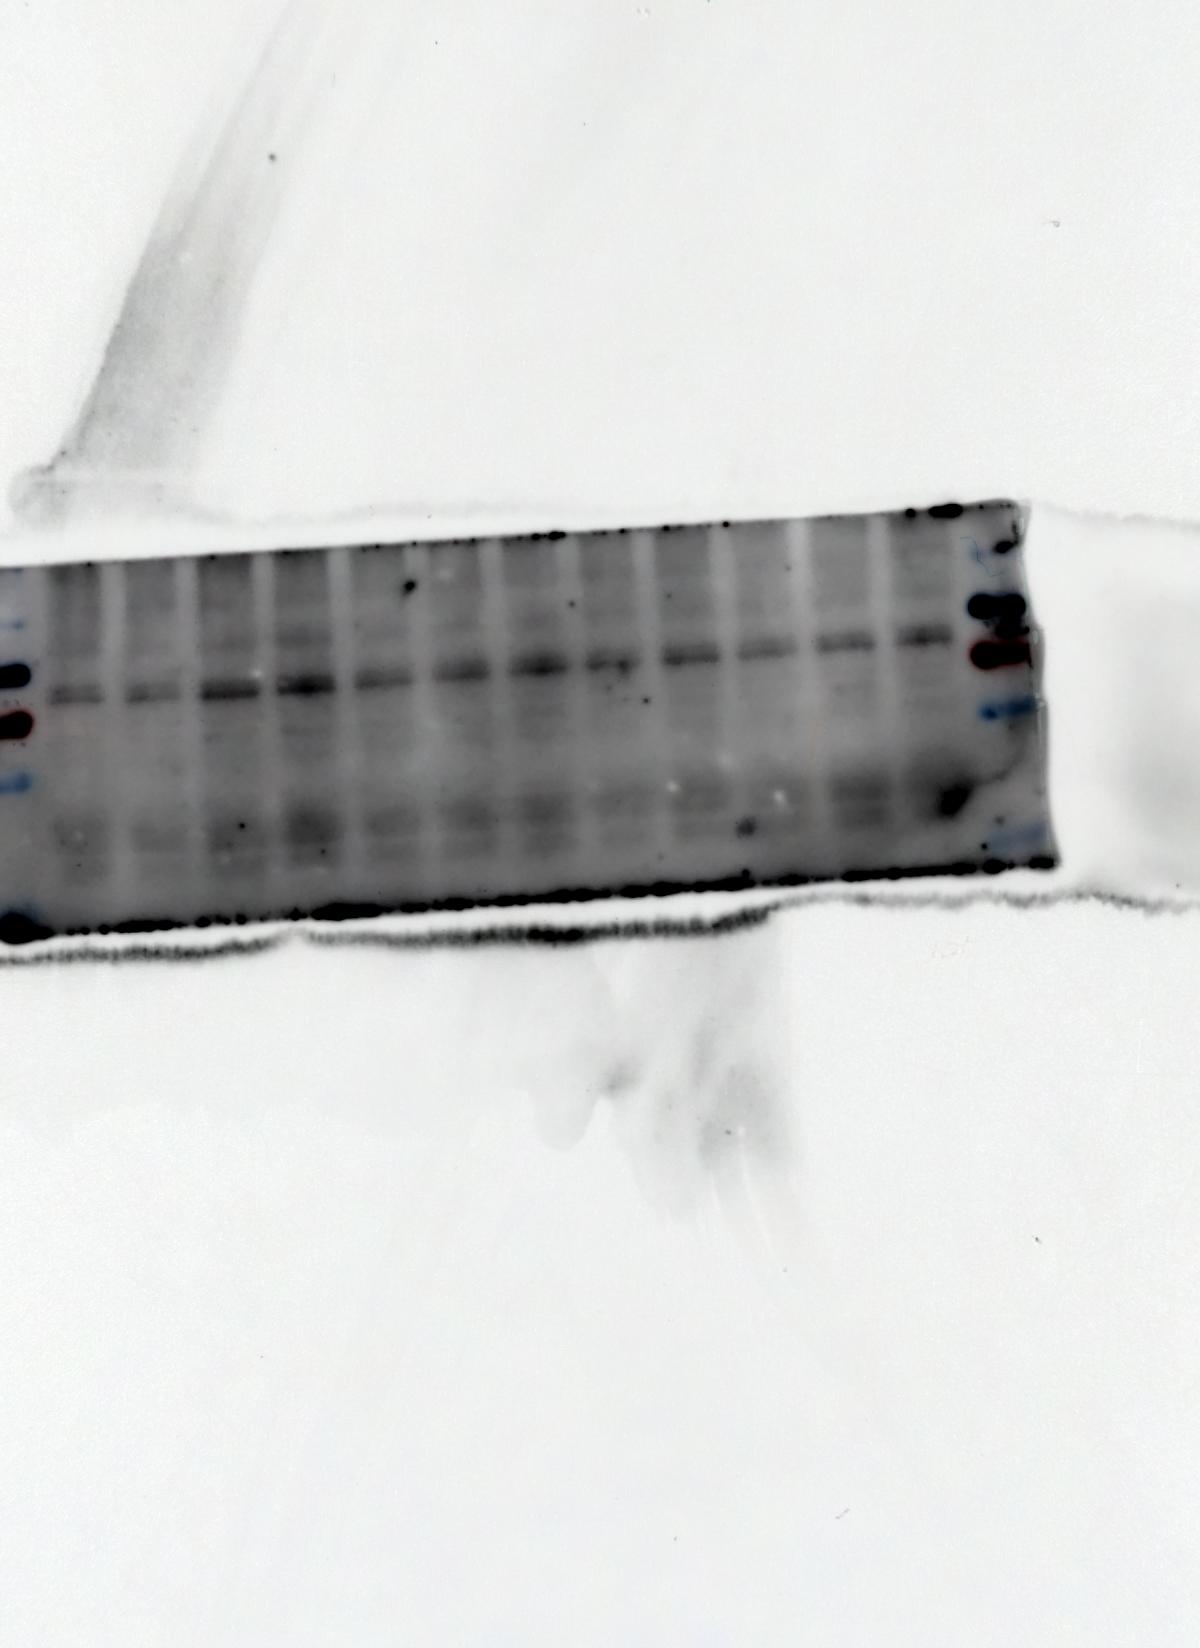


LAMP1 90KDa


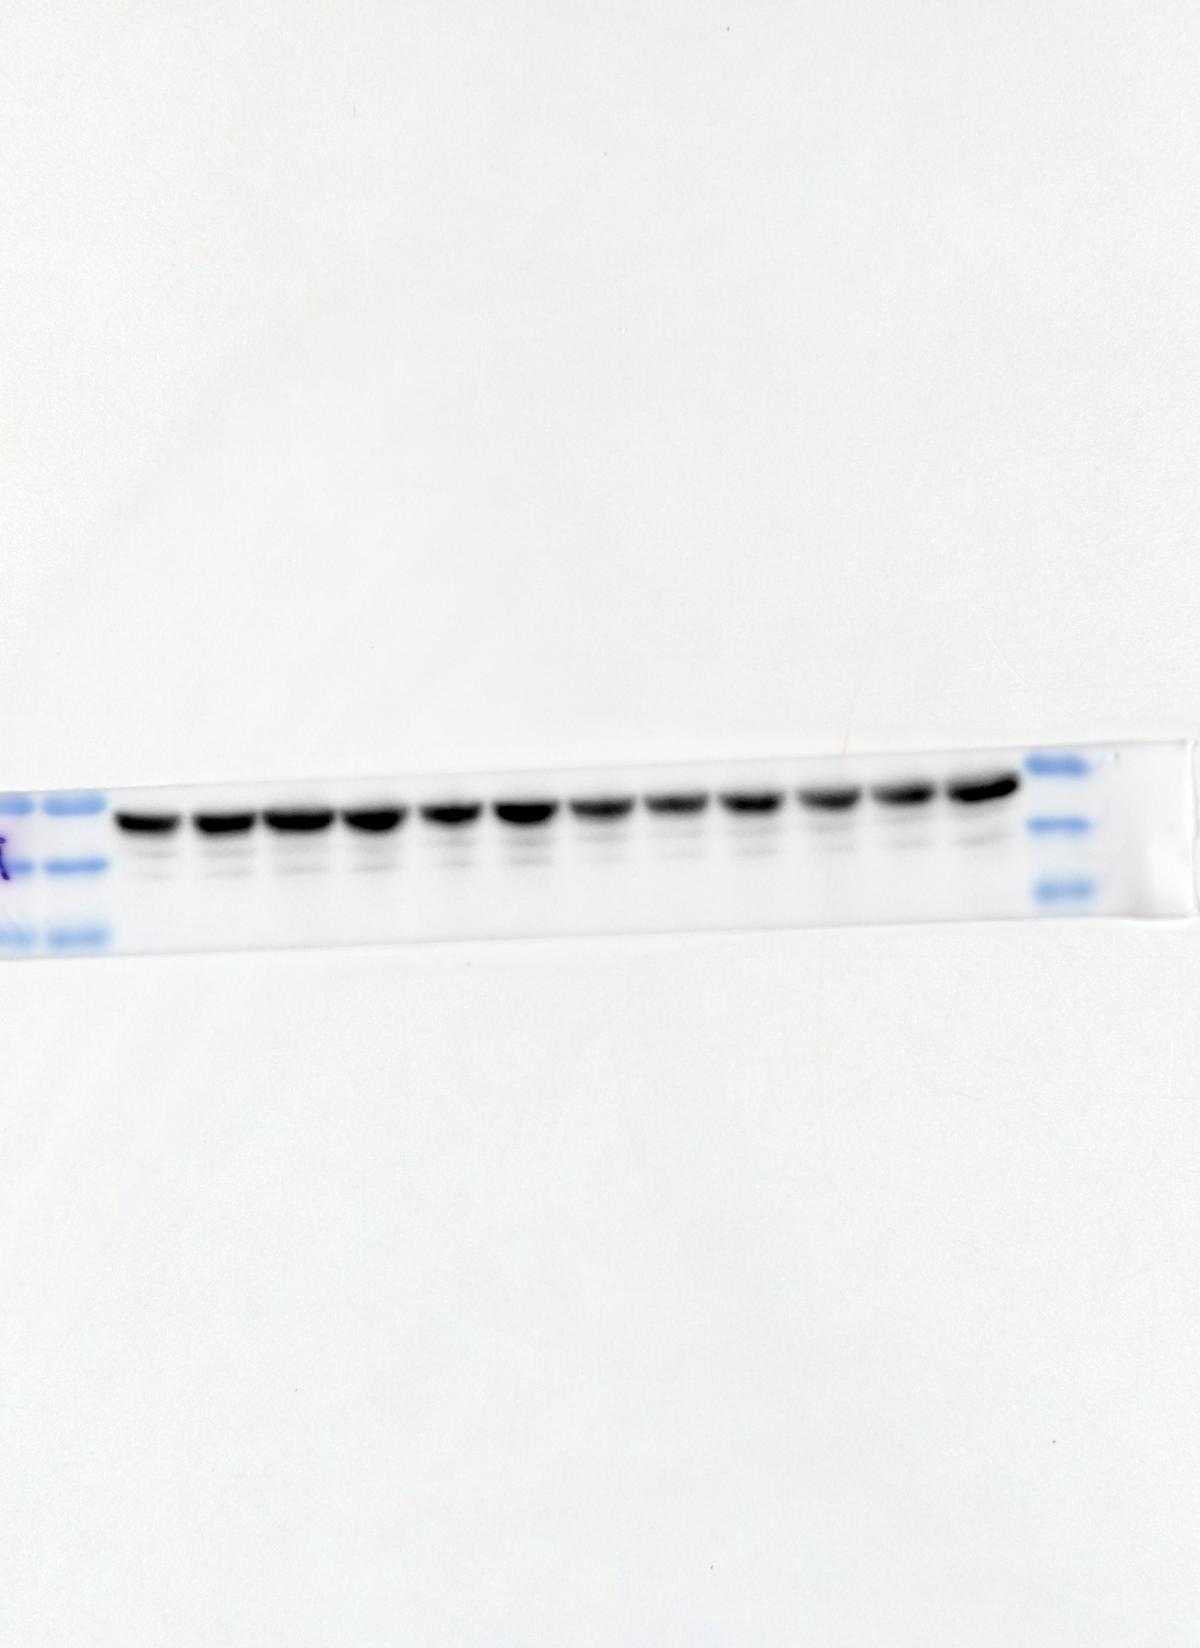


CTSD 43KDa


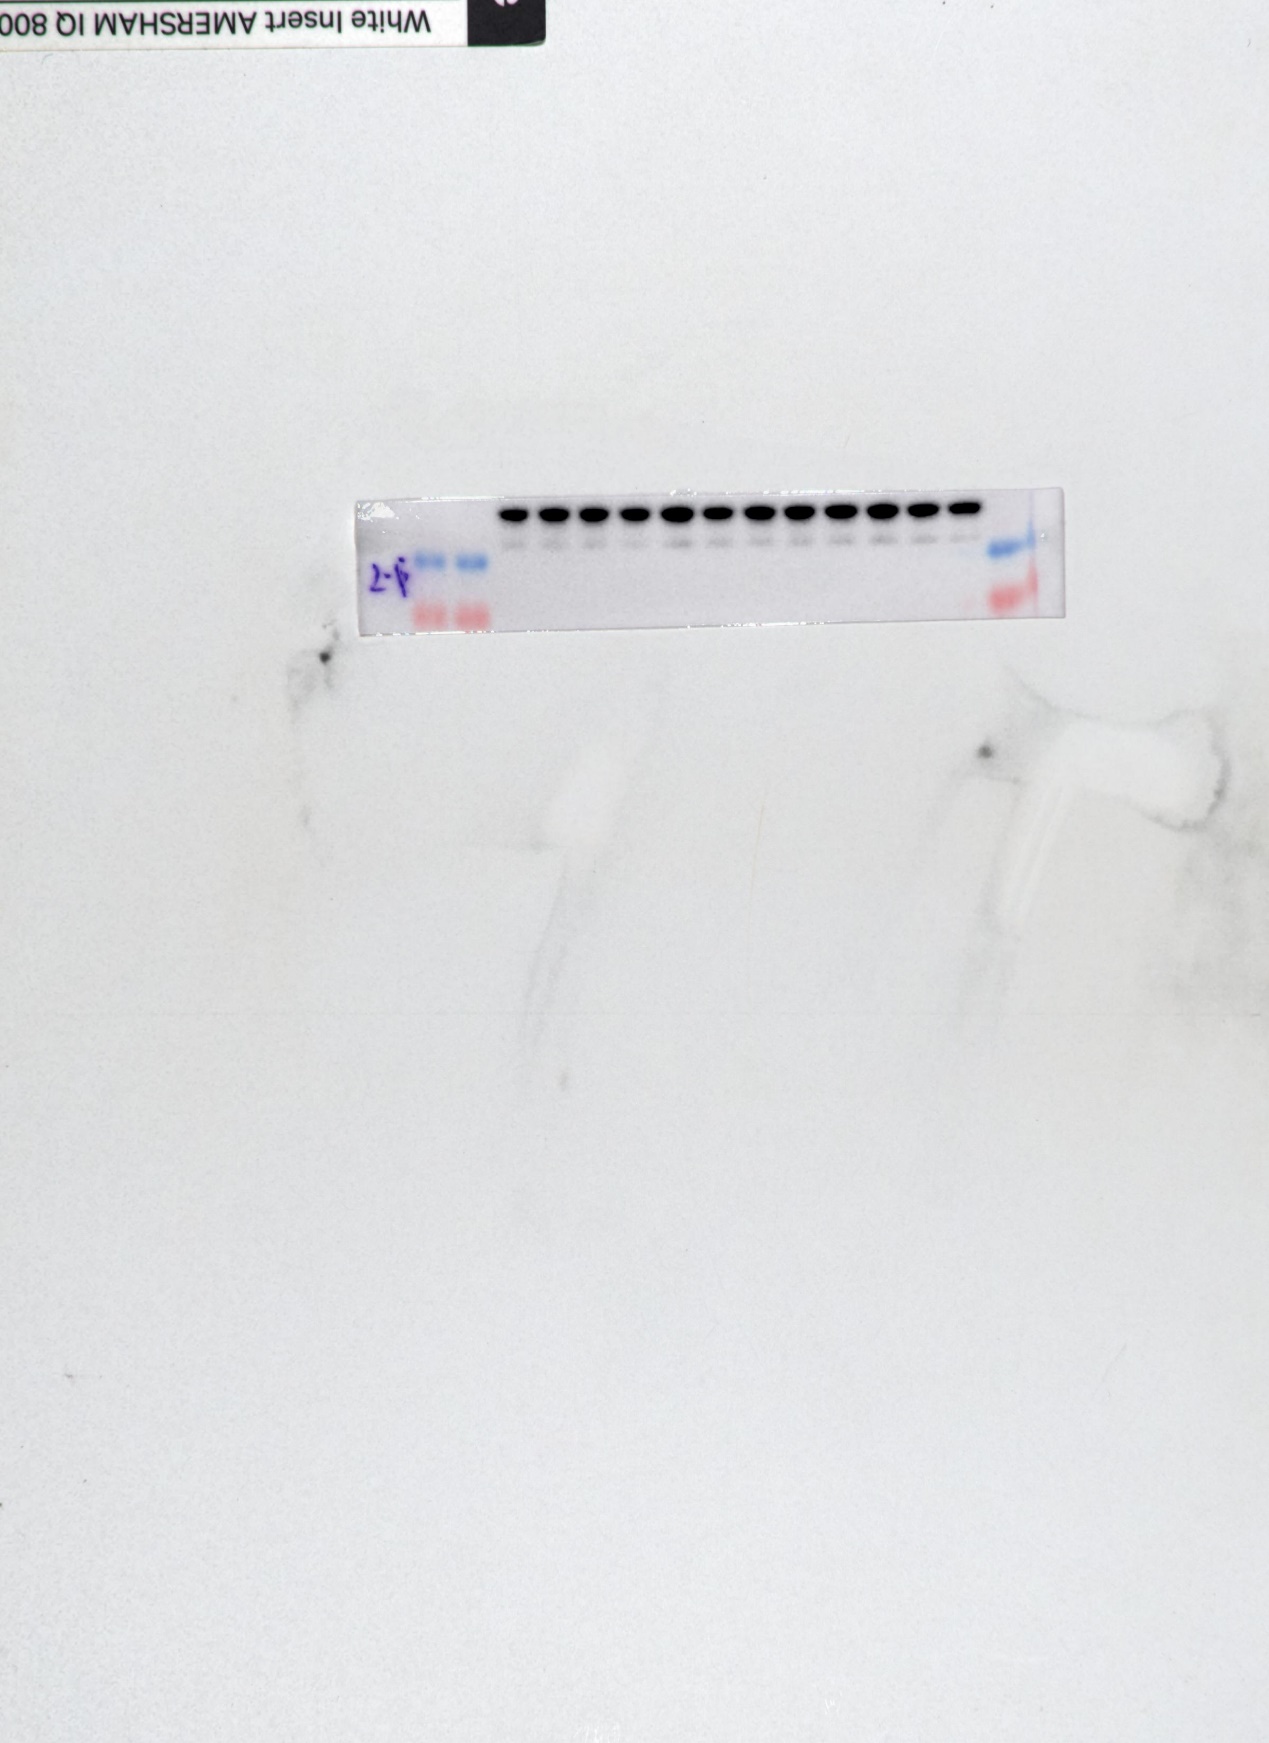


β-actin 42KDa


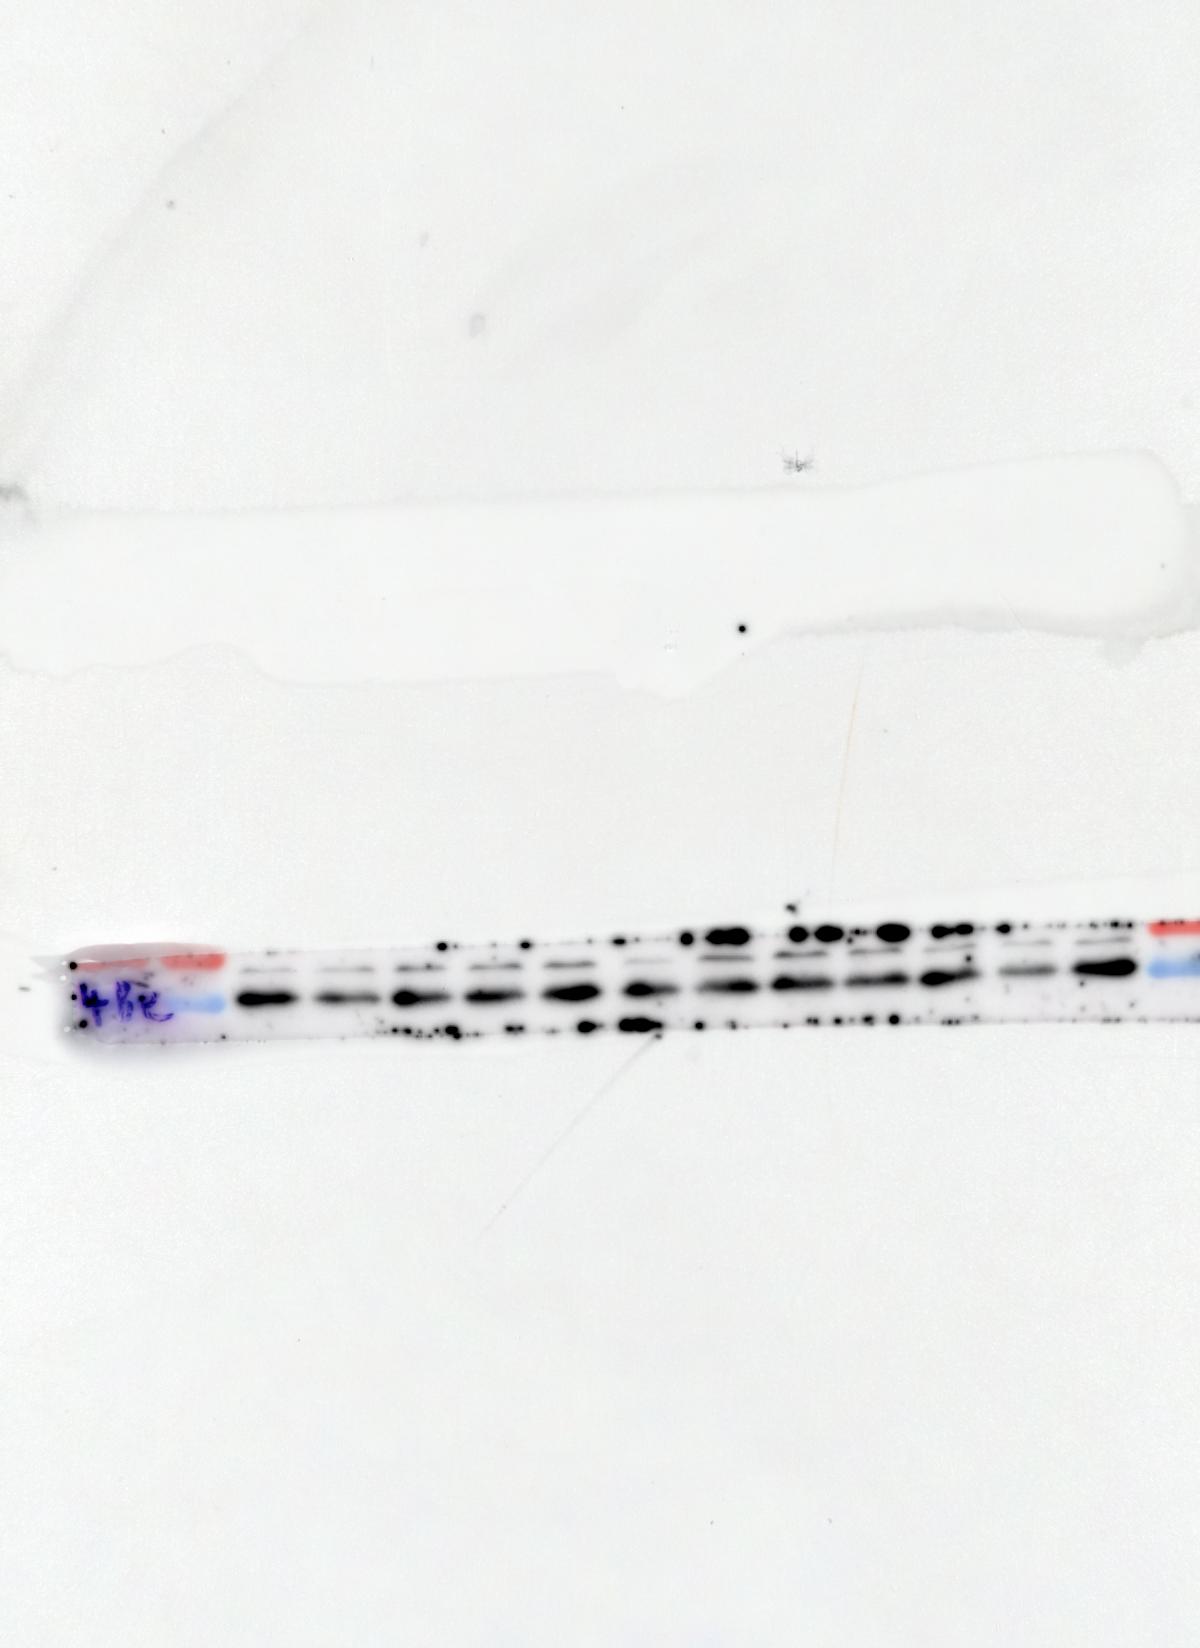


Beclin1 42KDa


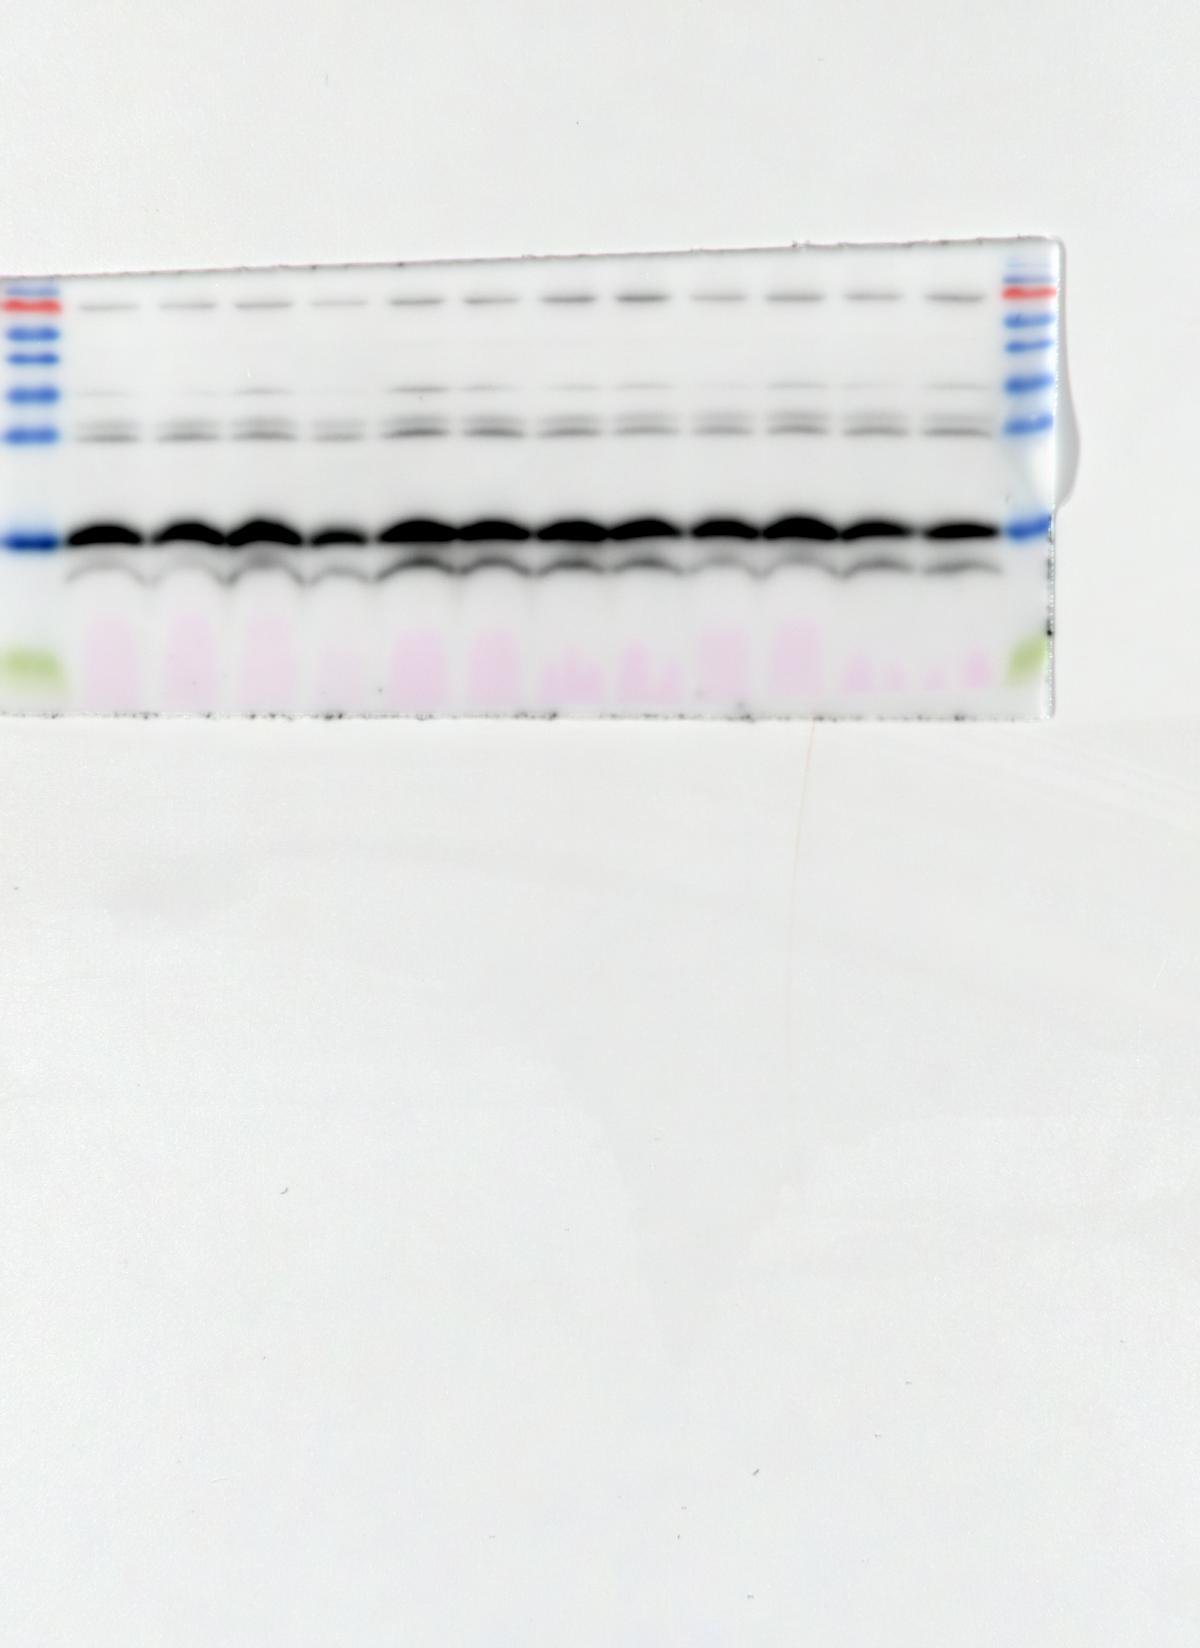


LC3B 14KDa


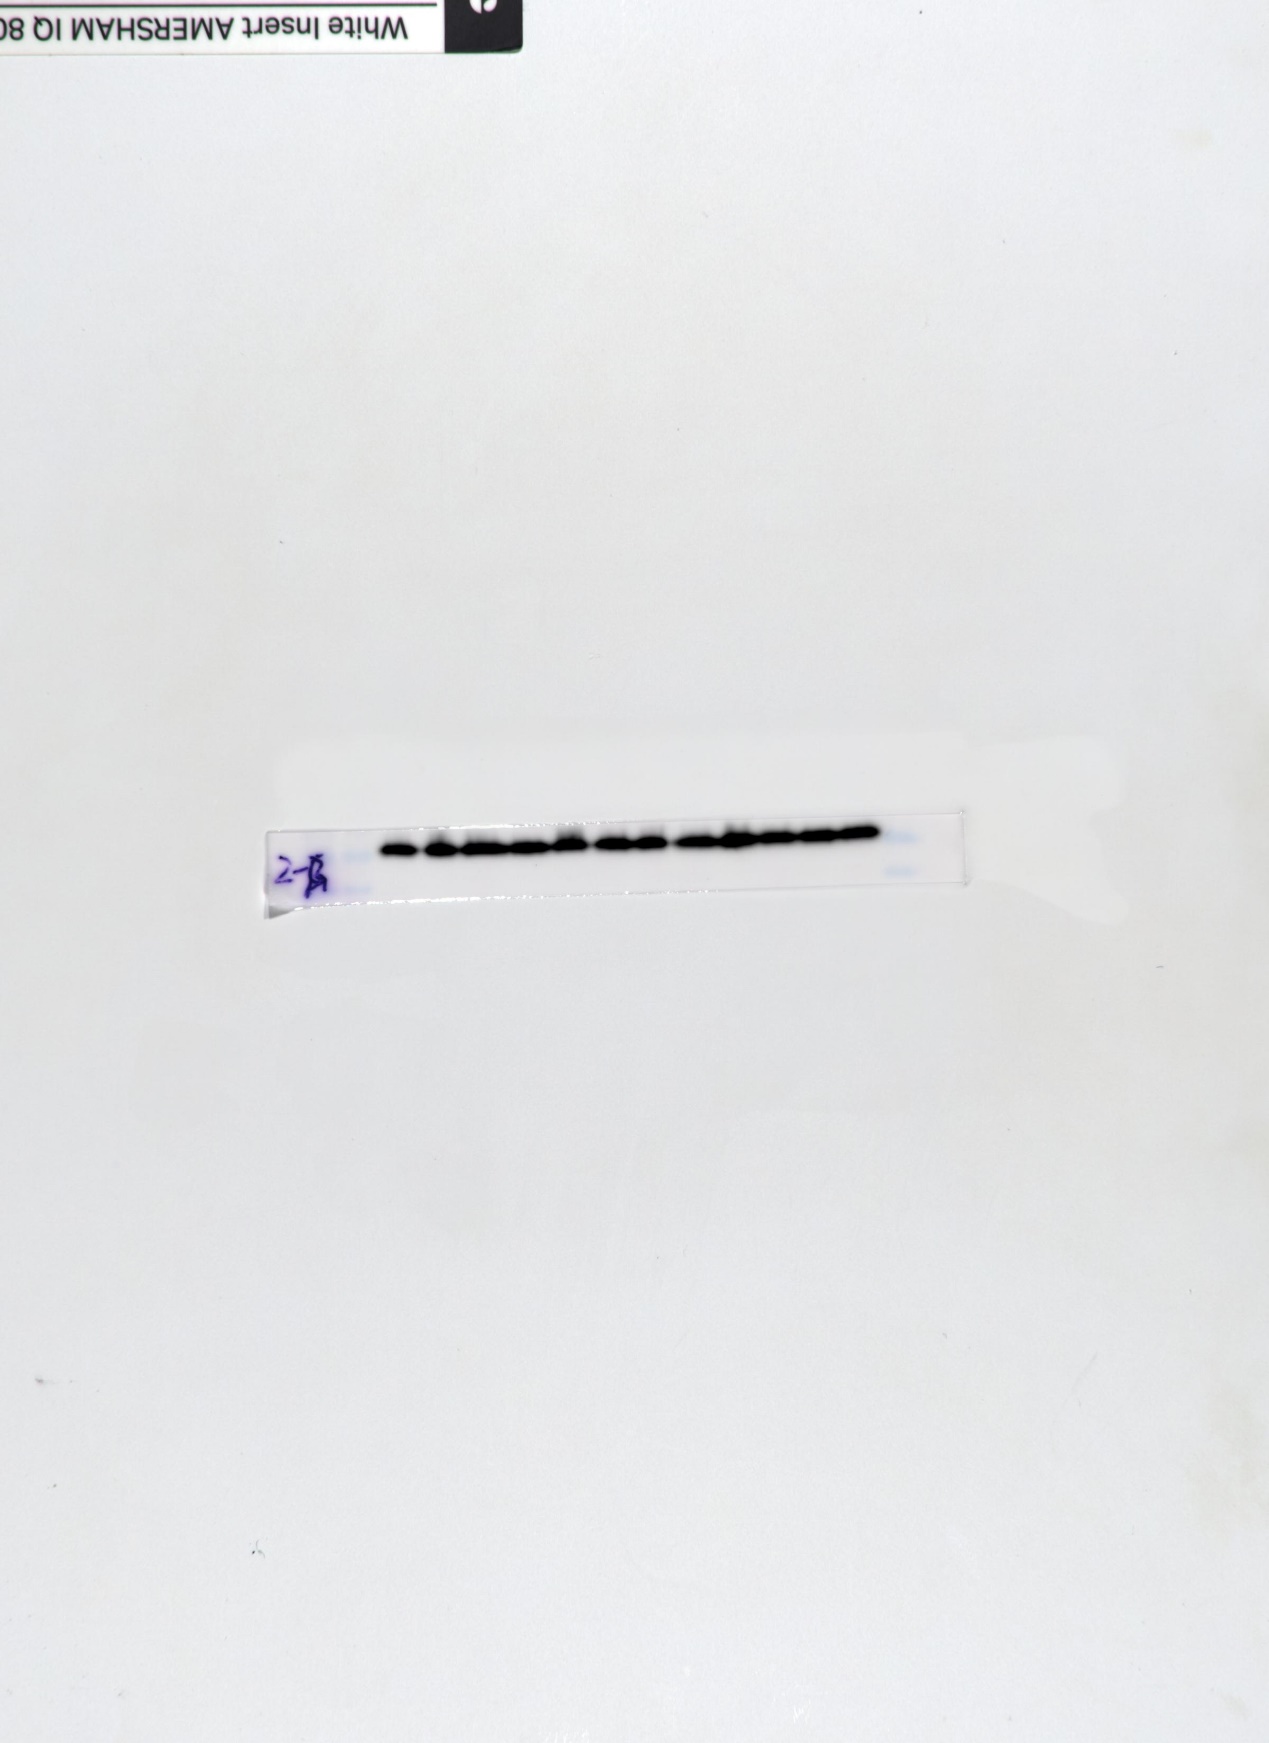


β-actin 42KDa


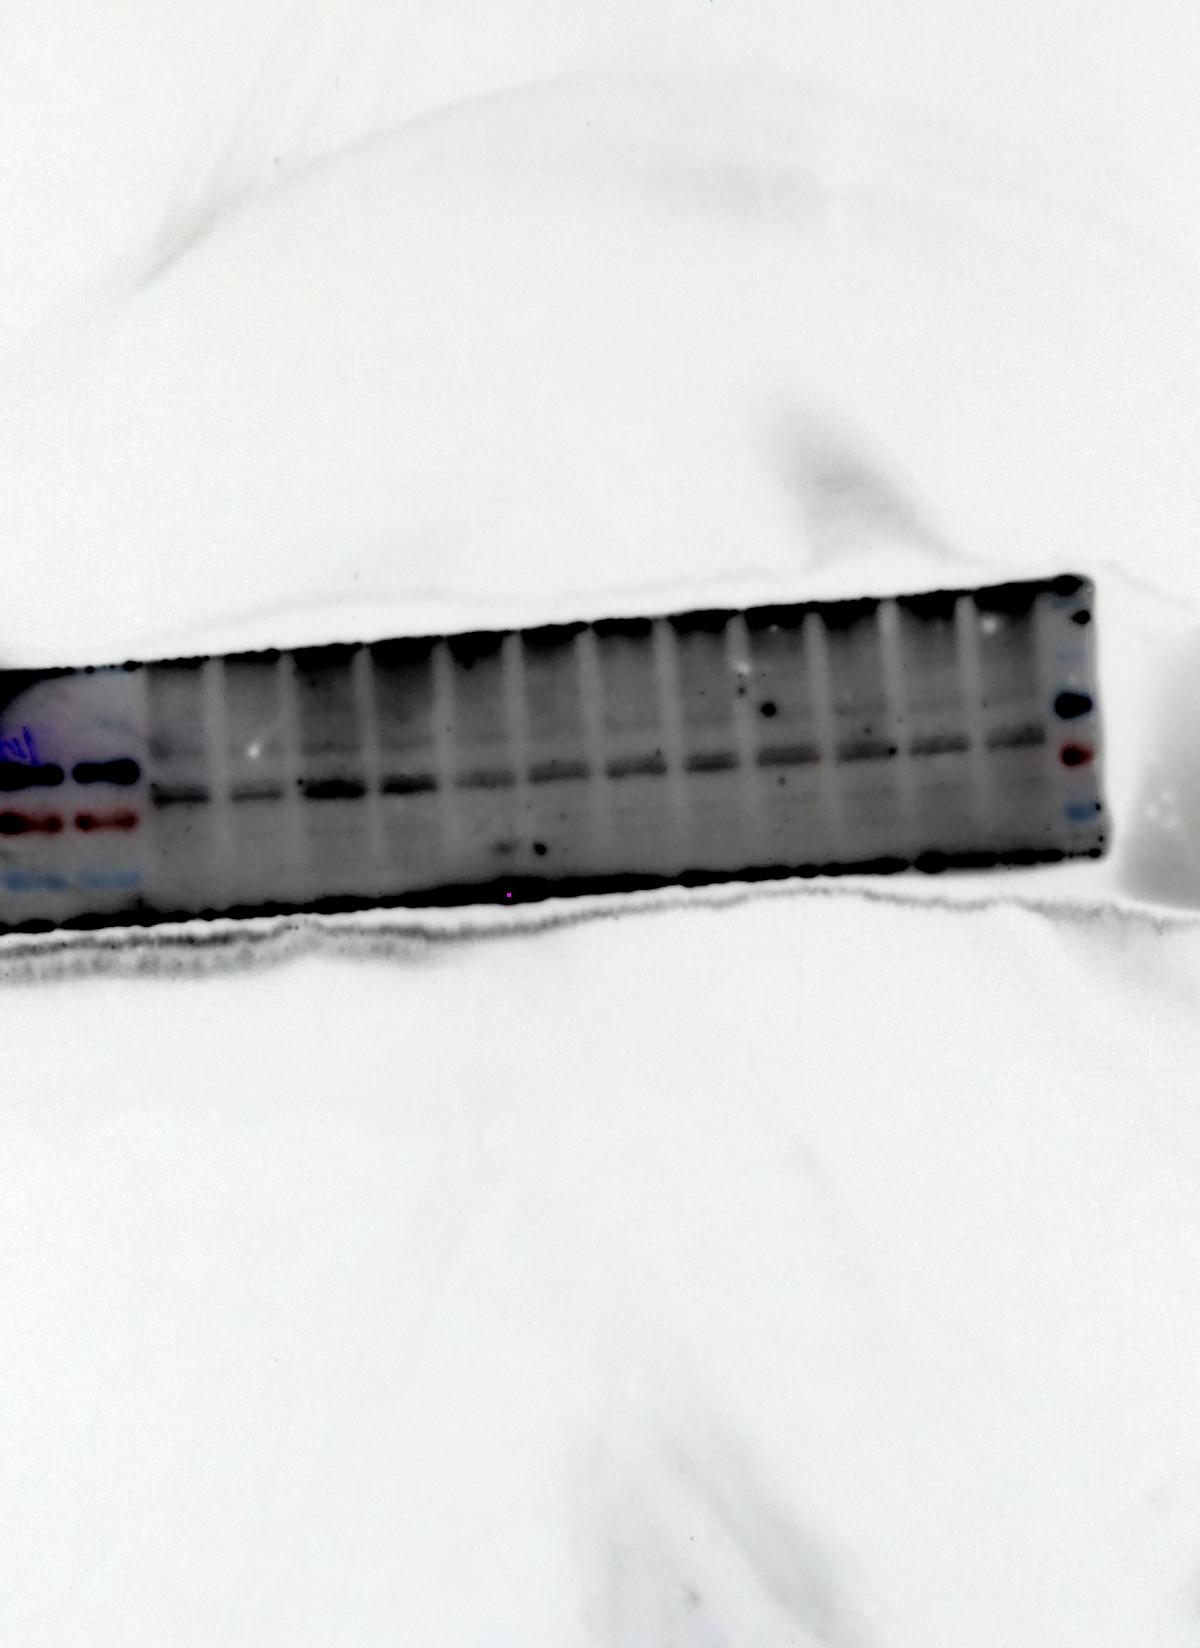


LAMP1 90KDa


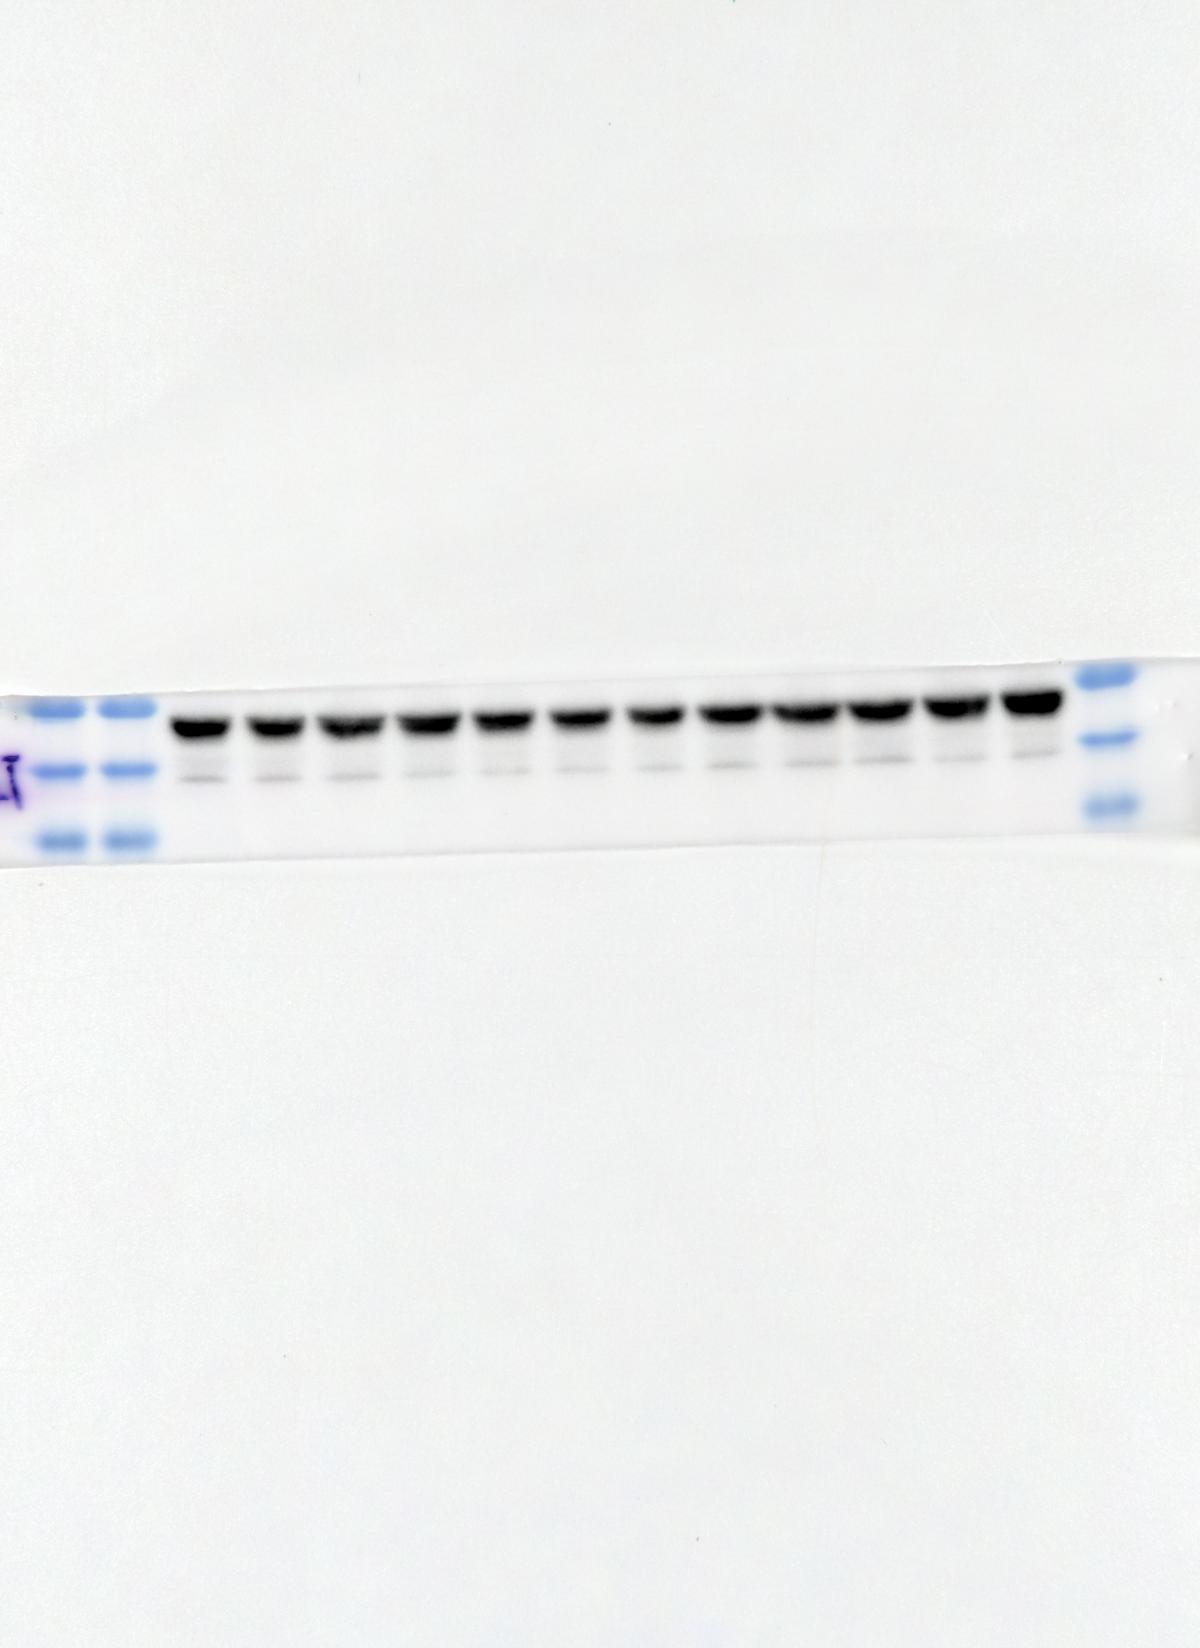


CTSD 43KDa


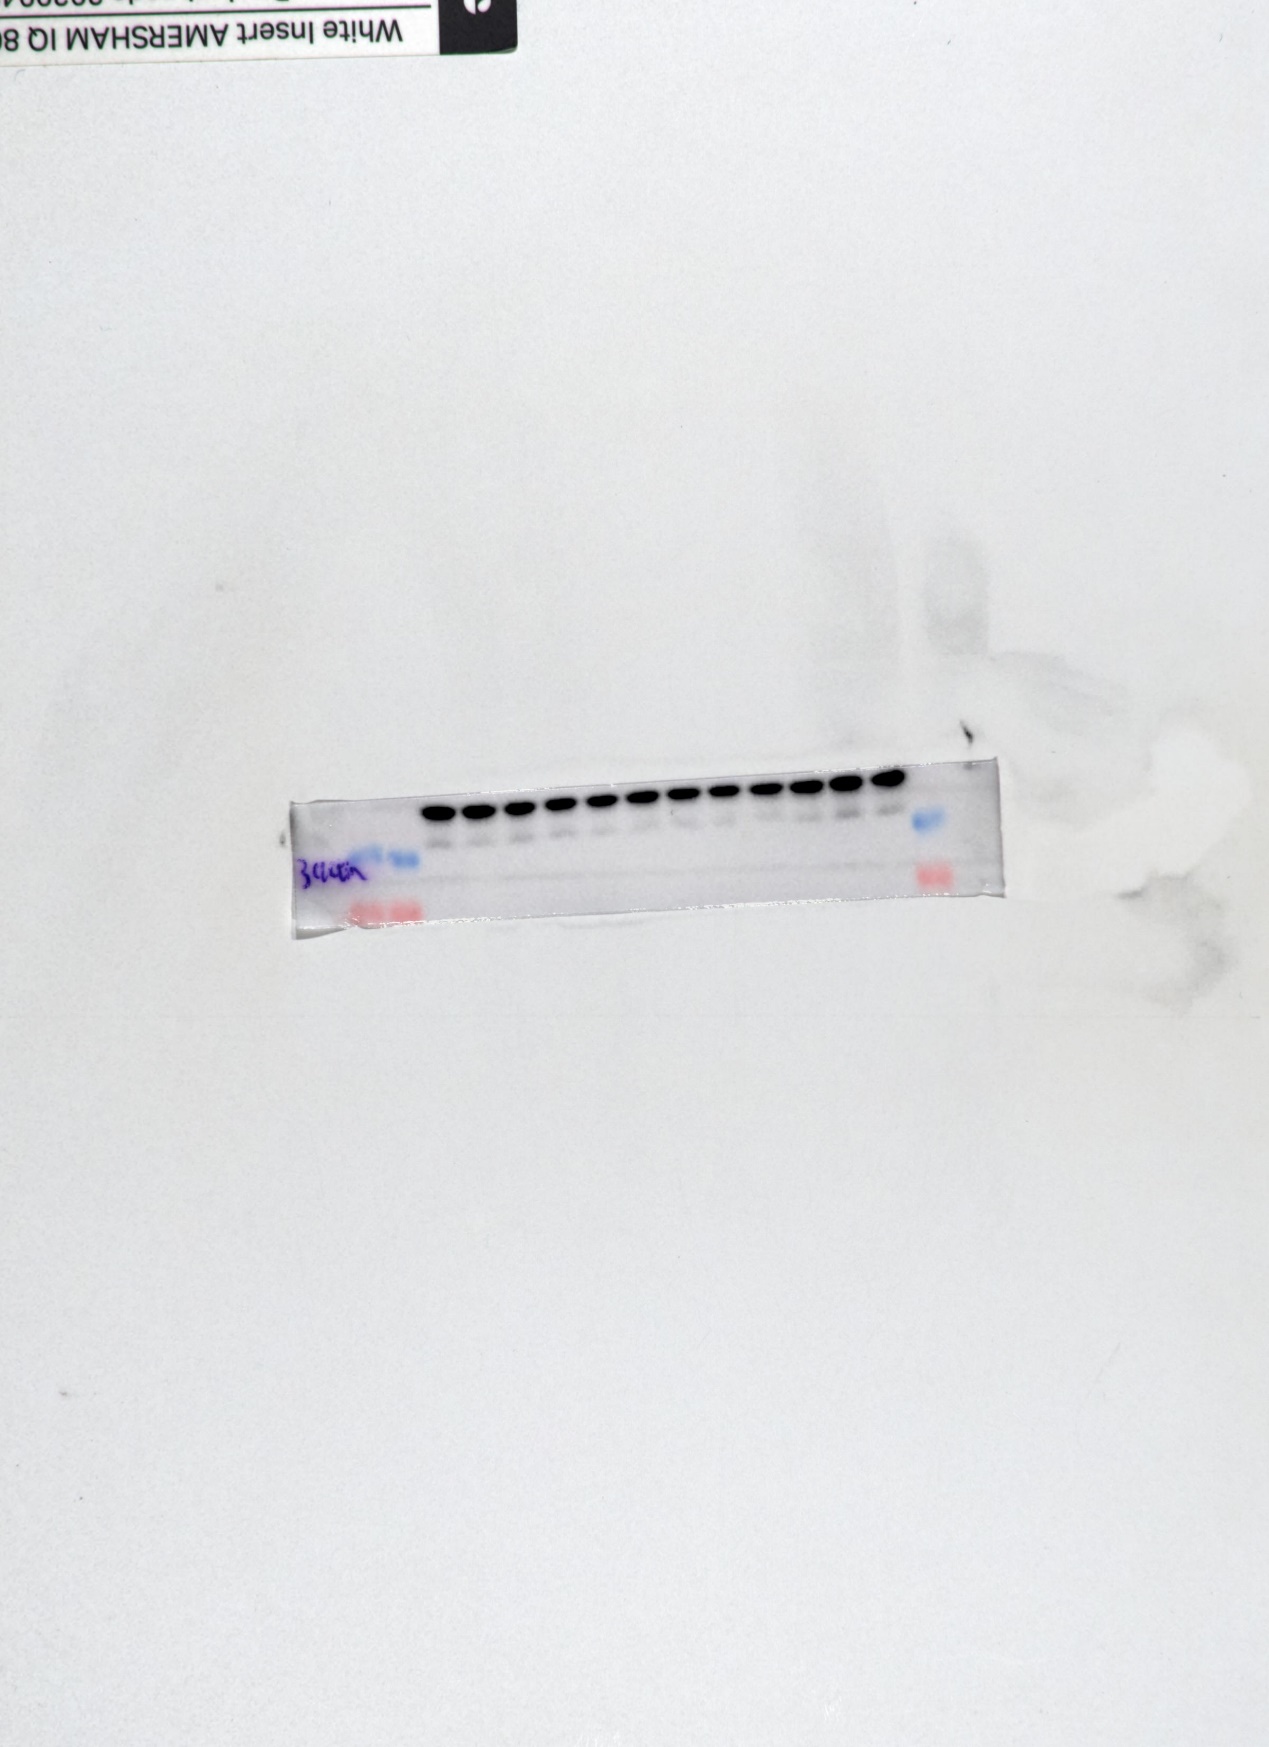


β-actin 42KDa

Figure 3. 3-MA reversed the effects of ARC-18 in promoting autophagy and regulating APP processing pathways in 5xFAD mice. (A) Original strip of western blot in autophagy pathways and APP processing pathways. Please refer to the manuscript for specific grouping and experimental conditions (n=4).
