# Supplementary material for: A novel arctigenin derivative ameliorates memory impairment and pathologies by activating adiponectin receptor 1-mediated autophagy and regulating amyloid precursor protein processing of Alzheimer's disease
Source: Research Square preprint supplement (doi:10.21203/rs.3.rs-7035906/v1), 2025-08-22
Supplement: Supplementary file 3 [file aec75ddfdd2d8a413e44d285.docx]

Figure 6A


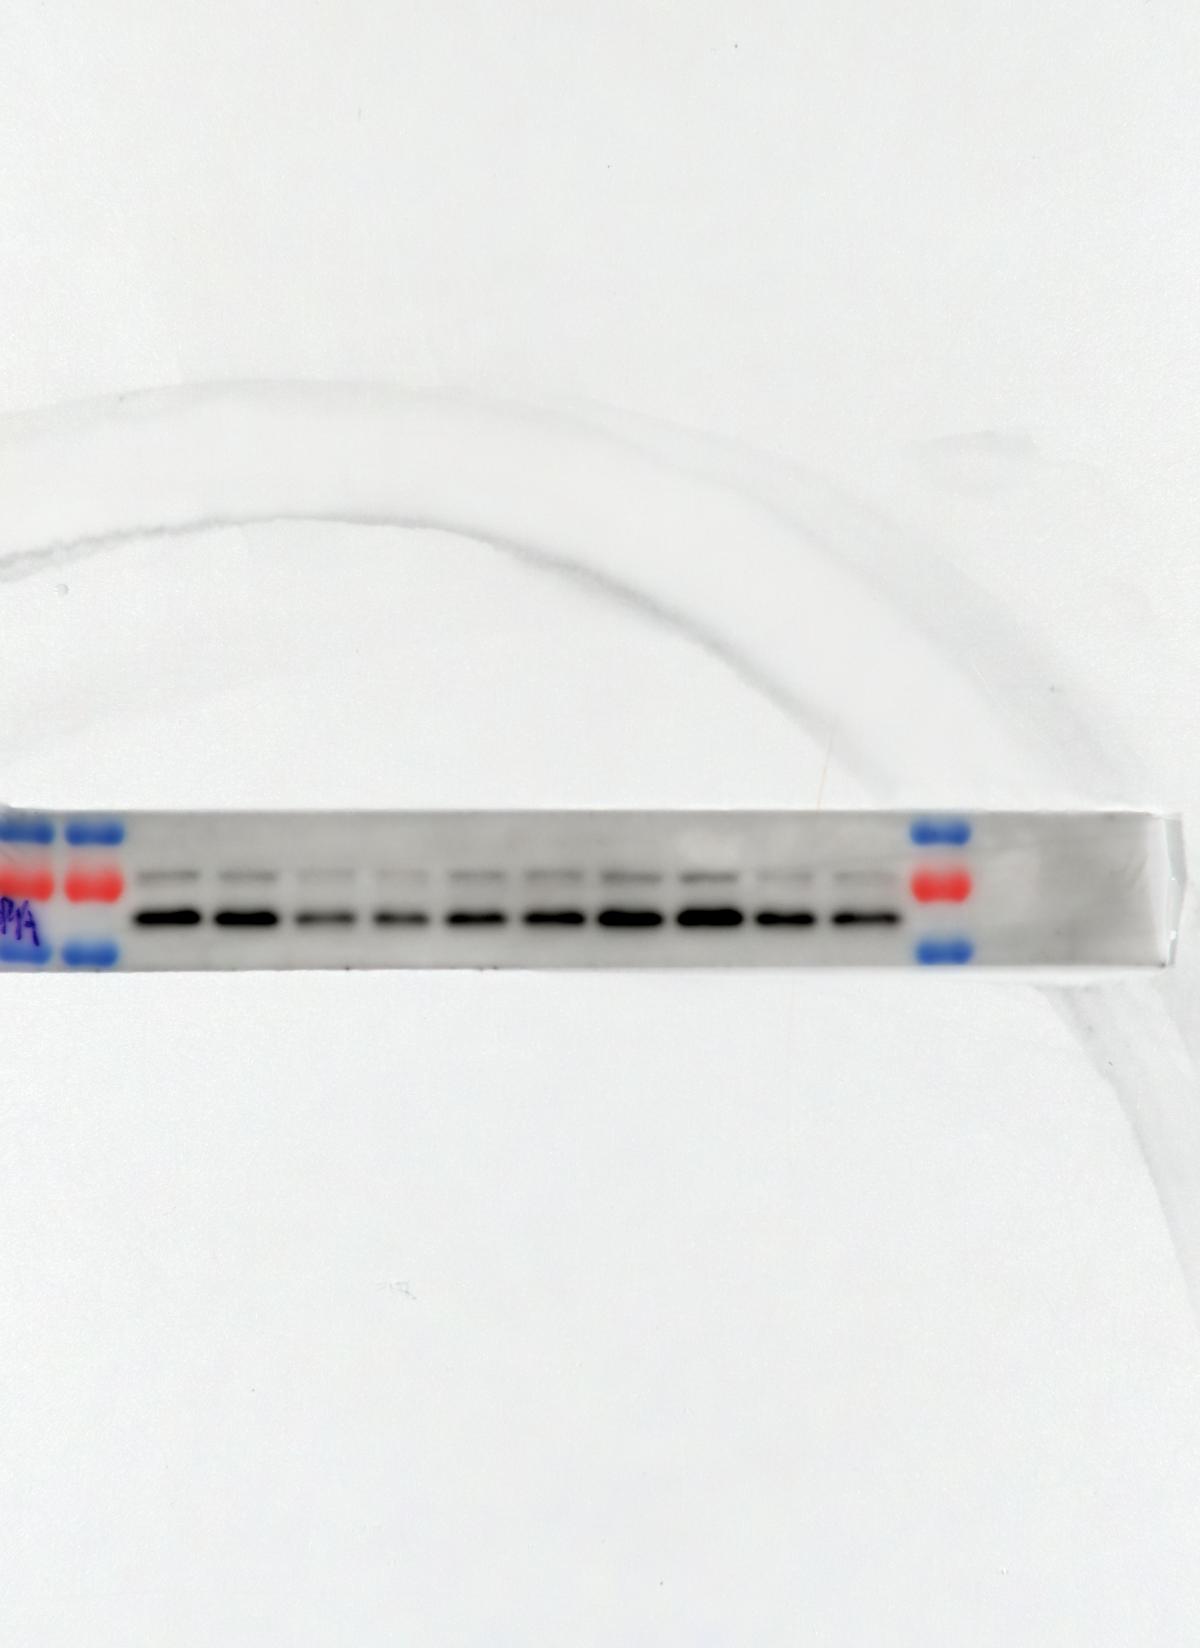


p-AMPK 62KDa


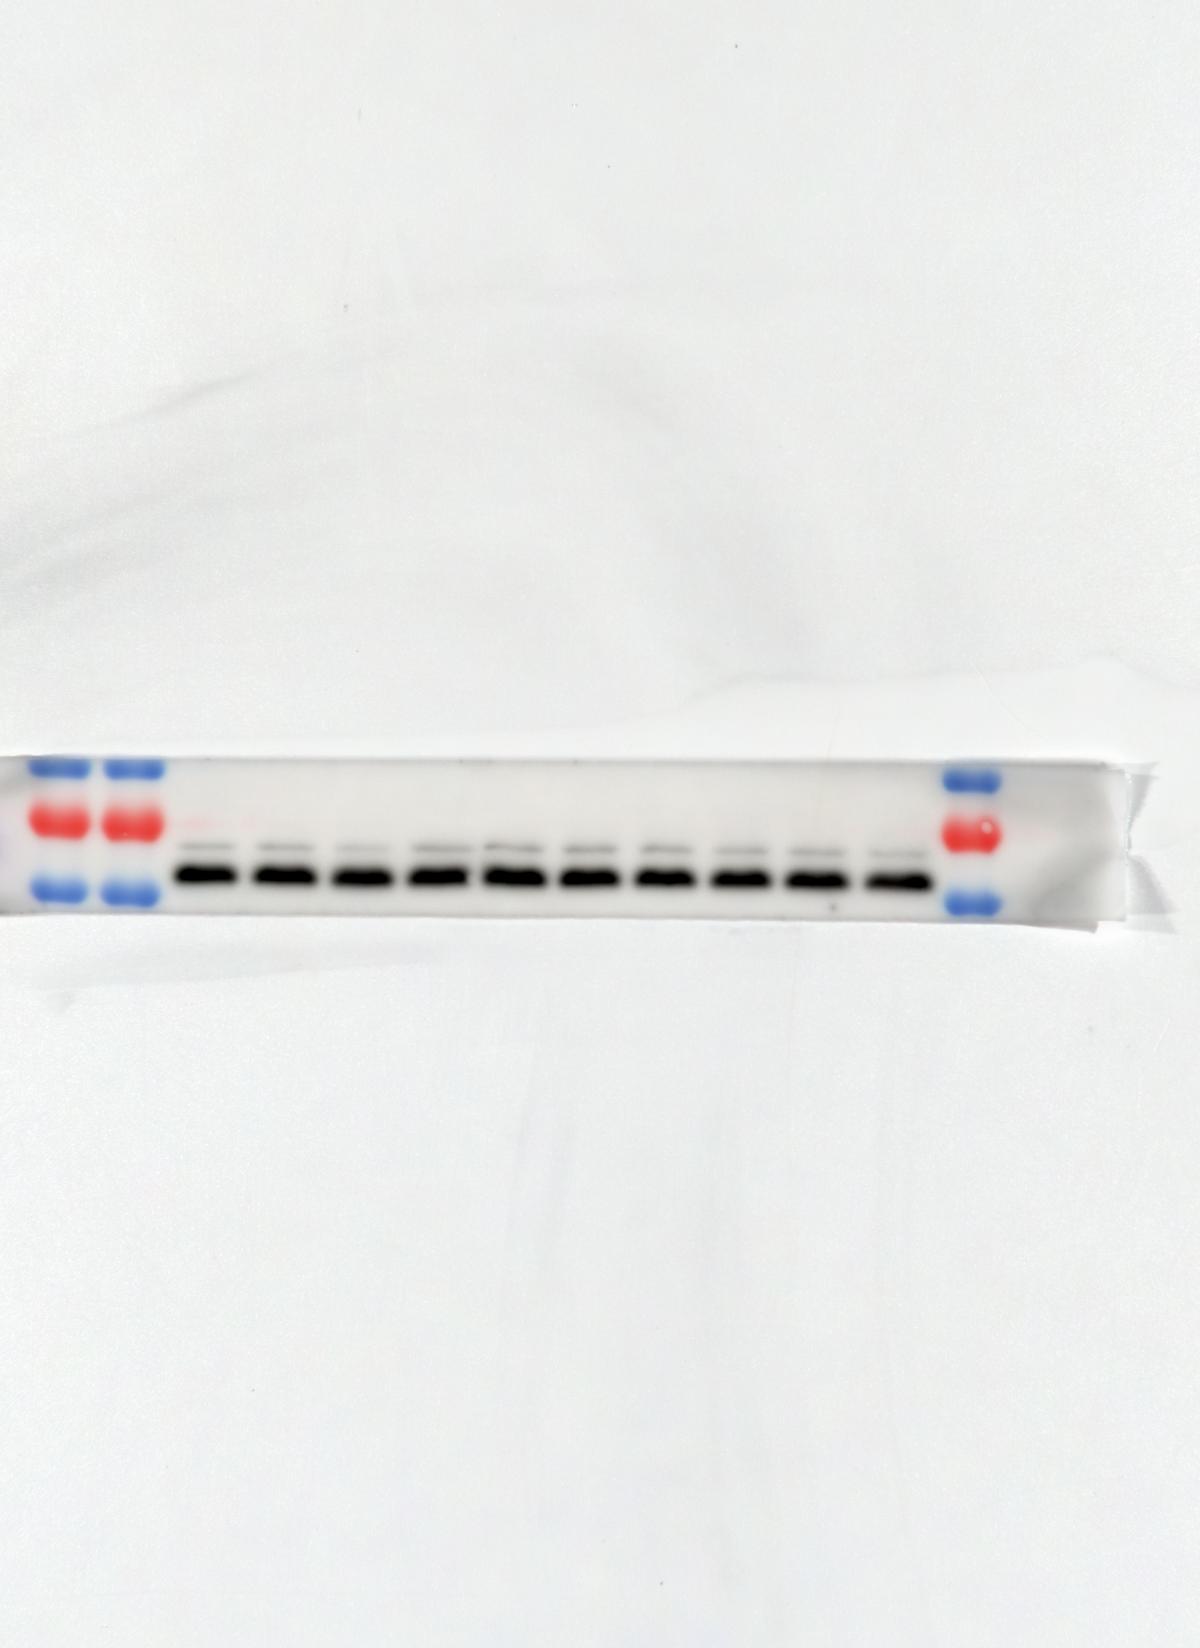


AMPK 62KDa


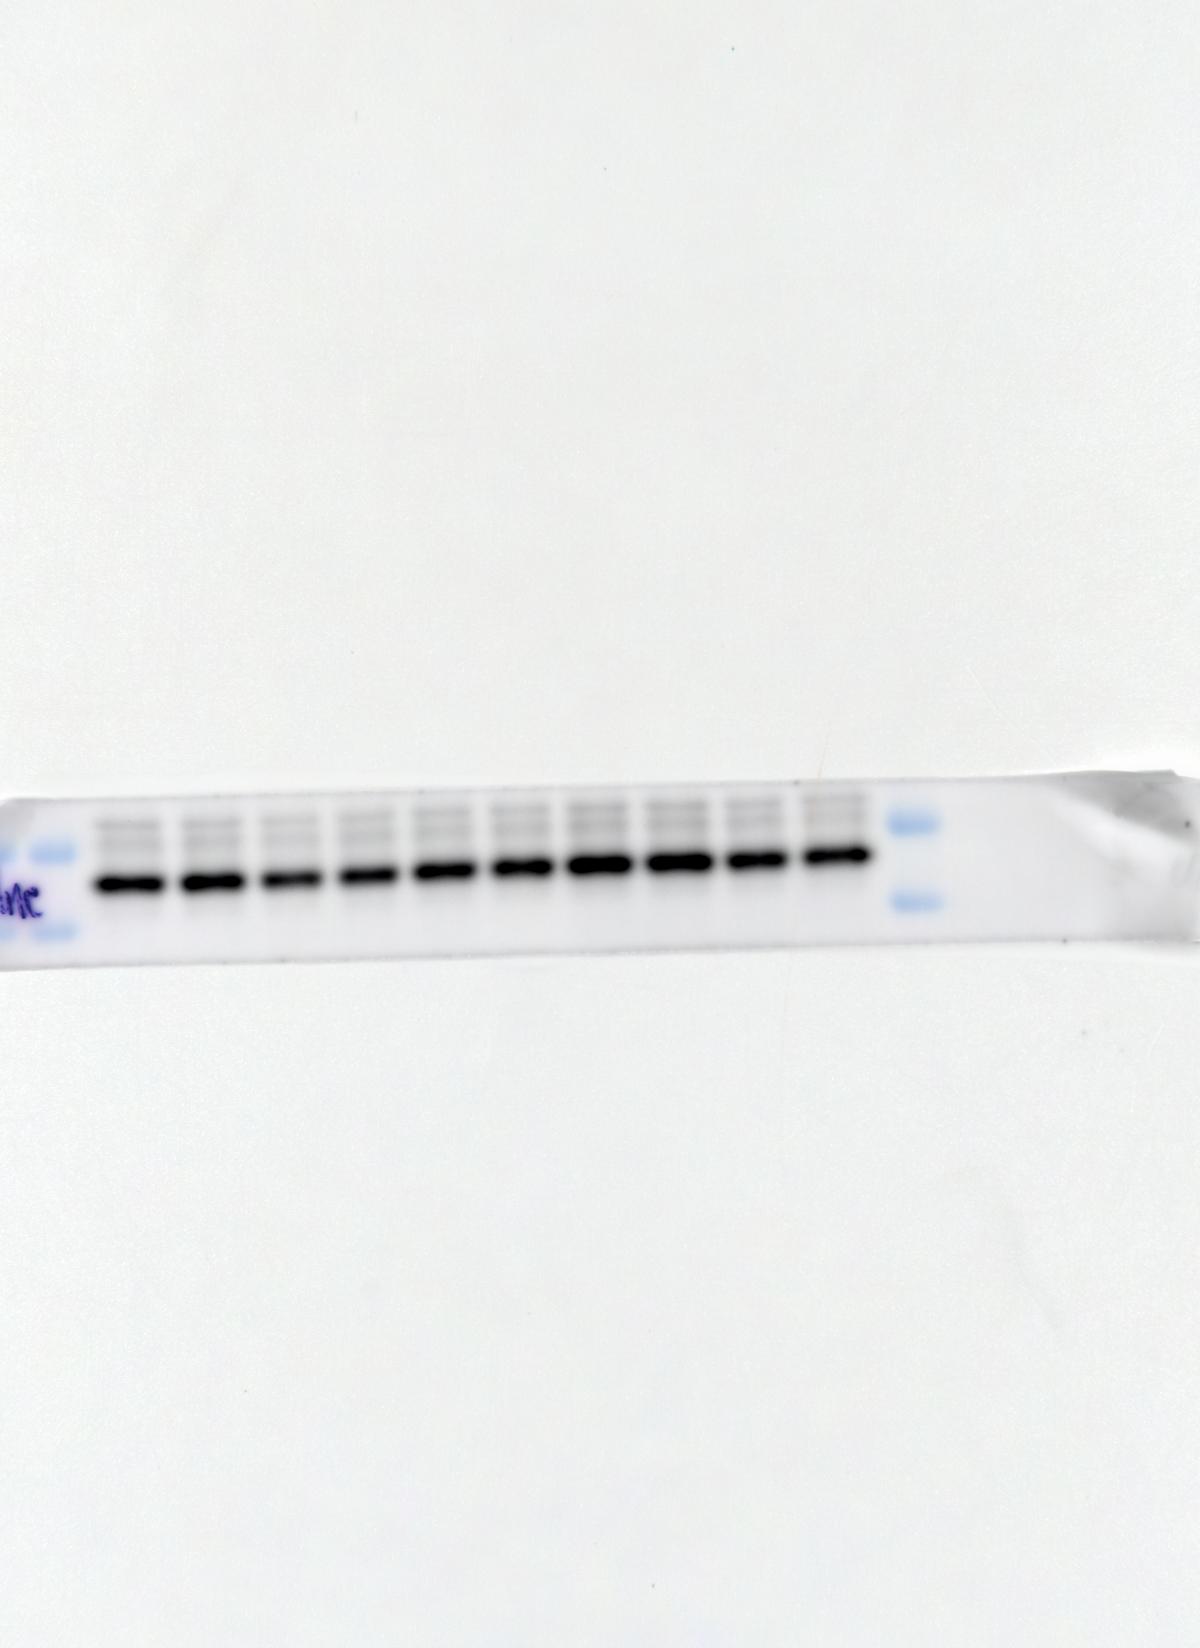


APN 26KDa


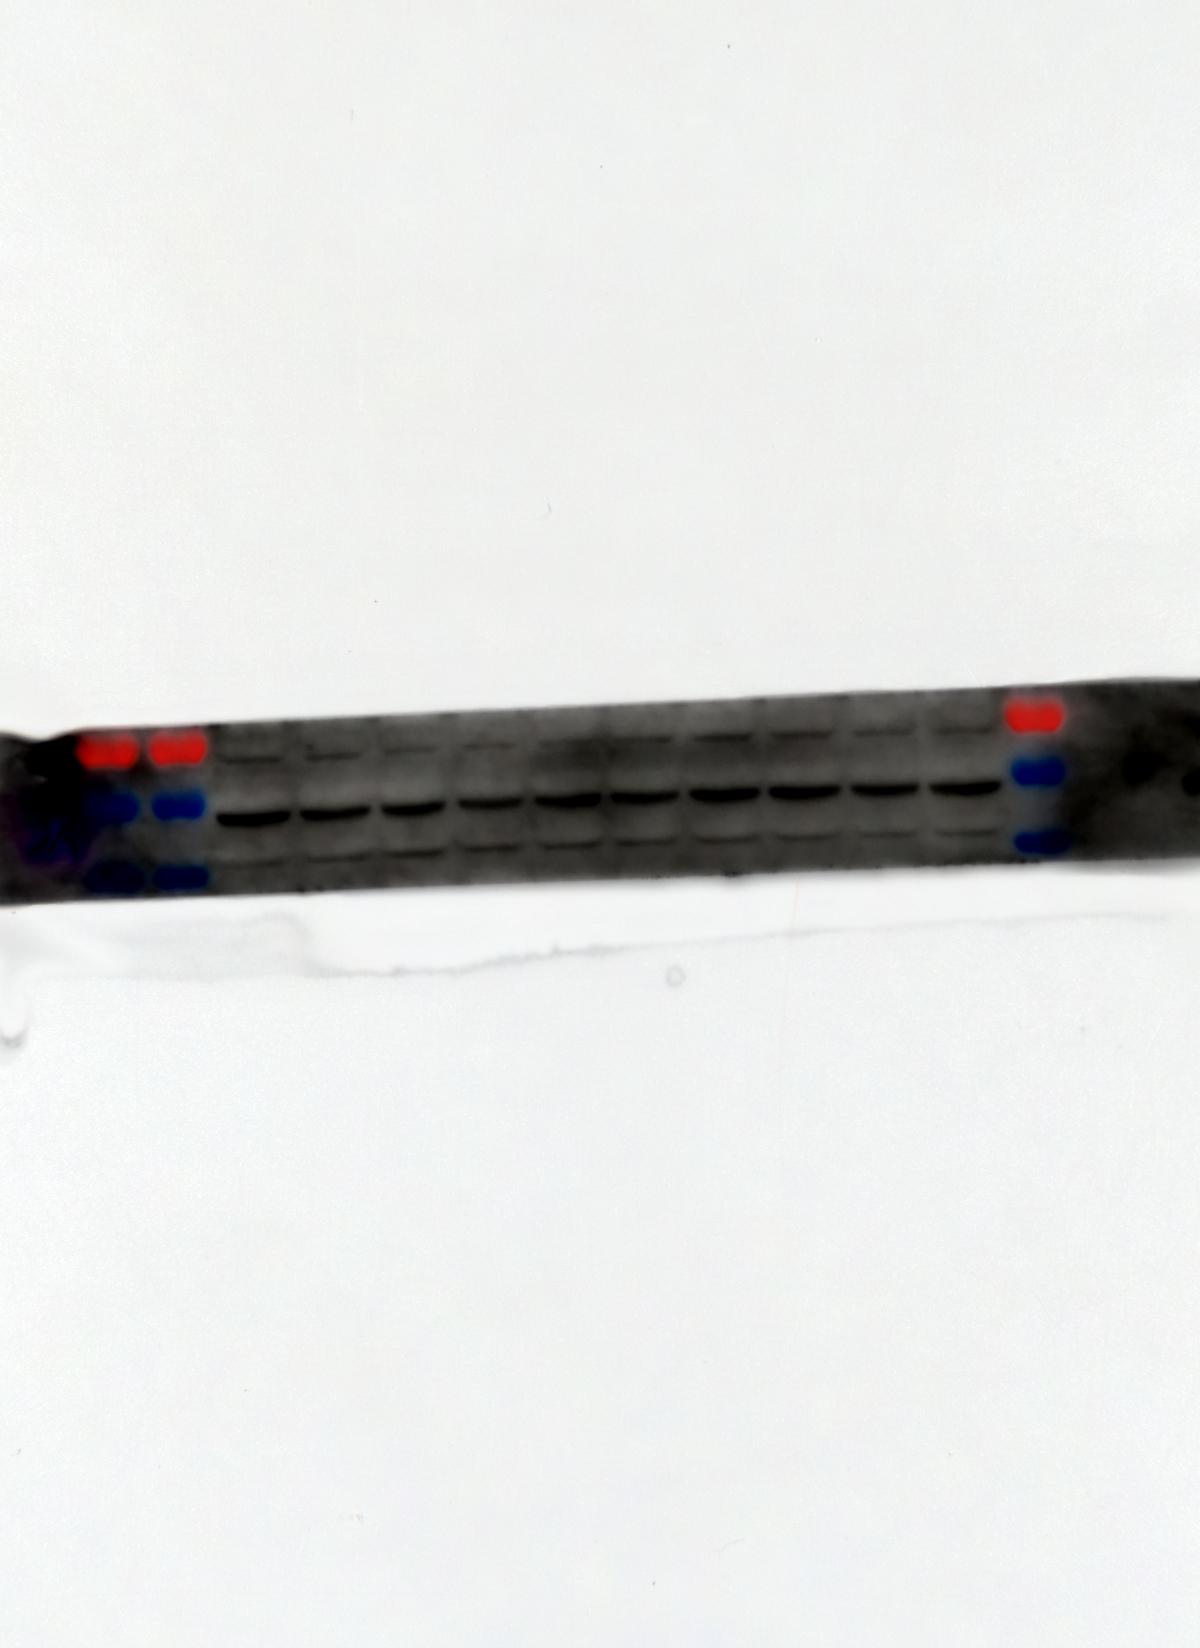


AdipoR1 43KDa


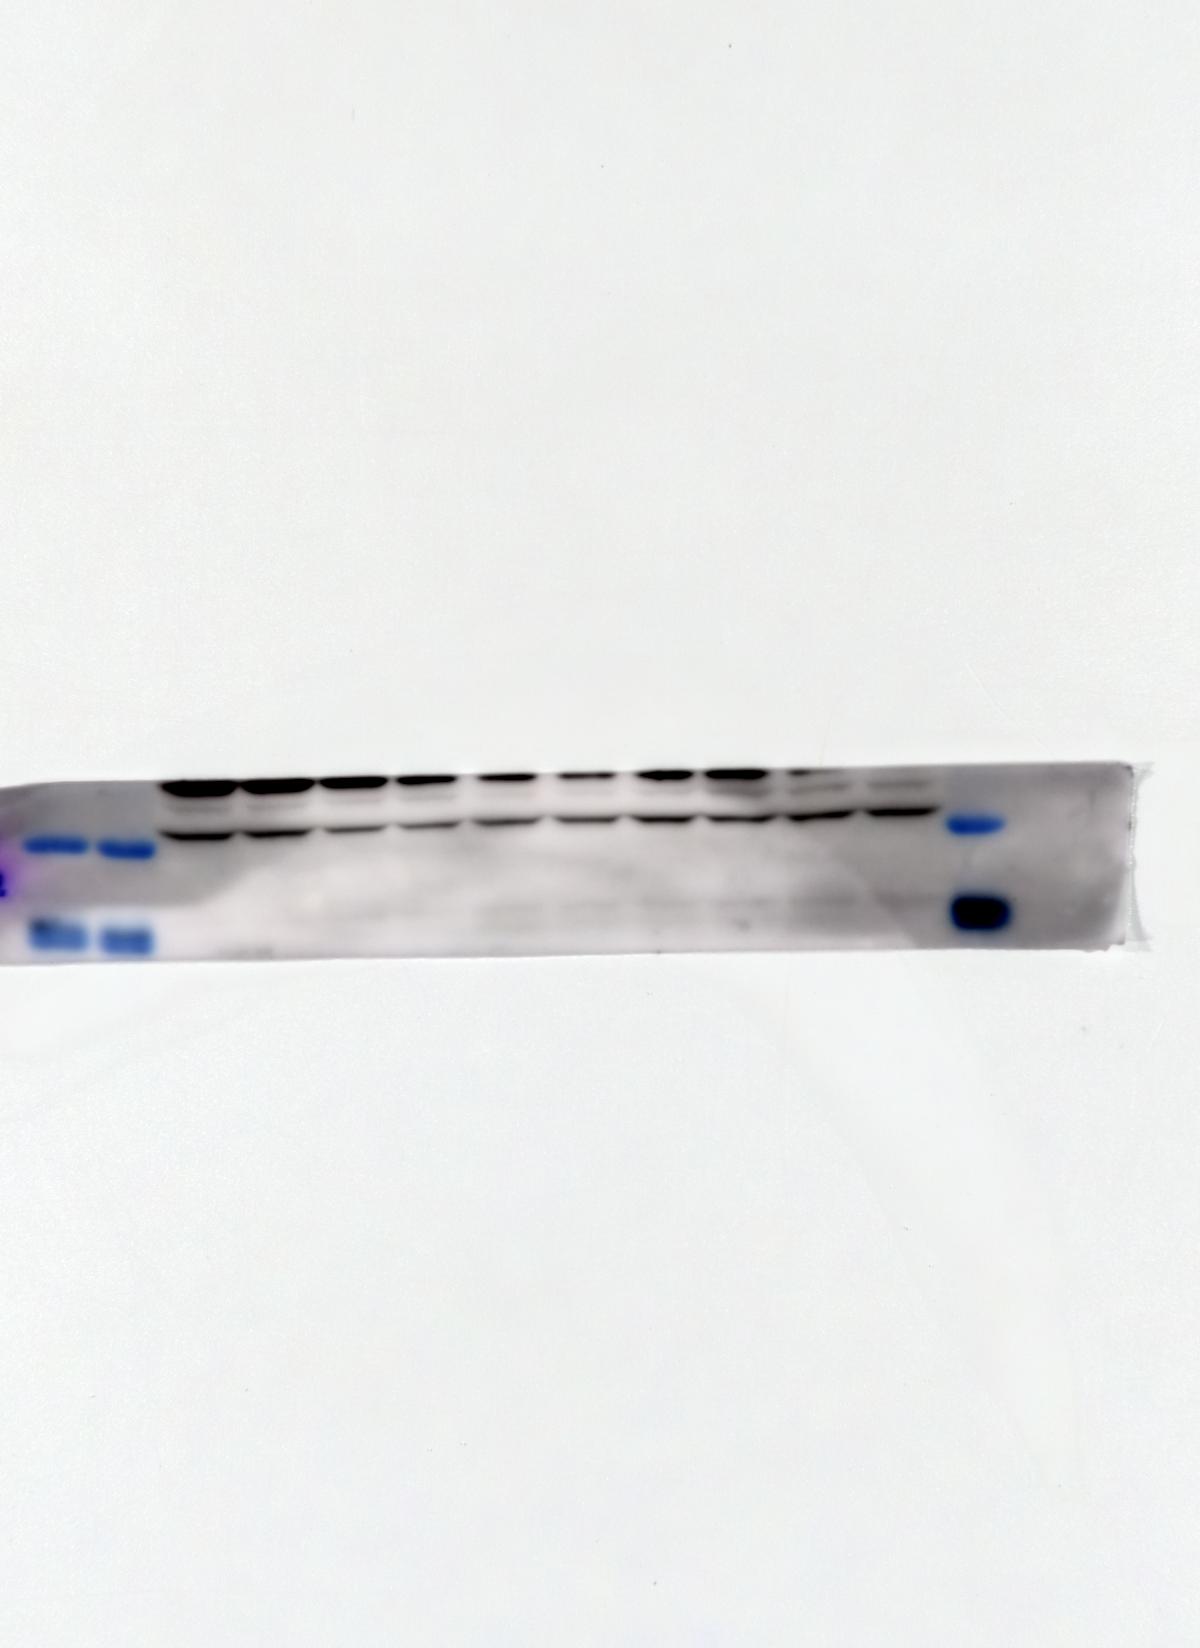


AdipoR2 43KDa


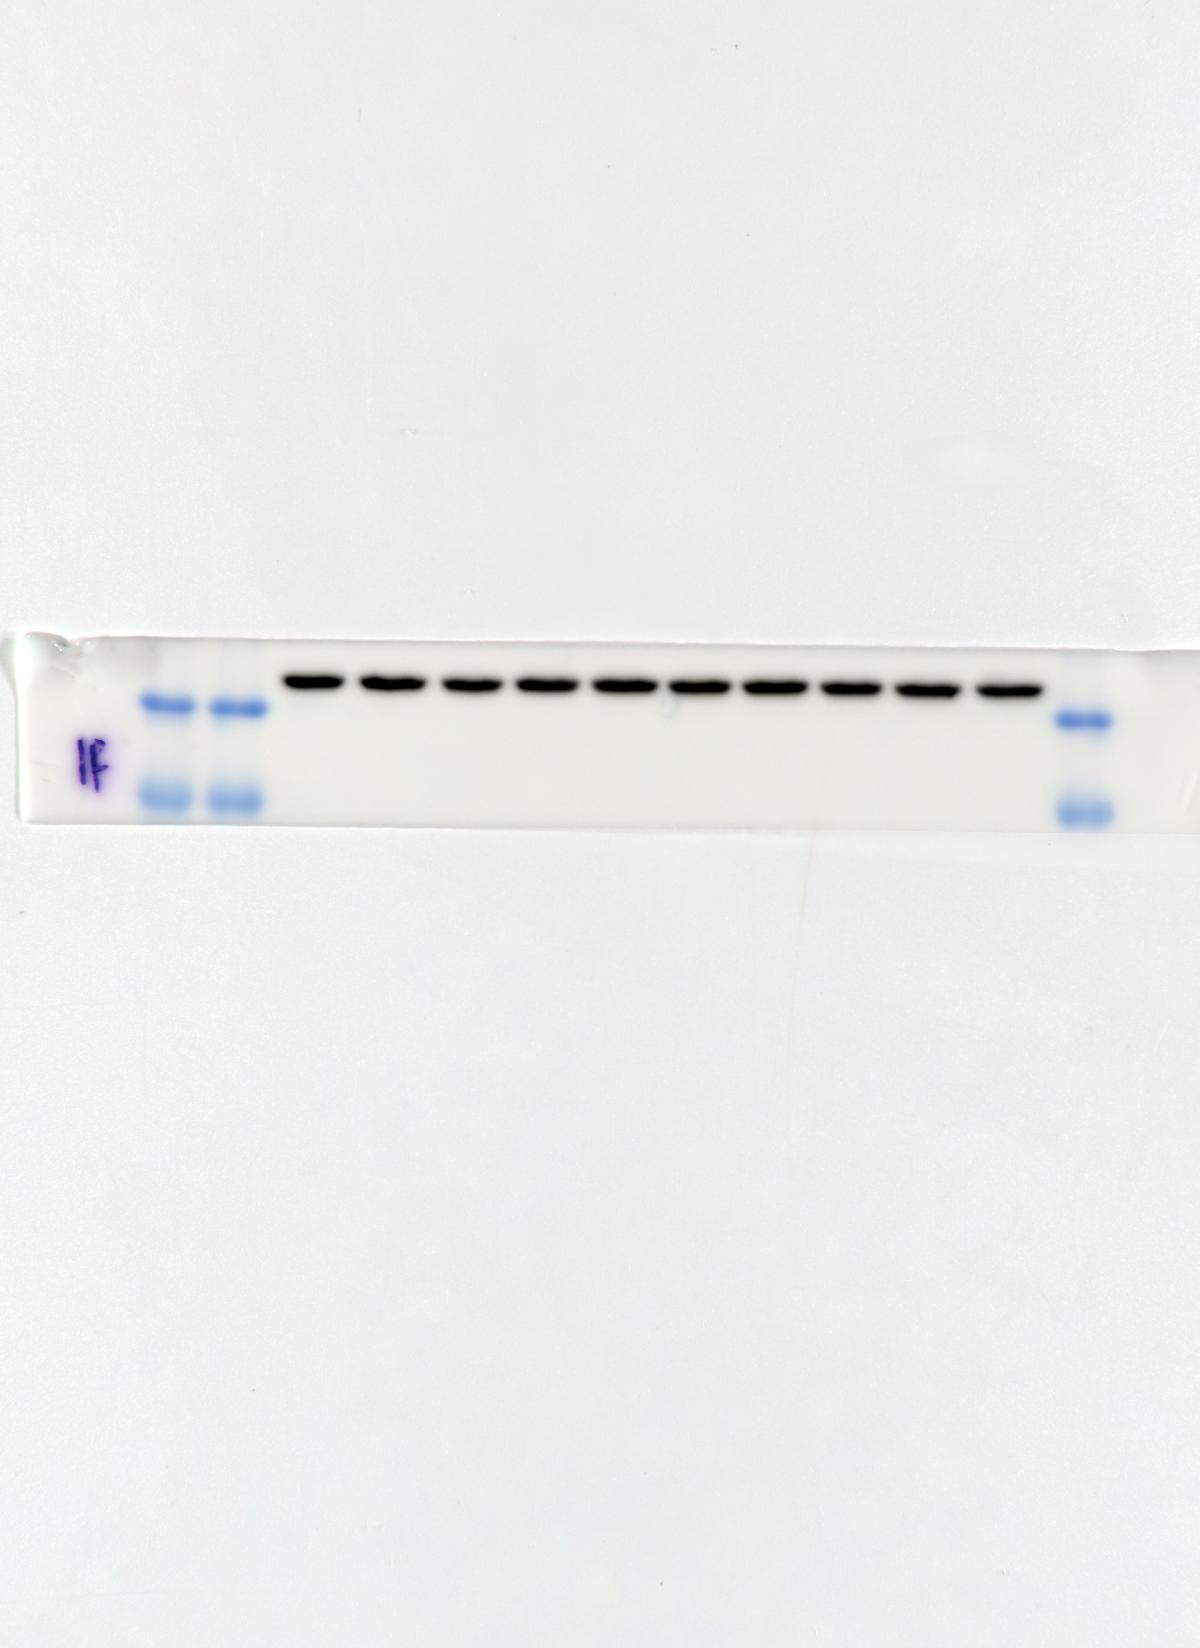


β-actin 42KDa


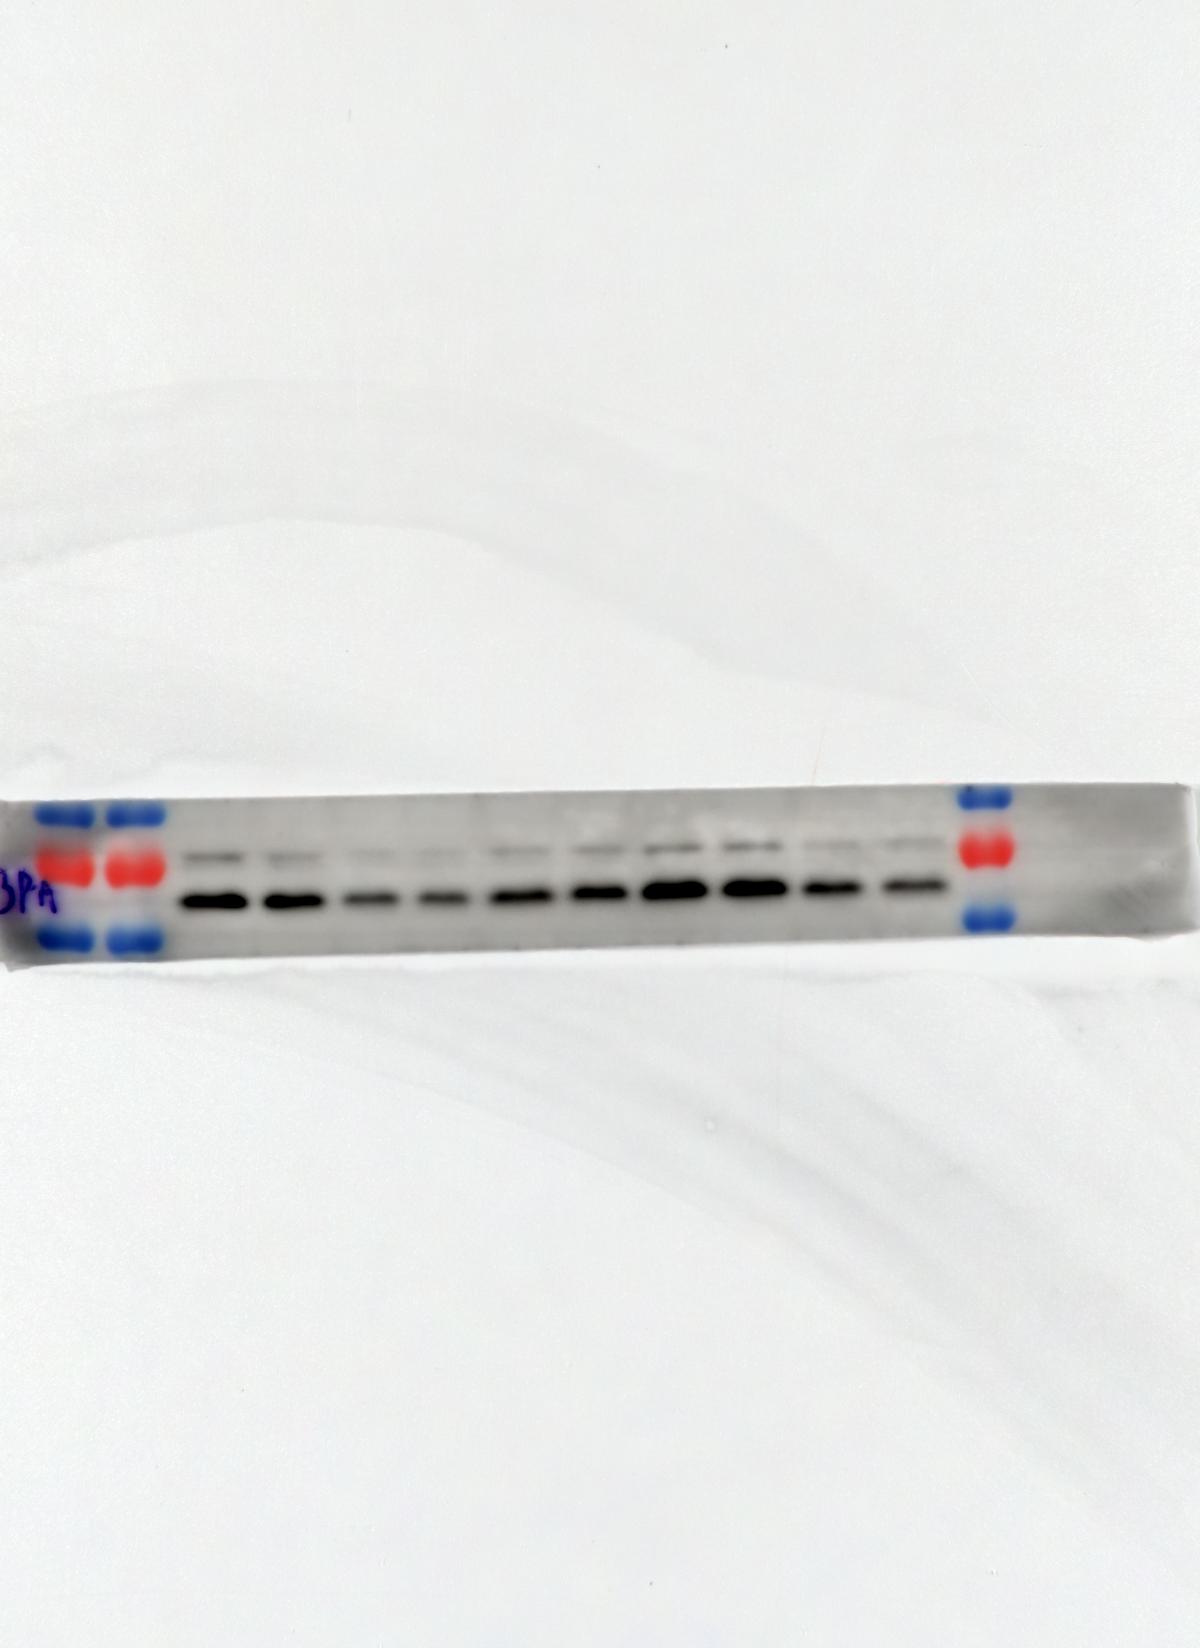


p-AMPK 62KDa


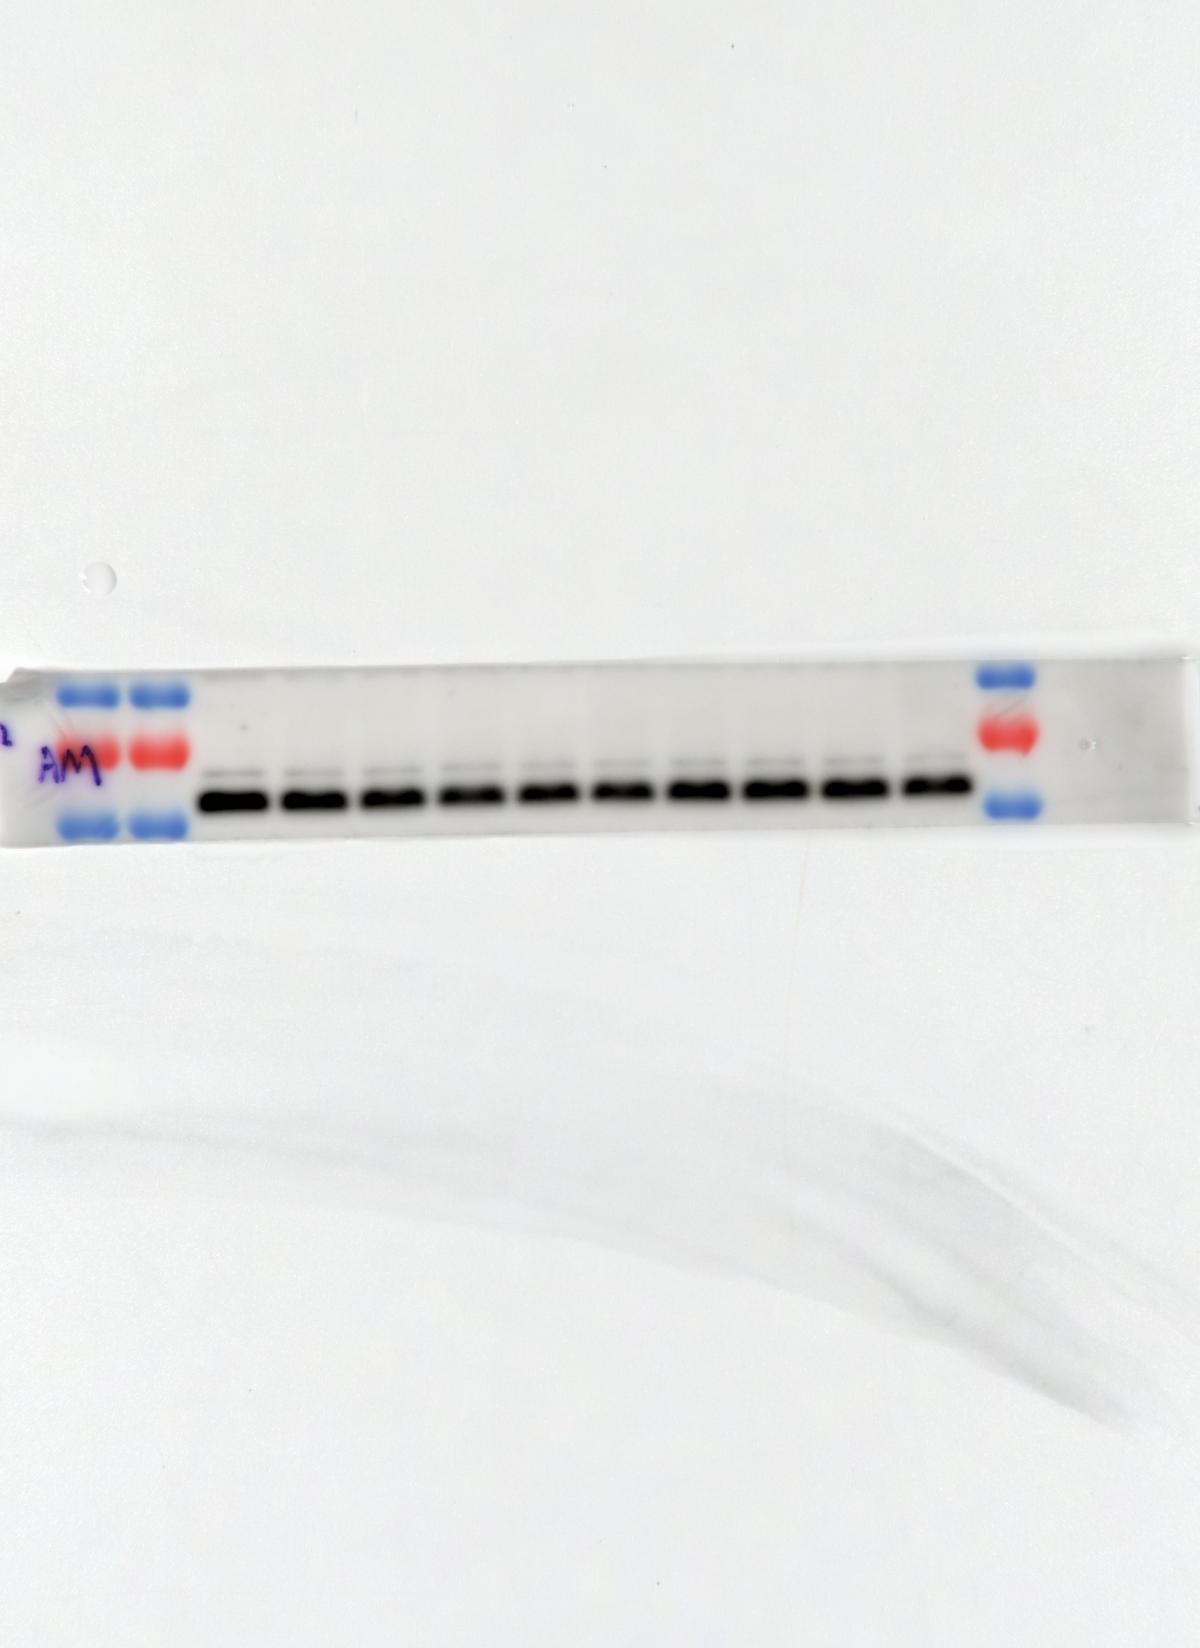


AMPK 62KDa


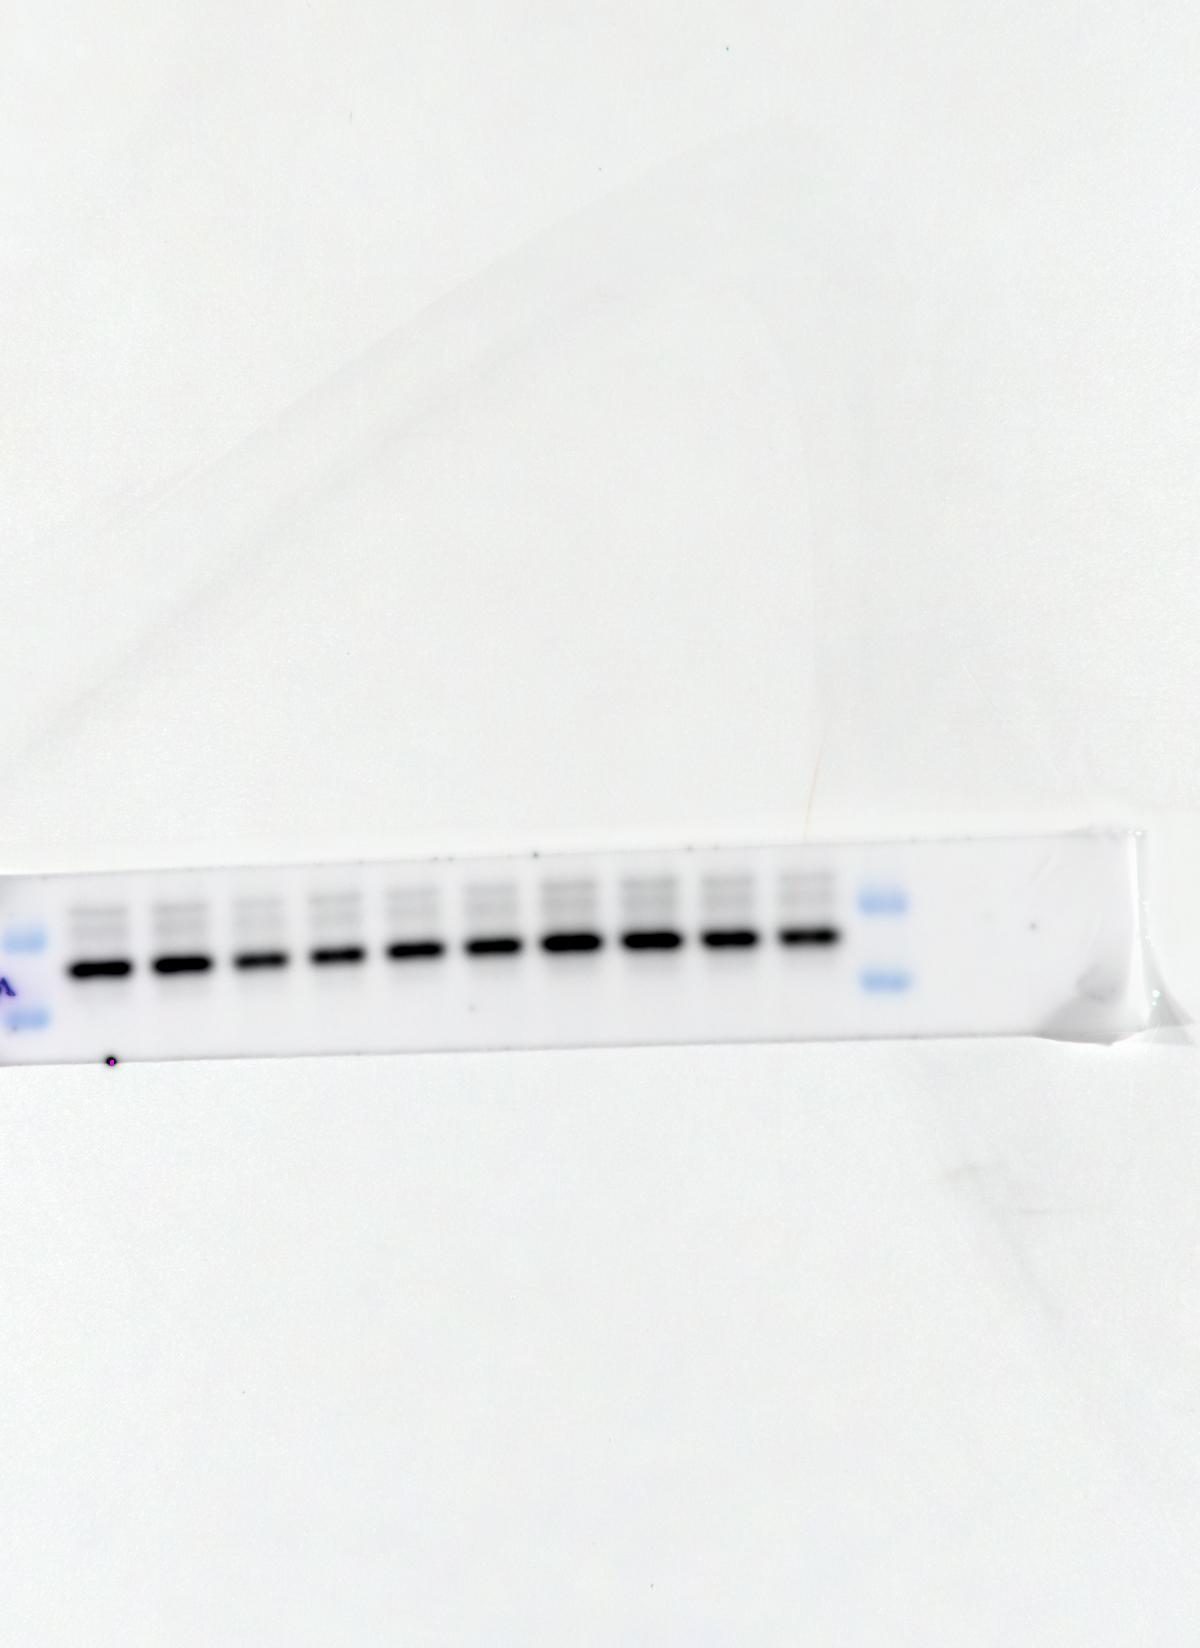


APN 26KDa


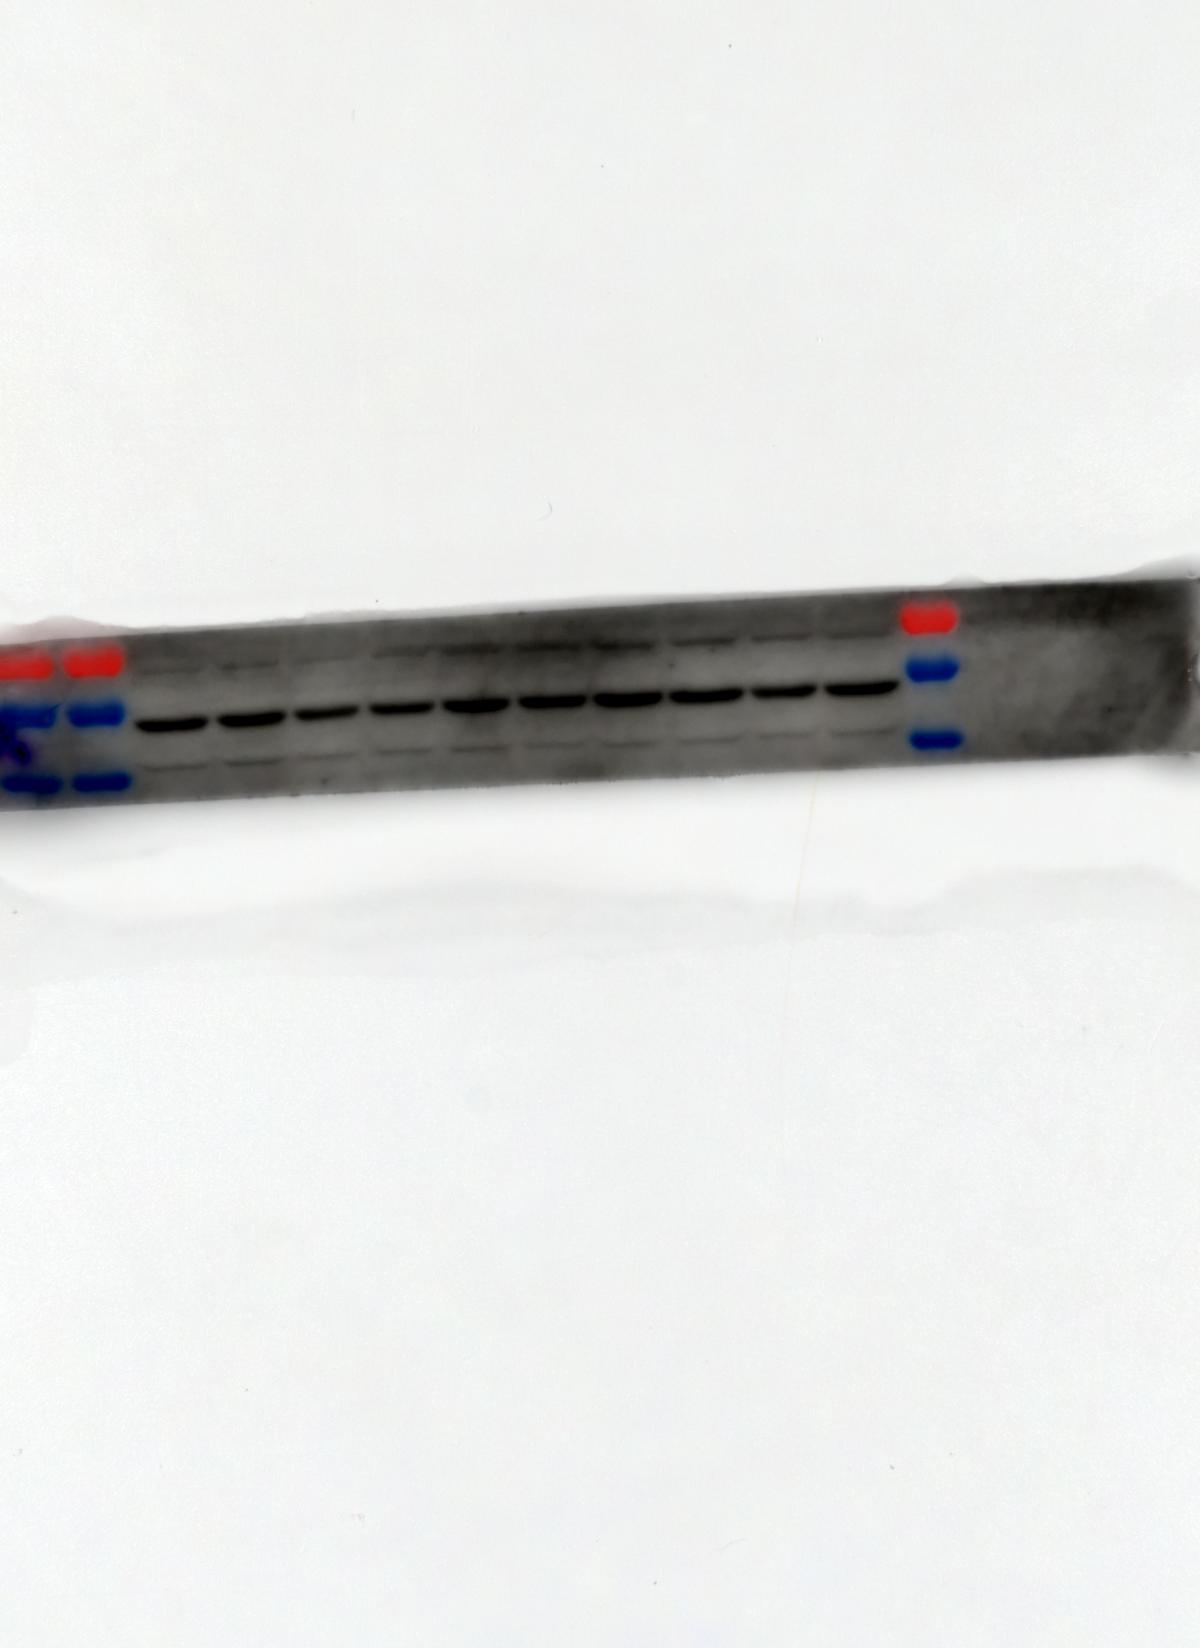


AdipoR1 43KDa


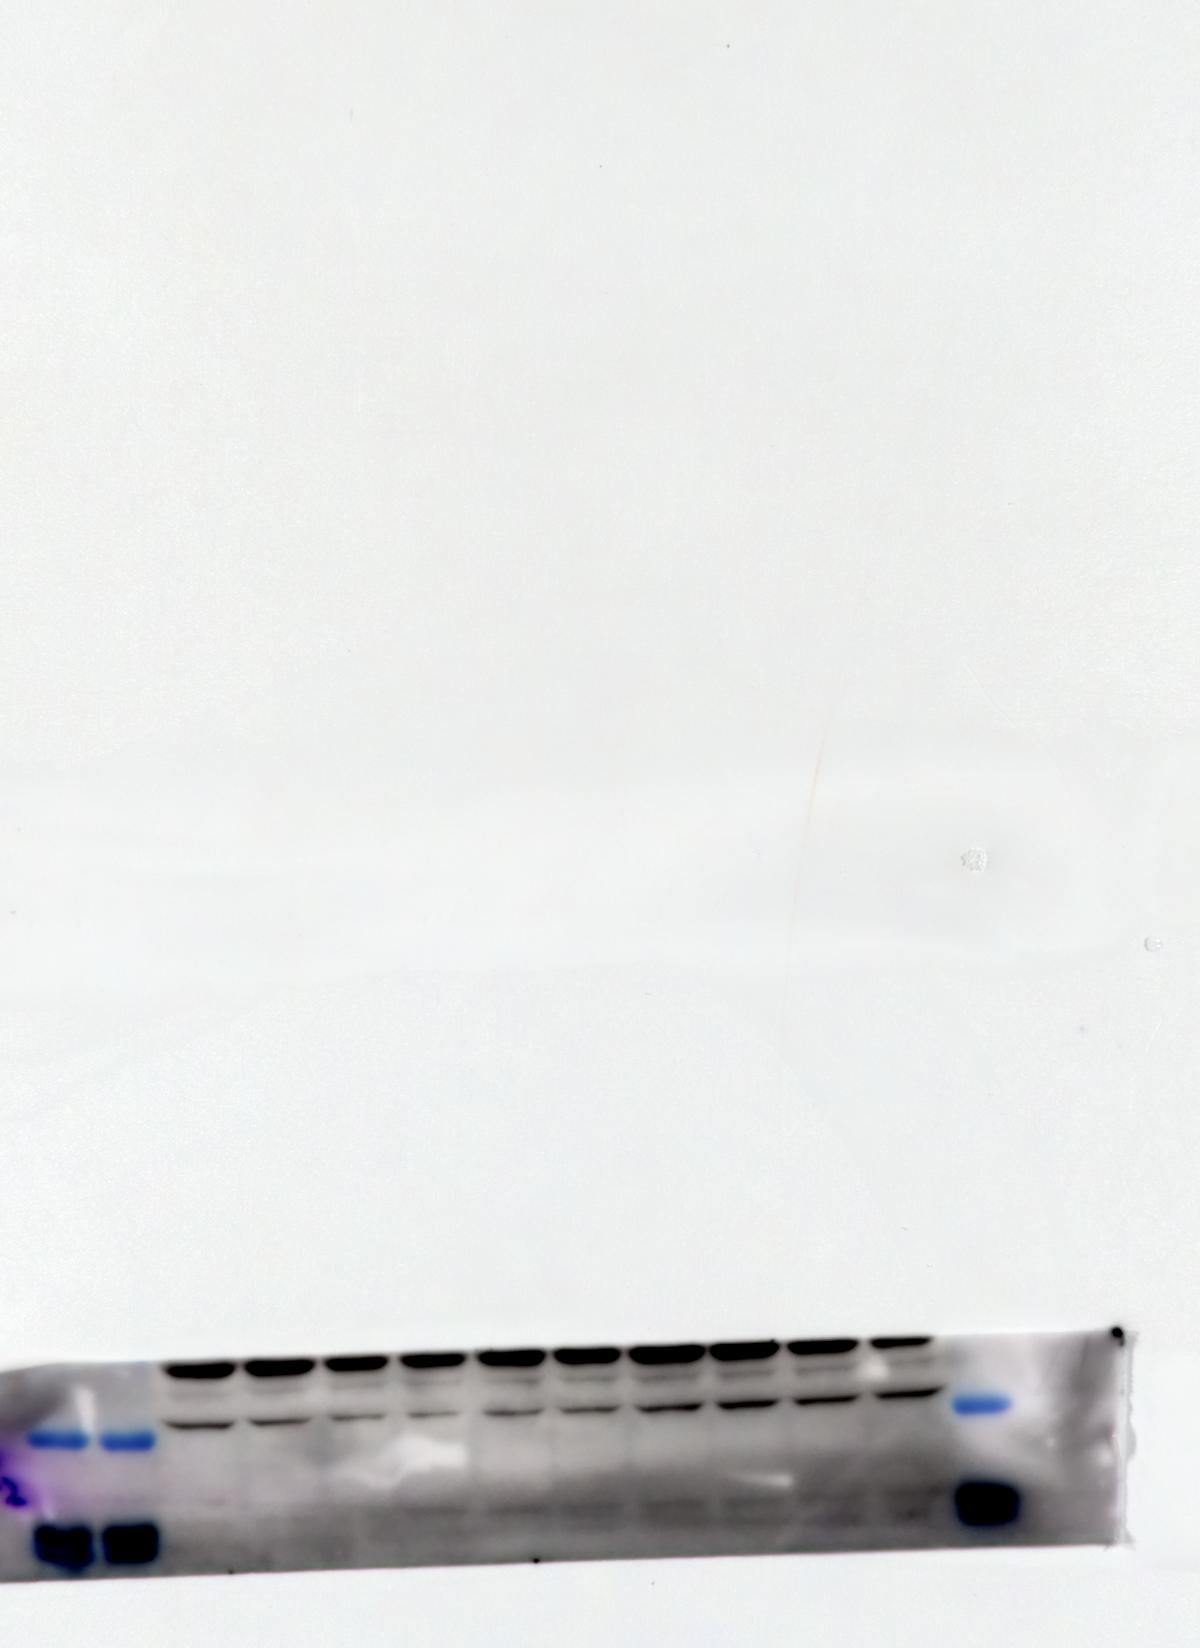


AdipoR2 43KDa


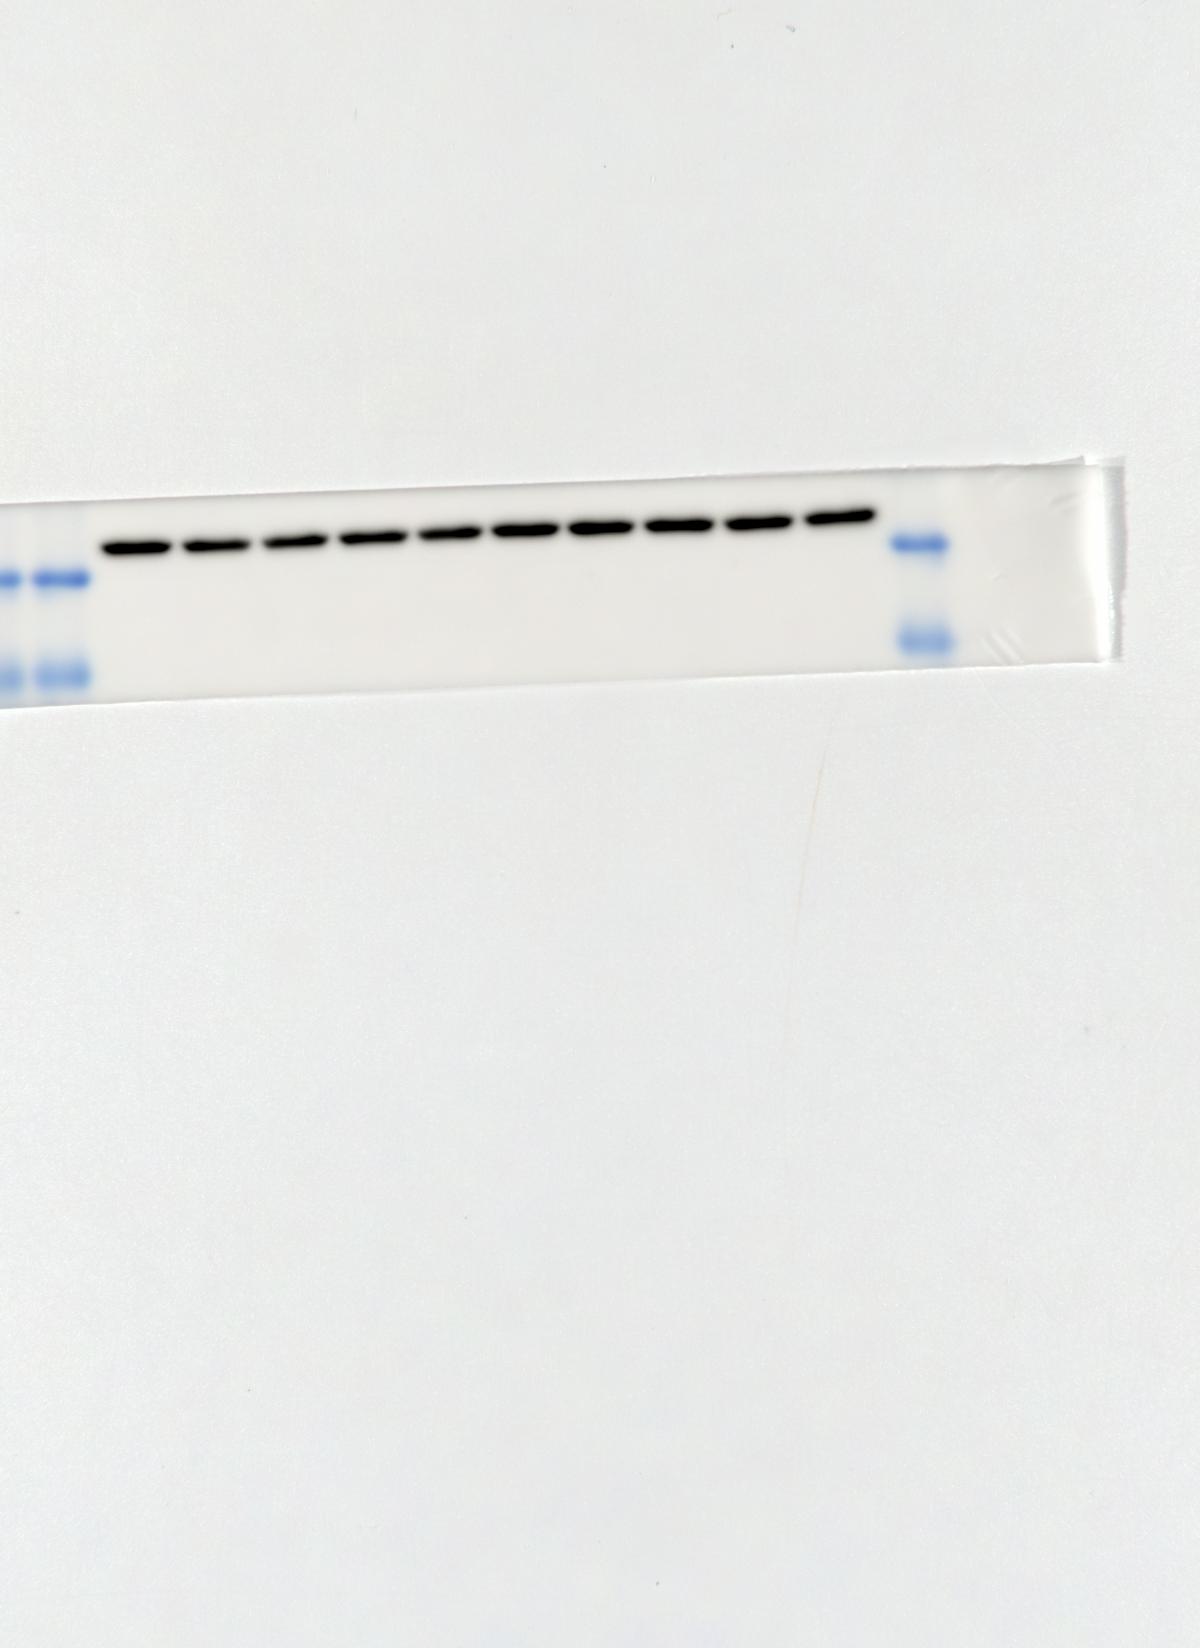


β-actin 42KDa

**Fig.6** Silencing of AdipoR1 abrogates autophagy promotion by ARC-18**.** (A) Original strip of western blot for adiponectin receptor-associated proteins in 5xFAD mice. Please refer to the manuscript for specific grouping and experimental conditions (n=4).

Figure 6B


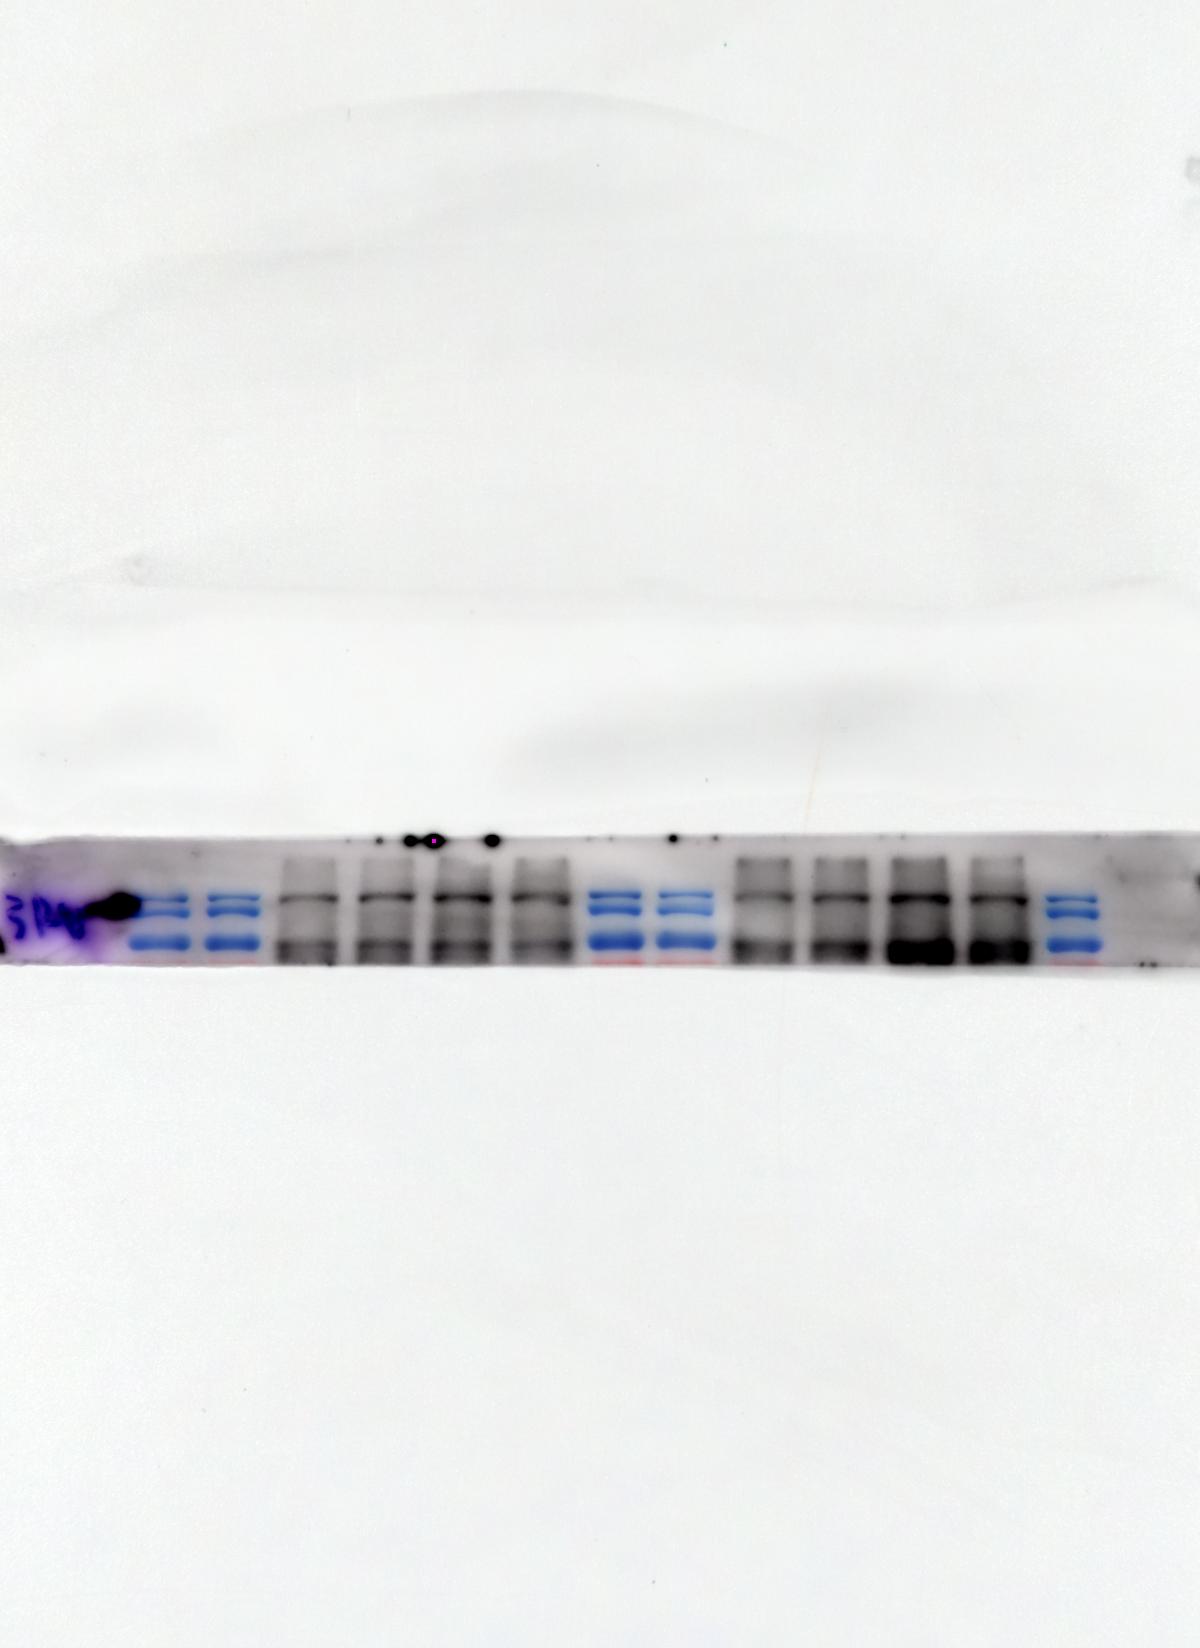


p-ULK1 140KDa


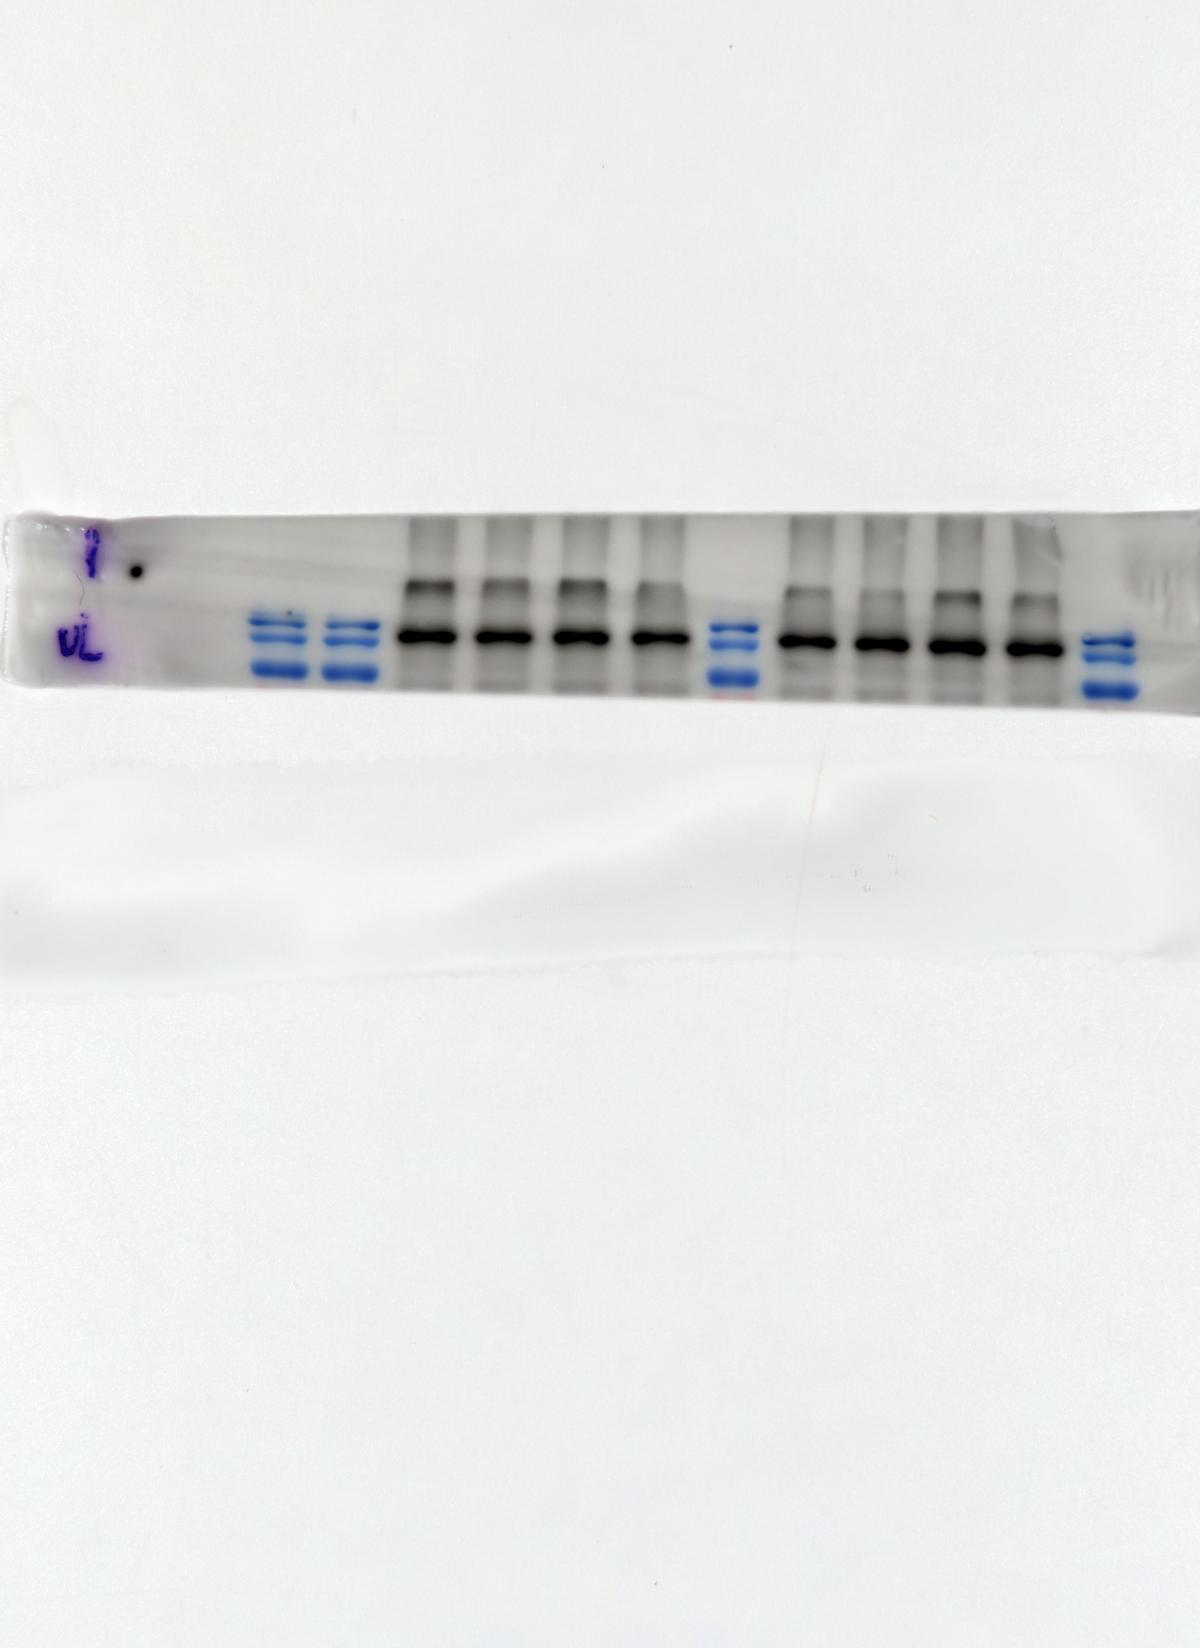


ULK1 140KDa


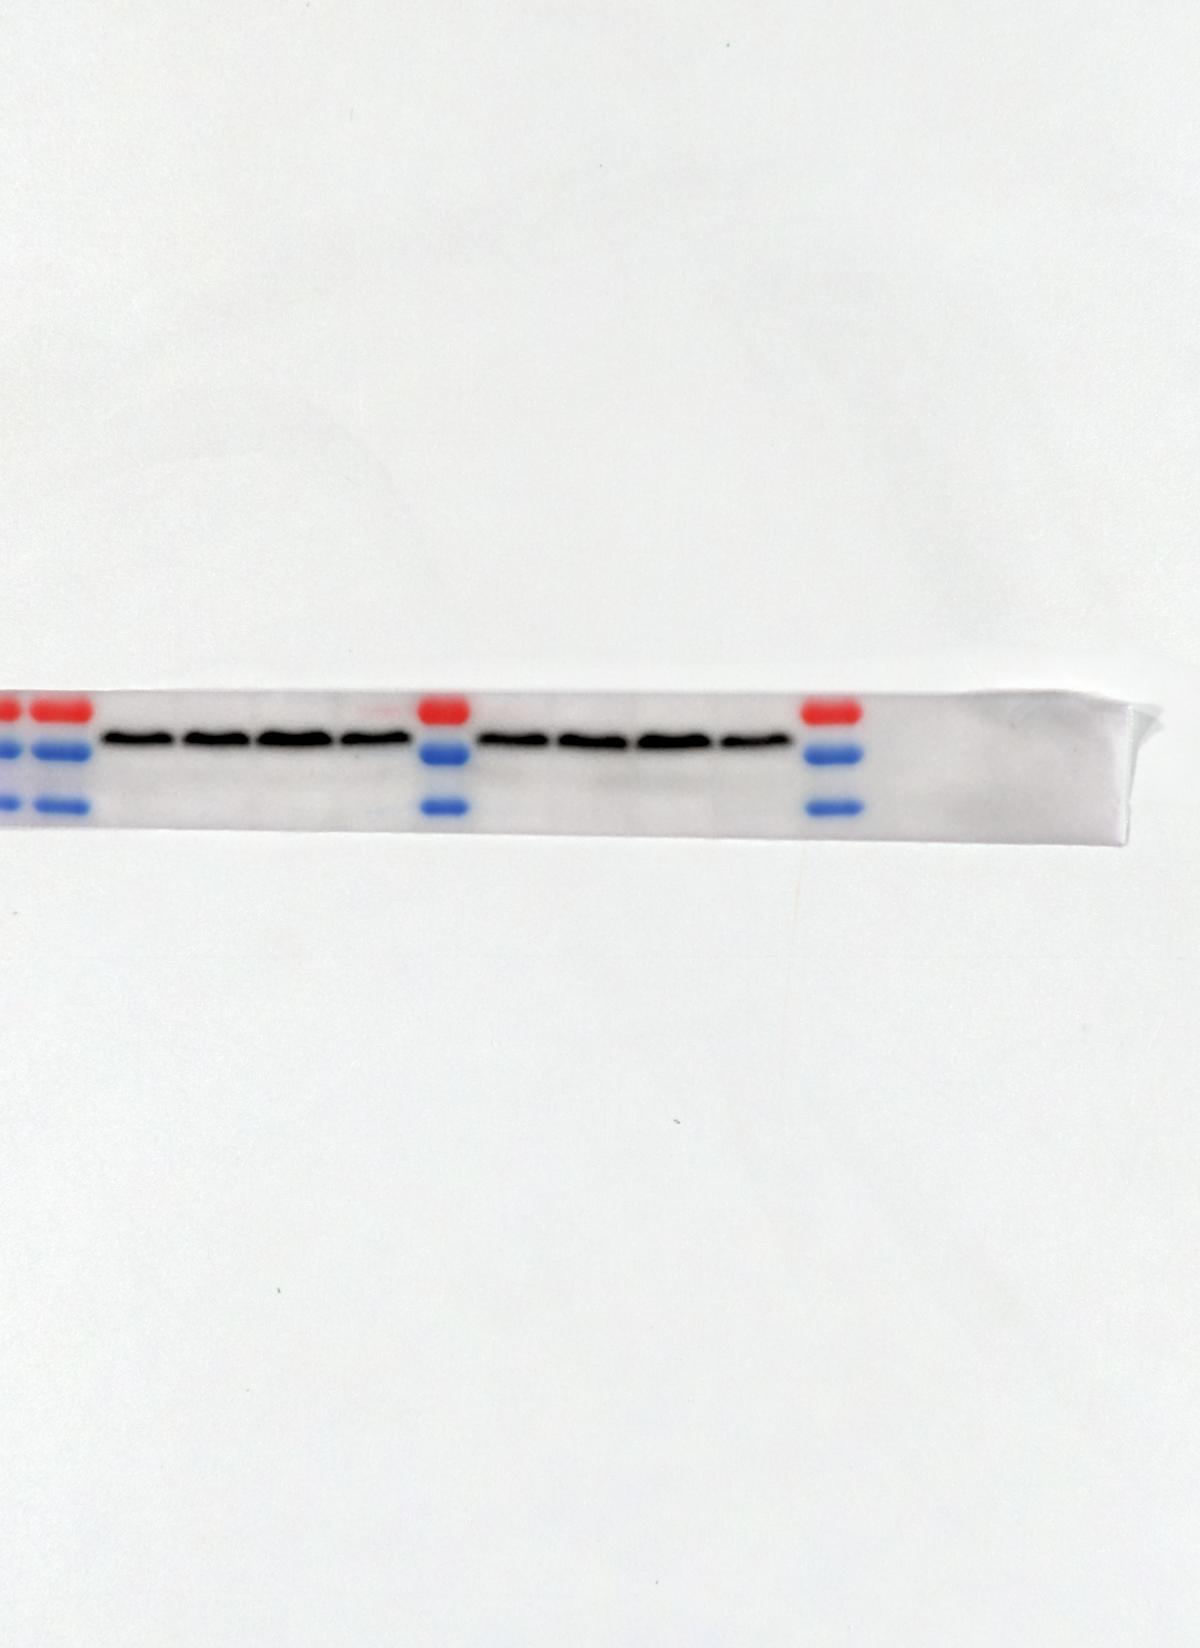


p-AMPK 62KDa


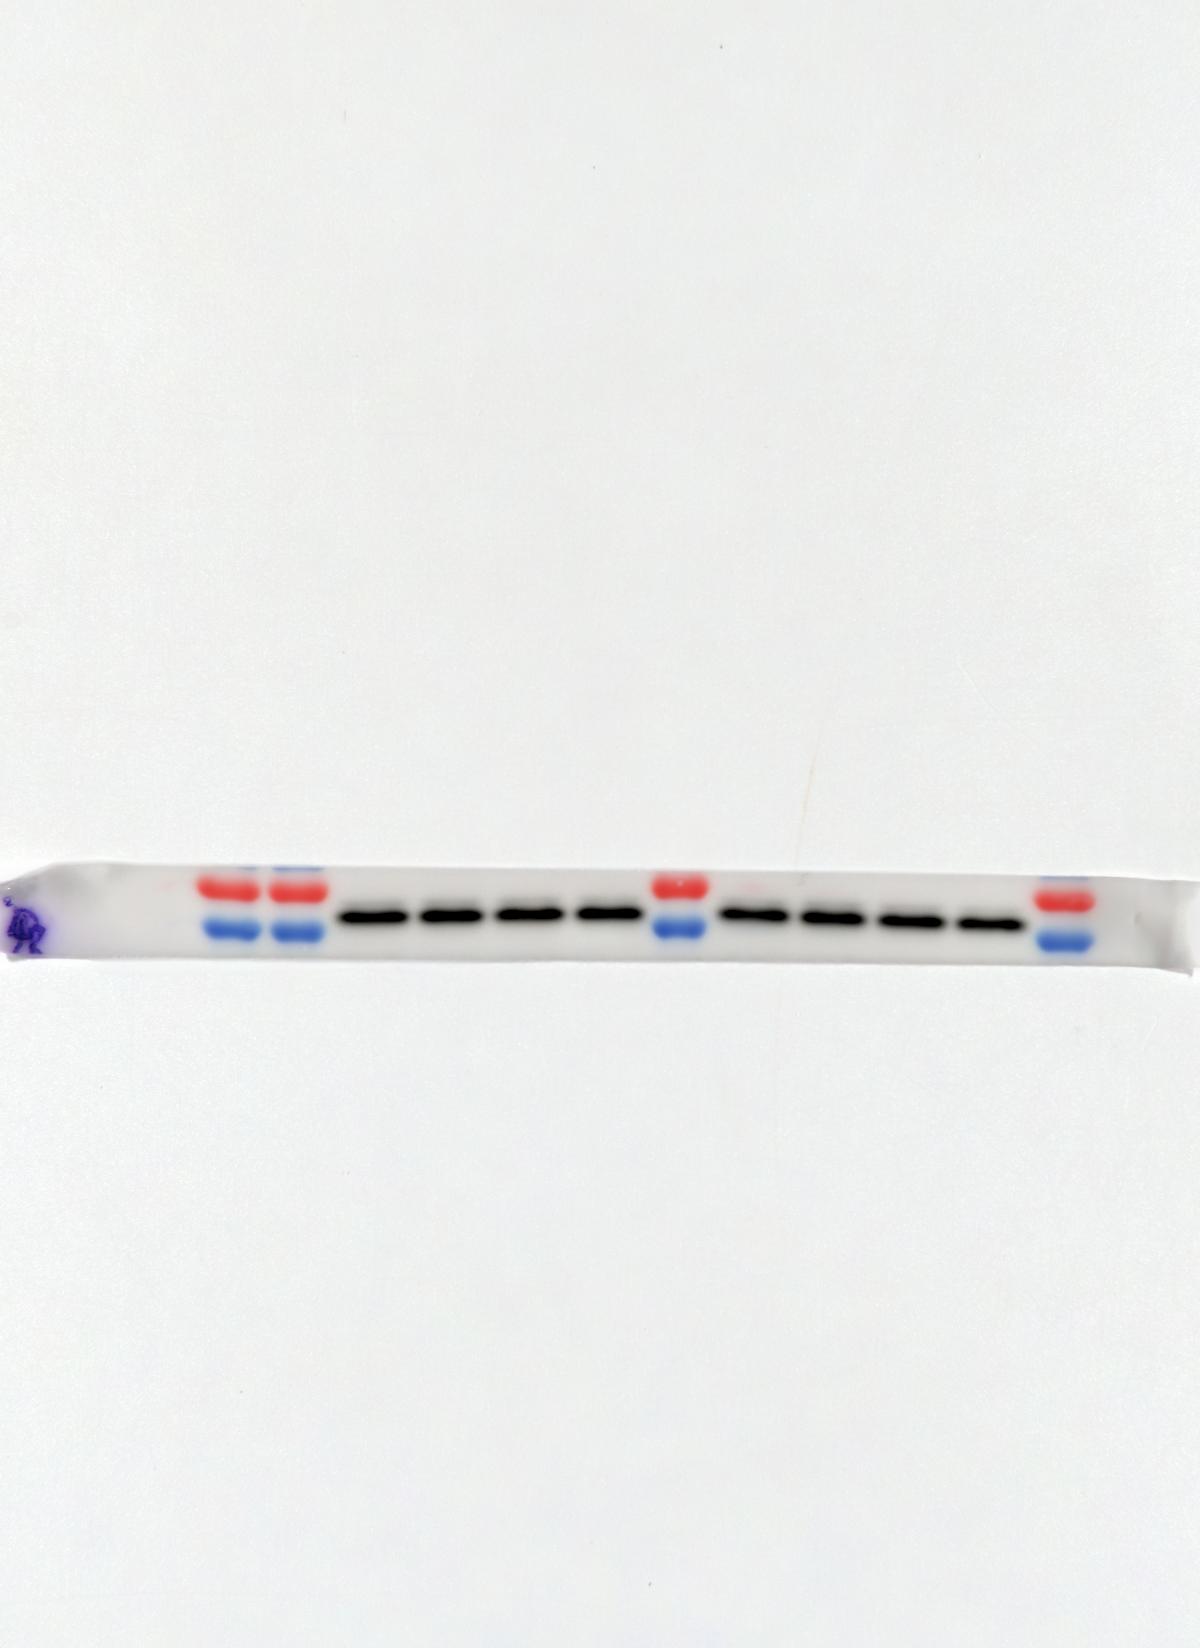


AMPK 62KDa


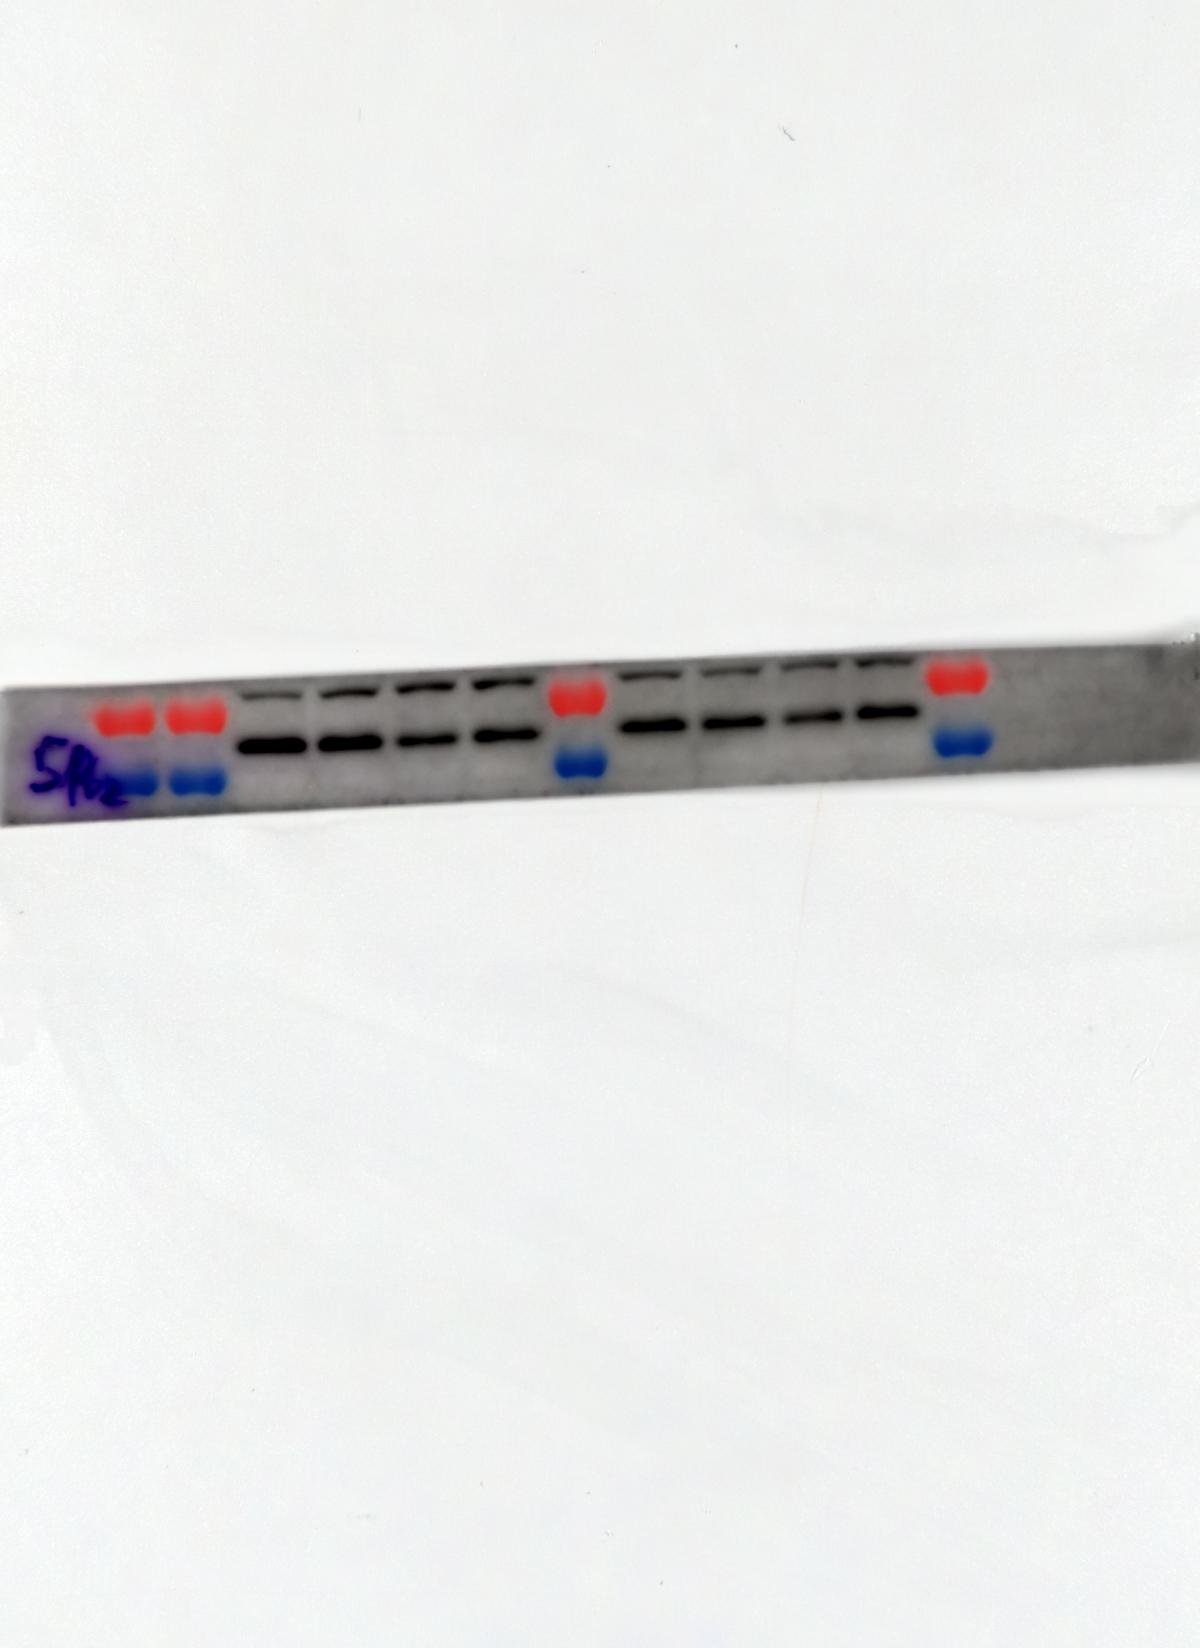


P62 62KDa


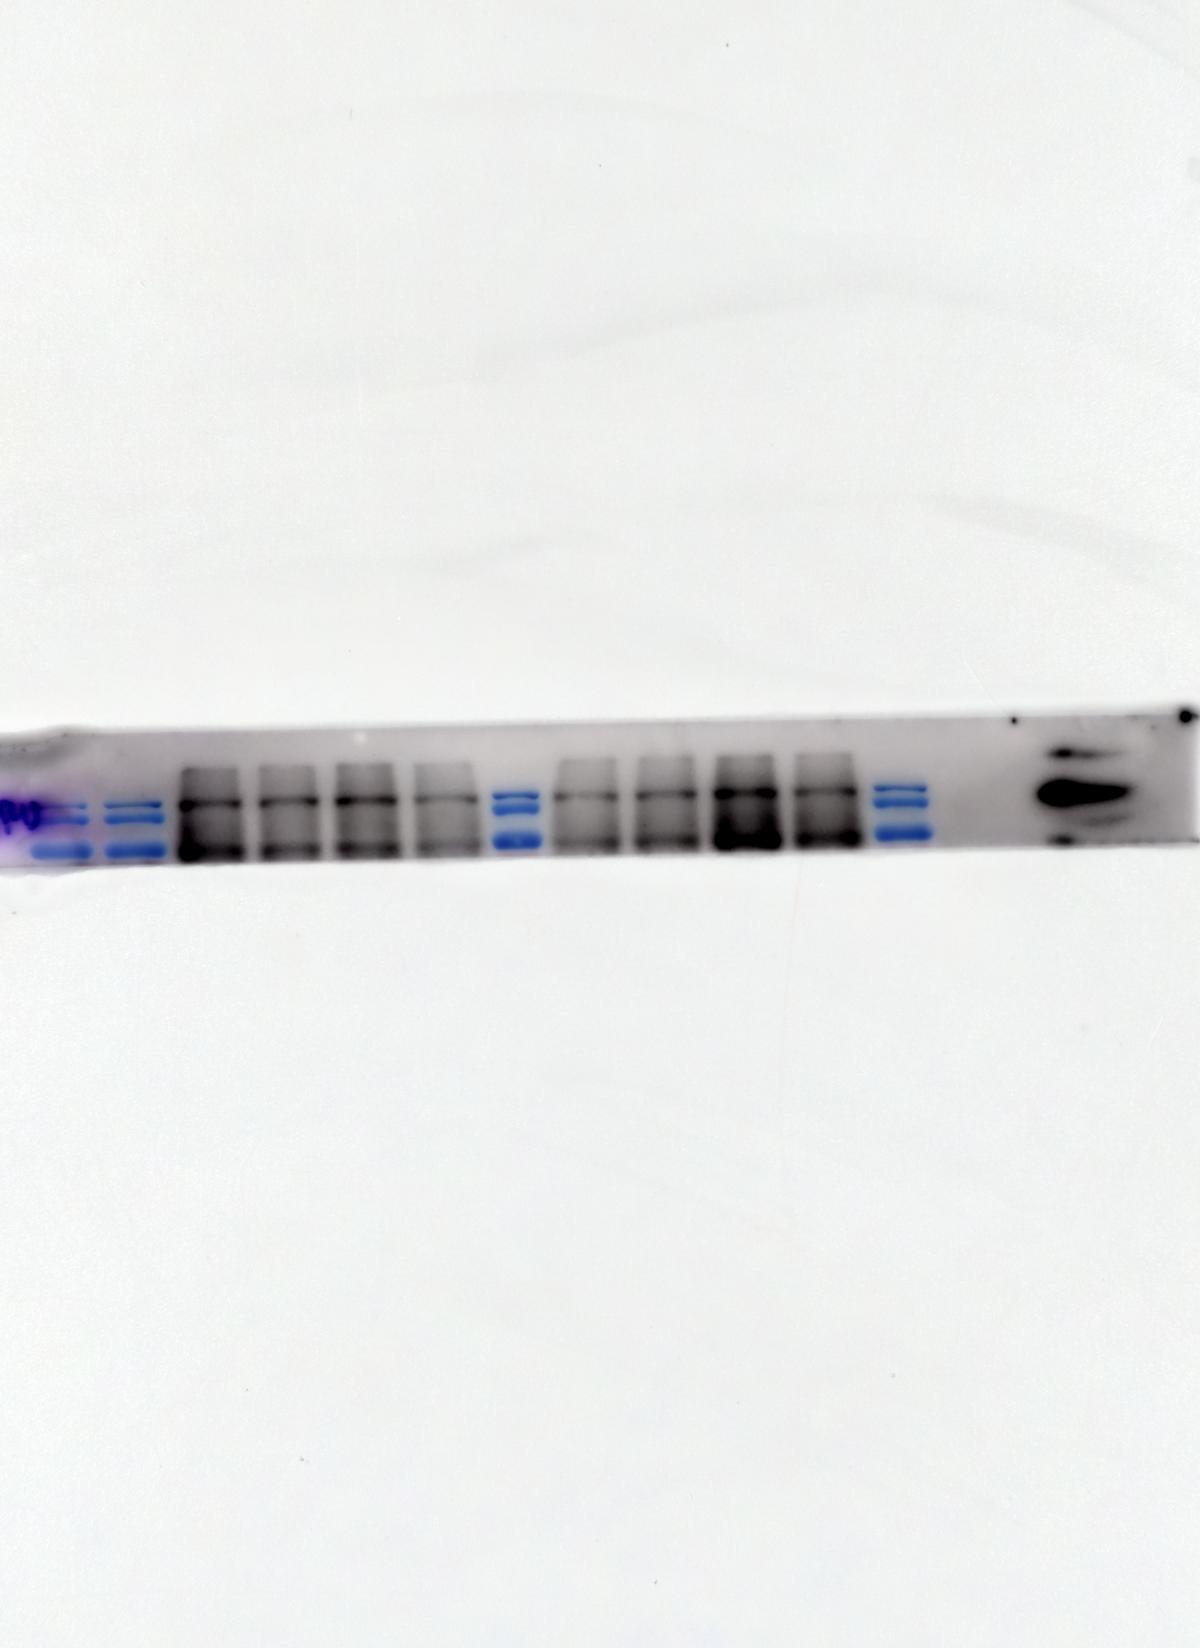


p-ULK1 140KDa


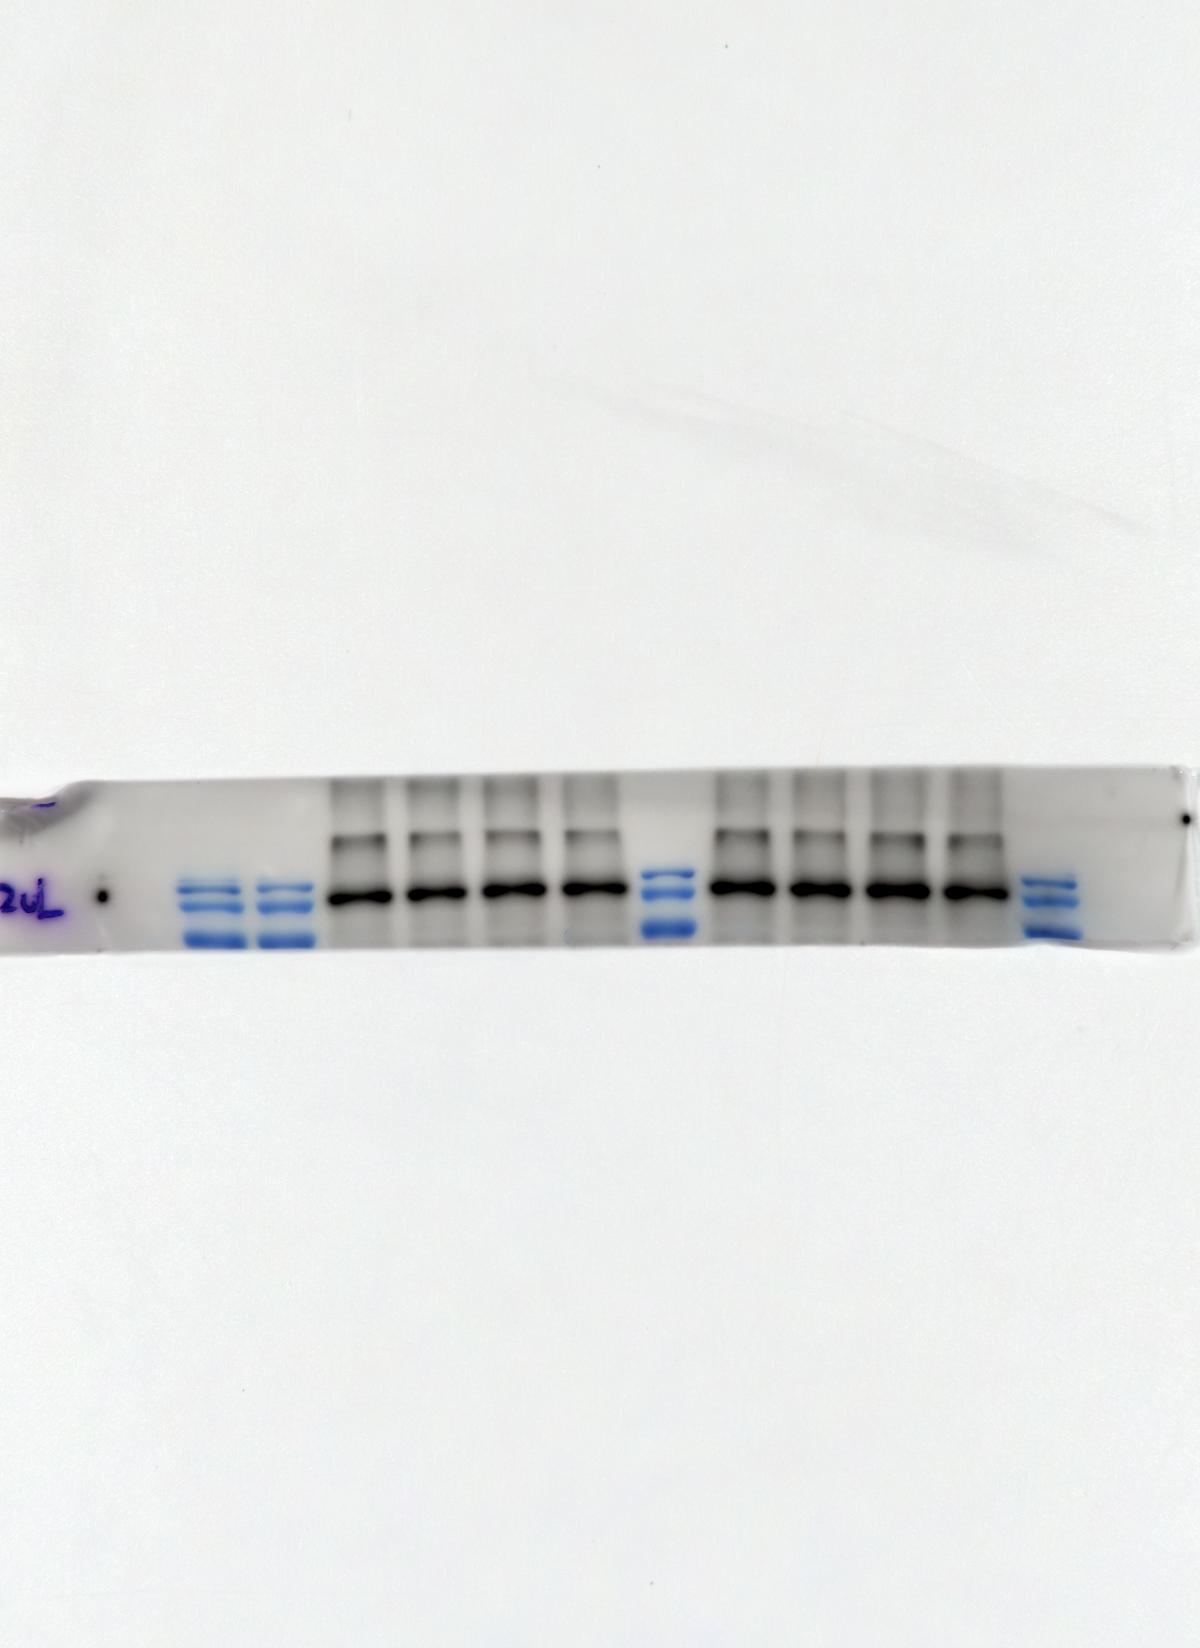


ULK1 140KDa


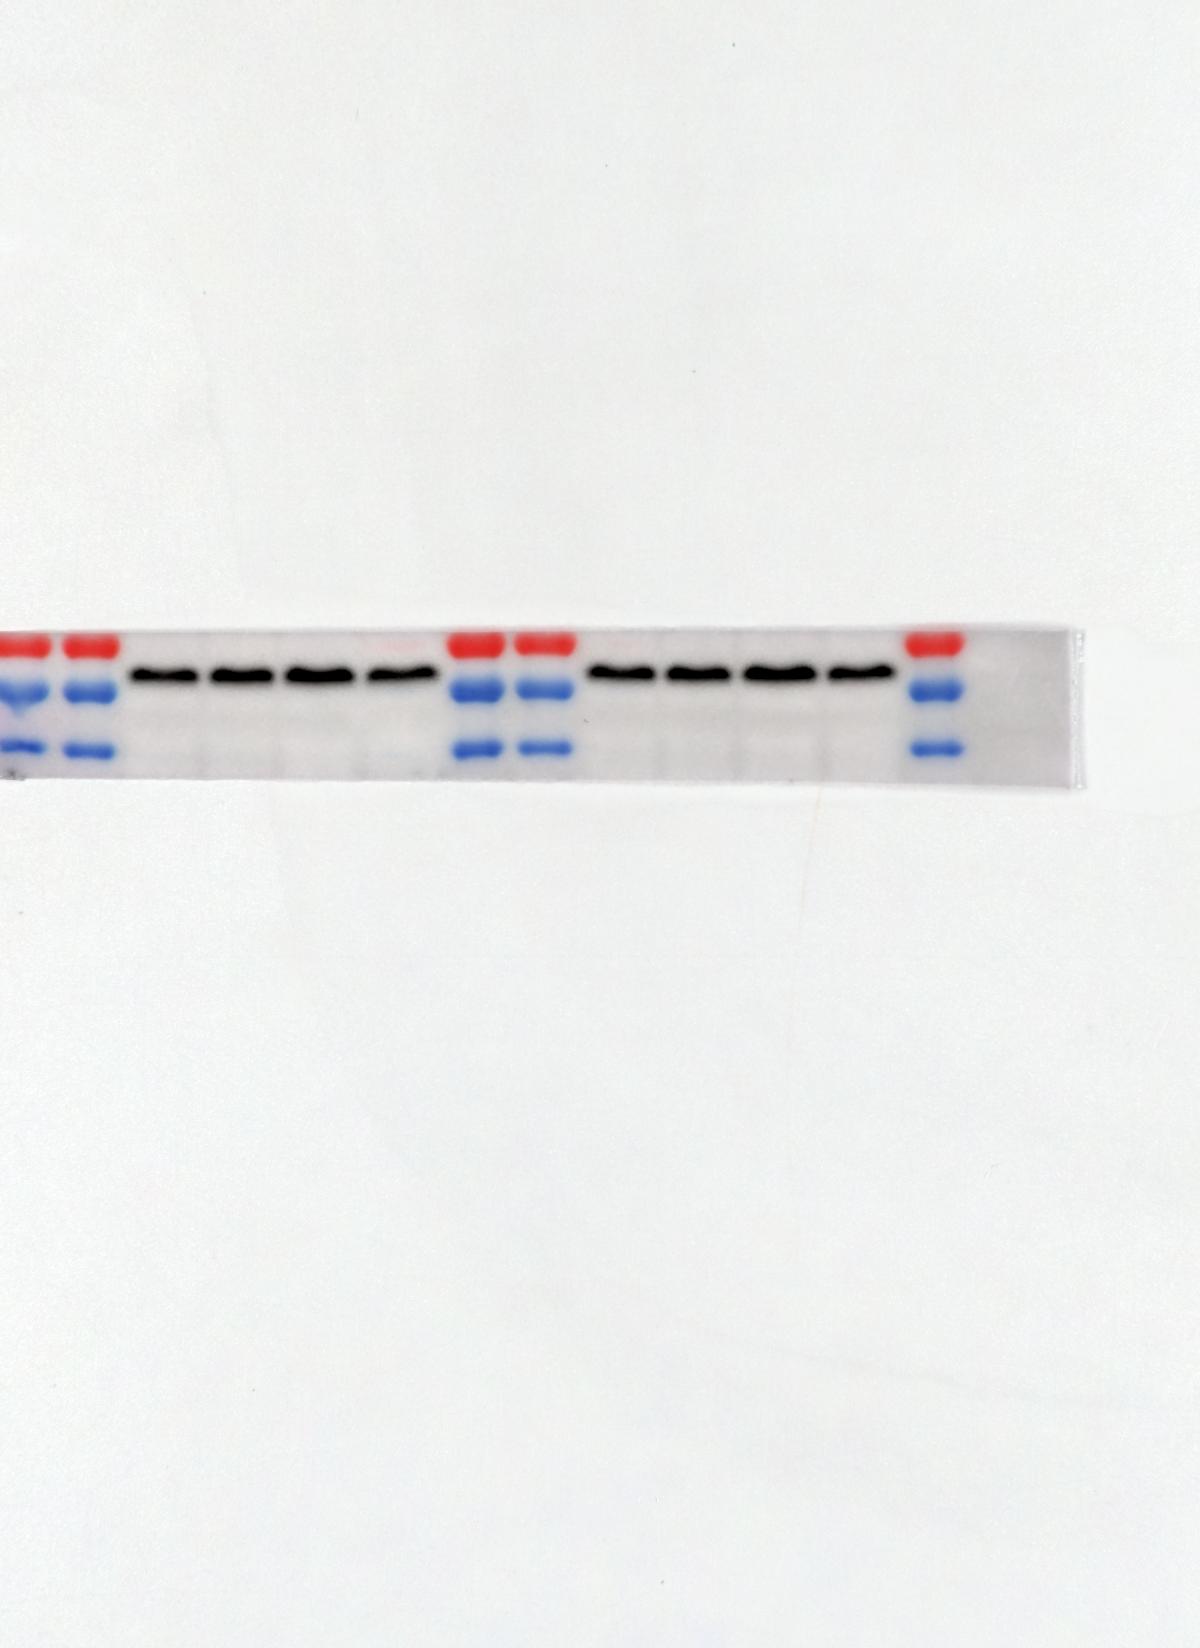


p-AMPK 62KDa


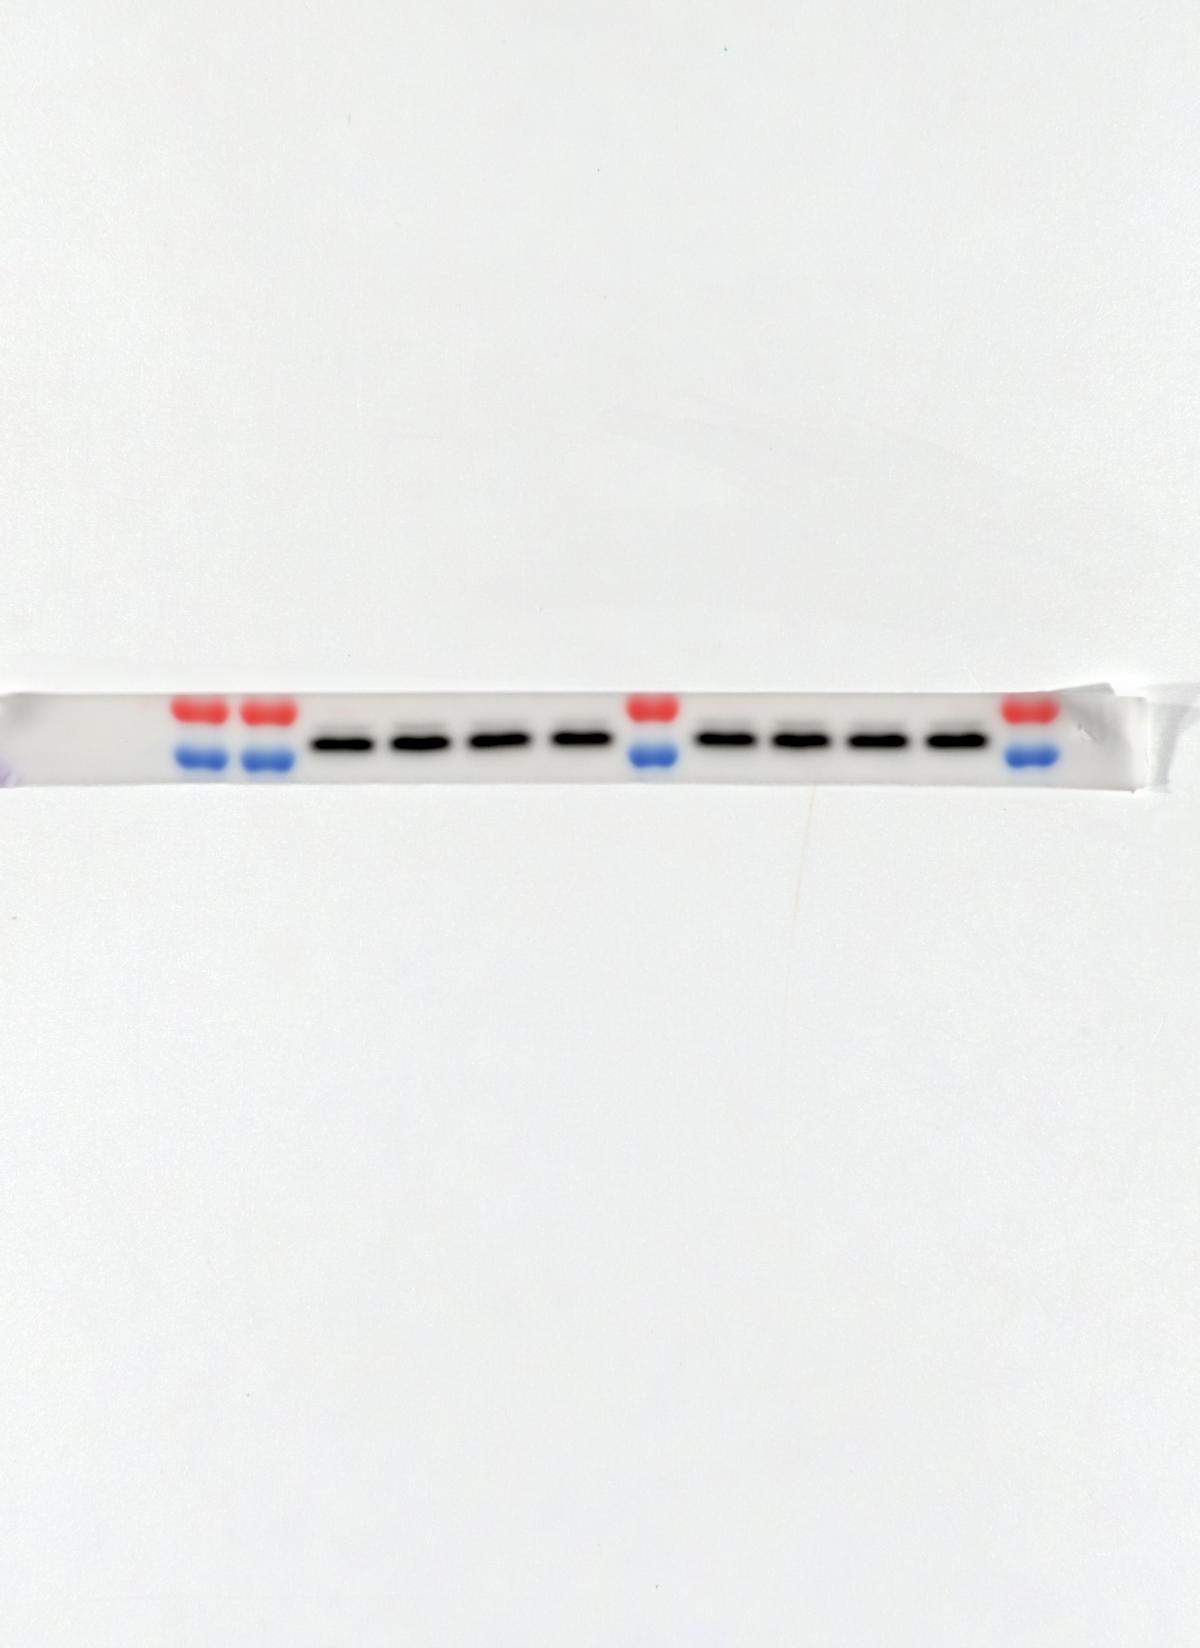


AMPK 62KDa


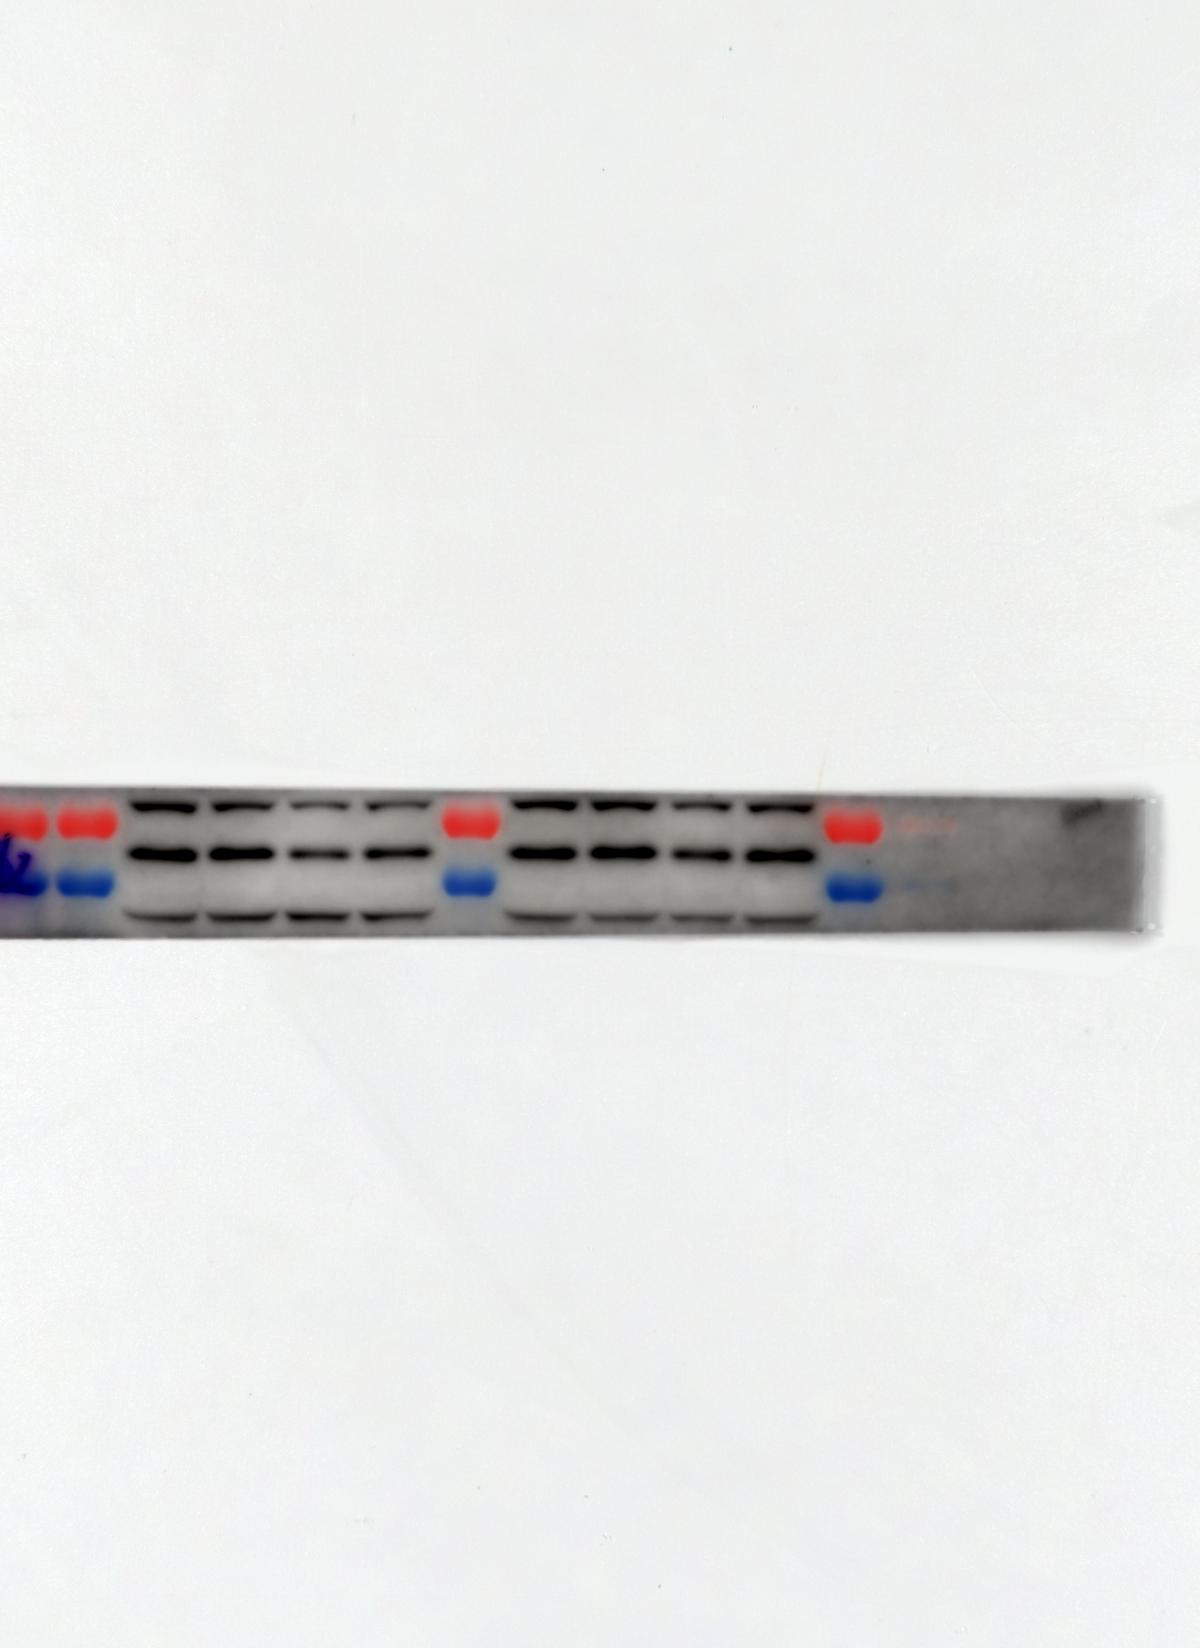


P62 62KDa


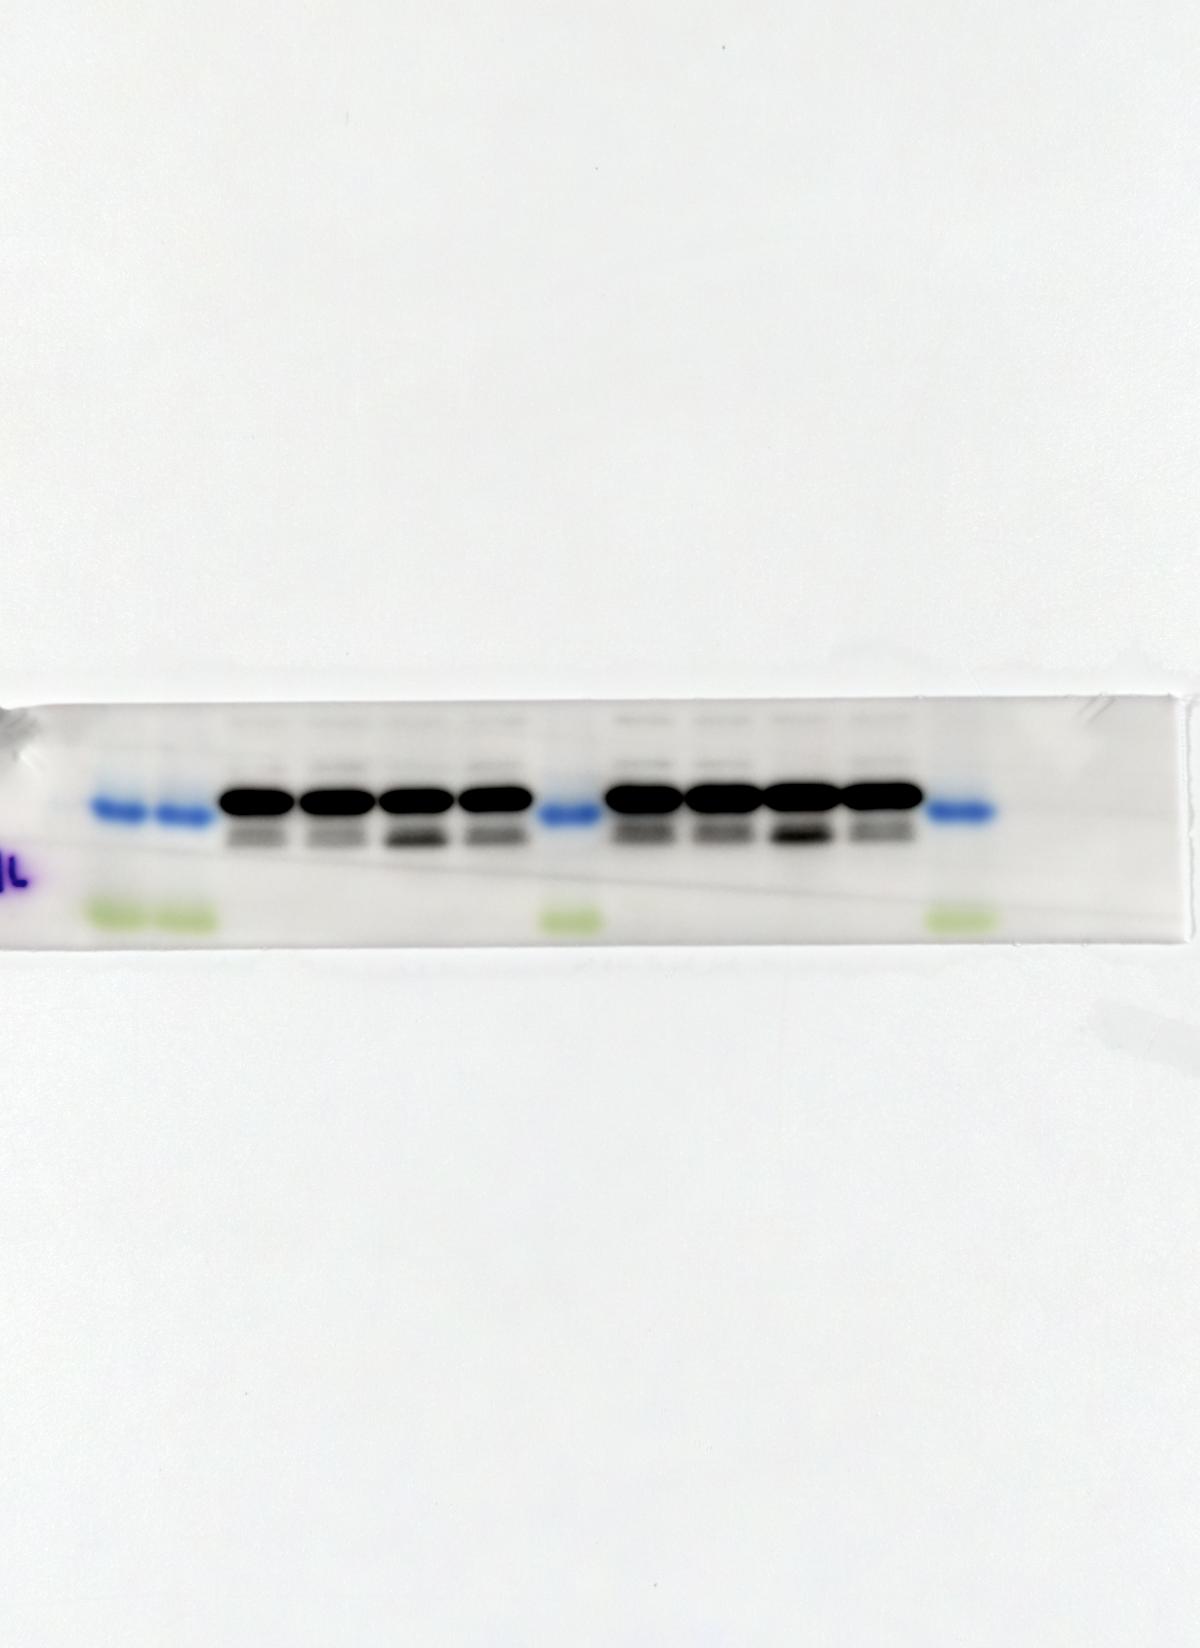


LC3B 14KDa


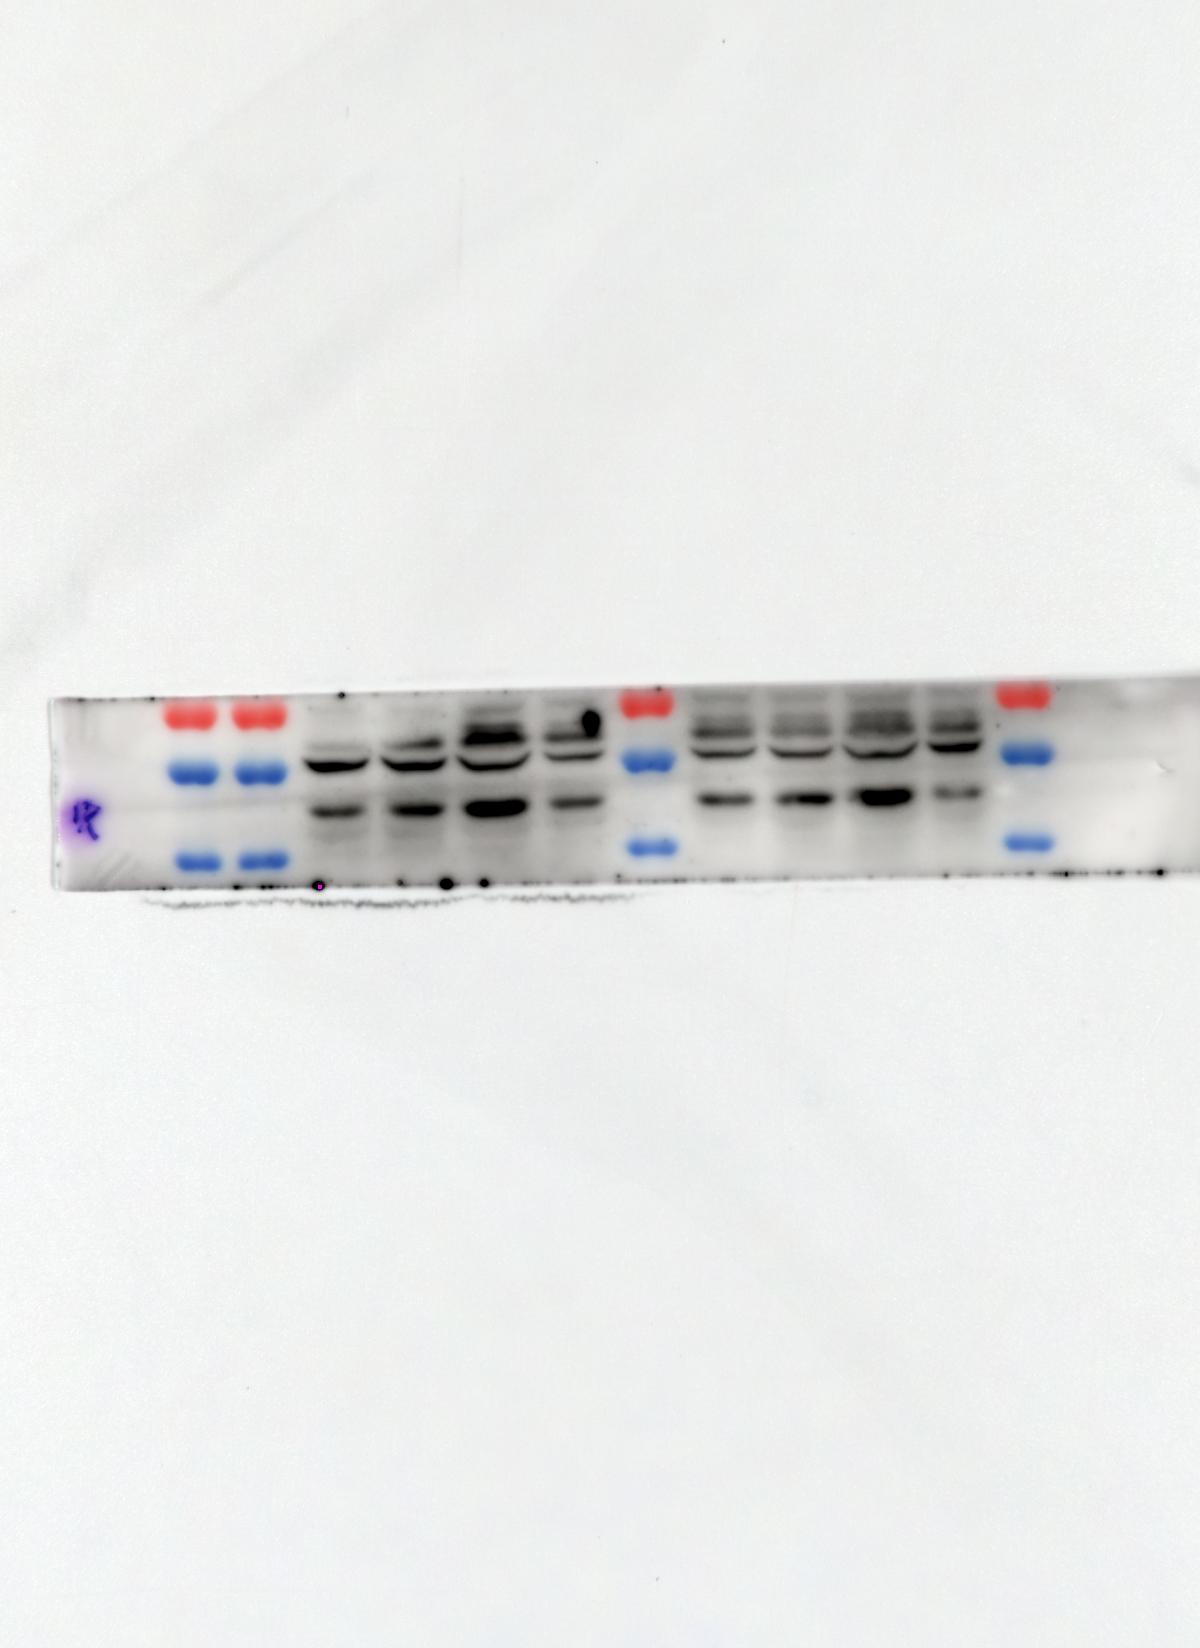


AdipoR1 43 KDa


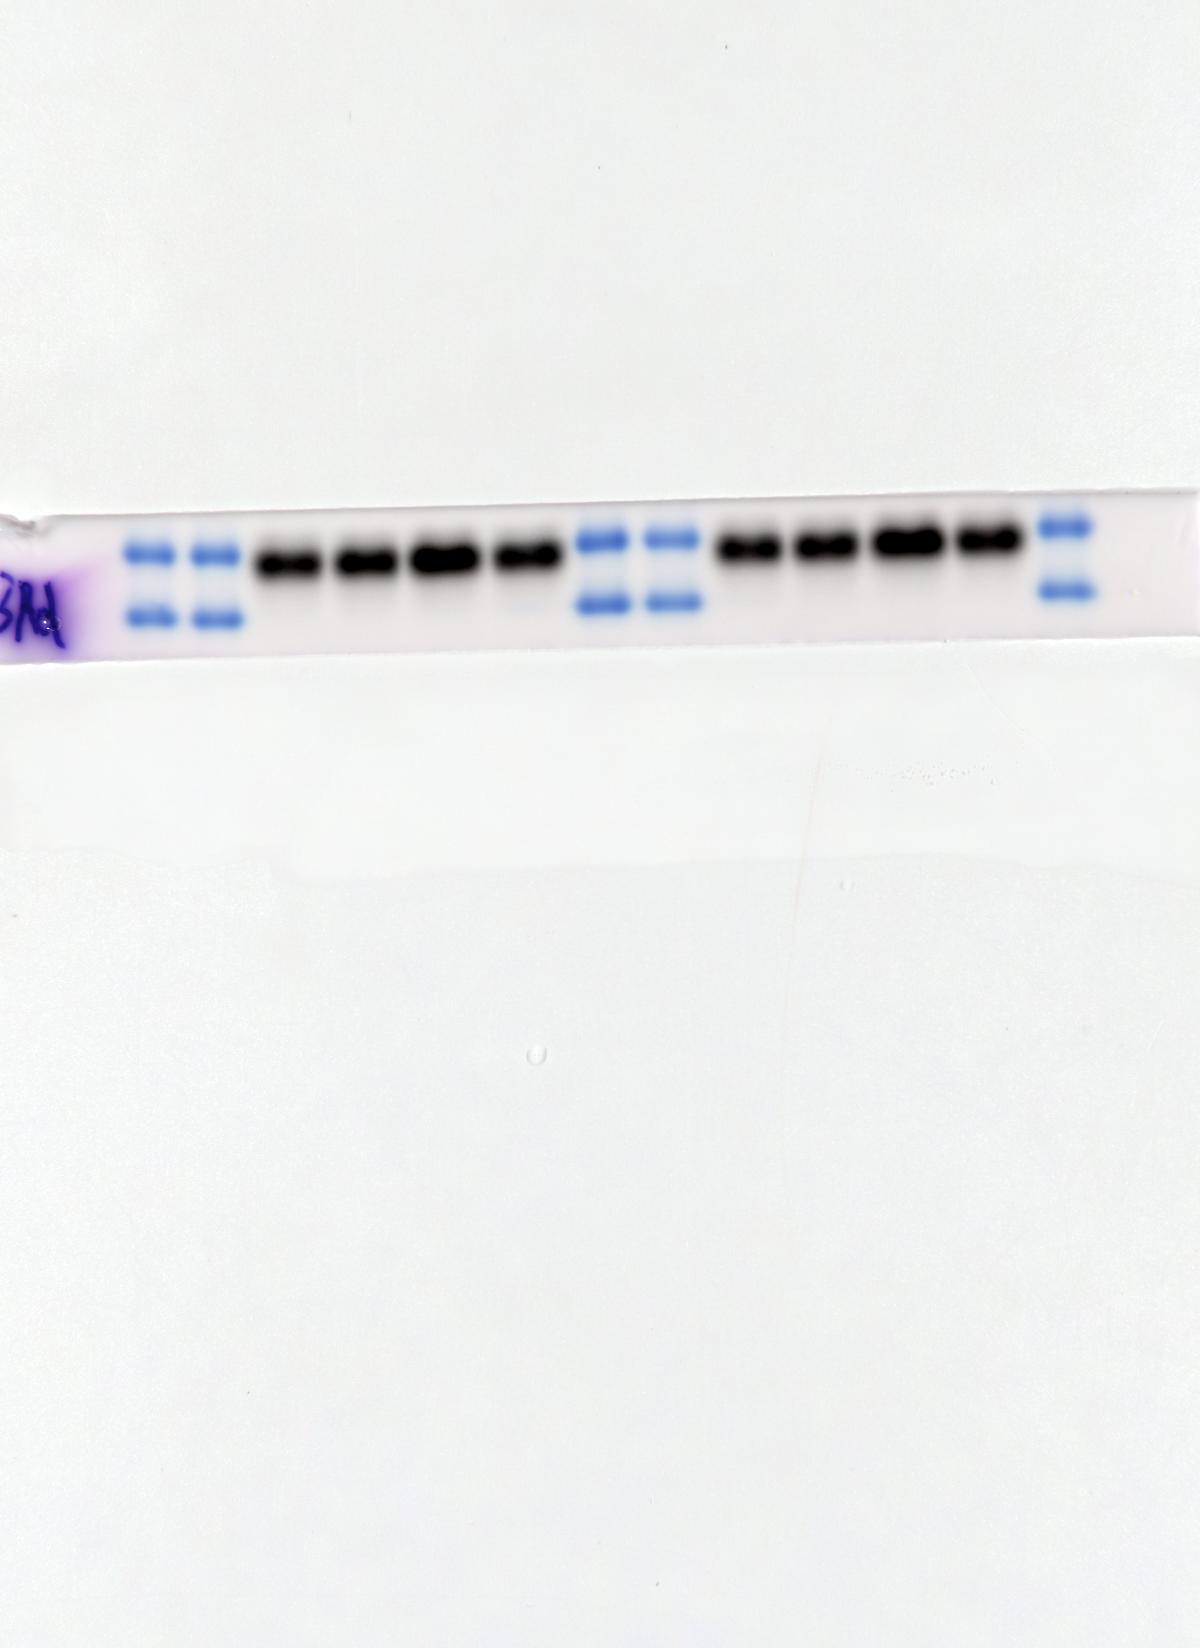


APN 26KDa


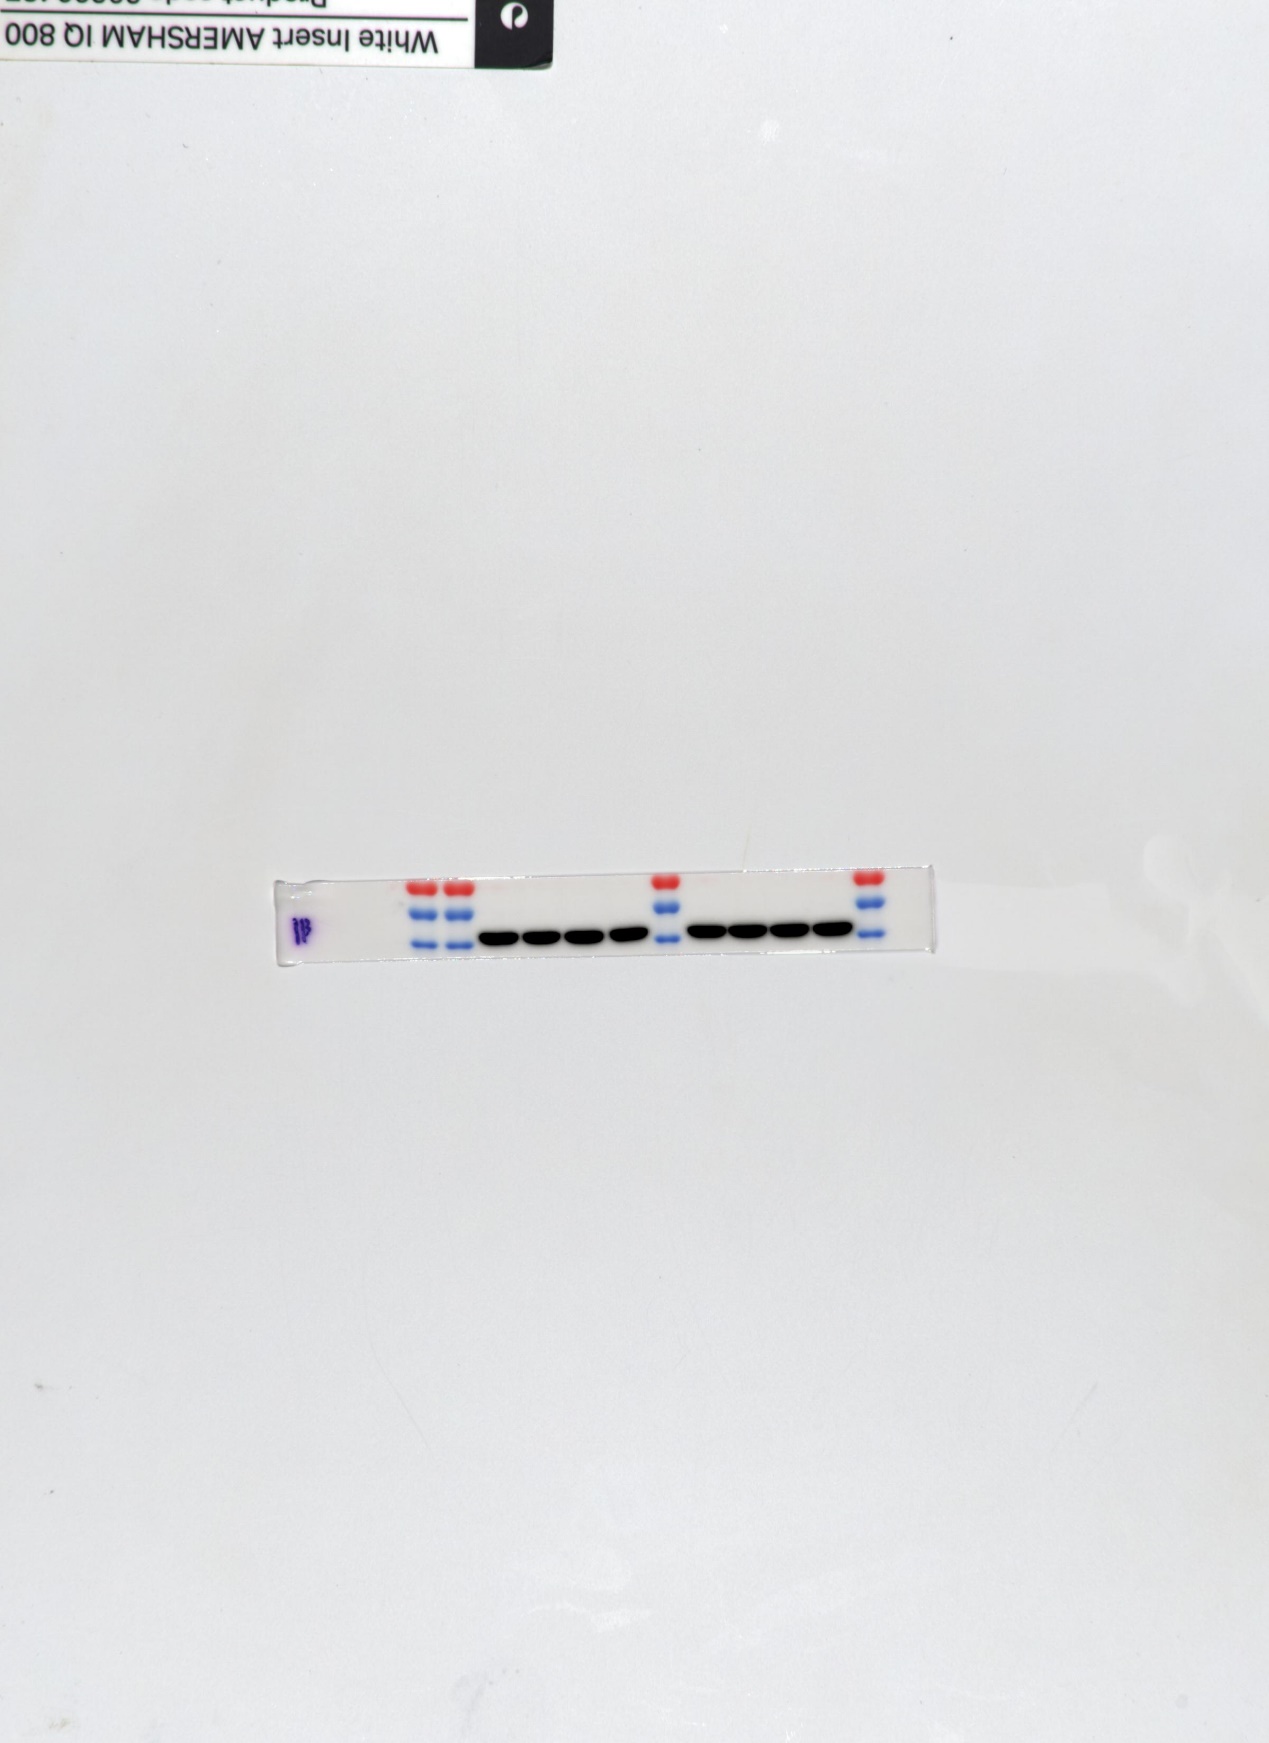


β-actin 42KDa


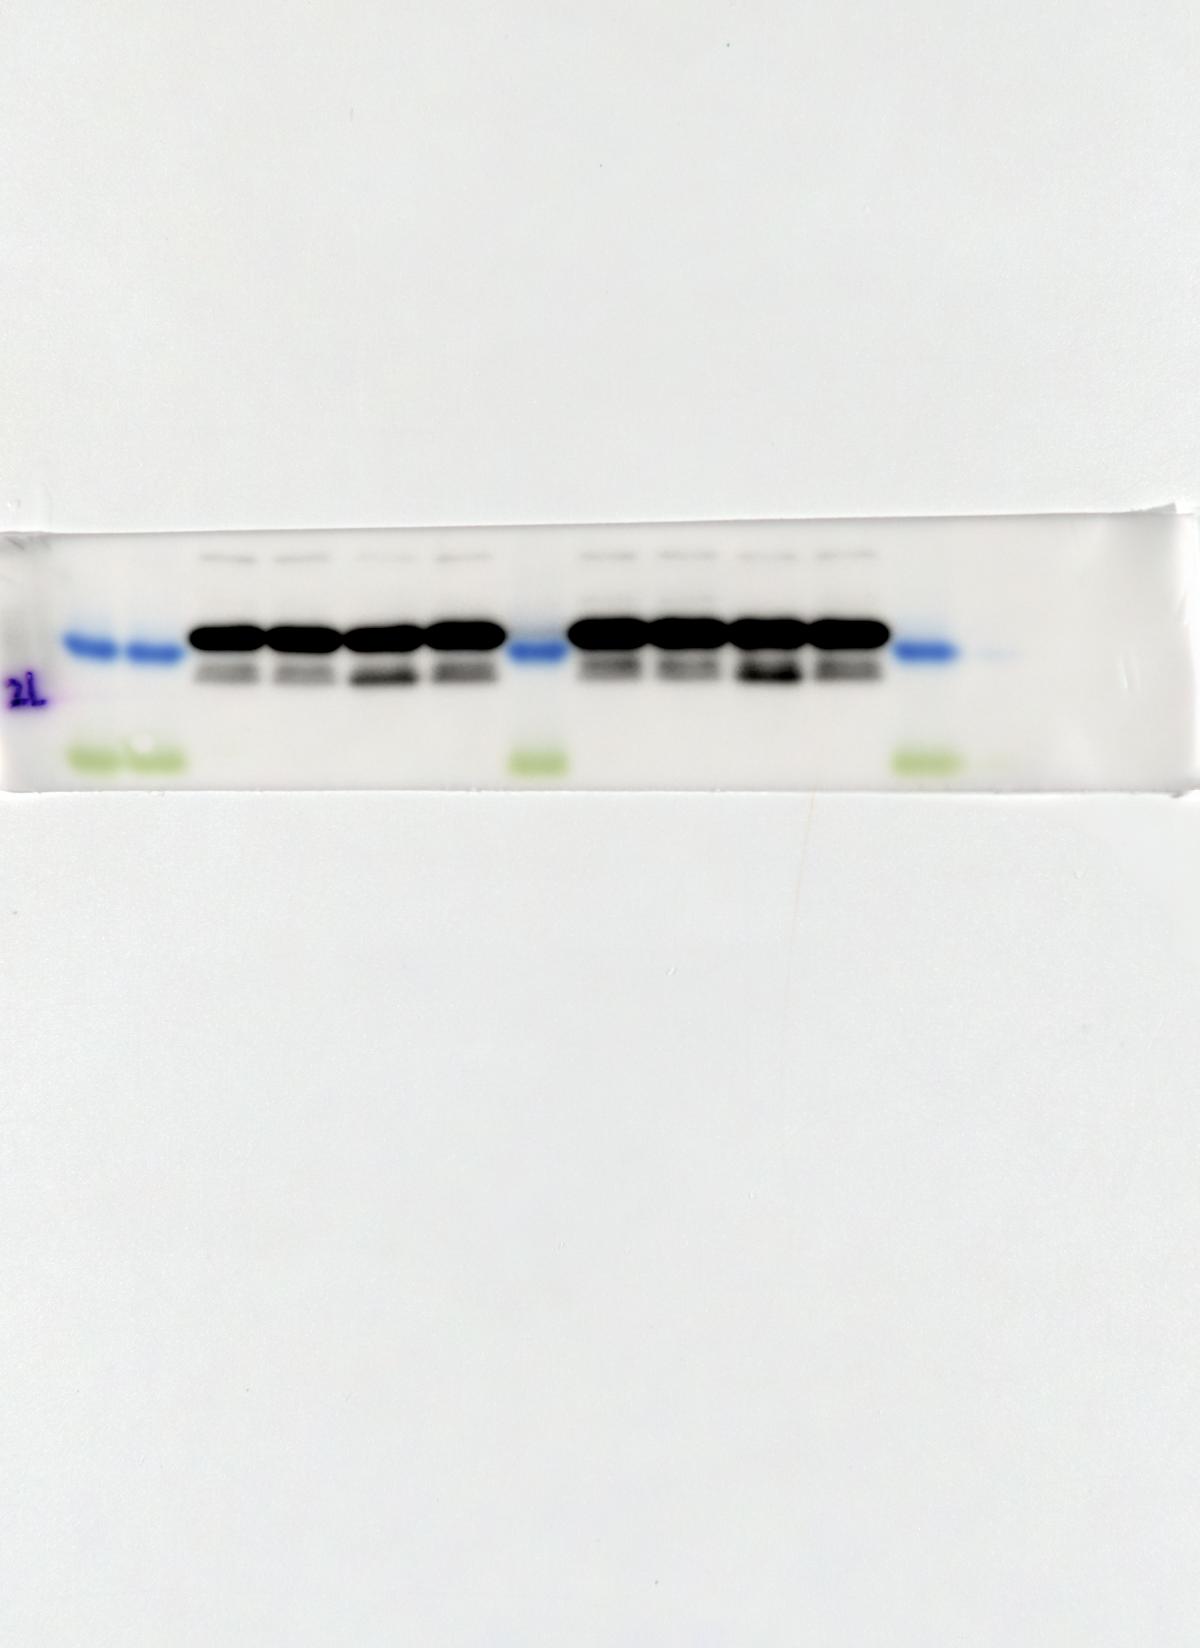


LC3B 14KDa


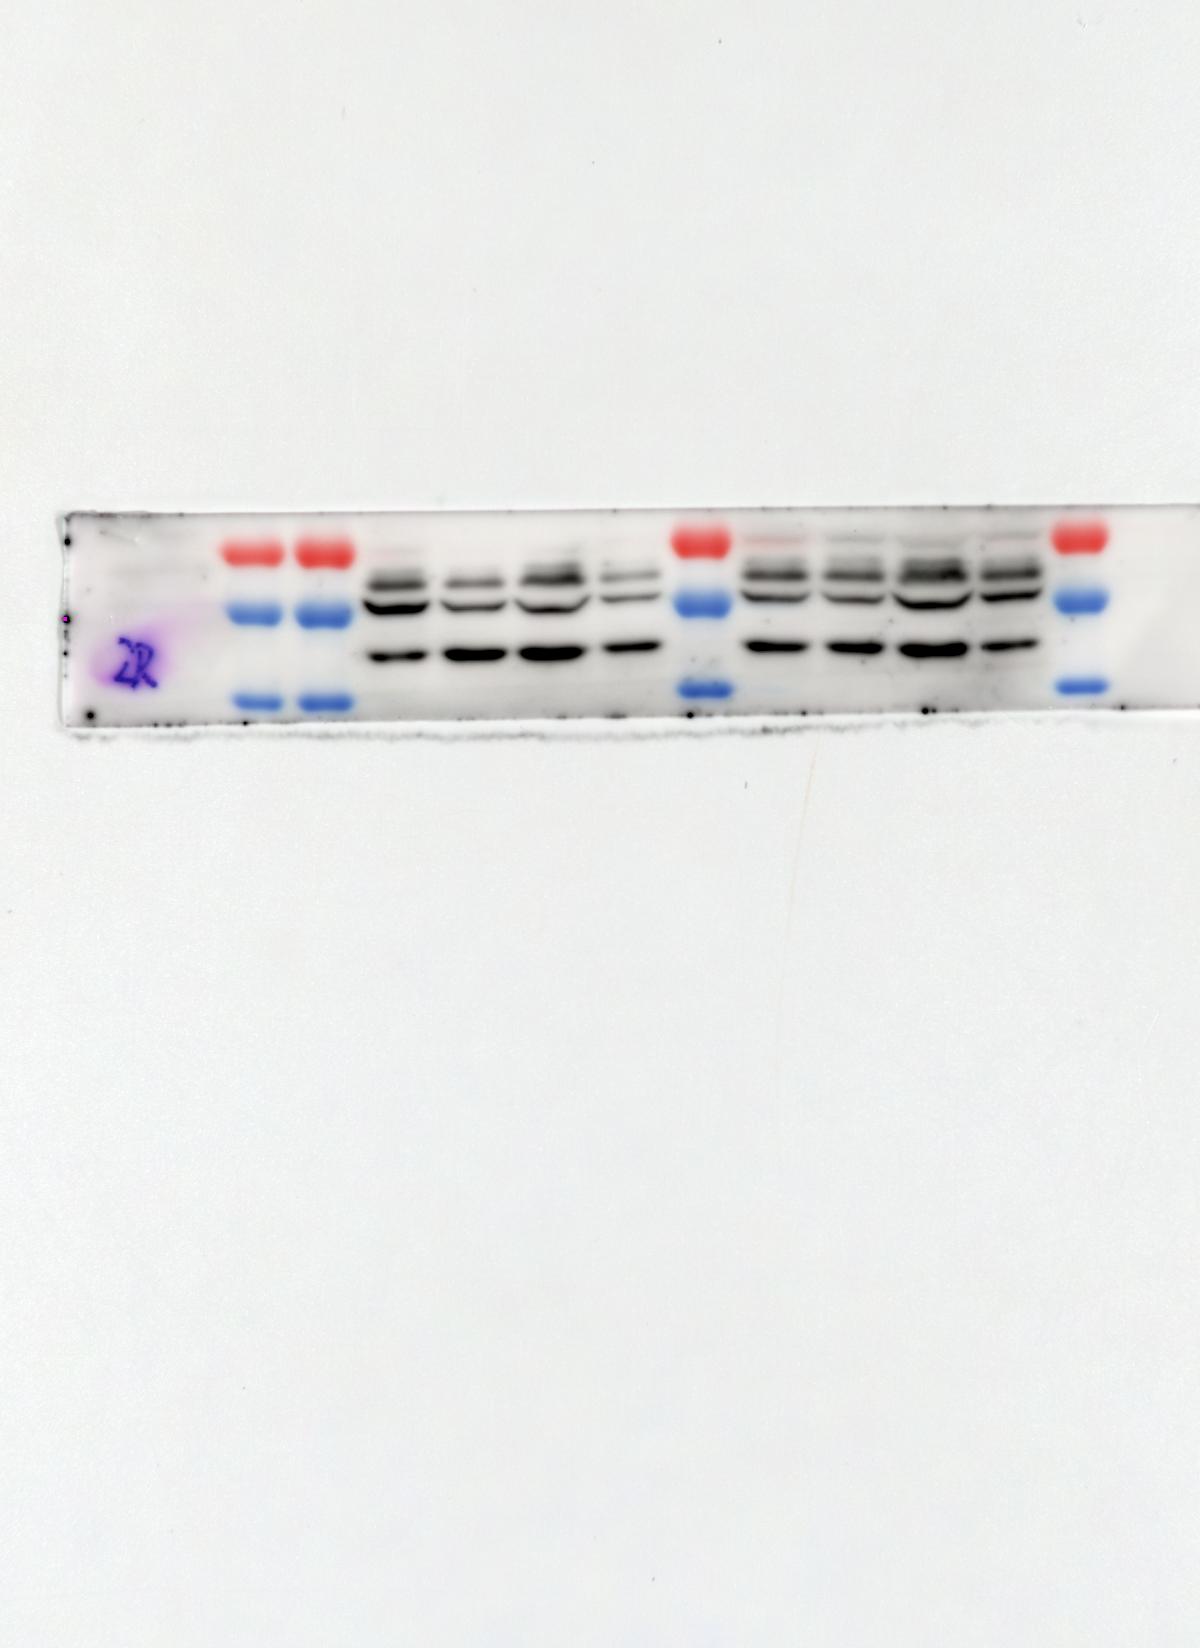


AdipoR1 42KDa


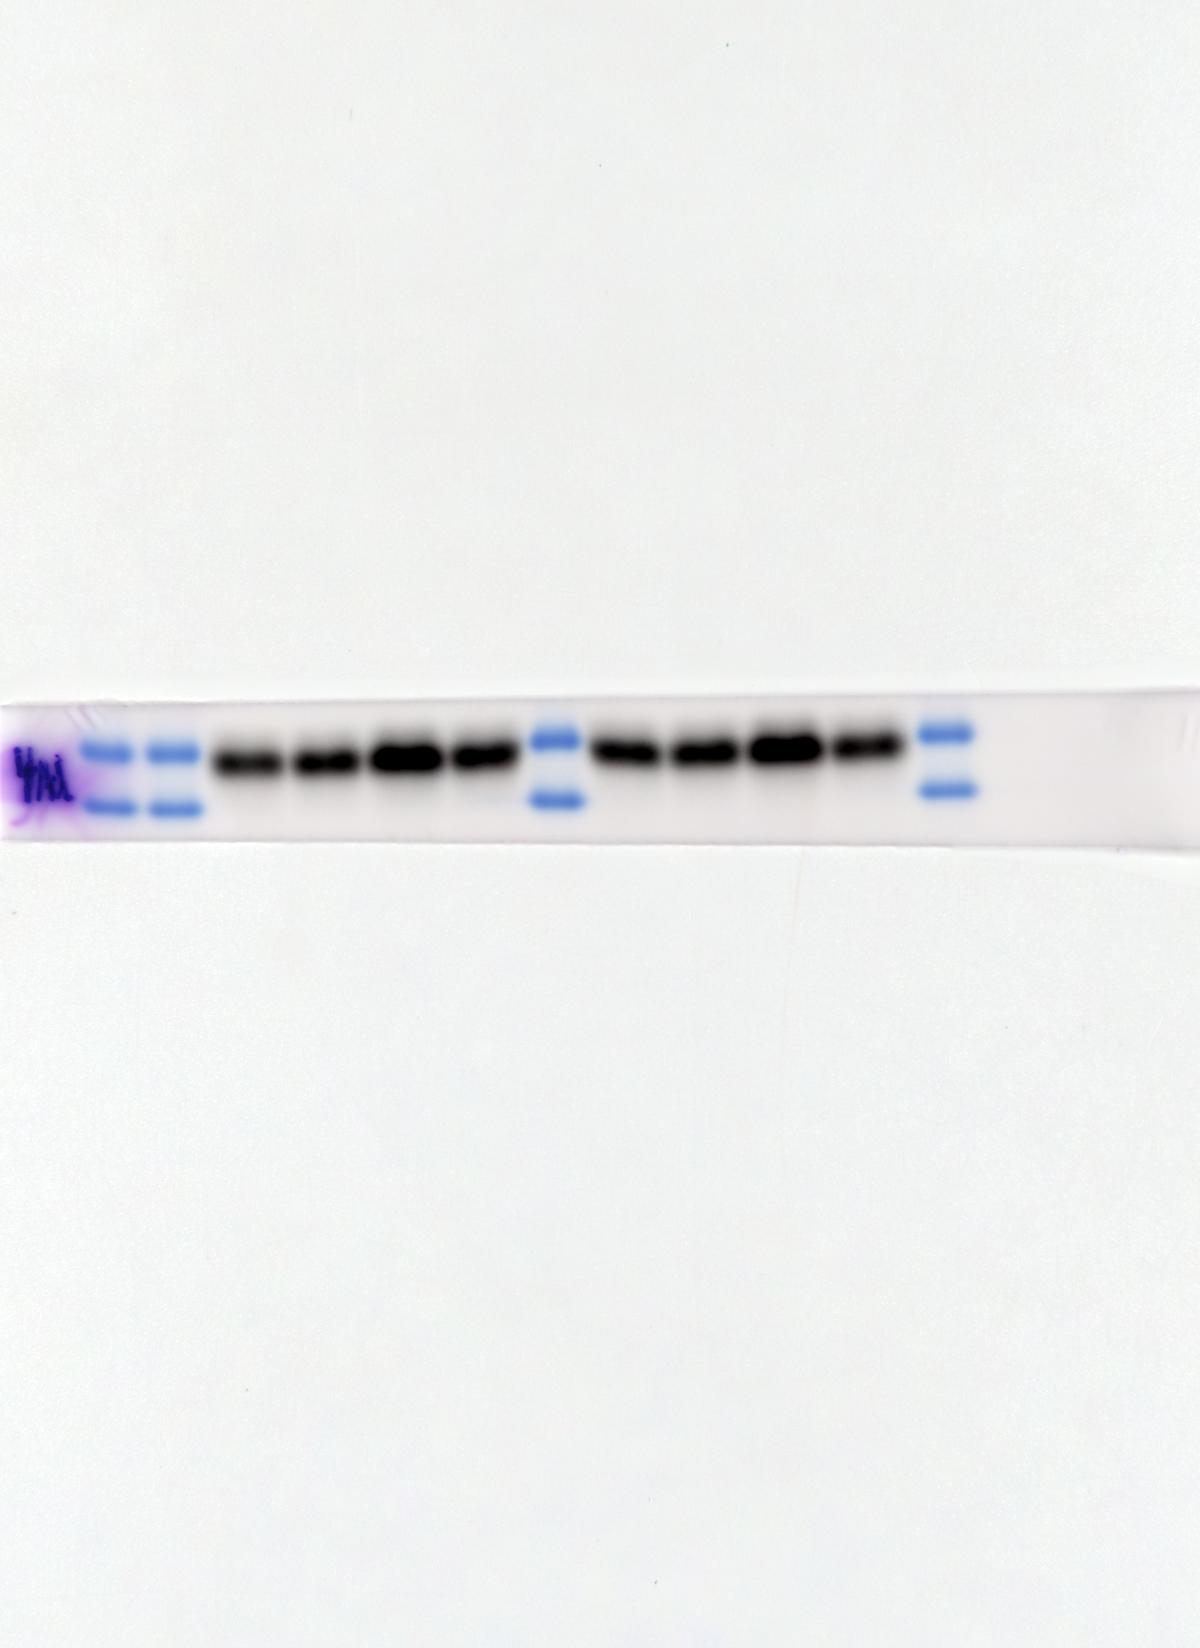


APN 26KDa


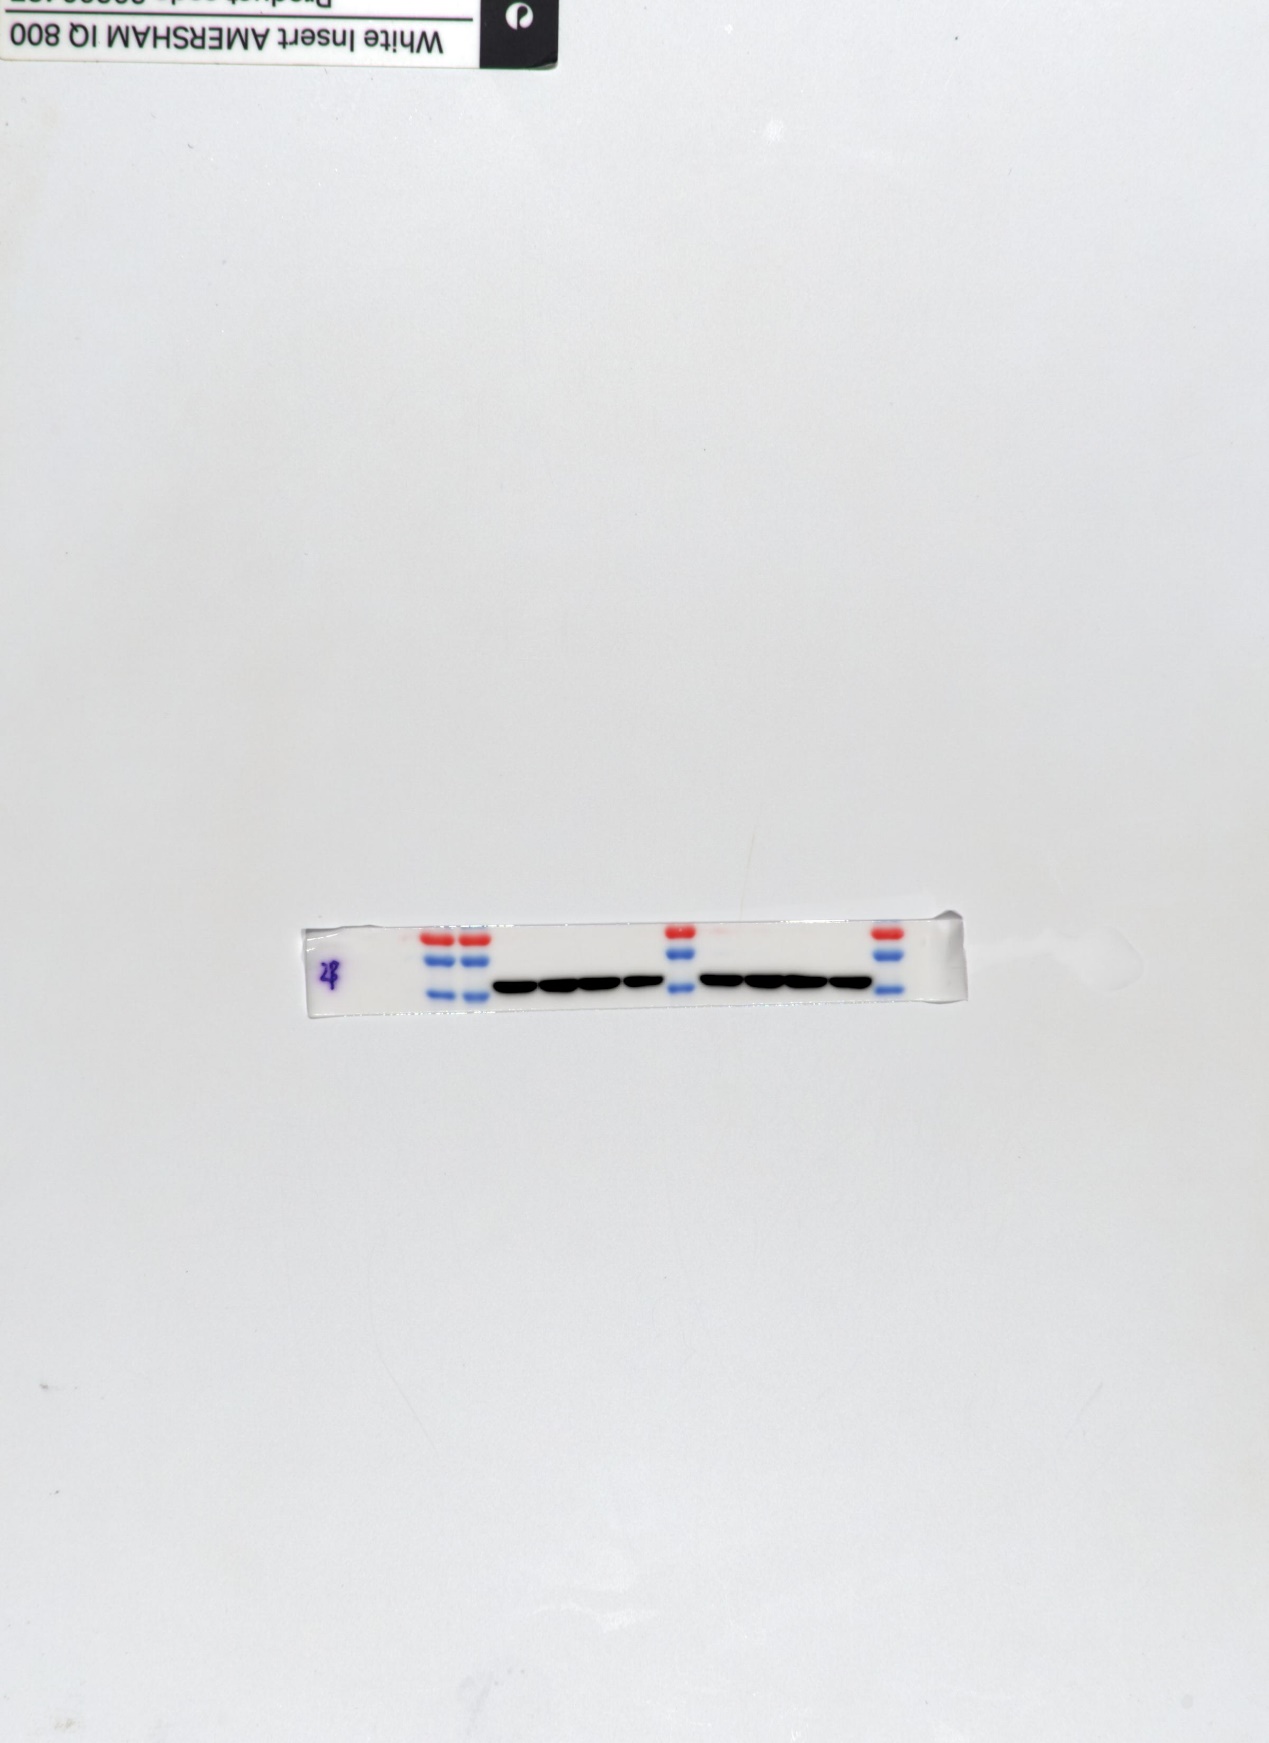


β-actin 42KDa

**Fig.6** Silencing of AdipoR1 abrogates autophagy promotion by ARC-18**.** (B) Original strip of western blot for p-AMPK/AMPK, p-ULK1/ULK1, P62, LC3B/ LC3A, APN and AdipoR1 in N2a/APPswe cells.Please refer to the manuscript for specific grouping and experimental conditions (n=4).
