# Supplementary material for: A novel arctigenin derivative ameliorates memory impairment and pathologies by activating adiponectin receptor 1-mediated autophagy and regulating amyloid precursor protein processing of Alzheimer's disease
Source: Research Square preprint supplement (doi:10.21203/rs.3.rs-7035906/v1), 2025-08-22
Supplement: Supplementary file 4 [file b598d3409b9a6eda5d71e1a9.docx]

- ARC-18 improves cognitive dysfunction and Aβ deposition in 5XFAD mice.
- ARC-18 promotes autophagy through the AdipoR1-AMPK signaling pathway to increase Aβ clearance.
- ARC-18 regulates the APP processing pathway to reduce Aβ production.
- The findings of this study provide support for ARC-18 as potential therapeutic candidate for AD treatment. It is superior to equimolar ATG.
