# Supplementary material for: A novel arctigenin derivative ameliorates memory impairment and pathologies by activating adiponectin receptor 1-mediated autophagy and regulating amyloid precursor protein processing of Alzheimer's disease
Source: Research Square preprint supplement (doi:10.21203/rs.3.rs-7035906/v1), 2025-08-22
Supplement: Supplementary file 5 [file ef7bba424c747471b4adc612.docx]

| Company | Antibody name | Antibody number |
| --- | --- | --- |
| Cell Signaling Technology | β-actin | #4970 |
| Abcam | AdipoR1 | ab70362 |
| Cell Signaling Technology | p-AMPK | #50081 |
| Cell Signaling Technology | AMPK | #5831 |
| Abcam | p-ULK1 | ab229909 |
| Abcam | ULK1 | ab177472 |
| Cell Signaling Technology | LC3B | #43566s |
| Immumono-Biological-Labotatory | sAPPα | 11088 |
| Immumono-Biological-Labotatory | sAPPβ | 18957 |
| Cell Signaling Technology | BACE1 | #5606 |
| Cell Signaling Technology | P62 | #23214 |
| Cell Signaling Technology | p-mTOR | #5536 |
| Cell Signaling Technology | mTOR | #2983 |
| Cell Signaling Technology | Presenilin 1(PS1) | #5643 |
| Cell Signaling Technology | Lamp1 | #15665 |
| Cell Signaling Technology | Cathepsin D(CTSD) | #74089 |
| Cell Signaling Technology | ATG5 | #12994 |
| Cell Signaling Technology | Beclin1 | #3495 |

**Table S1**. Information of primary antibodies

| Drug dose of ARC-18 (mg/kg) | Number of animals | Number of deaths | mortality rate |
| --- | --- | --- | --- |
| 200 | 10 | 0 | 0% |
| 400 | 10 | 0 | 0% |
| 600 | 10 | 1 | 10% |
| 800 | 10 | 3 | 30% |
| 1000 | 10 | 5 | 50% |
| 1200 | 10 | 6 | 60% |
| 1400 | 10 | 8 | 80% |
| 1600 | 10 | 10 | 100% |

**Table S2.** Acute toxicity of ARC-18 in C57 mice

| ARC-18-PO-35.0 mg/kg | | | | | |
| --- | --- | --- | --- | --- | --- |
| ATG-blood concentration-ng/ml | | | | | |
| Time (h) | 201a | 202a | 203a | Mean | SD |
| 0.25 | 5.95083 | 20.4308 | 10.7491 | 12.38 | 7.38 |
| 0.5 | 16.6284 | 23.4087 | 20.5783 | 20.21 | 3.41 |
| 1 | 21.3998 | 27.9299 | 23.1376 | 24.16 | 3.38 |
| 2 | 15.6329 | 18.1646 | 16.8468 | 16.88 | 1.27 |
| 4 | 7.9571 | 9.3714 | BLQ | 8.66 | 1.00 |
| 6 | BLQ | 3.40577 | BLQ | NA | NA |
| 8 | BLQ | BLQ | BLQ | NA | NA |
| 24 | BLQ | BLQ | BLQ | NA | NA |

**Table S3.** Drug concentration of ATG in plasma of SD rats after oral administration of ARC-18 by single gavage

| ATG-PO-21.6 mg/kg | | | | | |
| --- | --- | --- | --- | --- | --- |
| ATG-blood concentration-ng/ml | | | | | |
| Time (h) | 201 | 202 | 203 | Mean | SD |
| 0.25 | 2.74 | 4.31 | 13.43 | 6.83 | 5.77 |
| 0.5 | 1.97 | 7.97 | 13.80 | 7.91 | 5.92 |
| 1 | 1.58 | 10.63 | 13.36 | 8.52 | 6.17 |
| 2 | 13.18 | 14.96 | 16.27 | 14.80 | 1.55 |
| 4 | 0.63 | 6.08 | 7.32 | 4.68 | 3.56 |
| 6 | 0.70 | BLQ | 6.56 | 3.63 | 4.14 |
| 8 | 1.15 | 3.42 | 2.08 | 2.21 | 1.14 |
| 24 | 1.10 | 2.56 | 2.82 | 2.16 | 0.93 |

**Table S4.** Drug concentration in plasma of SD rats after single oral administration of ATG by gavage

Abbreviation

AD, Alzheimer's disease; ATG, arctigenin; Aβ. amyloid beta; APP, amyloid precursor protein;3-MA, 3-Methyladenine; CQ, chloroquine; AdipoR1, adiponectin receptor 1;AdipoR2, Adiponectin receptor protein 2; AMPK, AMP-activated protein ; CTSD, Cathepsin D; LC3B,Microtubule-associated proteins light chain 3B; ATG5, Autophagy protein 5; ; Lamp1, Lysosome-associated membrane glycoprotein 1;mTOR, mammalian target of rapamycin; ULK1, UNC-51-like kinase 1;P62, Sequestosome 1;BACE1, β-secretase 1; PS1, Presenilin 1;sAPPα, Soluble amyloid precursor protein alpha; sAPPβ, Soluble amyloid precursor protein beta.


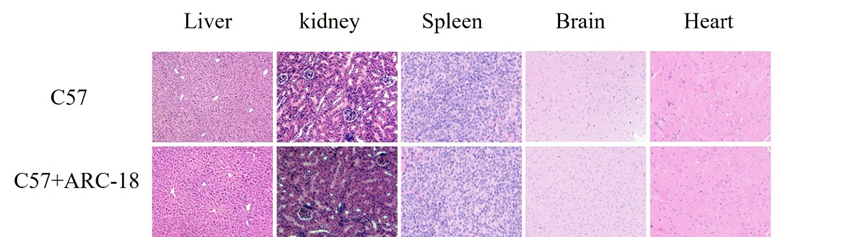


**Fig S1.** HE staining results of ARC-18 in various organism under a microscope at 100× magnification.


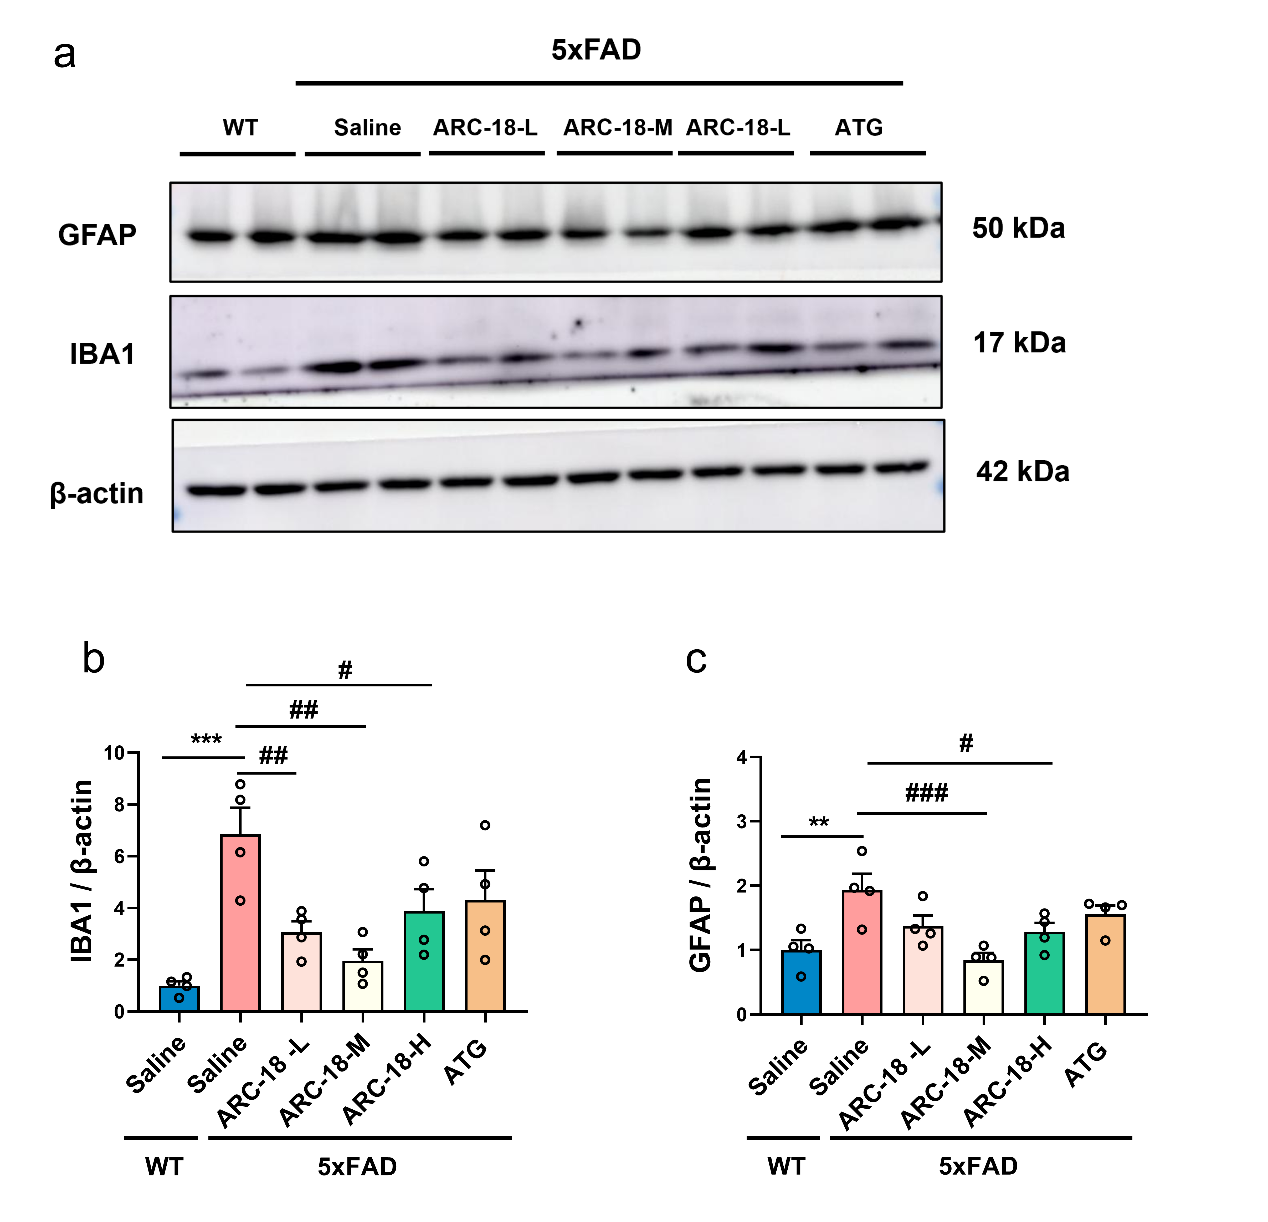


**Fig S2.** ARC-18 alleviated neuroinflammation in 5xFAD mice. (**a**) Western blots of GFAP and IBA1 (**b**) The quantitative analysis of the expression of IBA1 (**c**) The quantitative analysis of the expression of GFAP. Data are expressed as mean ± SEM. **P< 0.01 and ***P< 0.001 vs. Wild type mice; #P< 0.05, ##P< 0.01 and ###P< 0.001 vs. 5xFAD mice.


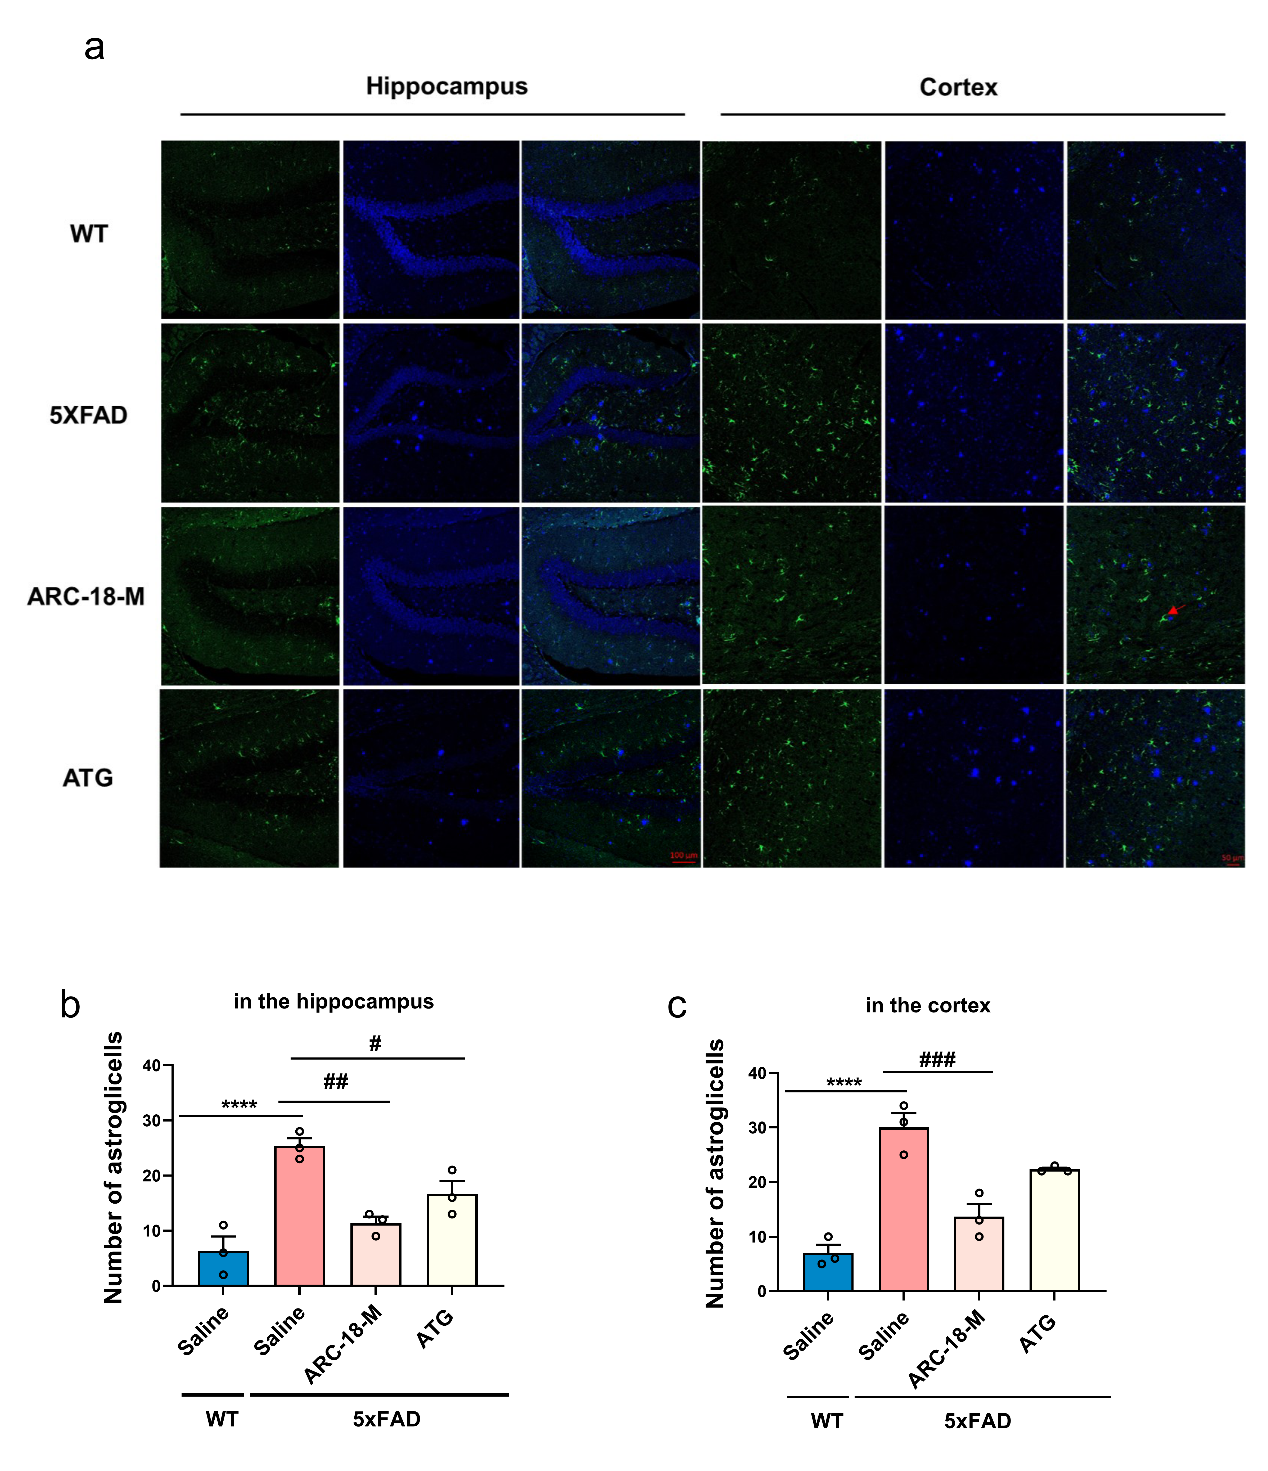


**Fig S3.** ARC-18 alleviated neuroinflammation in 5xFAD mice. (**a**) GFAP immunofluorescence results (**b**) The quantitative analysis of GFAP in the hippocampus. (**c**) The quantitative analysis of GFAP in the cortex. Data are expressed as mean ± SEM. ****P< 0.0001 vs. Wild type mice; #P< 0.05, ##P< 0.01 and ###P< 0.001 vs. 5xFAD mice.
