# Supplementary material for: A novel arctigenin derivative ameliorates memory impairment and pathologies by activating adiponectin receptor 1-mediated autophagy and regulating amyloid precursor protein processing of Alzheimer's disease
Source: Research Square preprint supplement (doi:10.21203/rs.3.rs-7035906/v1), 2025-08-22
Supplement: Supplementary file 6 [file fc45ed3d3e3be6dfcc1a393a.docx]

Figure 4A


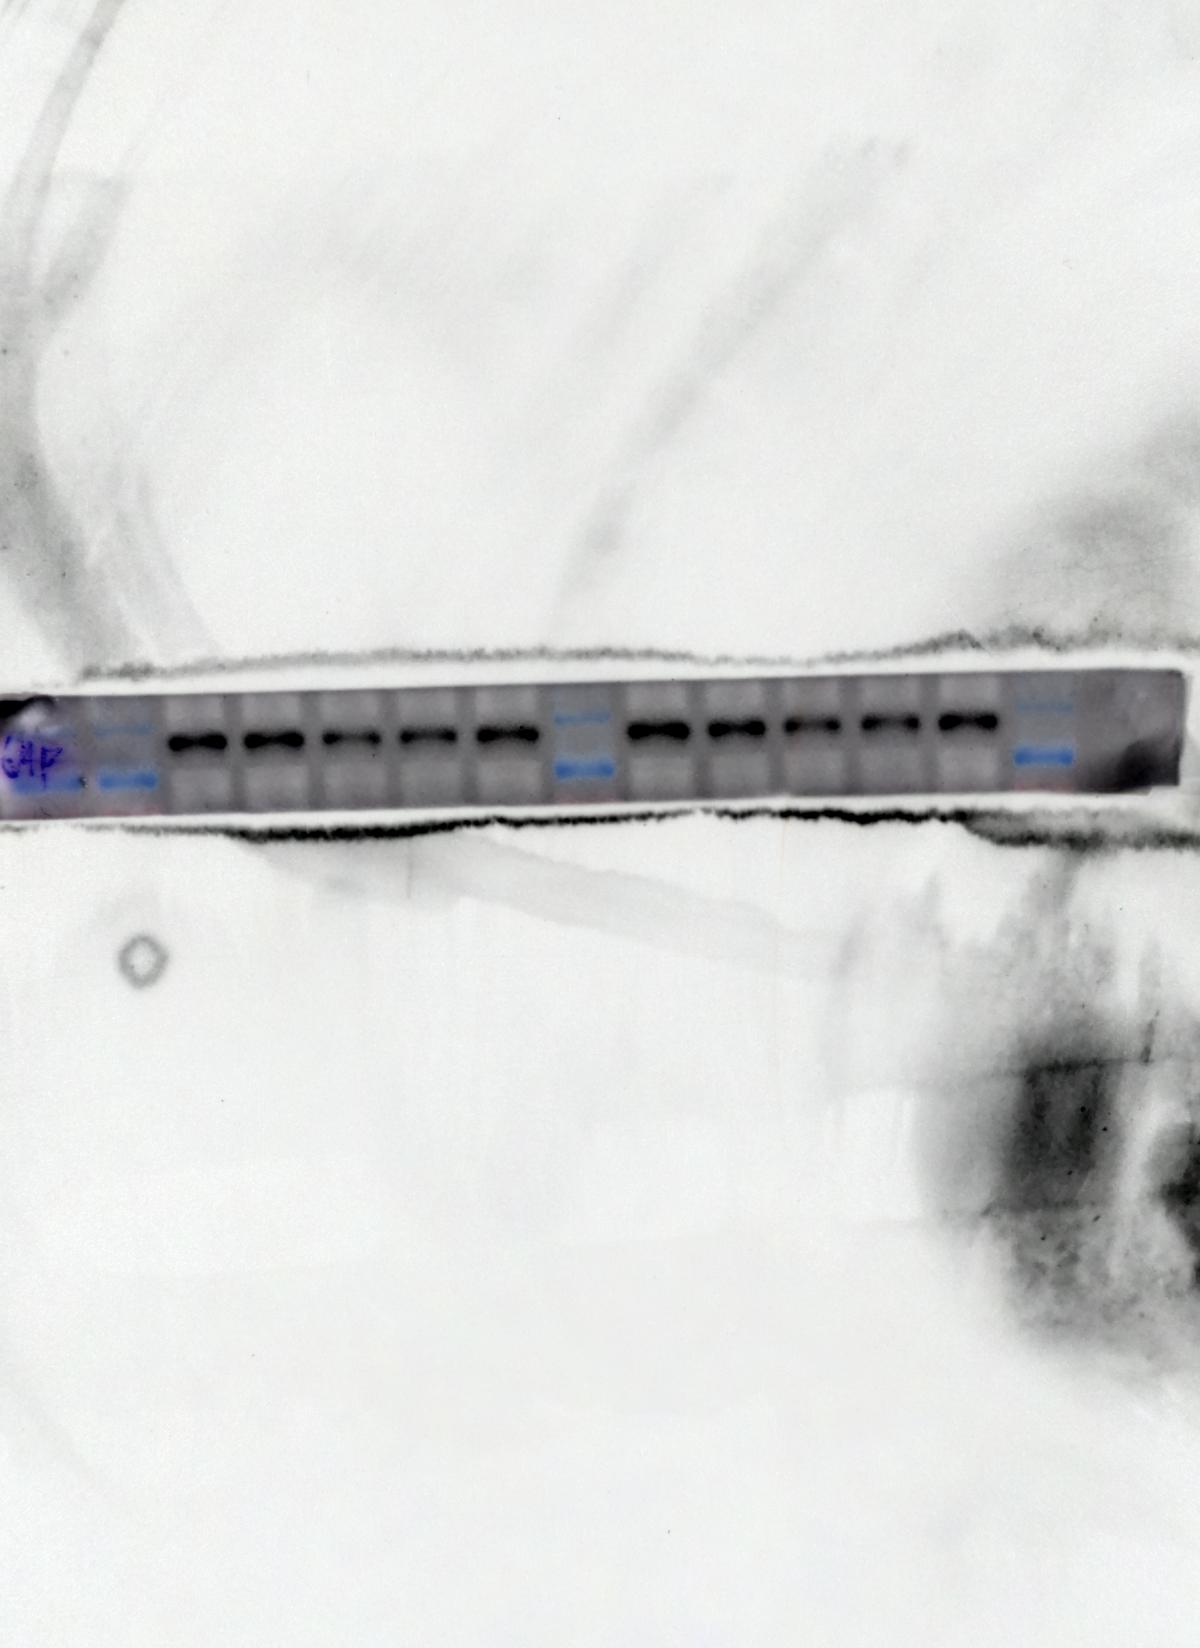


APP 110KDa


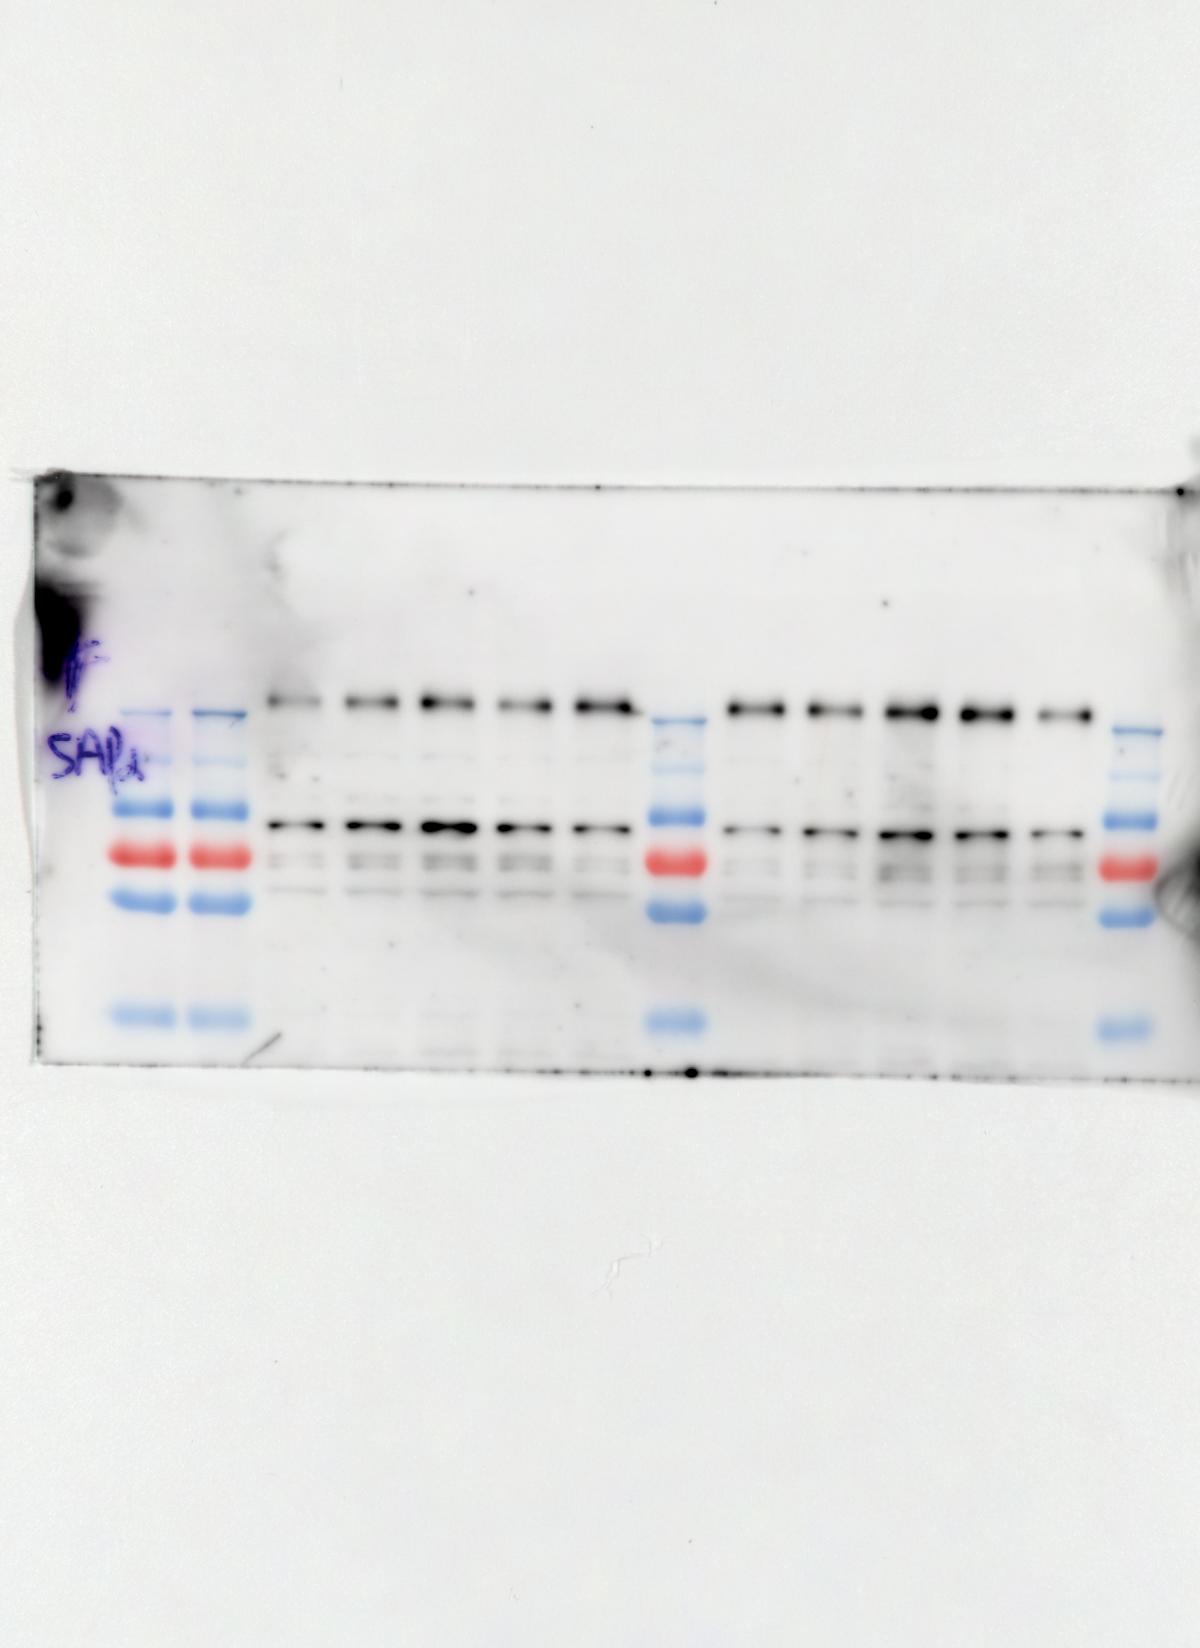


sAPPα 97KDa


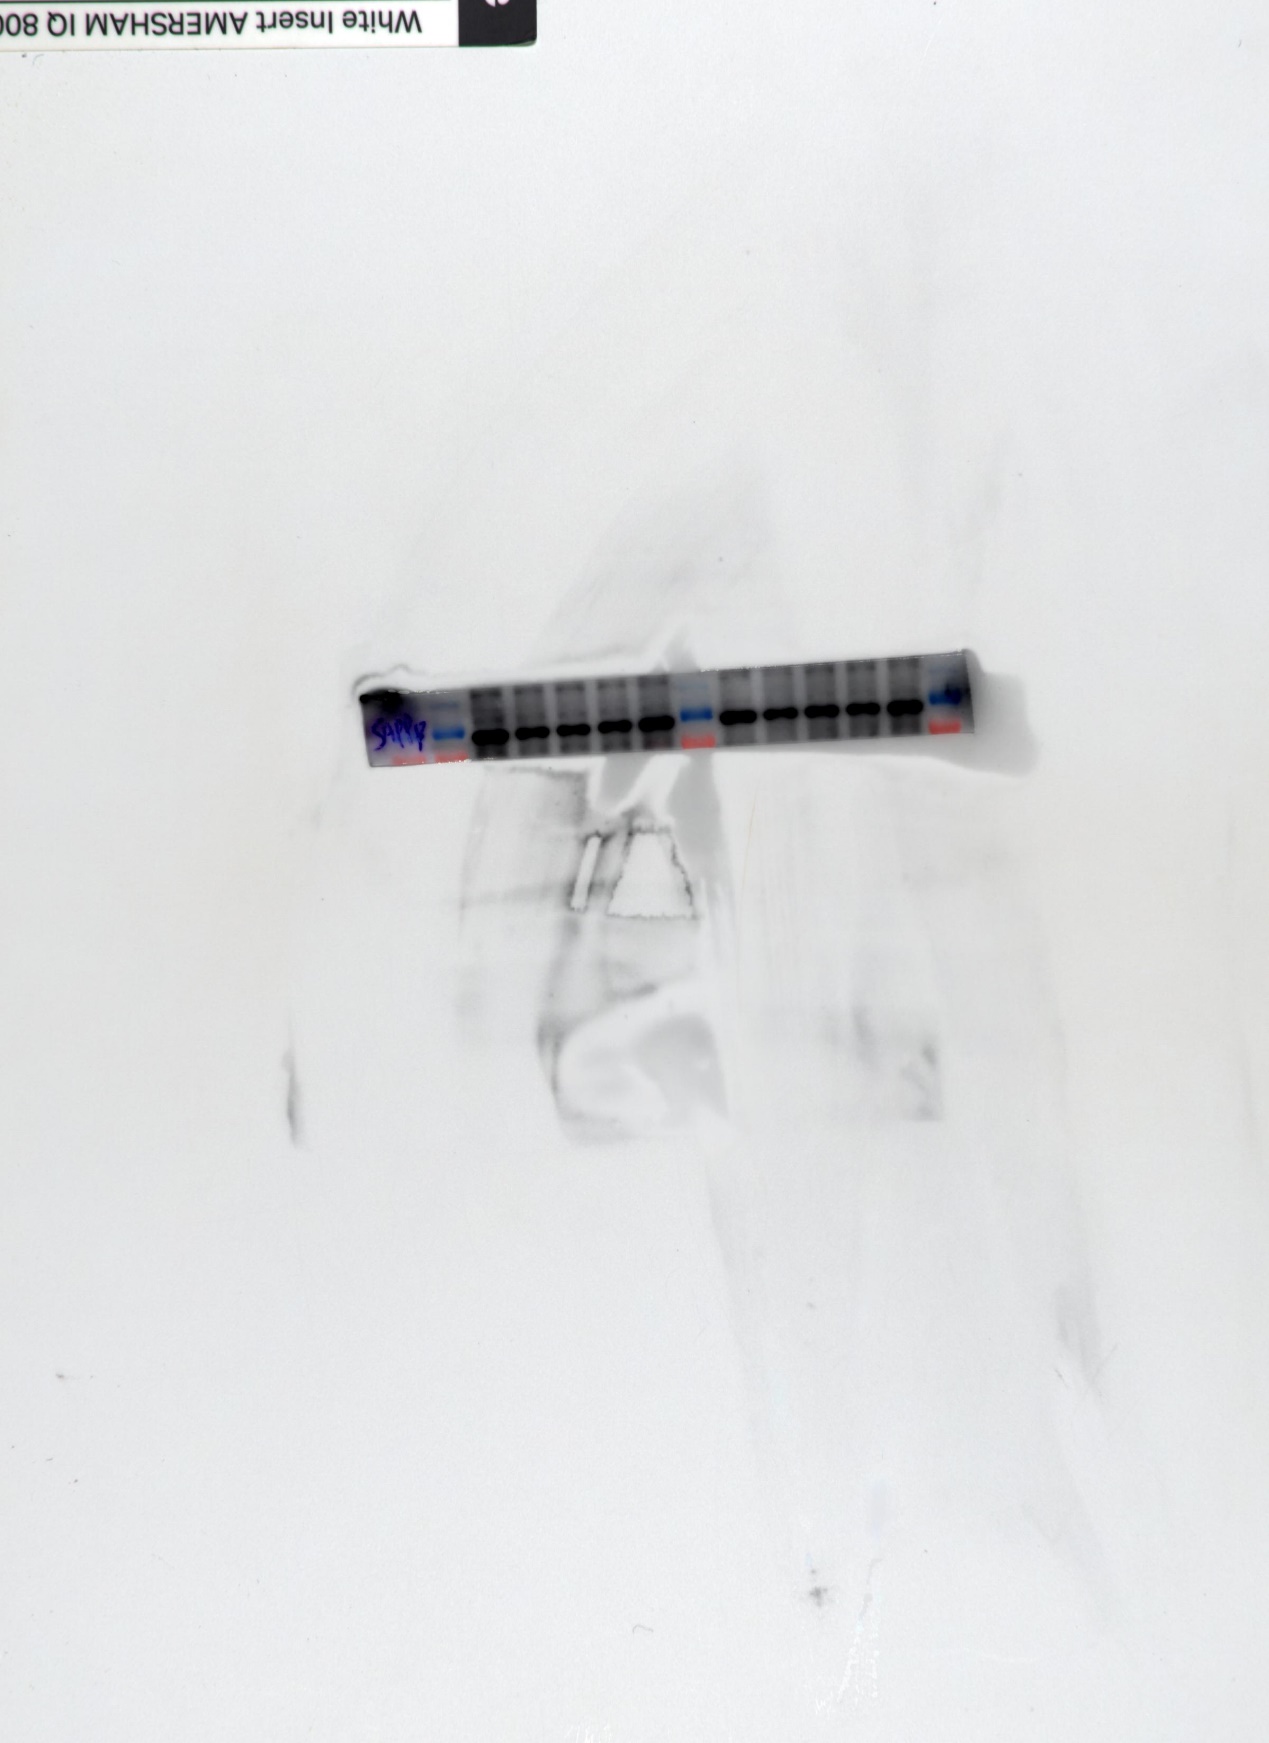


sAPPβ 97KDa


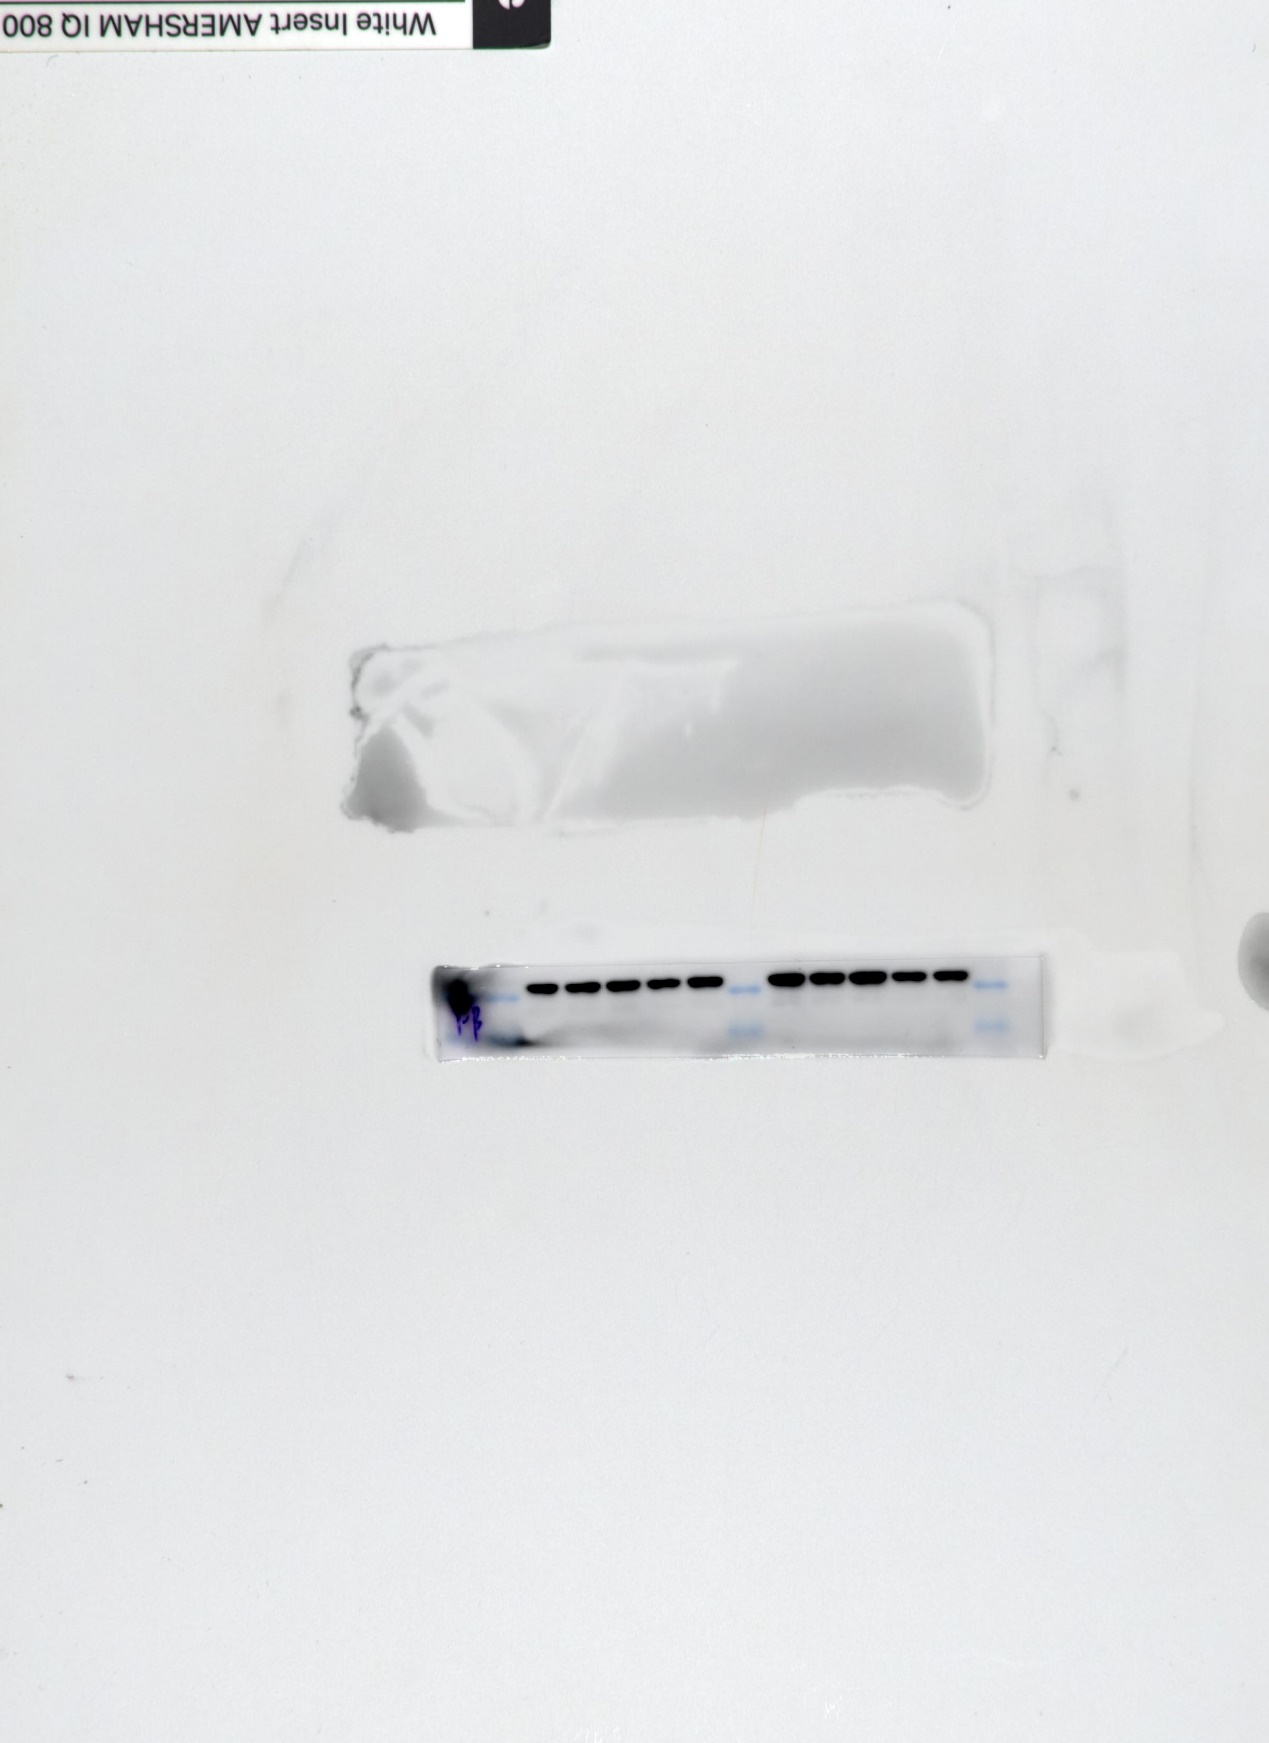


β-actin 42KDa


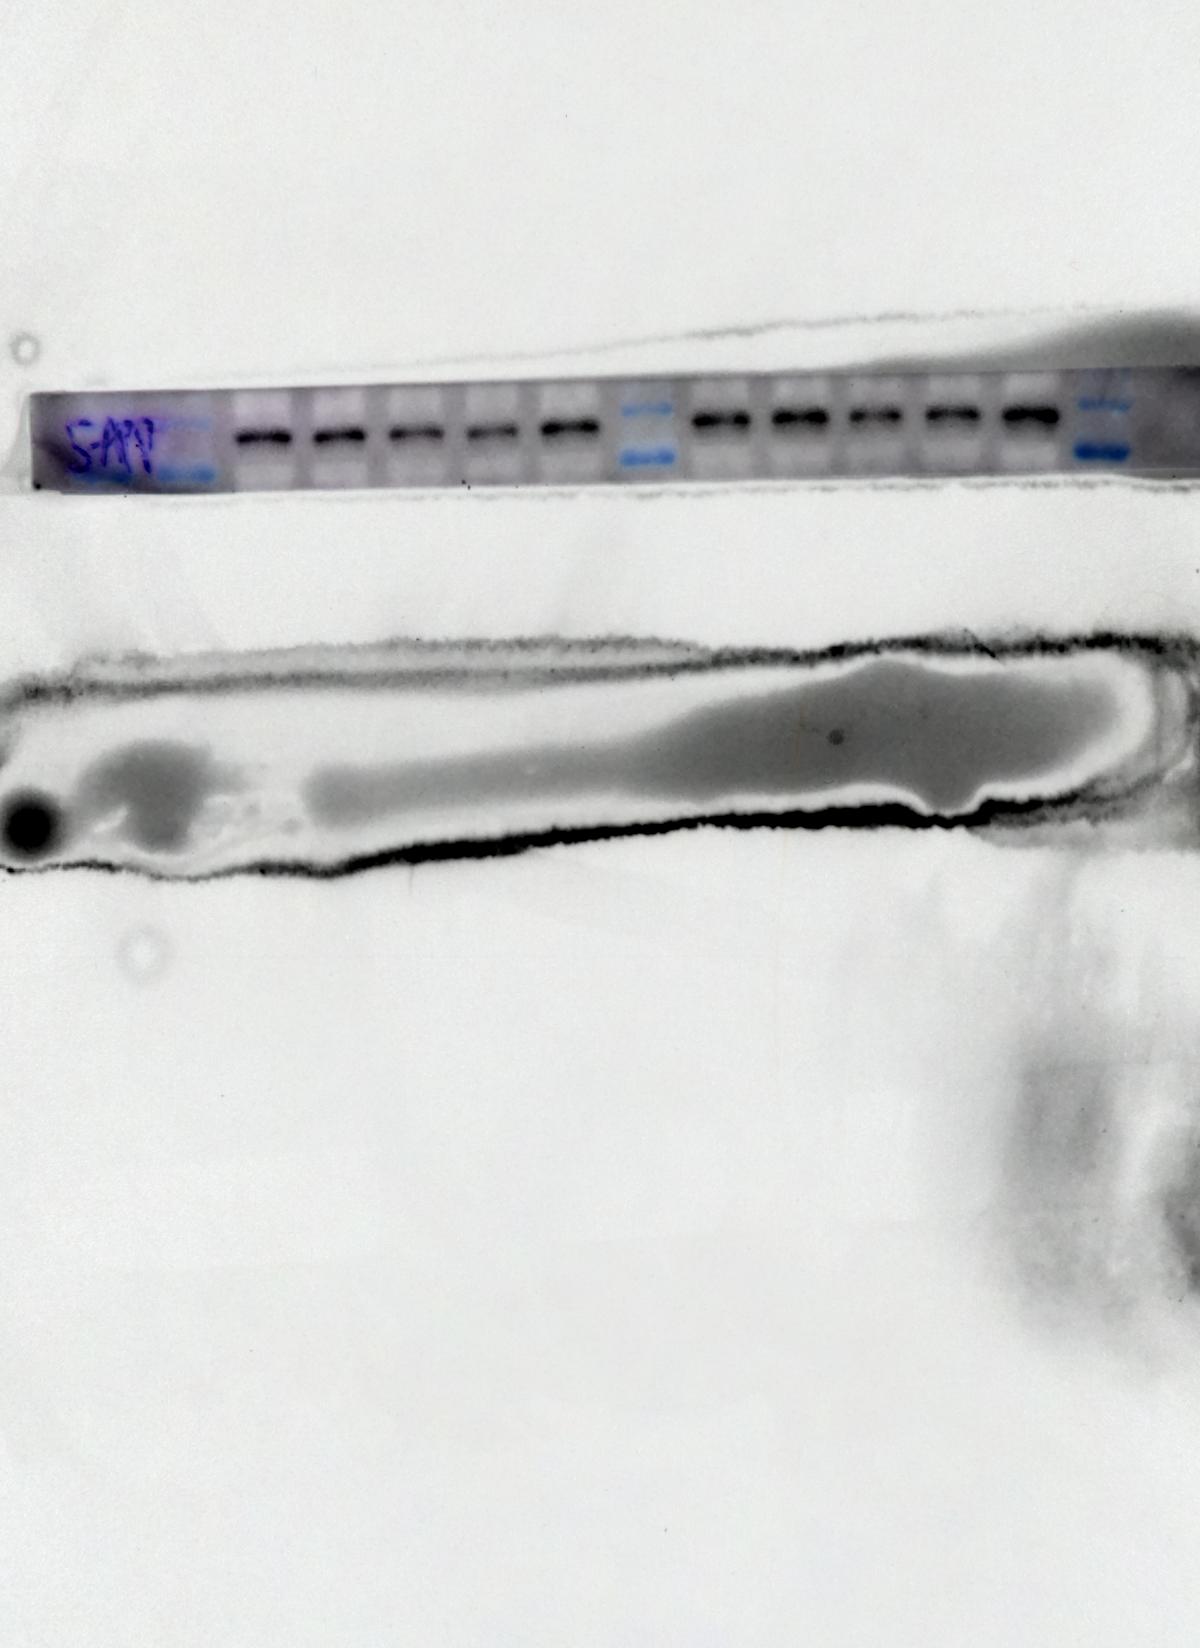


APP 110KDa


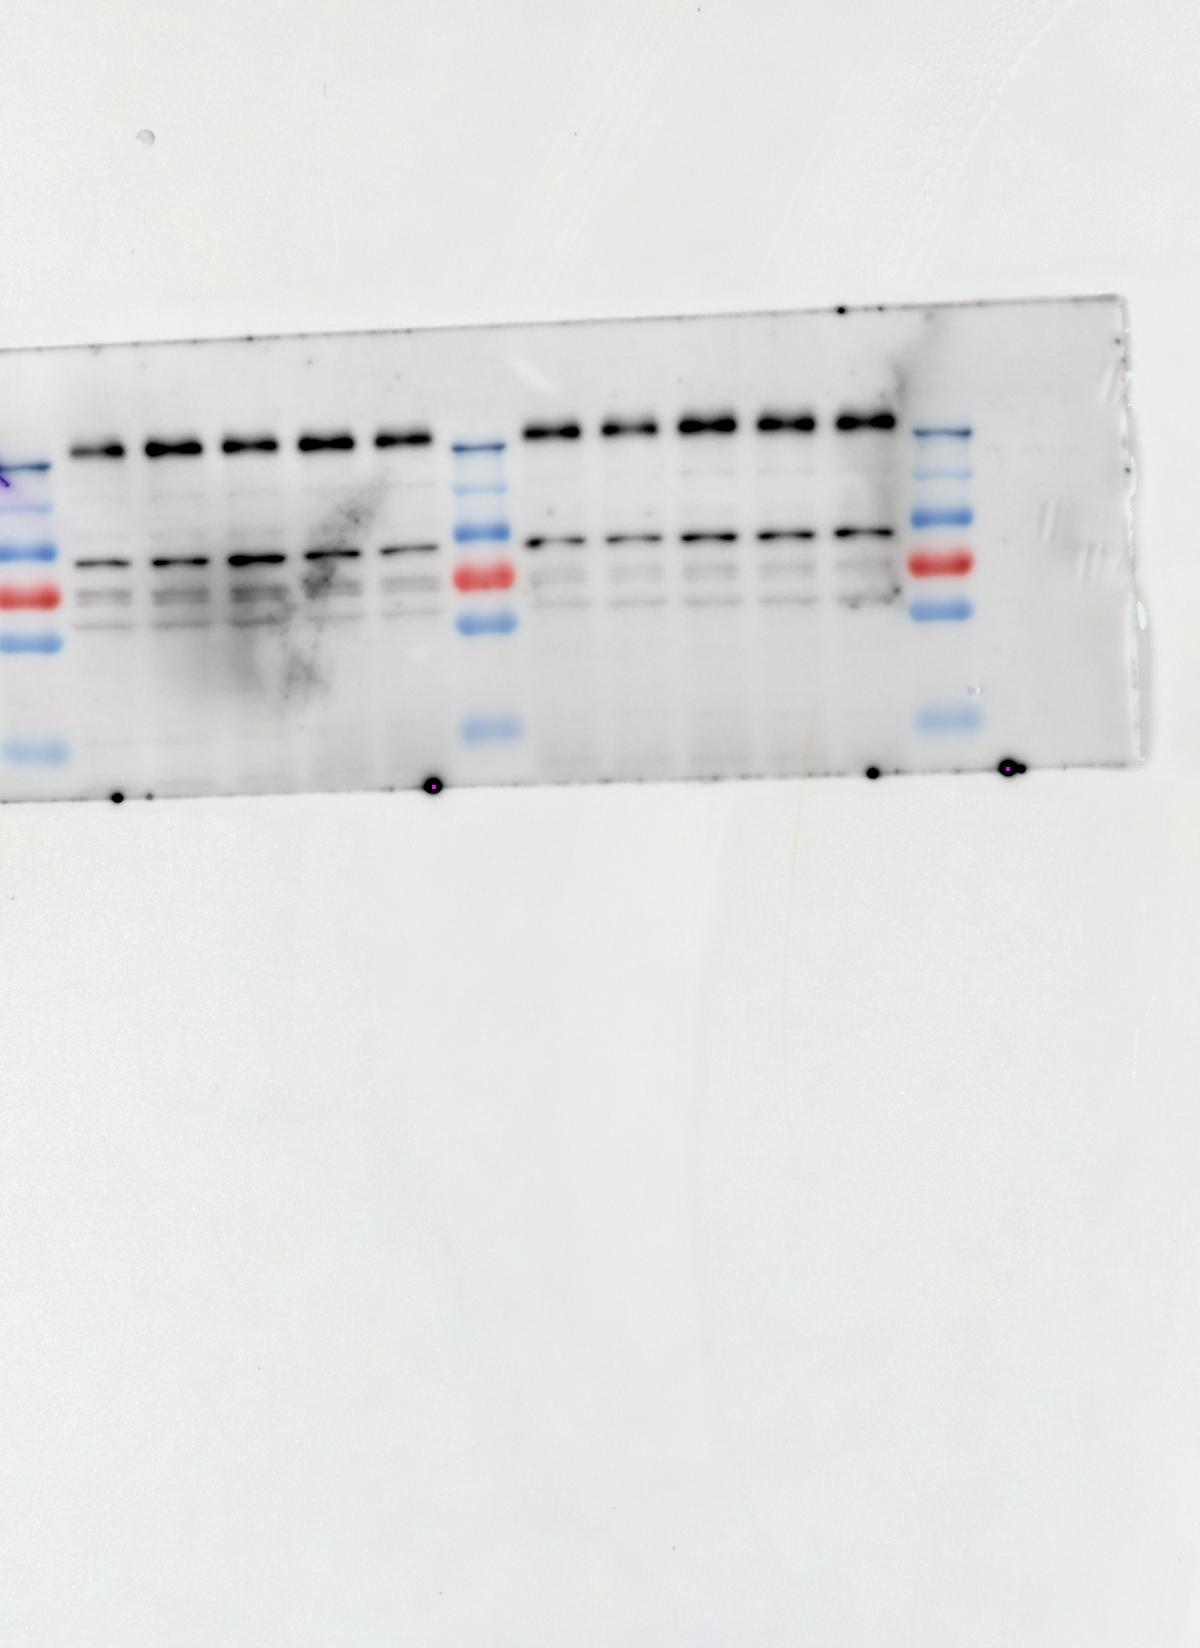


sAPPα 97KDa


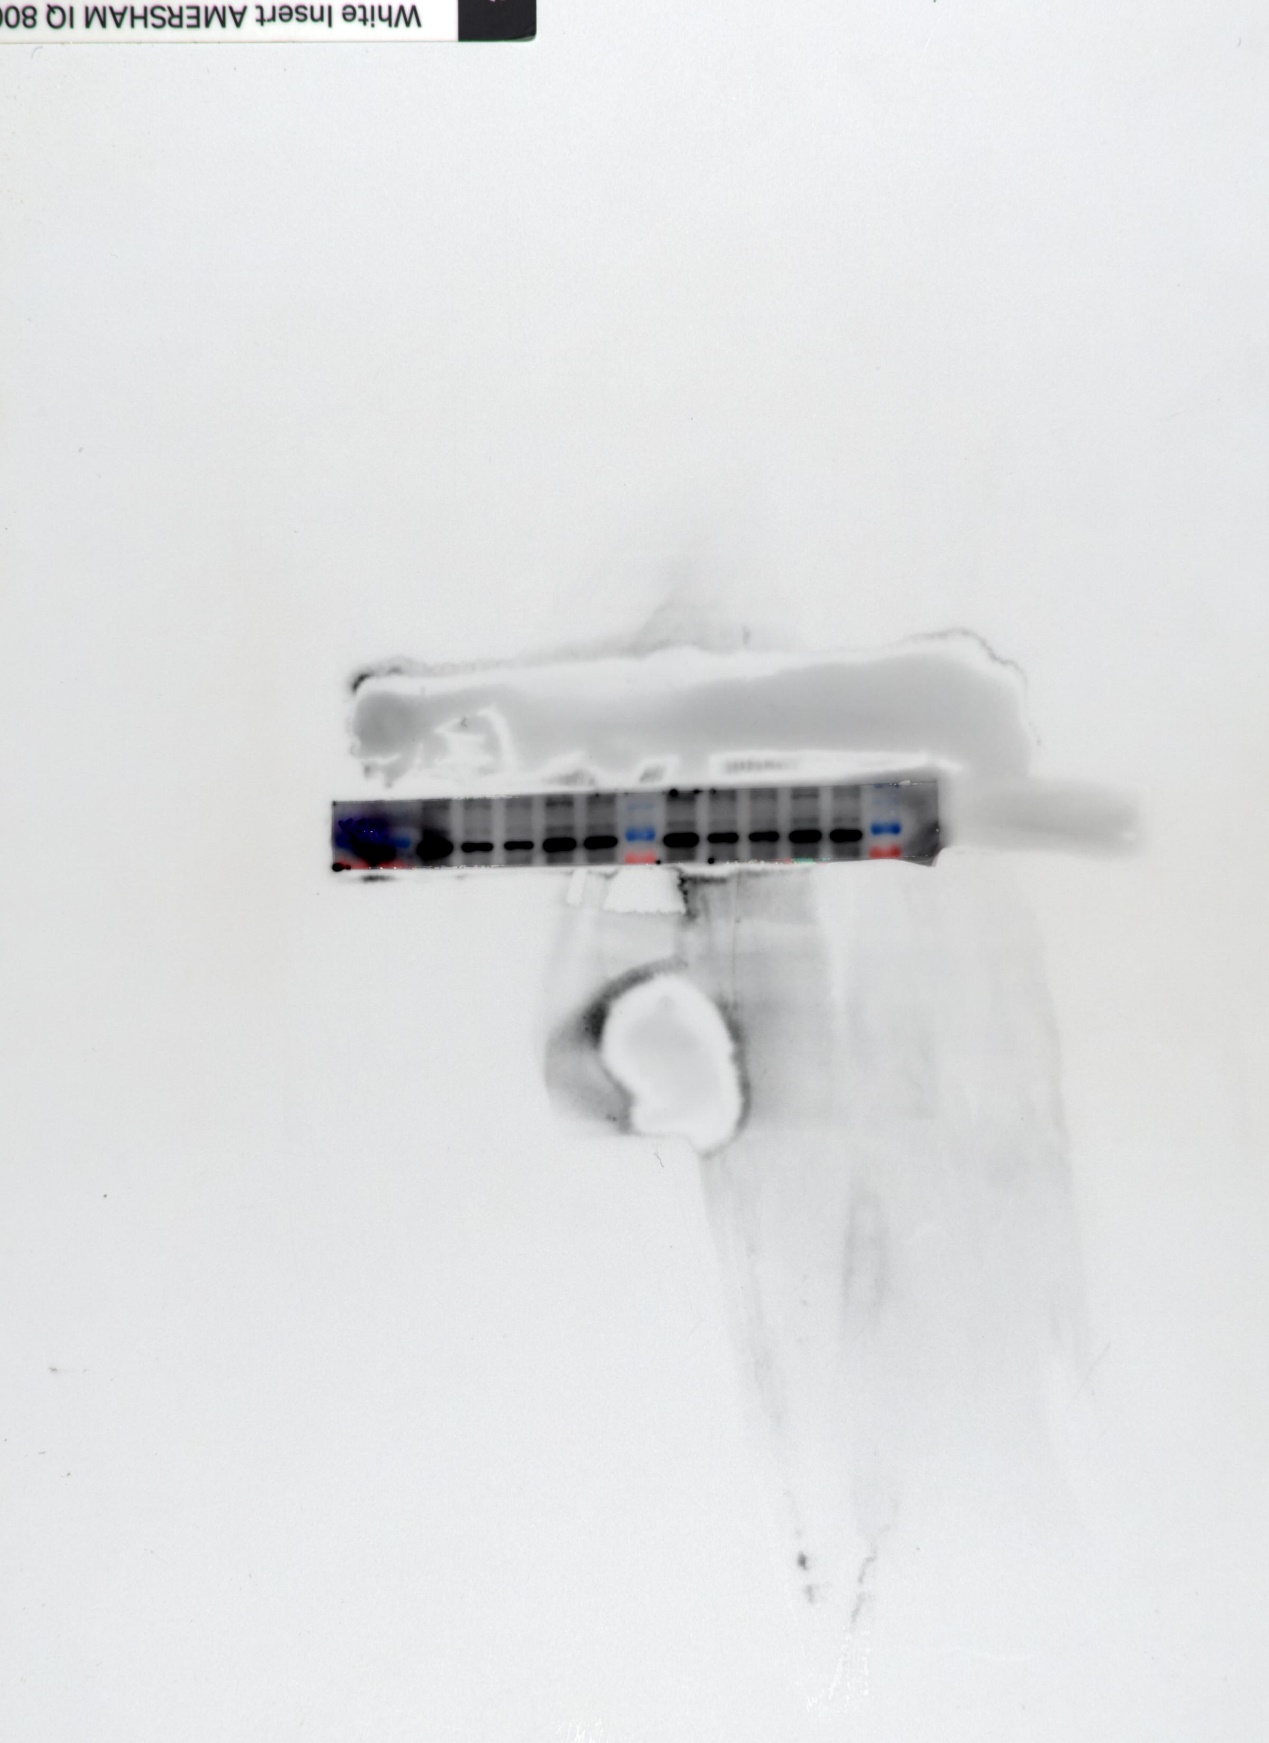


sAPPβ 97KDa


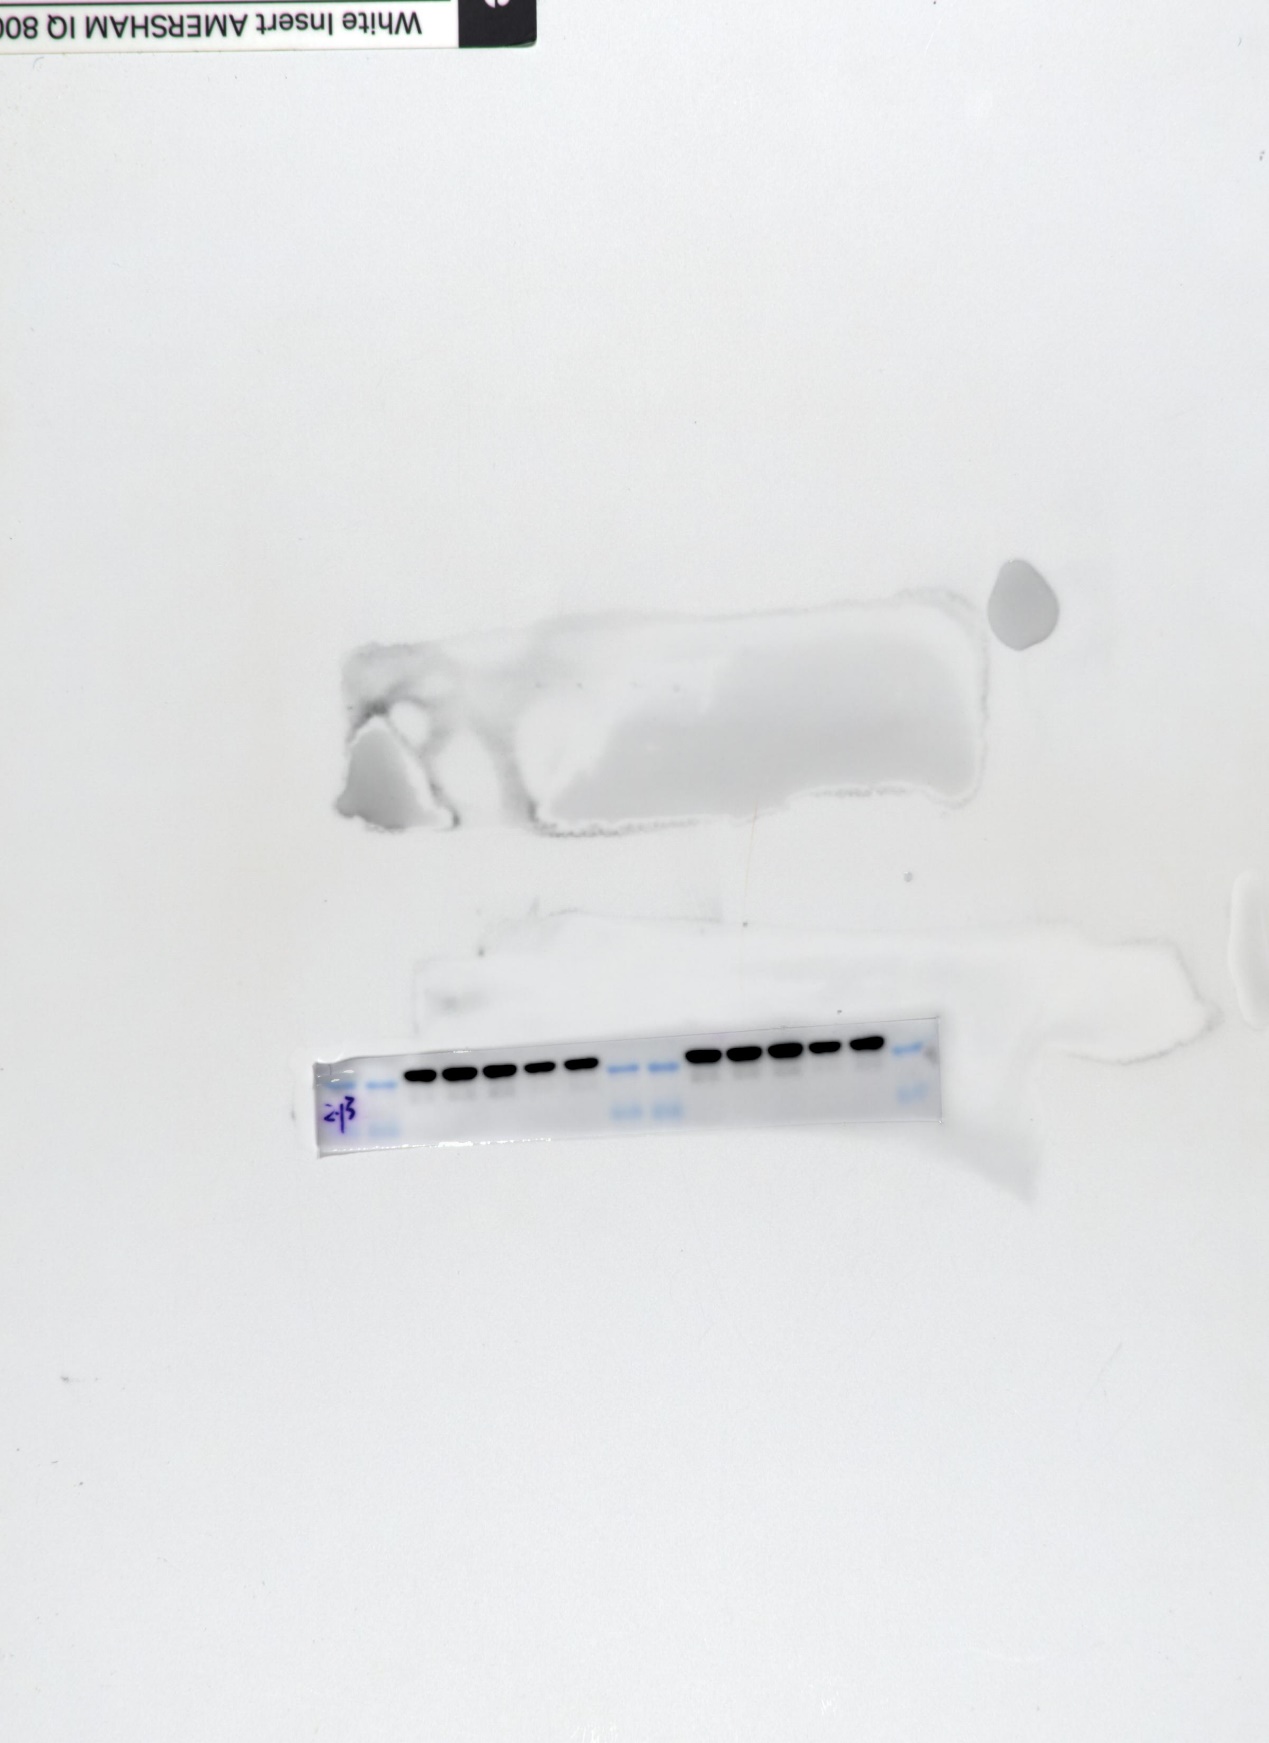


β-actin 42KDa


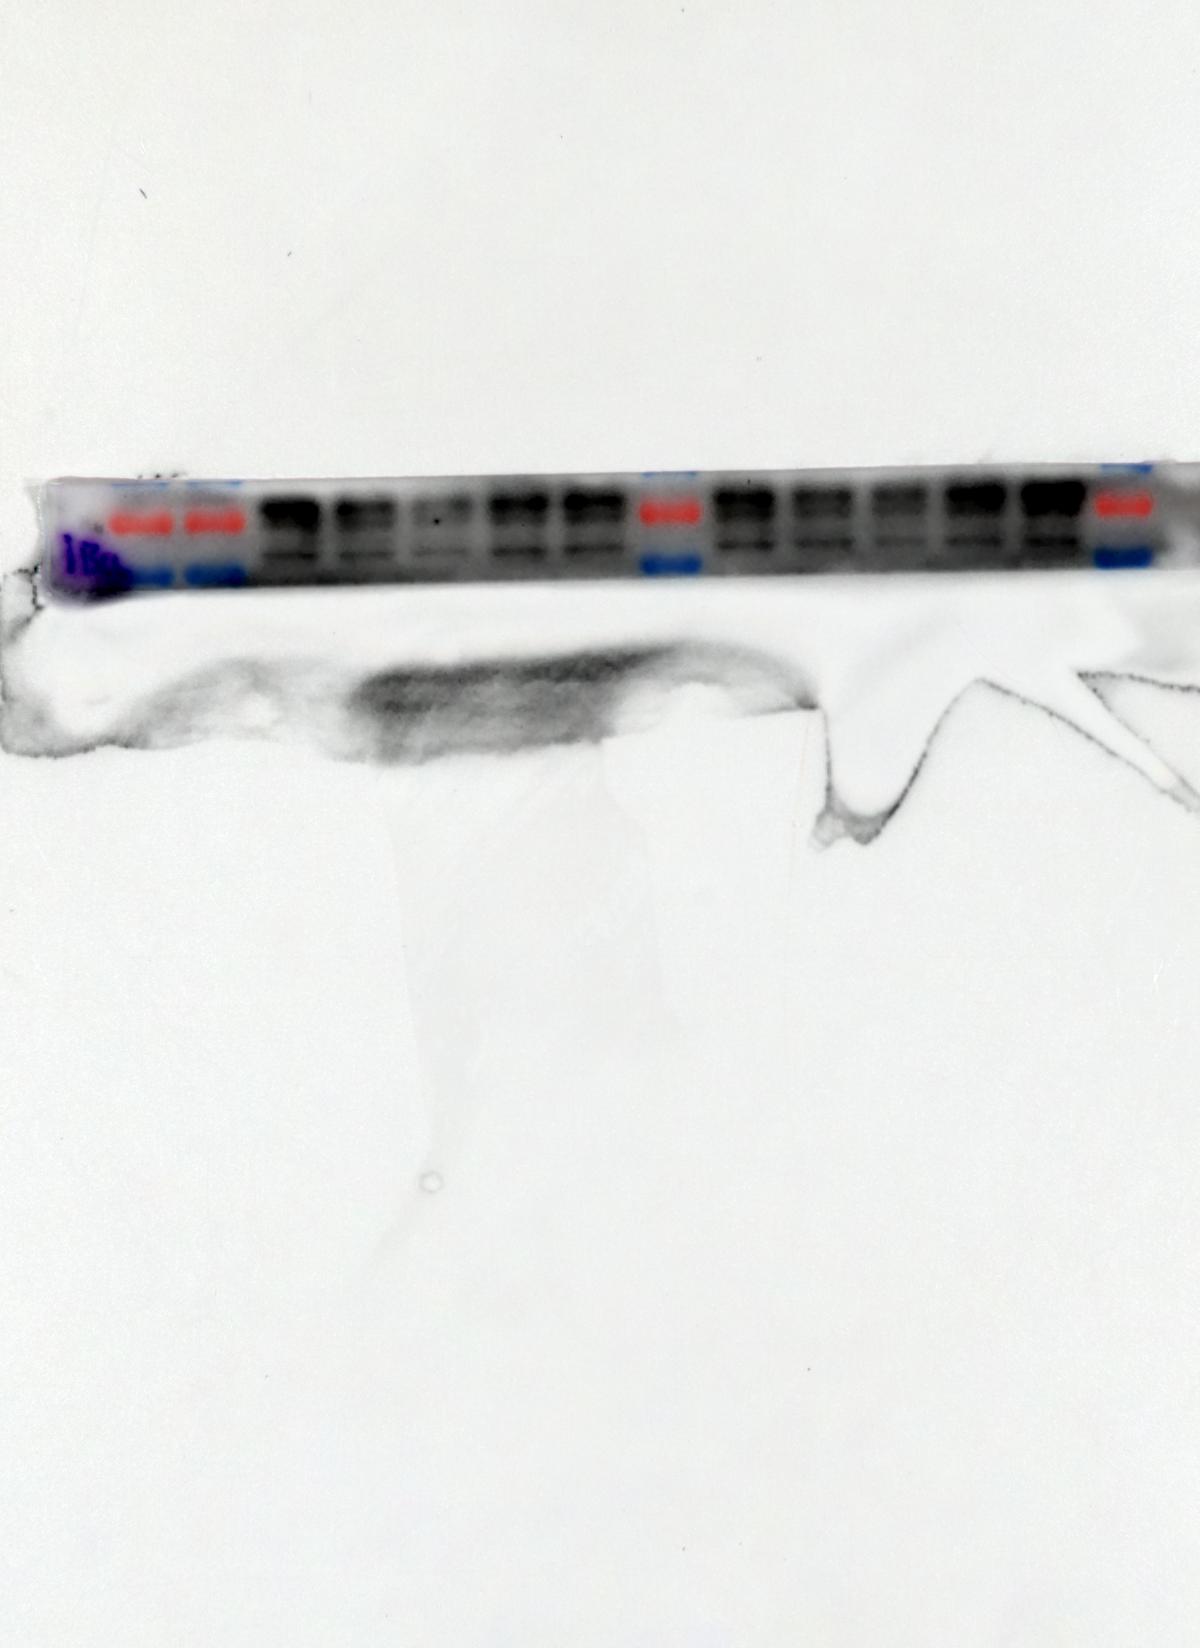


BACE1 70KDa


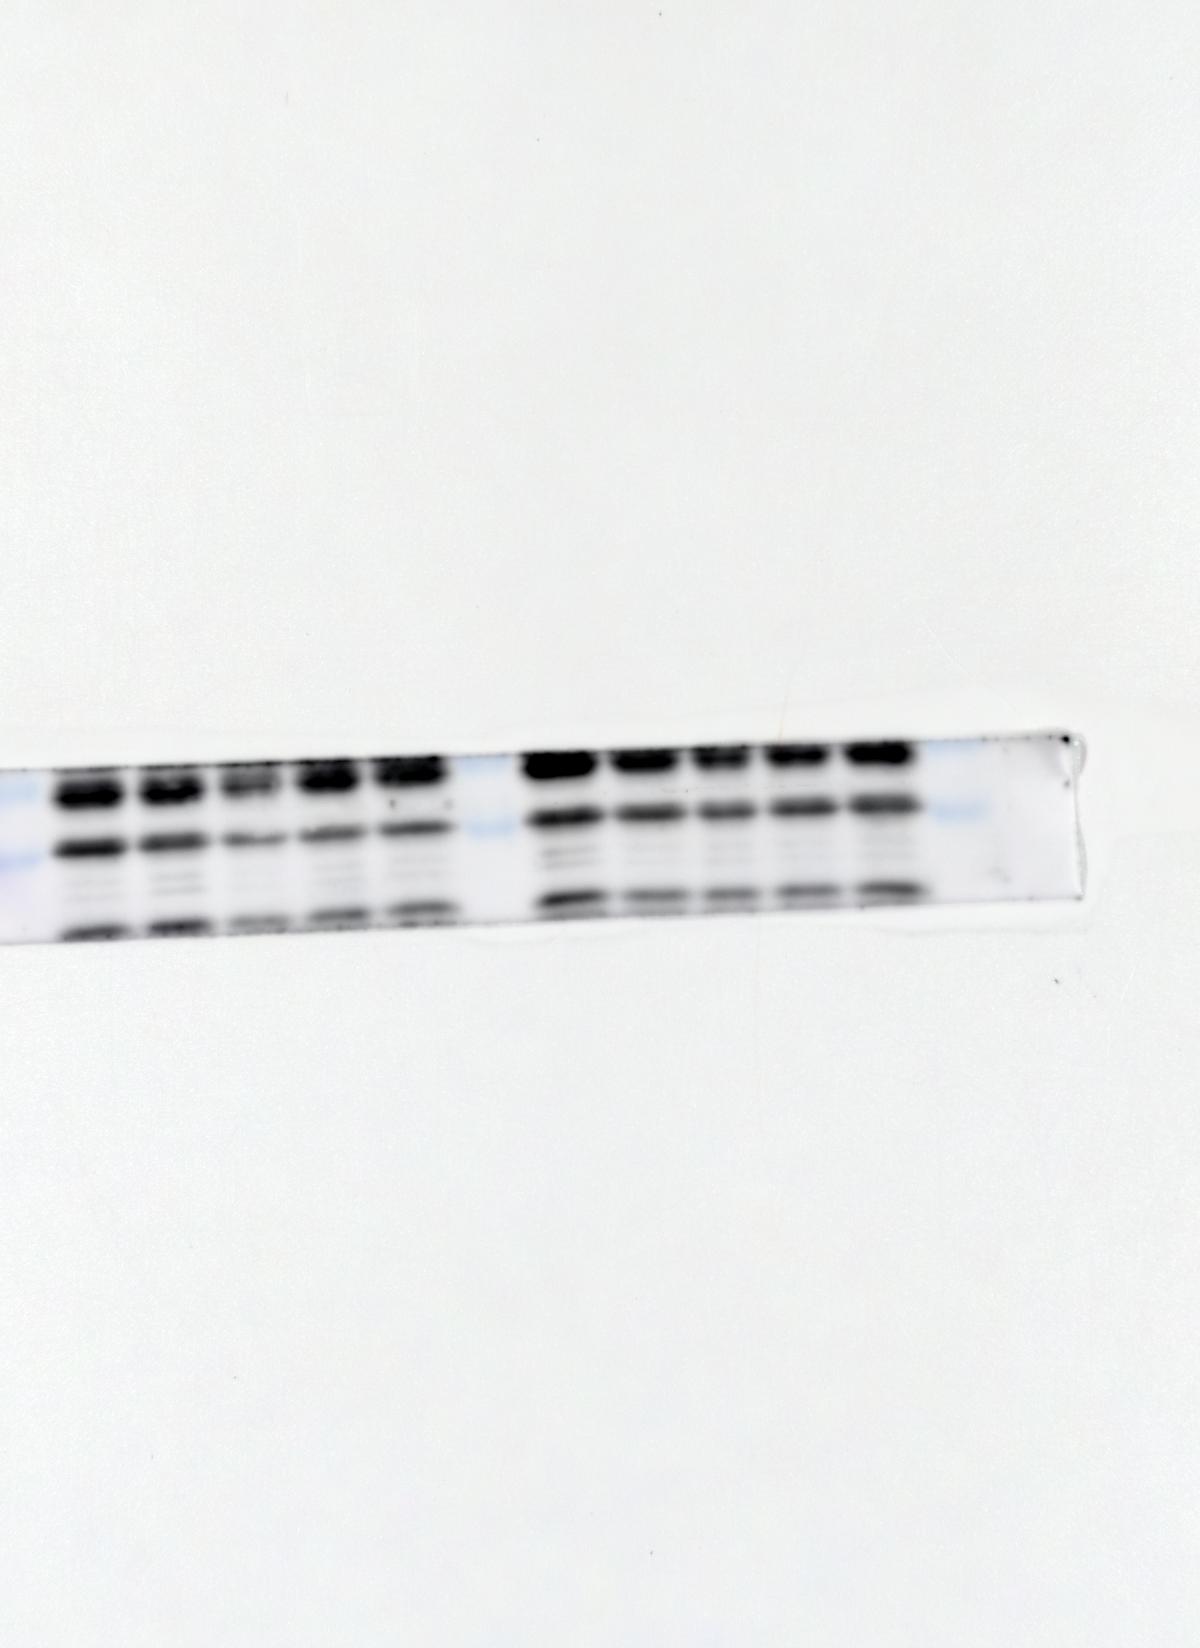


PS1 22KDa


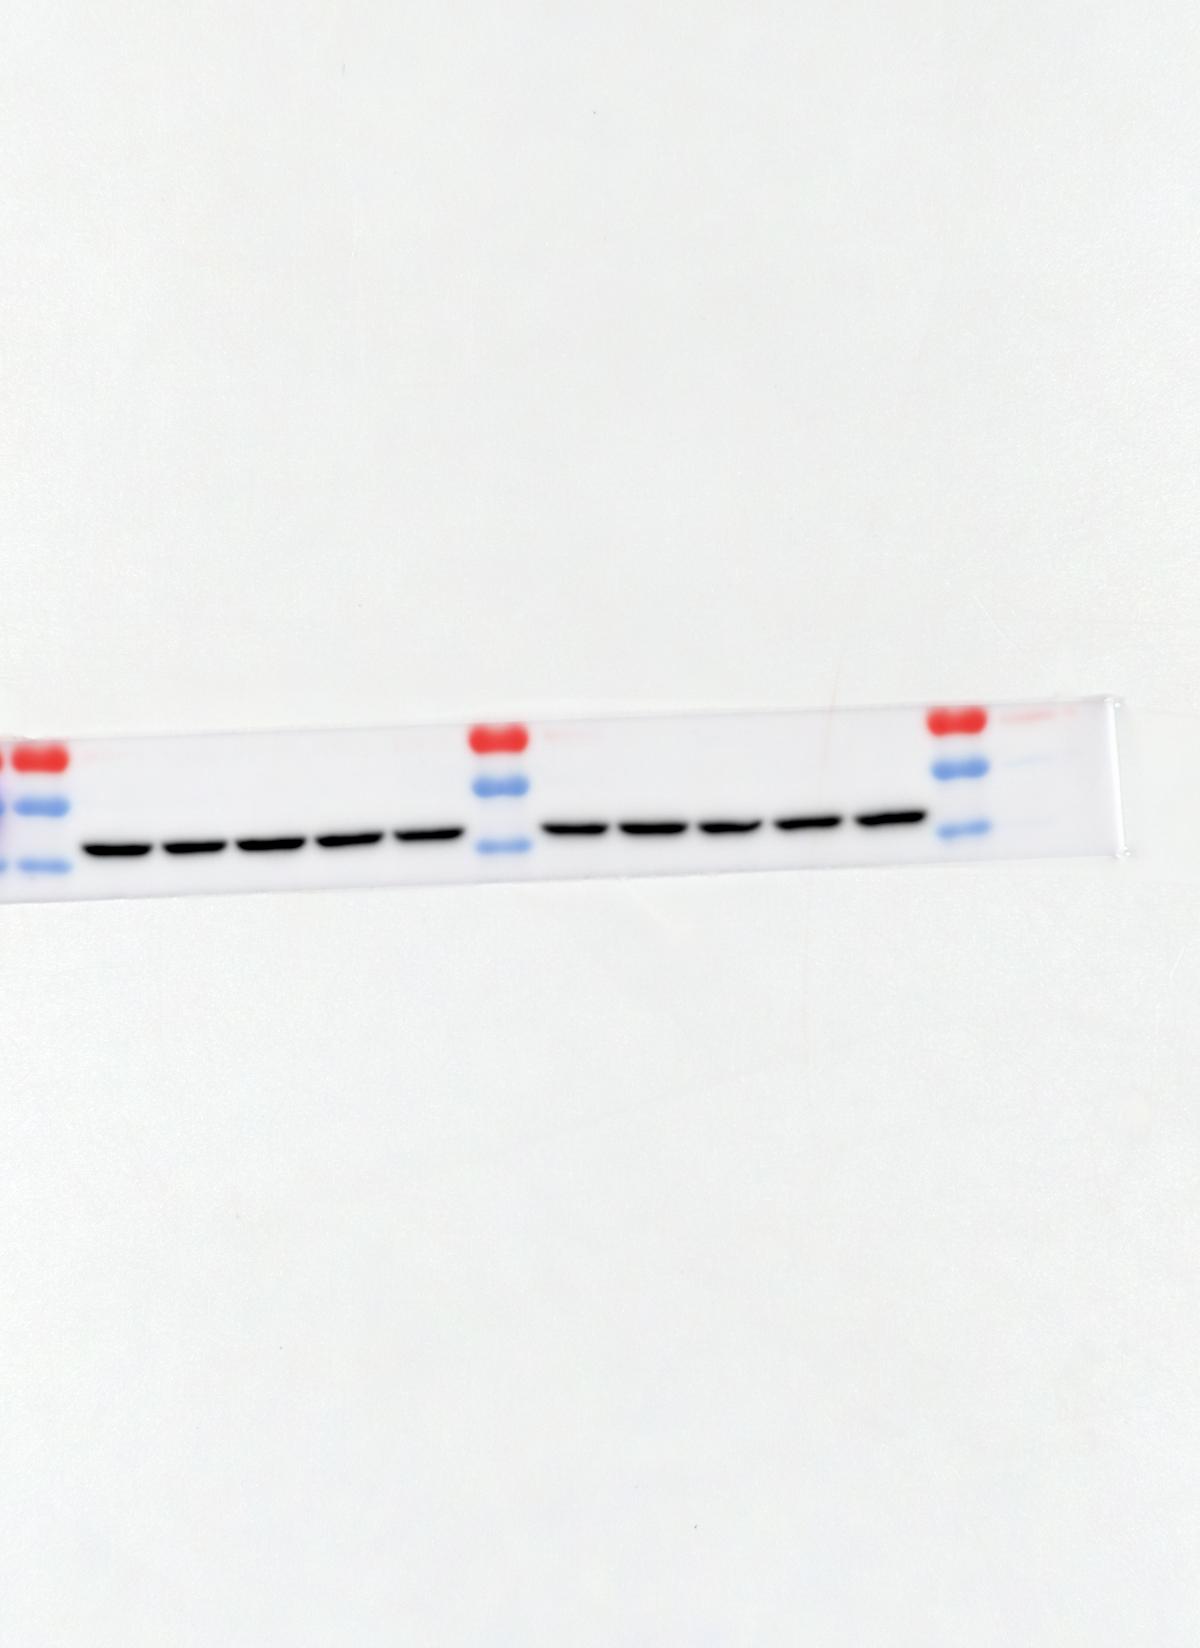


β-actin 42KDa


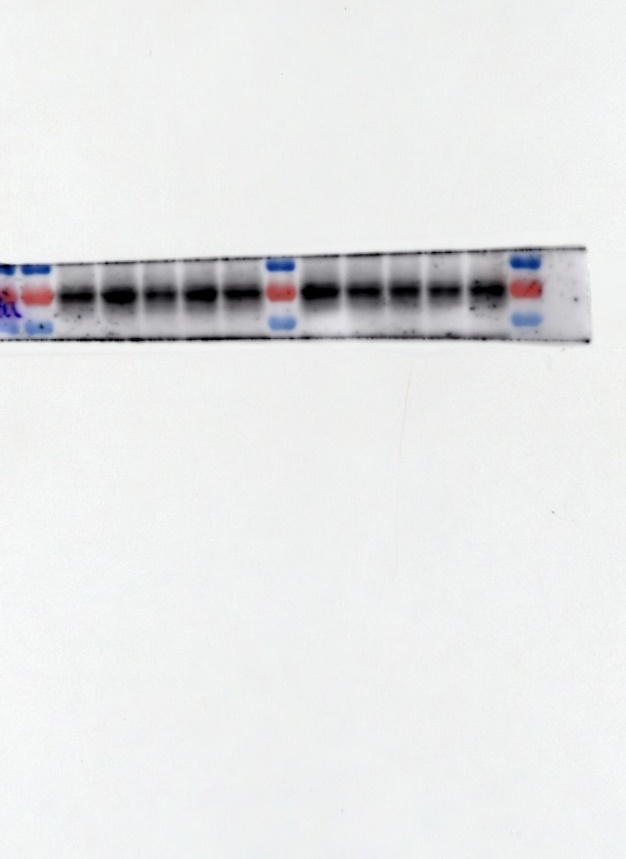


BACE1 70KDa


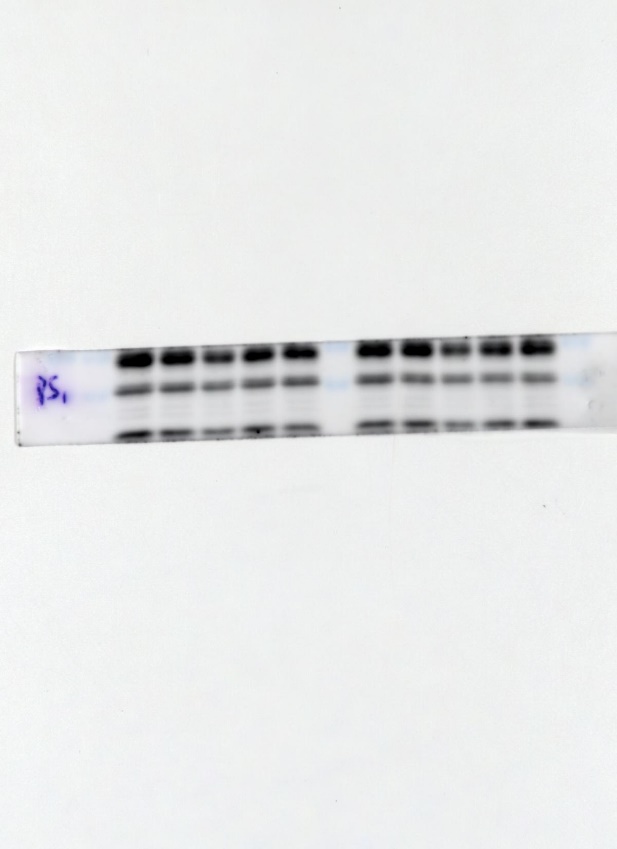


PS1 22KDa


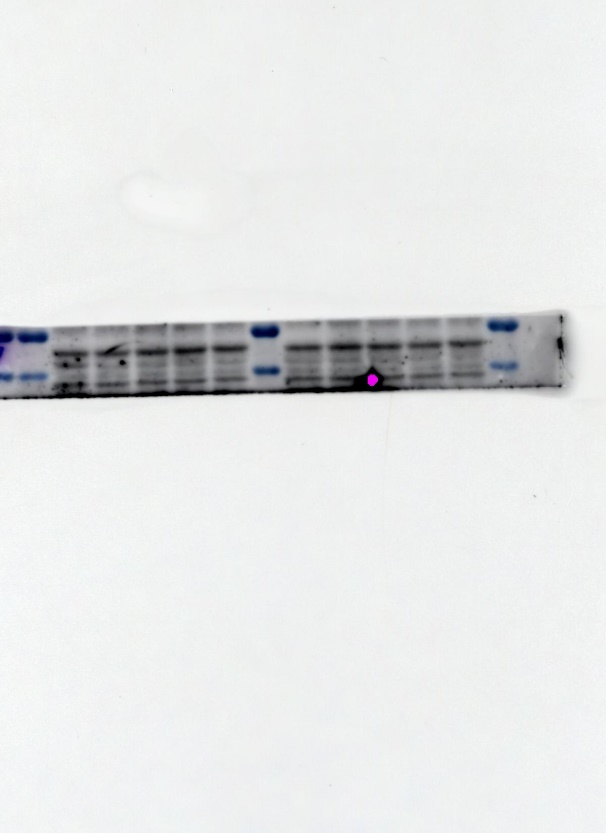


β-actin 42KDa

Figure 4. The treatment of ARC-18 reduced Aβ production in N2a/APPswe cells by regulating the APP processing pathways. (A) Original strip of western blot in APP processing pathways. Please refer to the manuscript for specific grouping and experimental conditions (n=4).
